# Supplementary material for: Kinesin-1, -2, and -3 motors use family-specific mechanochemical strategies to effectively compete with dynein during bidirectional transport
Source: eLife. 2022 Sep 20;11:e82228. doi: 10.7554/eLife.82228 (PMC9545524; doi:10.7554/eLife.82228)
Supplement: Figure 1—figure supplement 2—source data 1. [file elife-82228-fig1-figsupp2-data1.xlsx]

## Sheet: Fig. S2A
Unloaded Velocity (nm/s)
Kin1	KIn2	Kin3
580	423.846	906.25
685.455	193.333	1126.86
604.167	198.857	1087.5
797.5	354.444	659.091
638	154.667	986
761.25	225.556	1595
676.667	257.778	638
129.385	255.882	1087.5
522	290	720
652.5	203	1115.38
538.571	326.25	935.909
725	348	725
580	326.25	1012.62
696	316.364	1015
612.222	290	870
628.333	326.25	1015
725	372.857	1022.63
676.667	334.615	840.256
621.429	464	1113.6
178.462	241.667	1074.71
621.429	322.222	1097.86
580	178.462	741.111
451.111	326.25	1071.74
652.5	348	803.077
580	372.857	828.571
427.368	406	883.81
348	290	1095.56
497.143	261	904.627
290	225.556	833.75
580	217.5	603.514
490.769	331.429	656.765
580	362.5	1118.57
527.273	412.105	966.667
870	290	1087.5
602.308	290	783
471.25	235.625	797.5
464	193.333	1008.1
676.667	193.333	731.042
531.667	223.077	567.391
628.333	464	1643.33
580	124.286	910
628.333	241.667	744.248
580	124.286	789.444
621.429	225.556	245.385
522	483.333	856.512
580	210.909	684.4
435	290	477.647
628.333	338.333	953.197
483.333	116	896.126
870	193.333	725
621.429	237.273	972.037
662.857	203	943.772
696	362.5	896.977
797.5	290	930.698
676.667	238.824	1141.29
685.455	362.5	957.674
497.143	435	870
497.143	316.364	741.111
451.111	322.222	108.75
638	341.176	928
676.667	377	1160
612.222	322.222	1020.8
557.692	257.778	1042.19
418.889	314.167	950.308
580	290	892.308
580	260.508	852.941
580	290	1015
688.75	312.308	870
557.692	471.25	784.074
557.692	237.273	1208.33
870	237.273	764.545
464	217.5	854.324
462.885	471.25	918.333
386.667	696	614.8
652.5	263.636	780.769
435	340.435	665.294
825.385	178.462	764.545
773.333	290	628.333
696	290	704.286
1111.67	238.824	1189
331.429	386.667	942.5
725	386.667	1256.67
538.571	362.5	773.333
797.5	227.857	1160
418.889	232	894.167
725	272.941	870
538.571	184.545	1595
685.455	316.364	870
612.222	362.5	789.444
210.909	217.5	843.636
406	379.231	814.762
870	245.385	1341.25
628.333	314.167	870
531.667	580	844.107
455.714	459.167	894.167
638	1015	563.889
580	207.143	756.522
446.154	302.083	815.932
538.571	362.5	740.792
145	290	551
621.429	322.222	606.977
22.5243	241.667	857.206
662.857	261	1033.91
580	257.778	900.526
652.5	331.429	894.421
522	263.636	1136.8
580	290	914.13
638	290	1260
635.769	145	1046.07
580	225.556	1082.67
609	507.5	665.294
497.143	348	934.444
209.444	317.619	1015
528.824	319	998.889
628.333	497.143	836.279
580	507.5	1015
562.941	181.25	870
543.75	248.571	913.5
543.75	217.5	899
621.429	225.556	797.5
483.333	435	874.531
761.25	314.167	902.222
547.778	207.143	851.087
435	483.333	928
553.636	198.421	783
725	174	920.123
507.5	455.714	784.706
725	372.857	980
386.667	435	1005.33
421.818	543.75	821.039
870	203	943.13
435	386.667	808.162
638	348	953.815
507.5	217.5	901.752
676.667	319	784.706
531.667	271.875	968.723
386.667	241.667	683.22
331.429	290	657.333
362.5	261	966.667
754	367.333	682.353
638	225.556	825.385
483.333	257.778	1175.26
425.333	251.333	909.545
580	238.824	908.667
531.667	290	821.667
725	184.545	939.048
754	203	773.886
580	290	597.059
704.286	290	837.778
870	95.2857	775.75
130.784	257.778	960.222
662.857	248.571	558.909
580	130.968	767.215
870	203	754
483.333	638	984.242
435	580	961.579
507.5	348	773.333
725	331.429	808.699
580	435	1160
773.333	369.091
580	319
464	314.167
522	342.727
410.833	386.667
442.632	227.857
773.333	248.571
372.857	263.636
644.444	290
580	326.25
952.857	290
1885	263.636
	290
	290
	290
	386.667
	290
	290
	348
	241.667
	414.286
	232
	290
	348
	580

## Sheet: Fig. S2B
Unloaded Run Length (nm)
Kin1	KIn2	Kin3
1044	1102	4350
1508	348	7888
1450	1392	870
638	638	1450
638	464	1972
1218	406	1276
812	464	638
1682	870	870
522	406	4176
522	406	2900
754	522	4118
870	348	580
812	522	12354
696	696	812
1102	870	1044
754	522	2030
1450	522	3886
1218	870	6554
870	464	5568
464	290	3654
870	1160	3074
464	464	1334
812	522	4930
1566	348	2088
580	522	2320
1624	406	3712
348	580	1972
696	522	12122
290	406	6670
812	696	4466
1276	928	13398
464	870	1566
1160	1566	580
522	754	1740
1566	406	3132
754	754	1914
464	348	4234
812	464	7018
638	580	2610
754	928	986
580	522	5278
1508	580	16820
812	174	2842
870	406	1914
1044	580	7366
1624	464	3422
522	464	1624
754	406	23258
870	232	19894
870	580	2320
870	522	10498
928	406	21518
696	290	15428
638	406	8004
2842	812	7076
1508	580	16472
1392	348	1044
696	696	1334
812	580	1566
1276	1160	928
812	754	1160
1102	580	5104
1450	928	6670
754	754	12354
348	464	2320
696	3074	8700
812	1044	812
1102	812	870
1450	754	4234
1450	522	1450
696	522	6728
2320	348	6322
4814	754	6612
928	696	3074
522	580	2030
1044	1566	2262
2146	464	1682
928	638	3770
1392	928	986
1334	812	2378
928	696	754
1450	464	754
754	580	1856
638	638	1392
754	464	2146
580	928	870
754	406	638
1508	1392	3306
1102	580	2842
464	696	3712
406	986	3422
1392	638	2146
2262	754	4176
2552	1856	9454
638	1102	4292
638	812	4060
1160	580	6960
1160	1450	9628
754	580	14964
754	2610	1102
870	580	5220
464	290	11658
928	522	4756
812	464	6844
1566	928	16994
522	580	5684
696	348	8410
638	812	7308
3306	232	5858
812	406	3248
1218	406	2262
696	348	3364
754	1334	9338
1798	638	3596
1508	696	7192
696	406	6090
1914	290	696
870	348	3654
870	522	1798
870	406	638
870	870	11194
1218	754	3248
986	580	7830
696	870	6496
1218	754	1566
580	174	14906
1218	638	8004
580	522	11368
928	522	3016
928	870	12644
870	406	21692
522	464	21982
638	348	33002
406	522	24708
812	638	8004
638	870	18212
464	290	8062
464	464	1972
580	522	4060
754	1102	16240
638	406	6438
870	464	4466
1276	754	4002
580	812	2726
638	406	986
1160	406	7888
1508	406	27086
928	406	2030
986	580	12064
696	1334	6206
1334	464	8642
928	348	6148
580	812	12122
522	406	754
580	638	6496
1218	1044	10962
406	696	20416
580	464	19894
580	522	1856
464	812
464	638
464	754
522	754
986	464
1682	638
928	696
522	580
1160	406
696	522
1334	348
754	580
	348
	348
	406
	464
	348
	464
	696
	290
	580
	696
	290
	348
	348
