# Supplementary material for: Kinesin-1, -2, and -3 motors use family-specific mechanochemical strategies to effectively compete with dynein during bidirectional transport
Source: eLife. 2022 Sep 20;11:e82228. doi: 10.7554/eLife.82228 (PMC9545524; doi:10.7554/eLife.82228)
Supplement: Figure 1—figure supplement 3—source data 1. [file elife-82228-fig1-figsupp3-data1.xlsx]

## Sheet: Fig.S3
Track	Segments	Distance (nm)	Duration (s)	Velocity (nm/s)
1	1	-2555	4.29	-595.571
2	2	-2920	5.72	-510.49
3	1	-5183	7.15	-724.895
4	4	-949	14.586	-65.0624
5	1	-219	13.156	-16.6464
6	1	-2701	3.432	-787.005
7	1	-2117	2.574	-822.455
1	5	-4599	21.164	-217.303
2	3	-1387	14.014	-98.9725
3	1	-292	25.168	-11.602
1	6	3796	18.304	207.386
2	2	1095	15.73	69.6122
3	2	1387	19.162	72.3828
4	2	3577	15.158	235.981
5	3	4745	8.294	572.1
6	1	730	10.582	68.9851
7	2	584	18.59	31.4147
8	1	365	35.75	10.2098
1	1	-2920	5.148	-567.211
2	2	-1387	8.294	-167.229
3	1	-2628	4.29	-612.587
4	5	-5694	31.746	-179.361
5	1	-1533	2.574	-595.571
6	1	-1022	2.288	-446.678
7	4	-1314	21.45	-61.2587
1	2	-730	8.294	-88.0154
2	4	-2774	24.882	-111.486
3	5	-2482	19.734	-125.773
1	1	-2774	3.146	-881.755
2	1	-3139	29.458	-106.558
3	3	-2482	12.87	-192.852
1	1	-9198	10.582	-869.212
2	3	-2993	14.014	-213.572
3	3	-584	16.302	-35.8238
4	3	-949	12.87	-73.7374
5	3	-1095	10.01	-109.391
6	1	-3504	28.314	-123.755
7	1	-1314	24.31	-54.0518
8	3	-1314	6.864	-191.434
1	1	-3504	4.29	-816.783
2	4	-657	9.152	-71.7876
3	5	-4964	17.16	-289.277
4	1	-1314	3.432	-382.867
5	4	-2190	16.016	-136.738
6	2	-657	6.006	-109.391
7	5	-1022	19.448	-52.5504
1	1	-1825	1.43	-1276.22
2	1	-7300	18.876	-386.734
3	3	-6278	11.726	-535.391
4	2	-1460	10.296	-141.803
5	3	-1752	18.304	-95.7168
6	4	-1387	11.726	-118.284
1	4	-3066	49.764	-61.6108
2	4	-9417	20.592	-457.314
3	1	-730	7.436	-98.1711
4	2	-5037	20.592	-244.61
5	1	-2555	19.162	-133.337
1	1	-803	1.144	-701.923
2	4	-3431	10.582	-324.23
3	7	-2774	15.158	-183.006
1	1	-657	16.016	-41.0215
2	1	-1022	3.146	-324.857
3	1	-1752	2.574	-680.653
4	1	-1752	25.168	-69.6122
5	4	-5840	16.302	-358.238
6	1	-730	1.144	-638.112
7	2	-657	4.29	-153.147
1	1	-6059	8.008	-756.618
2	4	-3723	13.156	-282.989
3	1	-657	2.288	-287.15
4	1	-2701	8.008	-337.288
5	1	-1095	46.618	-23.4888
1	1	-1971	4.004	-492.258
2	5	-4234	12.584	-336.459
3	1	-1168	2.574	-453.768
4	1	-1679	2.002	-838.661
5	1	-1825	7.436	-245.428
1	4	-5110	24.024	-212.704
2	1	-7519	10.582	-710.546
3	2	-1022	8.008	-127.622
1	3	-8322	13.442	-619.104
2	2	-3796	13.442	-282.398
3	1	-3285	4.004	-820.43
4	1	-803	1.716	-467.949
5	6	-3577	80.08	-44.6678
6	1	-3431	4.576	-749.781
7	2	-657	9.152	-71.7876
1	1	-3212	3.718	-863.905
2	1	-5402	8.58	-629.604
3	3	-1679	6.292	-266.847
4	6	-3650	25.454	-143.396
1	1	-10220	10.01	-1020.98
2	3	-13578	19.162	-708.59
3	1	-949	1.144	-829.545
4	3	-1387	4.29	-323.31
5	1	-1533	3.146	-487.285
1	1	-3650	7.15	-510.49
2	1	-9782	12.584	-777.336
3	2	-876	8.58	-102.098
4	4	-1533	12.584	-121.821
5	1	-2117	1.716	-1233.68
6	1	-2263	4.004	-565.185
7	1	-1387	2.288	-606.206
8	1	-1460	3.146	-464.081
9	5	-2263	23.738	-95.3324
1	5	-16936	18.59	-911.027
2	1	-4818	11.154	-431.953
3	1	-2409	4.576	-526.442
4	1	-876	1.43	-612.587
5	3	-2847	19.448	-146.39
6	3	-2628	14.3	-183.776
7	1	-3504	4.862	-720.691
8	2	-1387	4.29	-323.31
9	4	-584	16.302	-35.8238
10	1	-2774	3.432	-808.275
11	5	-3212	12.87	-249.573
12	7	-3577	15.158	-235.981
13	3	-4599	8.58	-536.014
14	1	-2993	6.578	-455.002
15	3	-1679	7.722	-217.431
1	1	-1606	6.006	-267.399
2	1	-1825	17.446	-104.609
3	2	-949	38.896	-24.3984
4	3	-1971	13.442	-146.63
5	3	-2701	14.3	-188.881
6	1	-657	1.43	-459.441
