# Supplementary material for: Kinesin-1, -2, and -3 motors use family-specific mechanochemical strategies to effectively compete with dynein during bidirectional transport
Source: eLife. 2022 Sep 20;11:e82228. doi: 10.7554/eLife.82228 (PMC9545524; doi:10.7554/eLife.82228)
Supplement: Figure 1—figure supplement 4—source data 1. [file elife-82228-fig1-figsupp4-data1.xlsx]

## Sheet: Fig. S4A-C
DDB-Kin1 Sample Fast Traces							DDB-Kin2 Sample Fast Traces							DDB-Kin3 Sample Fast Traces
Track	Segment #	Time	Distance	Time Plot	Dist Plot		Track	Segment #	Time	Distance	Time Plot	Dist Plot		Track	Segment #	Time	Distance	Time Plot	Dist Plot
				0	0						0	0						0	0
4	1	2.002	1168	2.002	1168		1	1	2.574	146	2.574	146		1	1	1.43	73	1.43	73
4	2	2.002	438	4.004	1606		1	2	2.574	0	5.148	146		1	2	1.716	1241	3.146	1314
4	3	6.578	3942	10.582	5548		1	3	10.868	2701	16.016	2847		1	3	1.144	0	4.29	1314
4	4	2.002	292	12.584	5840									1	4	2.86	1971	7.15	3285
4	5	2.288	0	14.872	5840						0	0		1	5	1.43	146	8.58	3431
							8	1	2.574	73	2.574	73		1	6	2.002	1752	10.582	5183
				0	0		8	2	2.86	730	5.434	803		1	7	1.144	73	11.726	5256
5	1	1.144	657	1.144	657									1	8	6.006	3212	17.732	8468
5	2	1.43	219	2.574	876						0	0		1	9	2.002	73	19.734	8541
5	3	0.858	730	3.432	1606		6	1	6.864	0	6.864	0		1	10	4.004	1971	23.738	10512
							6	2	7.15	1825	14.014	1825
				0	0		6	3	2.002	0	16.016	1825						0	0
6	1	1.43	949	1.43	949		6	4	7.15	1460	23.166	3285		5	1	1.43	1679	1.43	1679
				0	0						0	0						0	0
8	1	4.576	2044	4.576	2044		14	1	2.574	657	2.574	657		2	1	7.15	5840	7.15	5840
							14	2	1.43	73	4.004	730		2	2	1.716	0	8.866	5840
				0	0		14	3	0.858	511	4.862	1241
3	1	2.002	73	2.002	73													0	0
3	2	5.434	2847	7.436	2920						0	0		1	1	3.432	3796	3.432	3796
							2	1	8.294	1825	8.294	1825		1	2	2.002	0	5.434	3796
																		0	0
														5	1	2.86	3869	2.86	3869
														5	2	1.43	0	4.29	3869
														5	3	0.858	1022	5.148	4891
														5	4	4.862	73	10.01	4964
														5	5	1.144	584	11.154	5548

## Sheet: Fig. S4D-F
DDB-Kin1 Sample Slow Traces							DDB-Kin2 Sample Slow Traces							DDB-Kin3 Sample Slow Traces
Track	Segment #	Time	Distance	Time Plot	Dist Plot		Track	Segment #	Time	Distance	Time Plot	Dist Plot		Track	Segment #	Time	Distance	Time Plot	Dist Plot
				0	0						0	0						0	0
5	1	4.004	-1460	4.004	-1460		3	1	1.716	0	1.716	0		2	1	3.432	-365	3.432	-365
5	2	2.002	0	6.006	-1460		3	2	1.144	-365	2.86	-365		2	2	3.718	0	7.15	-365
5	3	4.862	-1825	10.868	-3285		3	3	4.862	-365	7.722	-730		2	3	0.858	-219	8.008	-584
5	4	4.862	-584	15.73	-3869		3	4	3.718	-2117	11.44	-2847		2	4	3.146	0	11.154	-584
5	5	1.43	-1168	17.16	-5037									2	5	1.43	-438	12.584	-1022
5	6	1.43	-146	18.59	-5183						0	0
5	7	15.73	-292	34.32	-5475		1	1	12.584	0	12.584	0						0	0
5	8	8.294	-1095	42.614	-6570		1	2	4.004	1095	16.588	1095		3	1	4.004	-949	4.004	-949
5	9	1.43	-803	44.044	-7373		1	3	8.294	0	24.882	1095		3	2	5.148	-73	9.152	-1022
5	10	1.144	0	45.188	-7373		1	4	1.43	365	26.312	1460
5	11	2.288	-1022	47.476	-8395		1	5	2.574	0	28.886	1460						0	0
5	12	8.294	-219	55.77	-8614		1	6	2.288	803	31.174	2263		1	1	1.43	0	1.43	0
5	13	1.144	146	56.914	-8468									1	2	1.43	584	2.86	584
5	14	21.164	-146	78.078	-8614						0	0		1	3	2.574	0	5.434	584
							11	1	45.474	73	45.474	73		1	4	3.718	2190	9.152	2774
				0	0		11	2	0.858	-219	46.332	-146		1	5	3.432	146	12.584	2920
6	1	9.724	-73	9.724	-73		11	3	2.288	0	48.62	-146		1	6	4.576	0	17.16	2920
6	2	1.43	-365	11.154	-438		11	4	5.72	-876	54.34	-1022		1	7	2.574	1533	19.734	4453
6	3	3.432	0	14.586	-438		11	5	6.578	0	60.918	-1022		1	8	25.454	73	45.188	4526
6	4	1.716	-146	16.302	-584
6	5	3.146	0	19.448	-584						0	0						0	0
							4	1	23.738	-2555	23.738	-2555		4	1	2.86	0	2.86	0
				0	0		4	2	15.158	-73	38.896	-2628		4	2	6.578	-657	9.438	-657
1	1	5.148	0	5.148	0		4	3	6.006	-949	44.902	-3577		4	3	2.002	-657	11.44	-1314
1	2	3.146	876	8.294	876		4	4	3.146	-73	48.048	-3650		4	4	1.43	0	12.87	-1314
1	3	3.146	73	11.44	949		4	5	2.574	-292	50.622	-3942		4	5	8.866	-2190	21.736	-3504
1	4	1.43	146	12.87	1095		4	6	2.574	-73	53.196	-4015		4	6	3.432	0	25.168	-3504
1	5	7.722	0	20.592	1095		4	7	11.726	-1022	64.922	-5037		4	7	8.008	-1460	33.176	-4964
1	6	4.004	803	24.596	1898									4	8	8.294	-803	41.47	-5767
1	7	2.86	73	27.456	1971						0	0
1	8	3.146	1460	30.602	3431		15	1	29.172	-438	29.172	-438						0	0
														1	1	82.082	0	82.082	0
				0	0									1	2	2.86	-365	84.942	-365
1	1	10.296	146	10.296	146									1	3	8.294	-73	93.236	-438
1	2	3.146	803	13.442	949									1	4	2.288	-438	95.524	-876
1	3	2.86	-73	16.302	876
1	4	1.43	219	17.732	1095													0	0
1	5	28.028	146	45.76	1241									1	1	2.86	1898	2.86	1898
1	6	5.72	657	51.48	1898									1	2	2.86	146	5.72	2044
														1	3	1.144	949	6.864	2993
				0	0									1	4	4.862	73	11.726	3066
1	1	8.58	146	8.58	146									1	5	4.862	803	16.588	3869
1	2	10.868	1168	19.448	1314									1	6	3.432	0	20.02	3869
1	3	3.432	-73	22.88	1241									1	7	10.01	1898	30.03	5767
1	4	6.006	438	28.886	1679									1	8	2.288	0	32.318	5767
1	5	2.288	0	31.174	1679									1	9	1.43	365	33.748	6132
1	6	3.718	1095	34.892	2774
1	7	10.582	219	45.474	2993
1	8	7.436	2847	52.91	5840
1	9	9.438	73	62.348	5913
1	10	2.574	1095	64.922	7008

## Sheet: Fig. S4G-I
DDB-Kin1 Sample Directional Switch							DDB-Kin2 Sample Directional Switch							DDB-Kin3 Sample Directional Switch
Track	Segment #	Time	Distance	Time Plot	Dist Plot		Track	Segment #	Time	Distance	Time Plot	Dist Plot		Track	Segment #	Time	Distance	Time Plot	Dist Plot
				0	0						0	0						0	0
5	1	2.86	584	2.86	584		2	1	2.002	-730	2.002	-730		9	1	10.01	10877	10.01	10877
5	2	3.432	73	6.292	657		2	2	2.288	0	4.29	-730		9	2	3.146	73	13.156	10950
5	3	1.43	-1022	7.722	-365		2	3	1.43	292	5.72	-438		9	3	2.002	-292	15.158	10658
5	4	2.288	-219	10.01	-584		2	4	4.29	-292	10.01	-730
5	5	5.72	219	15.73	-365		2	5	1.144	-657	11.154	-1387						0	0
5	6	1.144	365	16.874	0		2	6	2.002	-73	13.156	-1460		13	1	5.148	219	5.148	219
5	7	12.584	365	29.458	365		2	7	1.43	292	14.586	-1168		13	2	3.432	657	8.58	876
5	8	1.716	365	31.174	730		2	8	4.29	-876	18.876	-2044		13	3	1.43	803	10.01	1679
5	9	20.306	146	51.48	876		2	9	2.574	0	21.45	-2044		13	4	8.008	0	18.018	1679
							2	10	7.436	-1168	28.886	-3212		13	5	7.436	-1022	25.454	657
				0	0		2	11	1.144	292	30.03	-2920		13	6	22.88	-584	48.334	73
2	1	8.008	73	8.008	73		2	12	2.574	0	32.604	-2920
2	2	1.43	-438	9.438	-365		2	13	2.002	-876	34.606	-3796						0	0
2	3	11.726	292	21.164	-73		2	14	1.716	219	36.322	-3577		8	1	2.86	0	2.86	0
2	4	1.144	-219	22.308	-292		2	15	0.858	-438	37.18	-4015		8	2	3.146	-438	6.006	-438
2	5	2.574	511	24.882	219		2	16	1.716	0	38.896	-4015		8	3	10.296	73	16.302	-365
2	6	9.152	-73	34.034	146									8	4	2.288	511	18.59	146
2	7	0.572	-511	34.606	-365						0	0		8	5	6.006	-657	24.596	-511
2	8	41.47	-876	76.076	-1241		3	1	6.864	1168	6.864	1168		8	6	5.72	-73	30.316	-584
2	9	0.858	-365	76.934	-1606		3	2	16.874	-146	23.738	1022
2	10	11.154	-219	88.088	-1825		3	3	3.718	-292	27.456	730						0	0
2	11	3.146	-365	91.234	-2190		3	4	4.576	-73	32.032	657		2	1	32.032	-73	32.032	-73
							3	5	12.298	-2482	44.33	-1825		2	2	3.146	-730	35.178	-803
				0	0									2	3	0.858	219	36.036	-584
3	1	2.86	0	2.86	0						0	0		2	4	3.146	0	39.182	-584
3	2	0.858	-146	3.718	-146		9	1	4.576	146	4.576	146		2	5	0.572	-365	39.754	-949
3	3	4.004	0	7.722	-146		9	2	1.716	-292	6.292	-146		2	6	9.438	-73	49.192	-1022
3	4	0.572	219	8.294	73		9	3	2.86	0	9.152	-146		2	7	8.58	-438	57.772	-1460
3	5	2.574	0	10.868	73		9	4	4.576	-1606	13.728	-1752
3	6	5.434	-1095	16.302	-1022													0	0
3	7	2.288	73	18.59	-949						0	0		3	1	7.722	219	7.722	219
3	8	2.002	-730	20.592	-1679		2	1	6.006	365	6.006	365		3	2	3.146	803	10.868	1022
3	9	1.43	-73	22.022	-1752		2	2	3.146	-73	9.152	292		3	3	11.44	146	22.308	1168
3	10	1.43	-1606	23.452	-3358		2	3	3.718	219	12.87	511		3	4	3.718	438	26.026	1606
3	11	2.574	-1168	26.026	-4526		2	4	3.146	-1022	16.016	-511		3	5	5.148	0	31.174	1606
3	12	1.716	0	27.742	-4526									3	6	2.002	-438	33.176	1168
											0	0		3	7	1.144	292	34.32	1460
				0	0		13	1	4.29	365	4.29	365		3	8	10.868	73	45.188	1533
3	1	8.58	438	8.58	438		13	2	12.298	146	16.588	511		3	9	1.43	-219	46.618	1314
3	2	2.002	-949	10.582	-511		13	3	2.002	-219	18.59	292		3	10	1.716	365	48.334	1679
3	3	1.43	0	12.012	-511		13	4	4.004	365	22.594	657		3	11	6.292	73	54.626	1752
							13	5	5.434	73	28.028	730		3	12	3.718	-803	58.344	949
				0	0		13	6	1.144	292	29.172	1022		3	13	3.146	0	61.49	949
4	1	2.574	-730	2.574	-730		13	7	10.582	73	39.754	1095		3	14	9.438	-365	70.928	584
4	2	5.148	-73	7.722	-803
4	3	5.72	-1168	13.442	-1971						0	0						0	0
4	4	4.004	-73	17.446	-2044		1	1	2.574	-511	2.574	-511		2	1	3.146	-73	3.146	-73
4	5	0.858	219	18.304	-1825		1	2	8.58	0	11.154	-511		2	2	5.72	584	8.866	511
4	6	1.716	-511	20.02	-2336		1	3	5.148	1314	16.302	803		2	3	2.288	0	11.154	511
4	7	2.574	0	22.594	-2336									2	4	3.146	-1022	14.3	-511
4	8	0.858	-365	23.452	-2701
4	9	5.434	292	28.886	-2409
4	10	4.862	-1241	33.748	-3650
4	11	11.44	-657	45.188	-4307
4	12	3.146	365	48.334	-3942
4	13	7.15	-1022	55.484	-4964
4	14	14.014	0	69.498	-4964
4	15	1.144	-438	70.642	-5402
4	16	6.578	0	77.22	-5402
4	17	1.43	-511	78.65	-5913
4	18	2.86	73	81.51	-5840
4	19	0.858	-219	82.368	-6059
4	20	18.018	-146	100.386	-6205
				0	0
3	1	21.45	146	21.45	146
3	2	2.288	219	23.738	365
3	3	2.288	-219	26.026	146
3	4	2.86	1606	28.886	1752
