# Supplementary material for: Kinesin-1, -2, and -3 motors use family-specific mechanochemical strategies to effectively compete with dynein during bidirectional transport
Source: eLife. 2022 Sep 20;11:e82228. doi: 10.7554/eLife.82228 (PMC9545524; doi:10.7554/eLife.82228)
Supplement: Figure 1—source data 1. [file elife-82228-fig1-data1.xlsx]

## Sheet: Fig.1D
DDB-Kin1 Sample Traces							DDB-Kin2 Sample Traces							DDB-Kin3 Sample Traces
Track	Segment #	Time	Distance	Time Plot	Dist Plot		Track	Segment #	Time	Distance	Time Plot	Dist Plot		Track	Segment #	Time	Distance	Time Plot	Dist Plot
		0	0	0	0						0	0						0	0
1	1	7.436	146	7.436	146		7	1	1.716	0	1.716	0		1	1	1.43	73	1.43	73
1	2	4.862	2117	12.298	2263		7	2	0.858	-511	2.574	-511		1	2	1.716	1241	3.146	1314
1	3	1.43	0	13.728	2263		7	3	2.288	0	4.862	-511		1	3	1.144	0	4.29	1314
1	4	3.718	1971	17.446	4234		7	4	0.858	-365	5.72	-876		1	4	2.86	1971	7.15	3285
1	5	1.43	292	18.876	4526		7	5	3.146	-73	8.866	-949		1	5	1.43	146	8.58	3431
1	6	1.43	0	20.306	4526		7	6	1.716	-365	10.582	-1314		1	6	2.002	1752	10.582	5183
1	7	1.716	803	22.022	5329									1	7	1.144	73	11.726	5256
1	8	1.144	73	23.166	5402						0	0		1	8	6.006	3212	17.732	8468
1	9	2.86	949	26.026	6351		3	1	2.002	-365	2.002	-365		1	9	2.002	73	19.734	8541
							3	2	3.432	0	5.434	-365		1	10	4.004	1971	23.738	10512
		0	0	0	0		3	3	8.866	-1168	14.3	-1533
3	1	18.018	-803	18.018	-803		3	4	3.146	0	17.446	-1533						0	0
3	2	6.292	-803	24.31	-1606		3	5	2.574	-292	20.02	-1825		1	1	6.006	146	6.006	146
3	3	5.434	-1825	29.744	-3431		3	6	1.43	0	21.45	-1825		1	2	3.146	-511	9.152	-365
3	4	5.148	-1095	34.892	-4526		3	7	1.43	-146	22.88	-1971		1	3	1.144	0	10.296	-365
3	5	3.146	-73	38.038	-4599									1	4	2.574	-876	12.87	-1241
3	6	8.008	-3212	46.046	-7811						0	0		1	5	1.43	0	14.3	-1241
3	7	2.574	0	48.62	-7811		1	1	4.576	365	4.576	365		1	6	1.144	-511	15.444	-1752
3	8	2.574	-584	51.194	-8395		1	2	13.442	73	18.018	438		1	7	2.574	-219	18.018	-1971
							1	3	9.152	2409	27.17	2847		1	8	4.29	-73	22.308	-2044
							1	4	5.434	0	32.604	2847
		0	0	0	0		1	5	2.288	730	34.892	3577						0	0
5	1	4.004	-1460	4.004	-1460		1	6	2.002	219	36.894	3796		3	1	7.722	219	7.722	219
5	2	2.002	0	6.006	-1460									3	2	3.146	803	10.868	1022
5	3	4.862	-1825	10.868	-3285						0	0		3	3	11.44	146	22.308	1168
5	4	4.862	-584	15.73	-3869		2	1	2.002	-730	2.002	-730		3	4	3.718	438	26.026	1606
5	5	1.43	-1168	17.16	-5037		2	2	2.288	0	4.29	-730		3	5	5.148	0	31.174	1606
5	6	1.43	-146	18.59	-5183		2	3	1.43	292	5.72	-438		3	6	2.002	-438	33.176	1168
5	7	15.73	-292	34.32	-5475		2	4	4.29	-292	10.01	-730		3	7	1.144	292	34.32	1460
5	8	8.294	-1095	42.614	-6570		2	5	1.144	-657	11.154	-1387		3	8	10.868	73	45.188	1533
5	9	1.43	-803	44.044	-7373		2	6	2.002	-73	13.156	-1460		3	9	1.43	-219	46.618	1314
5	10	1.144	0	45.188	-7373		2	7	1.43	292	14.586	-1168		3	10	1.716	365	48.334	1679
5	11	2.288	-1022	47.476	-8395		2	8	4.29	-876	18.876	-2044		3	11	6.292	73	54.626	1752
5	12	8.294	-219	55.77	-8614		2	9	2.574	0	21.45	-2044		3	12	3.718	-803	58.344	949
5	13	1.144	146	56.914	-8468		2	10	7.436	-1168	28.886	-3212		3	13	3.146	0	61.49	949
5	14	21.164	-146	78.078	-8614		2	11	1.144	292	30.03	-2920		3	14	9.438	-365	70.928	584
							2	12	2.574	0	32.604	-2920
							2	13	2.002	-876	34.606	-3796						0	0
		0	0	0	0		2	14	1.716	219	36.322	-3577		3	1	0.858	-438	0.858	-438
1	1	8.58	146	8.58	146		2	15	0.858	-438	37.18	-4015		3	2	2.288	-73	3.146	-511
1	2	10.868	1168	19.448	1314		2	16	1.716	0	38.896	-4015		3	3	2.574	-1095	5.72	-1606
1	3	3.432	-73	22.88	1241									3	4	1.716	0	7.436	-1606
1	4	6.006	438	28.886	1679						0	0		3	5	3.718	-1241	11.154	-2847
1	5	2.288	0	31.174	1679		1	1	0.286	1241	0.286	1241		3	6	3.718	-73	14.872	-2920
1	6	3.718	1095	34.892	2774		1	2	0.572	0	0.858	1241		3	7	11.154	-2117	26.026	-5037
1	7	10.582	219	45.474	2993		1	3	0.858	876	1.716	2117		3	8	10.01	-146	36.036	-5183
1	8	7.436	2847	52.91	5840		1	4	1.144	0	2.86	2117		3	9	2.86	-876	38.896	-6059
1	9	9.438	73	62.348	5913		1	5	1.43	803	4.29	2920		3	10	9.724	-219	48.62	-6278
1	10	2.574	1095	64.922	7008		1	6	1.716	0	6.006	2920
							1	7	2.002	1460	8.008	4380
																		0	0
														1	1	2.86	1898	2.86	1898
3	1	2.86	0	0	0						0	0		1	2	2.86	146	5.72	2044
3	2	0.858	-146	0.858	-146		1	1	5.148	0	5.148	0		1	3	1.144	949	6.864	2993
3	3	4.004	0	4.862	-146		1	2	18.018	730	23.166	730		1	4	4.862	73	11.726	3066
3	4	0.572	219	5.434	73		1	3	2.86	365	26.026	1095		1	5	4.862	803	16.588	3869
3	5	2.574	0	8.008	73		1	4	4.004	0	30.03	1095		1	6	3.432	0	20.02	3869
3	6	5.434	-1095	13.442	-1022		1	5	1.43	146	31.46	1241		1	7	10.01	1898	30.03	5767
3	7	2.288	73	15.73	-949		1	6	6.292	-365	37.752	876		1	8	2.288	0	32.318	5767
3	8	2.002	-730	17.732	-1679		1	7	14.3	219	52.052	1095		1	9	1.43	365	33.748	6132
3	9	1.43	-73	19.162	-1752
3	10	1.43	-1606	20.592	-3358						0	0
3	11	2.574	-1168	23.166	-4526		1	1	4.576	-584	4.576	-584						0	0
3	12	1.716	0	24.882	-4526		1	2	4.862	-146	9.438	-730		8	1	2.86	0	2.86	0
							1	3	22.022	-3066	31.46	-3796		8	2	3.146	-438	6.006	-438
														8	3	10.296	73	16.302	-365
				0	0						0	0		8	4	2.288	511	18.59	146
5	1	2.86	584	2.86	584		4	1	8.58	-1022	8.58	-1022		8	5	6.006	-657	24.596	-511
5	2	3.432	73	6.292	657		4	2	2.86	-1460	11.44	-2482		8	6	5.72	-73	30.316	-584
5	3	1.43	-1022	7.722	-365		4	3	7.15	-146	18.59	-2628
5	4	2.288	-219	10.01	-584		4	4	2.288	-1022	20.878	-3650
5	5	5.72	219	15.73	-365		4	5	8.58	-1168	29.458	-4818
5	6	1.144	365	16.874	0
5	7	12.584	365	29.458	365						0	0
5	8	1.716	365	31.174	730		9	1	5.148	0	5.148	0
5	9	20.306	146	51.48	876		9	2	3.432	-584	8.58	-584
							9	3	10.582	-146	19.162	-730
				0	0		9	4	2.574	-438	21.736	-1168
3	1	3.718	2409	3.718	2409		9	5	11.154	-73	32.89	-1241
3	2	1.43	73	5.148	2482
3	3	2.86	1460	8.008	3942
