# Supplementary material for: Kinesin-1, -2, and -3 motors use family-specific mechanochemical strategies to effectively compete with dynein during bidirectional transport
Source: eLife. 2022 Sep 20;11:e82228. doi: 10.7554/eLife.82228 (PMC9545524; doi:10.7554/eLife.82228)
Supplement: Figure 2—source data 1. [file elife-82228-fig2-data1.xlsx]

## Sheet: Fig. 2A-C
DDB-Kin and Unloaded Trace Velocities (nm/s)								Fast % of Plus Events
Unloaded DDB	Unloaded Kin1	DDB-Kin1	Unloaded Kin2	DDB-Kin2	Unloaded Kin3	DDB-Kin3		DDB-Kin1	DDB-Kin2	DDB-Kin3
-595.571	580	246.83	423.846	180.992	906.25	-27.9174		51.8106	28.9389	25.431
-510.49	685.455	-78.5368	193.333	43.8702	1126.86	-85.0816
-724.895	604.167	336.459	198.857	-248.864	1087.5	-14.1803
-65.0624	797.5	553.03	354.444	-600.298	659.091	225.216
-16.6464	638	404.138	154.667	-95.7168	986	1174.13
-787.005	761.25	-220.28	225.556	-155.983	1595	442.009
-822.455	676.667	-23.277	257.778	-120.905	638	-69.2189
-217.303	129.385	-163.146	255.882	191.434	1087.5	-209.432
-98.9725	522	387.776	290	-164.491	720	-59.7381
-11.602	652.5	510.49	203	319.056	1115.38	-119.646
207.386	538.571	663.636	326.25	74.9342	935.909	-56.0293
69.6122	725	357.343	348	-77.055	725	-72.9271
72.3828	580	446.678	326.25	-89.3357	1012.62	-19.2638
235.981	696	-32.4857	316.364	181.141	1015	-124.173
572.1	612.222	510.49	290	91.1588	870	-123.976
68.9851	628.333	492.258	326.25	274.879	1015	-209.665
31.4147	725	69.6122	372.857	-35.4507	1022.63	-10.6847
10.2098	676.667	446.678	334.615	-119.426	840.256	1.51032
-567.211	621.429	51.6951	464	-47.9783	1113.6	53.5699
-167.229	178.462	94.8052	241.667	-536.014	1074.71	-672.918
-612.587	621.429	189.07	322.222	-24.781	1097.86	-25.1473
-179.361	580	98.3756	178.462	85.0816	741.111	-111.67
-595.571	451.111	-48.618	326.25	255.245	1071.74	583.417
-446.678	652.5	-61.6108	348	319.056	803.077	729.271
-61.2587	580	51.049	372.857	134.339	828.571	87.0153
-88.0154	427.368	130.735	406	328.172	883.81	-264.361
-111.486	348	542.395	290	-25.5245	1095.56	-83.4454
-125.773	497.143	382.867	261	-586.118	904.627	1294.46
-881.755	290	255.245	225.556	-59.6366	833.75	647.929
-106.558	580	-77.4338	217.5	-742.53	603.514	0
-192.852	490.769	226.884	331.429	-287.15	656.765	-1.48398
-869.212	580	567.211	362.5	-48.618	1118.57	-478.584
-213.572	527.273	85.8767	412.105	-43.8299	966.667	-45.2854
-35.8238	870	-87.7404	290	251.93	1087.5	-91.6263
-73.7374	602.308	542.395	290	54.3074	783	658.696
-109.391	471.25	565.978	235.625	106.847	797.5	297.786
-123.755	464	12.5825	193.333	-24.9019	1008.1	-116.644
-54.0518	676.667	638.112	193.333	-190.352	731.042	-343.599
-191.434	531.667	-25.7823	223.077	-99.5455	567.391	99.1715
-816.783	628.333	-33.8276	464	-124.173	1643.33	-412.318
-71.7876	580	287.15	124.286	225.793	910	-156.729
-289.277	628.333	567.211	241.667	140.385	744.248	-135.544
-382.867	580	542.395	124.286	79.2139	789.444	61.0368
-136.738	621.429	392.684	225.556	-64.0973	245.385	765.734
-109.391	522	299.913	483.333	-62.6917	856.512	59.8722
-52.5504	580	-110.326	210.909	-41.4358	684.4	-54.1428
-1276.22	435	467.949	290	133.899	477.647	-9.93468
-386.734	628.333	561.538	338.333	49.0855	953.197	-100.275
-535.391	483.333	16.1207	116	113.442	896.126	459.441
-141.803	870	358.722	193.333	22.8199	725	43.3434
-95.7168	621.429	255.245	237.273	27.0259	972.037	-57.21
-118.284	662.857	498.335	203	68.0653	943.772	-161.207
-61.6108	696	174.313	362.5	117.275	896.977	8.26704
-457.314	797.5	280.769	290	306.294	930.698	-24.8755
-98.1711	676.667	233.05	238.824	170.163	1141.29	583.417
-244.61	685.455	593.272	362.5	-39.2684	957.674	245.428
-133.337	497.143	557.977	435	-77.9915	870	245.035
-701.923	497.143	510.49	316.364	-127.622	741.111	638.112
-324.23	451.111	-357.343	322.222	-21.8781	108.75	185.633
-183.006	638	270.714	341.176	-17.975	928	1106.06
-41.0215	676.667	569.392	377	-125.459	1160	58.5808
-324.857	612.222	-18.6116	322.222	-123.222	1020.8	-696.122
-680.653	557.692	92.4162	257.778	240.23	1042.19	-28.605
-69.6122	418.889	197.815	314.167	101.699	950.308	174.031
-358.238	580	616.841	290	-32.4857	892.308	-180.432
-638.112	580	233.974	260.508	303.103	852.941	-12.8695
-153.147	580	373.05	290	255.245	1015	-114.675
-756.618	688.75	-26.2752	312.308	228.84	870	-68.7197
-282.989	557.692	-484.965	471.25	214.943	784.074	37.6591
-287.15	557.692	478.584	237.273	189.375	1208.33	87.8711
-337.288	870	81.4143	237.273	204.196	764.545	357.343
-23.4888	464	344.58	217.5	180.173	854.324	45.8132
-492.258	462.885	-134.003	471.25	162.428	918.333	30.3863
-336.459	386.667	61.6108	696	158.009	614.8	135.357
-453.768	652.5	146.959	263.636	315.302	780.769	131.072
-838.661	435	-82.5792	340.435	147.773	665.294	-735.705
-245.428	825.385	647.929	178.462	65.3676	764.545	-893.357
-212.704	773.333	601.648	290	25.8944	628.333	-376.15
-710.546	696	206.159	290	-193.634	704.286	-70.9013
-127.622	1111.67	544.522	238.824	619.88	1189	-978.438
-619.104	331.429	565.978	386.667	50.1374	942.5	325.657
-282.398	725	221.212	386.667	-13.9358	1256.67	397.047
-820.43	538.571	115.686	362.5	-72.4343	773.333	510.49
-467.949	797.5	405.389	227.857	-148.207	1160	179.537
-44.6678	418.889	60.0576	232	-179.617	894.167	612.587
-749.781	725	483.902	272.941	-165.158	870	-72.6609
-71.7876	538.571	569.392	184.545	-41.8434	1595	-24.349
-863.905	685.455	317.122	316.364	288.538	870	-30.442
-629.604	612.222	459.441	362.5	-865.613	789.444	122.305
-266.847	210.909	188.075	217.5	-62.0866	843.636	21.4943
-143.396	406	453.768	379.231	-45.4545	814.762	-40.8392
-1020.98	870	765.734	245.385	-218.781	1341.25	-22.1533
-708.59	628.333	446.678	314.167	41.1685	870	438.055
-829.545	531.667	-7.09013	580	255.245	844.107	-126.867
-323.31	455.714	117.275	459.167	-691.481	894.167	-72.9271
-487.285	638	-18.907	1015	211.237	563.889	130.125
-510.49	580	-60.6206	207.143	99.2618	756.522	-32.6476
-777.336	446.154	-27.0714	302.083	-163.555	815.932	285.274
-102.098	538.571	401.099	362.5	-34.1316	740.792	-1217.32
-121.821	145	510.49	290	188.075	551	690.106
-1233.68	621.429	638.112	322.222	212.704	606.977	-1108.99
-565.185	22.5243	-134.232	241.667	23.9292	857.206	-32.6476
-606.206	662.857	124.584	261	127.622	1033.91	-37.3529
-464.081	580	244.61	257.778	76.1256	900.526	242.483
-95.3324	652.5	440.877	331.429	-155.774	894.421	-48.7968
-911.027	522	-46.8339	263.636	-494.953	1136.8	-139.973
-431.953	580	-45.3768	290	149.956	914.13	510.49
-526.442	638	-10.4609	290	55.488	1260	69.6122
-612.587	635.769	-53.176	145	-170.163	1046.07	474.026
-146.39	580	474.026	225.556	-354.507	1082.67	90.0864
-183.776	609	433.916	507.5	-210.202	665.294	69.6122
-720.691	497.143	-79.0043	348	287.15	934.444	737.374
-323.31	209.444	204.196	317.619	260.508	1015	626.51
-35.8238	528.824	382.867	319	-62.0866	998.889	115.272
-808.275	628.333	-193.492	497.143	-39.5022	836.279	34.6629
-249.573	580	370.517	507.5	-52.5504	1015	517.206
-235.981	562.941	574.301	181.25	191.434	870	-40.4539
-536.014	543.75	382.867	248.571	11.9273	913.5	-86.9515
-455.002	543.75	612.587	217.5	-735.105	899	-236.825
-217.431	621.429	69.0662	225.556	-239.775	797.5	87.5125
-267.399	483.333	-89.6806	435	-465.446	874.531	-71.6477
-104.609	761.25	-28.6499	314.167	-216.473	902.222	-99.8784
-24.3984	547.778	510.49	207.143	-163.189	851.087	-99.8784
-146.63	435	670.017	483.333	-535.391	928	-62.0866
-188.881	553.636	533.694	198.421	-24.6019	783	-79.2139
-459.441	725	77.6832	174	-43.9707	920.123	-82.7821
	507.5	17.1114	455.714	78.5368	784.706	-79.764
	725	-49.6309	372.857	-102.86	980	-49.0855
	386.667	376.79	435	108.615	1005.33	148.893
	421.818	49.8039	543.75	141.803	821.039	601.648
	870	-34.8061	203	69.6122	943.13	-55.6898
	435	16.5266	386.667	74.1033	808.162	986.946
	638	623.932	348	-37.1265	953.815	153.147
	507.5	333.782	217.5	-29.2904	901.752	729.271
	676.667	-19.4843	319	159.528	784.706	-626.51
	531.667	-52.5504	271.875	-42.5408	968.723	-22.6884
	386.667	114.188	241.667	-58.2624	683.22	-40.8392
	331.429	104.418	290	-104.765	657.333	-146.766
	362.5	-311.966	261	-185.633	966.667	969.93
	754	-55.488	367.333	-91.1588	682.353	626.51
	638	-79.5025	225.556	91.6263	825.385	1191.14
	483.333	20.0192	257.778	-804.408	1175.26	176.708
	425.333	393.965	251.333	-272.261	909.545	105.101
	580	-90.3992	238.824	-145.854	908.667	-67.1697
	531.667	260.794	290	-39.9626	821.667	-110.606
	725	10.4182	184.545	-27.7232	939.048	-40.3018
	754	542.395	203	158.252	773.886	-311.966
	580	-89.8083	290	26.1789	597.059	490.07
	704.286	-20.4196	290	4.0196	837.778	82.6849
	870	110.767	95.2857	-719.326	775.75	482.129
	130.784	-18.709	257.778	-68.4352	960.222	59.1093
	662.857	-43.9656	248.571	-276.128	558.909	462.631
	580	233.675	130.968	-838.661	767.215	-70.5996
	870	584.227	203	-102.098	754	111.486
	483.333	-93.5897	638	241.811	984.242	147.773
	435	-24.1276	580	196.342	961.579	22.0039
	507.5	-6.0294	348	-49.4022	773.333	-110.976
	725	561.538	331.429	-77.9287	808.699	-217.431
	580	-107.038	435	139.224	1160	-20.4196
	773.333	765.734	369.091	141.803		-157.256
	580	-10.2098	319	220.039		-66.7563
	464	-221.952	314.167	-24.8755		701.923
	522	467.949	342.727	-246.737		-153.147
	410.833	510.49	386.667	316.503		-346.404
	442.632	-103.653	227.857	299.635		-670.017
	773.333	525.504	248.571	-376.79		45.9441
	372.857	31.1274	263.636	217.892		765.734
	644.444	510.49	290	255.245		697.015
	580	595.571	326.25	123.869		903.992
	952.857	455.794	290	-153.147		-81.4788
	1885	-163.471	263.636	-152.365		-132.349
		530.124	290	245.791		656.344
		121.241	290	90.8826		10.6352
		446.678	290	210.465		440.877
		590.253	386.667	-518.224		1123.08
		528.721	290	182.318		238.598
		77.3469	290	186.525		82.5792
		-106.352	348	217.431		935.897
		-87.0153	241.667	178.671		17.0163
		-788.938	414.286	173.202		-13.0061
		233.05	232	306.294		-16.2922
		268.679	290	255.245		-57.4301
		394.469	348	408.392		420.403
		452.479	580	-301.653		-24.0448
		-51.6567		-278.449		-273.921
		-37.536		-255.245		176.031
		465.446		-76.5734		-2.61343
		322.414		-85.7966		973.121
		355.123		148.893		1349.15
		9.33822		21.0367		173.314
		528.721		-103.285		680.653
		850.816		-98.6173		-140.385
		546.953		-28.3605		-108.479
		482.129		283.605		-105.619
		37.9221		243.09		-92.3226
		14.5854		-820.43		-136.275
		553.03		-211.666		-74.021
		574.301		-93.3822		-28.2733
		561.538		-647.929		1052.88
		595.571		-558.348		1052.88
		28.1956		-765.734		28.7288
		429.886		-654.065		-111.261
		-35.7343		288.538		-223.339
		-15.7558		255.245		-239.002
		580.682		212.704		-267.472
		510.49		-82.1975		-346.871
		-554.497		-368.687		-64.5124
		414.773		-177.253		-131.269
		663.636		-113.442		-75.3181
		273.157		-37.6591		-66.793
		663.636		-23.5094		-49.8039
		510.49		-918.881		1072.03
		461.232		-15.0144		56.7211
		382.867		-22.0582		57.6359
		187.179		-66.8498		553.03
		551.329		212.704		175.025
		-71.9921		-242.483		306.294
		-15.4471		-978.438		1068.84
		553.03		107.988		406.071
		510.49		-182.318		-31.9056
		619.88		-194.914		487.285
		25.3554		-35.8238		-169.119
		542.395		-83.6516		28.0769
		437.562		-58.3417		672.918
		127.622		-20.5107		-13.4339
		436.386		-40.3018		-104.418
		42.7333		65.9382		3.4261
		-98.6453		-187.822		531.76
		561.538		-99.8784		709.013
		-21.723		-27.8839		692.807
		127.622		42.3392		-141.056
		-17.6389		-35.7343		136.131
		237.842		-425.408
		-692.807		-45.5794
		638.112		-5.48913
		-143.396		-17.6902
		420.403		-23.2041
		-38.9356		-102.098
		-140.645		-37.814
		288.538		263.753
		726.466		34.261
		67.034		-55.6898
		587.063		-68.0653
		63.1533		-90.5707
		237.013		152.061
		546.953		157.074
		-15.7558		-30.7742
		587.063		-22.1078
		40.3018		255.245
		-52.9455		-765.734
		-102.098		-60.3306
		-28.818		-476.457
		-56.9127		-24.8468
		510.49		-30.3863
		88.9844		-168.088
		-45.9441		-95.176
		122.074		228.377
		638.112		-348.061
		8.8851		-52.3579
		467.949		-179.469
		395.629		111.67
		492.886		-16.0531
		574.301		-108.392
		397.047		-134.339
		-638.112		85.0816
		638.112		-35.8938
		65.6344		158.009
		603.306		244.147
		510.49		97.2361
		55.6898		-588.308
		294.949		170.163
		35.6487		-57.6359
		464.081		9.63188
		63.8112		74.3626
		16.2922		180.173
		689.161		187.179
		510.49		-126.121
		228.377		98.1711
		18.8075		319.056
		-11.7805		-40.0675
		-23.6338		319.056
		293.341		196.342
		-89.3357		182.318
		227.897		-127.622
		107.77		182.318
		606.206		226.884
		13.7439		171.493
		141.494		183.457
		-11.2372		-631.395
		230.936		-382.867
		583.417		-86.3328
		558.348		-36.4635
		281.649		247.663
		542.395		-58.4936
		-50.048		-687.863
		262.537		-95.3945
		510.49		328.172
		574.301		-293.531
		446.678		-46.4081
		510.49		-620.709
		469.098		4.35076
		-29.1708		319.056
		434.861		283.605
		425.408		-590.253
		842.308		194.914
		510.49		-135.229
		450.432		34.965
		510.49		-143.295
		507.131		21.9565
		-136.467		-270.259
		-465.446		-187.445
		208.363
		-63.8112
		580.102
		714.685
		638.112
		33.5848
		492.258
		437.562
		612.587
		623.932
		52.2092
		303.103
		-11.1582
		-19.6342
		-16.4674
		43.8107
		444.399
		-18.6764
		510.49
		536.014
		73.8866
		446.678
		282.113
		136.961
		935.897
		670.017
		-14.5025
		455.794
		255.245
		401.099
		505.763
		296.917
		89.3357
		204.196
		389.584
		-439.258
		467.949
		250.518
		510.49
		492.258
		17.6031
		435.418
		478.584
		546.953
		467.949
		154.97
		348.429
		638.112
