# Supplementary material for: Kinesin-1, -2, and -3 motors use family-specific mechanochemical strategies to effectively compete with dynein during bidirectional transport
Source: eLife. 2022 Sep 20;11:e82228. doi: 10.7554/eLife.82228 (PMC9545524; doi:10.7554/eLife.82228)
Supplement: Figure 3—source data 1. [file elife-82228-fig3-data1.xlsx]

## Sheet: Fig. 3A
Fast vs Unloaded RL (nm)
Kin1	DDB-Kin1	KIn2	DDB-Kin2	Kin3	DDB-Kin3
1044	2117	1102	2847	4350	1679
1508	949	348	1095	7888	10366
1450	2774	1392	1095	870	1168
638	5767	638	1606	1450	1460			Fit	Kin1	DDB-Kin1	KIn2	DDB-Kin2	Kin3	DDB-Kin3
638	1606	464	1022	1972	5183		Vel	Median	580	511	290	214	894	645
1218	949	406	730	1276	2409			Mean	584	493	308	227	890	689
812	1022	464	730	638	5840		% Diff		13.7394		26.2528		25.2183
1682	2044	870	730	870	4599		RL	Median	812	2044	580	1387	4060	2409
522	2336	406	657	4176	657			cdf	604	1940	401	1250	5590	2580
522	3942	406	5548	2900	7227		% Diff		186.458		175.429		47.2556
754	1022	522	1679	4118	4672
870	1241	348	3212	580	2555
812	876	522	2336	12354	949
696	949	696	1314	812	1022
1102	1460	870	584	1044	2701
754	11169	522	1168	2030	1022
1450	3723	522	1387	3886	1022
1218	1095	870	876	6554	1752
870	7227	464	1898	5568	9271
464	1460	290	2336	3654	1387
870	3723	1160	1679	3074	10658
464	2920	464	1168	1334	1168
812	3431	522	876	4930	1898
1566	803	348	1533	2088	3796
580	803	522	949	2320	1971
1624	3796	406	1533	3712	5621
348	511	580	803	1972	2409
696	2993	522	1241	12122	4234
290	1606	406	1898	6670	2920
812	6278	696	438	4466	1387
1276	13724	928	1752	13398	1971
464	3066	870	2044	1566	2044
1160	2555	1566	730	580	3504
522	2117	754	3358	1740	2482
1566	2117	406	3431	3132	2117
754	1387	754	6570	1914	7227
464	2190	348	7227	4234	1314
812	1971	464	1533	7018	5183
638	2409	580	730	2610	6205
754	2409	928	1095	986	1314
580	4672	522	4526	5278	1387
1508	3723	580	1314	16820	4818
812	5913	174	1460	2842	803
870	6643	406	438	1914	2044
1044	2117	580	4380	7366	4453
1624	5986	464	1825	3422	2701
522	1314	464	2263	1624	2336
754	2336	406	1971	23258	2409
870	1095	232	5110	19894	2409
870	2044	580	730	2320	1533
870	803	522	1898	10498	1898
928	2774	406	3431	21518	438
696	1095	290	2920	15428	4891
638	1387	406	1387	8004	2555
2842	949	812	1679	7076	3066
1508	2482	580	1022	16472	6351
1392	5913	348	1387	1044	1825
696	3285	696	438	1334	1825
812	3942	580	511	1566	4161
1276	2190	1160	1168	928
812	1752	754	511	1160
1102	1606	580	730	5104
1450	1533	928	1460	6670
754	3358	754	1898	12354
348	2263	464	1095	2320
696	1606	3074	730	8700
812	1241	1044	730	812
1102	5183	812	2263	870
1450	3431	754	2044	4234
1450	1241	522	584	1450
696	7519	522	438	6728
2320	803	348	2482	6322
4814	876	754	949	6612
928	3212	696	1606	3074
522	1898	580	730	2030
1044	2555	1566	1752	2262
2146	1314	464	803	1682
928	2044	638	730	3770
1392	1825	928	1095	986
1334	11826	812	730	2378
928	1022	696	730	754
1450	2701	464	2920	754
754	2117	580	2336	1856
638	5840	638	3139	1392
754	1241	464	1679	2146
580	5694	928	7154	870
754	2263	406	657	638
1508	1752	1392	1095	3306
1102	2336	580	730	2842
464	2117	696	3066	3712
406	1460	986		3422
1392	3285	638		2146
2262	1241	754		4176
2552	1898	1856		9454
638	1314	1102		4292
638	803	812		4060
1160	1533	580		6960
1160	2336	1450		9628
754	6643	580		14964
754	1314	2610		1102
870	1898	580		5220
464	949	290		11658
928	4453	522		4756
812	949	464		6844
1566	730	928		16994
522	7519	580		5684
696	2628	348		8410
638	3942	812		7308
3306	1898	232		5858
812	1898	406		3248
1218	1241	406		2262
696	1241	348		3364
754	876	1334		9338
1798	3869	638		3596
1508	803	696		7192
696	730	406		6090
1914	2044	290		696
870	1898	348		3654
870	2701	522		1798
870	5037	406		638
870	2190	870		11194
1218	1679	754		3248
986	1168	580		7830
696	1460	870		6496
1218	1606	754		1566
580	2263	174		14906
1218	4088	638		8004
580	1971	522		11368
928	3066	522		3016
928	2555	870		12644
870	1898	406		21692
522	1022	464		21982
638	3796	348		33002
406	1460	522		24708
812	1971	638		8004
638	1898	870		18212
464	5621	290		8062
464	1387	464		1972
580	1168	522		4060
754	2555	1102		16240
638	4672	406		6438
870	1241	464		4466
1276	2628	754		4002
580	2336	812		2726
638	657	406		986
1160	511	406		7888
1508	438	406		27086
928	4964	406		2030
986	6716	580		12064
696	2555	1334		6206
1334	2409	464		8642
928	1168	348		6148
580	2190	812		12122
522	1460	406		754
580	11023	638		6496
1218	1825	1044		10962
406	1022	696		20416
580	730	464		19894
580	1971	522		1856
464	3504	812
464	2628	638
464	1606	754
522	2774	754
986	14235	464
1682	730	638
928	3066	696
522	1533	580
1160	1533	406
696	1606	522
1334	1533	348
754	1825	580
	1314	348
	2409	348
	7811	406
	4161	464
	2117	348
	803	464
	3869	696
	730	290
	1971	580
	2117	696
	2190	290
	1095	348
	803	348

## Sheet: Fig.3B
Fast vs Unloaded Velocity (nm/s)
Kin1	DDB-Kin1	KIn2	DDB-Kin2	Kin3	DDB-Kin3
580	336.5	423.846	181	906.25	1174.1
685.455	553	193.333	191.4	1126.86	442
604.167	404.1	198.857	319.1	1087.5	583.4
797.5	387.8	354.444	181.1	659.091	729.3			Fit	Kin1	DDB-Kin1	KIn2	DDB-Kin2	Kin3	DDB-Kin3
638	510.5	154.667	274.9	986	1294.5		Vel	Median	580	511	290	214	894	645
761.25	663.6	225.556	255.2	1595	647.9			Mean	584	493	308	227	890	689
676.667	357.3	257.778	319.1	638	658.7		% Diff		13.7394		26.2528		25.2183
129.385	446.7	255.882	134.3	1087.5	297.8		RL	Median	812	2044	580	1387	4060	2409
522	510.5	290	328.2	720	765.7			cdf	604	1940	401	1250	5590	2580
652.5	492.3	203	251.9	1115.38	459.4		% Diff		186.458		175.429		47.2556
538.571	446.7	326.25	225.8	935.909	583.4
725	542.4	348	140.4	725	638.1
580	382.9	326.25	133.9	1012.62	1106.1
696	255.2	316.364	306.3	1015	357.3
612.222	567.2	290	170.2	870	325.7
628.333	542.4	326.25	240.2	1015	397
725	566	372.857	303.1	1022.63	510.5
676.667	638.1	334.615	255.2	840.256	612.6
621.429	287.2	464	228.8	1113.6	438.1
178.462	567.2	241.667	214.9	1074.71	285.3
621.429	542.4	322.222	189.4	1097.86	690.1
580	392.7	178.462	204.2	741.111	510.5
451.111	299.9	326.25	180.2	1071.74	474
652.5	467.9	348	162.4	803.077	737.4
580	561.5	372.857	158	828.571	626.5
427.368	358.7	406	315.3	883.81	517.2
348	255.2	290	147.8	1095.56	601.6
497.143	498.3	261	619.9	904.627	986.9
290	280.8	225.556	288.5	833.75	729.3
580	593.3	217.5	255.2	603.514	969.9
490.769	558	331.429	211.2	656.765	626.5
580	510.5	362.5	188.1	1118.57	1191.1
527.273	270.7	412.105	212.7	966.667	490.1
870	569.4	290	127.6	1087.5	482.1
602.308	616.8	290	150	783	462.6
471.25	373.1	235.625	287.2	797.5	701.9
464	478.6	193.333	260.5	1008.1	765.7
676.667	344.6	193.333	191.4	731.042	697
531.667	647.9	223.077	141.8	567.391	904
628.333	601.6	464	159.5	1643.33	656.3
580	544.5	124.286	158.3	910	440.9
628.333	566	241.667	241.8	744.248	1123.1
580	405.4	124.286	196.3	789.444	935.9
621.429	483.9	225.556	139.2	245.385	420.4
522	569.4	483.333	141.8	856.512	973.1
580	317.1	210.909	220	684.4	1349.2
435	459.4	290	316.5	477.647	680.7
628.333	453.8	338.333	299.6	953.197	1052.9
483.333	765.7	116	217.9	896.126	1052.9
870	446.7	193.333	255.2	725	1072
621.429	401.1	237.273	245.8	972.037	553
662.857	510.5	203	210.5	943.772	306.3
696	638.1	362.5	182.3	896.977	1068.8
797.5	440.9	290	186.5	930.698	406.1
676.667	474	238.824	217.4	1141.29	487.3
685.455	433.9	362.5	178.7	957.674	672.9
497.143	382.9	435	173.2	870	531.8
497.143	370.5	316.364	306.3	741.111	709
451.111	574.3	322.222	255.2	108.75	692.8
638	382.9	341.176	408.4	928
676.667	612.6	377	148.9	1160
612.222	510.5	322.222	283.6	1020.8
557.692	670	257.778	243.1	1042.19
418.889	533.7	314.167	288.5	950.308
580	376.8	290	255.2	892.308
580	623.9	260.508	212.7	852.941
580	333.8	290	212.7	1015
688.75	394	312.308	263.8	870
557.692	260.8	471.25	152.1	784.074
557.692	542.4	237.273	157.1	1208.33
870	584.2	237.273	255.2	764.545
464	561.5	217.5	228.4	854.324
462.885	765.7	471.25	158	918.333
386.667	467.9	696	244.1	614.8
652.5	510.5	263.636	170.2	780.769
435	525.5	340.435	180.2	665.294
825.385	510.5	178.462	187.2	764.545
773.333	595.6	290	319.1	628.333
696	455.8	290	319.1	704.286
1111.67	530.1	238.824	196.3	1189
331.429	446.7	386.667	182.3	942.5
725	590.3	386.667	182.3	1256.67
538.571	528.7	362.5	226.9	773.333
797.5	268.7	227.857	171.5	1160
418.889	394.5	232	183.5	894.167
725	452.5	272.941	247.7	870
538.571	465.4	184.545	328.2	1595
685.455	322.4	316.364	319.1	870
612.222	355.1	362.5	283.6	789.444
210.909	528.7	217.5	194.9	843.636
406	850.8	379.231		814.762
870	547	245.385		1341.25
628.333	482.1	314.167		870
531.667	553	580		844.107
455.714	574.3	459.167		894.167
638	561.5	1015		563.889
580	595.6	207.143		756.522
446.154	429.9	302.083		815.932
538.571	580.7	362.5		740.792
145	510.5	290		551
621.429	414.8	322.222		606.977
22.5243	663.6	241.667		857.206
662.857	273.2	261		1033.91
580	663.6	257.778		900.526
652.5	510.5	331.429		894.421
522	461.2	263.636		1136.8
580	382.9	290		914.13
638	551.3	290		1260
635.769	553	145		1046.07
580	510.5	225.556		1082.67
609	619.9	507.5		665.294
497.143	542.4	348		934.444
209.444	437.6	317.619		1015
528.824	436.4	319		998.889
628.333	561.5	497.143		836.279
580	638.1	507.5		1015
562.941	420.4	181.25		870
543.75	288.5	248.571		913.5
543.75	726.5	217.5		899
621.429	587.1	225.556		797.5
483.333	547	435		874.531
761.25	587.1	314.167		902.222
547.778	510.5	207.143		851.087
435	638.1	483.333		928
553.636	467.9	198.421		783
725	395.6	174		920.123
507.5	492.9	455.714		784.706
725	574.3	372.857		980
386.667	397	435		1005.33
421.818	638.1	543.75		821.039
870	603.3	203		943.13
435	510.5	386.667		808.162
638	294.9	348		953.815
507.5	464.1	217.5		901.752
676.667	689.2	319		784.706
531.667	510.5	271.875		968.723
386.667	293.3	241.667		683.22
331.429	606.2	290		657.333
362.5	583.4	261		966.667
754	558.3	367.333		682.353
638	281.6	225.556		825.385
483.333	542.4	257.778		1175.26
425.333	262.5	251.333		909.545
580	510.5	238.824		908.667
531.667	574.3	290		821.667
725	446.7	184.545		939.048
754	510.5	203		773.886
580	469.1	290		597.059
704.286	434.9	290		837.778
870	425.4	95.2857		775.75
130.784	842.3	257.778		960.222
662.857	510.5	248.571		558.909
580	450.4	130.968		767.215
870	510.5	203		754
483.333	507.1	638		984.242
435	580.1	580		961.579
507.5	714.7	348		773.333
725	638.1	331.429		808.699
580	492.3	435		1160
773.333	437.6	369.091
580	612.6	319
464	623.9	314.167
522	303.1	342.727
410.833	444.4	386.667
442.632	510.5	227.857
773.333	536	248.571
372.857	446.7	263.636
644.444	282.1	290
580	935.9	326.25
952.857	670	290
1885	455.8	263.636
	255.2	290
	401.1	290
	505.8	290
	296.9	386.667
	389.6	290
	467.9	290
	250.5	348
	510.5	241.667
	492.3	414.286
	435.4	232
	478.6	290
	547	348
	467.9	580
	348.4
	638.1

## Sheet: Fig. 3C
Slow Trace Durations (sec)
DDB-Kin1	DDB-Kin2	DDB-Kin3
26	18.3	18.3
11.2	11.4	12
20.9	15.4	46.3
90.9	25.2	9.7
27.7	10.3	16.9
15.7	10.9	11.2
15.7	12.9	13.4
22.6	31.2	9.2
10	15.2	11.7
7.7	22.9	20
27.5	8	30.3
12	51.5	10.6
99.5	31.2	10
25.7	38	8
23.5	2.9	61.5
25.5	29.5	48.3
18	6.9	23.2
30.6	45.8	6.3
9.2	15.4	58.1
40.6	30.6	9.2
28.3	3.1	12.6
71.2	6.9	8
78.1	12	14.9
27.2	28.3	44.6
11.7	13.4	98.4
19.7	12.3	4.6
12.9	82.1	17.7
27.5	16.9	22.3
16.6	28.6	53.2
11.4	10.6	14.9
10.3	16.6	44.9
19.4	63.8	7.4
5.7	16.3	16.3
33.2	44	41.5
11.4	14.9	26.3
16.6	18	23.2
9.4	86.4	9.4
9.7	24.3	95.5
7.4	8.6	8
4.3	21.2	15.2
39.8	22.3	16.6
29.2	10.3	16.3
10.9	13.7	70.6
51.5	20	67.5
21.2	60.9	7.4
38.6	16.9	14.3
22.9	8.3	9.4
37.8	36.6	17.4
71.8	15.7	6.3
24	23.5	33.2
6.9	39.5	18.9
31.2	24.9	16.6
12.9	16	34
34.9	99.5	19.7
20.6	63.5	7.4
12	8.9	17.4
14.3	7.7	17.4
17.7	4.9	11.2
24.3	17.4	12
52.9	6.6	18.9
28	10.6	31.7
13.2	20.9	4.9
51.2	2	4.6
10.3	17.7	5.4
11.7	15.7	10.3
12.6	5.1	1.7
39.8	29.5	33.7
37.5	49.2	39.2
19.4	64.1	86.9
10.9	16.3	62.3
6.3	38.9	13.7
7.7	32.9	27.2
6.6	13.2	14.3
17.4	11.2	75.8
14.6	5.1	48.3
13.7	9.7	28
28	10.6	14.6
15.4	24	24.6
14.3	9.7	3.7
30.3	30.6	8.3
54.6	7.2	24.6
59.8	9.4	11.7
20.3	4.9	5.7
8.6	22.6	19.4
57.5	34.9	8.9
36.3	11.7	15.7
8.9	23.7	4.9
21.5	68.1	9.4
6.6	14.9	17.7
56.3	38.3	23.2
23.5	13.4	75.8
50.9	9.4	26
11.4	8.9	27.7
9.4	15.7	10
17.2	17.4	16.3
12.6	13.7	6.6
3.1	26.3	19.7
13.2	38.3	10.6
24	6.3	24.9
29.2	8	21.2
46.9	11.2	9.2
50.1	9.4	14.9
30	4.3	6.9
49.2	14	15.7
14.3	56.6	8.6
23.2	76.4	3.1
8.3	22.3	38.6
4.3	72.6	7.2
11.2	6.3	11.4
99.2	39.5	3.7
43.2	31.5	4.9
7.4	2	16.3
63.2	7.2	8.6
59.2	17.7	10.9
13.4	64.6	2.6
25.7	67.5	20.3
70.4	8.6	27.2
12.6	6	13.4
2	19.4	24.9
25.5	11.4	10.9
16.9	56.1	16.6
14	37.8	6.6
28.3	9.4	7.7
27.7	3.1	7.2
8	6.3	92.4
23.2	3.1	18.6
10.9	11.4	7.2
92.4	34	4
8.6	52.1	4.6
53.2	61.5	14.3
42.3	12.6	87.8
31.2	33.5	7.7
14.3	4	13.7
13.2	23.5	13.2
90.4	11.7	19.4
5.7	3.7	30
10	4.6	44.9
15.7	6	53.8
51.2	4.6	11.4
8	16.9	78.9
40.3	10.3	23.5
5.4	10.3	8.3
27.2	7.7	83.8
37.2	17.4	23.2
15.4	21.7	28.6
45.8	1.4	11.4
8	29.2	16.6
64.4	46.3	13.4
37.2	12	33.7
26.3	5.7	28.6
45.5	1.7	93
24	14.9	66.1
14.6	32	11.2
20	15.7	13.7
28.9	32.6	31.5
4.9	34	47.8
14	20	11.2
22.9	32	26
32.6	21.7	10
12.6	34.3	69.8
52.3	15.2	30.6
18.6	13.2	23.5
17.7	68.1	20.6
38.3	60.3	26.6
11.7	42.9	30
10.9	5.1	48
23.5	32	46.6
25.2	79.8	28.6
28.6	28.9	38
2.9	12.6	12.6
12.3	5.7	42.6
33.2	15.4	10.9
16	42.6	8.6
	15.7
	12.9
	8.9
	40.3
	36.3
	2
	15.7
	4.3
	32.3
	24
	11.7
	16.9
	12.6
	11.2
	18.3
	4.6
	45.5
	20.9
	16.3
	4.3
	18.3
	6
	23.5
	35.5
	15.2
	36.3
	24.3
	3.7
	49.2
	8.6
	10.9
	2.3
	19.4
	10
	27.5
	16.9
	28.3
	5.7
	18.9
	12.6
	50.3
	13.7
	43.2
	62.6
	16.3
	26.6
	24.3
	18.3

## Sheet: Fig. 3D
Fast Trace Durations (sec)
DDB-Kin1	DDB-Kin2	DDB-Kin3
6.3	15.7	1.4
1.7	5.7	23.5
6.9	3.4	2
14.9	8.9	2
3.1	3.7	4
1.4	2.9	3.7
2.9	2.3	8.9
4.6	5.4	15.4
4.6	2	0.9
8	22	15.7
2.3	7.4	8
2.3	22.9	4
2.3	17.4	0.9
3.7	4.3	2.9
2.6	3.4	8.3
20.6	4.9	2.6
6.6	4.6	2
1.7	3.4	2.9
25.2	8.3	21.2
2.6	10.9	4.9
6.9	8.9	15.4
7.4	5.7	2.3
11.4	4.9	4
1.7	9.4	5.1
1.4	6	3.1
10.6	4.9	10.9
2	5.4	4
6	2	4.3
5.7	6.6	4
10.6	1.7	1.4
24.6	8.3	3.1
6	10.9	1.7
9.4	3.4	7.2
3.7	26.3	5.1
3.4	22.9	4.6
3.7	22.9	10.3
4.6	27.7	1.7
5.7	8	7.4
3.7	5.1	6.9
4	6.9	2
8.6	28.6	3.1
6.6	5.4	4.3
14.6	7.4	0.9
13.7	3.1	4.9
3.7	30.9	4.6
18.9	8.3	2
2.9	7.2	3.4
5.1	6.6	2.3
1.4	23.5	2.3
4.6	2.9	1.4
2	7.7	3.4
5.4	16.3	1.4
1.7	16	4.6
3.1	7.4	6.3
2	7.7	6.3
5.7	5.7	9.4
15.4	8	3.4
8.9	1.4	2.6
6.9	2	6
5.7	2.9
2.9	3.4
3.1	2.6
2.3	6
6.3	6.6
6	4.3
2.6	3.4
3.7	3.4
13.2	8.6
13.2	13.4
2.3	3.7
12.9	1.7
1.4	10.9
1.1	6
6.9	6.6
3.7	4.3
4.9	9.7
2.6	4.3
3.4	2.3
4	3.4
22.3	3.7
2.3	4
4.6	16
4	10.3
21.7	18.3
3.1	9.2
12.6	28.9
4.9	2
5.4	3.4
6.6	2.6
4	15.7
1.7
6
2.6
3.4
2.3
1.4
2.6
5.4
11.4
2.6
4.6
1.4
16.3
1.4
1.4
16.3
6.9
7.2
3.4
3.7
2
2.3
2
8.9
1.4
1.1
4.9
6.6
3.7
8.6
4
2.9
2.3
2.3
3.4
5.7
8.3
3.4
7.7
4
3.1
2
12.9
3.1
2.9
3.7
19.2
2.3
2
4.6
16.6
2.3
10
4.6
1.1
1.1
0.9
10.6
15.4
6
2.9
2.3
4.9
2.9
21.7
3.1
1.4
1.1
4
8
4.3
2.6
9.2
32
1.4
5.7
3.4
5.4
1.7
2.3
4
5.1
6
15.4
14
5.4
1.7
15.4
1.4
4
4.9
4.6
2
1.7
18
1.1

## Sheet: Fig. 3E
Unloaded Kin Durations (sec)
Kin1	KIn2	Kin3
1.8	2.6	4.8
2.2	1.8	7
2.4	7	0.8
0.8	1.8	2.2
1	3	2
1.6	1.8	0.8
1.2	1.8	1
13	3.4	0.8
1	1.4	5.8
0.8	2	2.6
1.4	1.6	4.4
1.2	1	0.8
1.4	1.6	12.2
1	2.2	0.8
1.8	3	1.2
1.2	1.6	2
2	1.4	3.8
1.8	2.6	7.8
1.4	1	5
2.6	1.2	3.4
1.4	3.6	2.8
0.8	2.6	1.8
1.8	1.6	4.6
2.4	1	2.6
1	1.4	2.8
3.8	1	4.2
1	2	1.8
1.4	2	13.4
1	1.8	8
1.4	3.2	7.4
2.6	2.8	20.4
0.8	2.4	1.4
2.2	3.8	0.6
0.6	2.6	1.6
2.6	1.4	4
1.6	3.2	2.4
1	1.8	4.2
1.2	2.4	9.6
1.2	2.6	4.6
1.2	2	0.6
1	4.2	5.8
2.4	2.4	22.6
1.4	1.4	3.6
1.4	1.8	7.8
2	1.2	8.6
2.8	2.2	5
1.2	1.6	3.4
1.2	1.2	24.4
1.8	2	22.2
1	3	3.2
1.4	2.2	10.8
1.4	2	22.8
1	0.8	17.2
0.8	1.4	8.6
4.2	3.4	6.2
2.2	1.6	17.2
2.8	0.8	1.2
1.4	2.2	1.8
1.8	1.8	14.4
2	3.4	1
1.2	2	1
1.8	1.8	5
2.6	3.6	6.4
1.8	2.4	13
0.6	1.6	2.6
1.2	11.8	10.2
1.4	3.6	0.8
1.6	2.6	1
2.6	1.6	5.4
2.6	2.2	1.2
0.8	2.2	8.8
5	1.6	7.4
10.4	1.6	7.2
2.4	1	5
0.8	2.2	2.6
2.4	4.6	3.4
2.6	2.6	2.2
1.2	2.2	6
2	3.2	1.4
1.2	3.4	2
2.8	1.8	0.8
2	1.2	0.6
1.4	1.6	2.4
0.8	2.8	1.2
1.8	2	2.4
0.8	3.4	1
1.4	2.2	0.4
2.2	4.4	3.8
1.8	1.6	3.6
2.2	3.2	4.4
1	2.6	4.2
1.6	2.6	1.6
3.6	2.4	4.8
4.8	3.2	11.2
1.4	2.4	4.8
1	0.8	7.2
2	2.8	9.2
2.6	4.8	11.8
1.4	1.6	20.2
5.2	9	2
1.4	1.8	8.6
20.6	1.2	13.6
1.4	2	4.6
1.4	1.8	7.6
2.4	2.8	19
1	2.2	5
1.2	1.2	9.2
1	2.8	5.8
5.2	1.6	5.6
1.4	1.8	3
2	0.8	3.4
1.4	1	3.6
3.6	4.2	9.2
3.4	2	3.6
2.4	1.4	8.6
1.2	0.8	6
3.4	1.6	0.8
1.6	1.4	4
1.6	2.4	2
1.4	1.8	0.8
1.8	2	12.8
1.6	2.4	3.6
1.8	2.8	9.2
1.6	1.8	7
2.2	3.8	2
0.8	1	16.2
2.4	1.4	10.2
0.8	1.4	11.6
2.4	1.2	3
2.2	1.6	15.4
1	2	23
1.2	1.2	27.2
1	1	34.6
0.8	2.4	27.4
1.2	2	10.2
1.2	3.2	18.8
1.2	1.2	11.8
1.4	1.6	3
1.6	2	4.2
1	3	23.8
1	1.8	7.8
1.8	1.8	3.8
3	3	4.4
1	3.4	3
1.2	1.4	1.2
1.6	2.2	8.4
2	2	35
1.6	1.4	3.4
1.4	2	14.4
0.8	14	8
10.2	1.8	9
1.4	1.4	11
1	6.2	15.8
0.6	2	1
1.2	1	6.6
2.8	1.8	11.4
0.8	2	26.4
0.8	1.4	24.6
1	1.2	1.6
0.6	2.2
0.8	2
1	2.4
1	2.2
2.4	1.2
3.8	2.8
1.2	2.8
1.4	2.2
1.8	1.4
1.2	1.6
1.4	1.2
0.4	2.2
	1.2
	1.2
	1.4
	1.2
	1.2
	1.6
	2
	1.2
	1.4
	3
	1
	1
	0.6
