# Supplementary material for: Kinesin-1, -2, and -3 motors use family-specific mechanochemical strategies to effectively compete with dynein during bidirectional transport
Source: eLife. 2022 Sep 20;11:e82228. doi: 10.7554/eLife.82228 (PMC9545524; doi:10.7554/eLife.82228)
Supplement: Figure 4—figure supplement 2—source data 1. [file elife-82228-fig4-figsupp2-data1.xlsx]

## Sheet: Fig. S6AandB
X-t (A)							Segment Analysis (B)
Track	Segment #	Time	Distance	Time Plot	Dist Plot		Distance(nm)	Duration(s)	Velocity(nm/s)
				0	0		-2555	4.3	-595.6
4	1	3.718	-657	3.718	-657		-1898	2.6	-737.4
4	2	6.006	0	9.724	-657		-1022	3.1	-324.9
4	3	1.43	-292	11.154	-949		-5183	7.2	-724.9
4	4	3.146	0	14.3	-949		-657	3.7	-176.7
							0	6	0		%Pause	26.0417
				0	0		-292	1.4	-204.2
1	1	5.148	-1898	5.148	-1898		0	3.1	0
1	2	2.288	0	7.436	-1898		-219	13.2	-16.6
1	3	3.432	1533	10.868	-365		-2701	3.4	-787
1	4	1.716	0	12.584	-365		-2117	2.6	-822.5
1	5	1.716	365	14.3	0		1898	5.1	368.7
1	6	4.004	0	18.304	0		0	2.3	0
							-1533	3.4	-446.7
				0	0		0	1.7	0
4	1	13.728	-730	13.728	-730		-365	1.7	-212.7
4	2	4.862	0	18.59	-730		0	4	0
4	3	2.288	-1168	20.878	-1898		-876	2.3	-382.9
4	4	2.288	0	23.166	-1898		-219	13.4	-16.3
4	5	8.294	-3723	31.46	-5621		-1387	7.2	-194
							0	12.3	0
				0	0		0	3.7	0
5	1	3.146	-657	3.146	-657		-3577	11.4	-312.7
5	2	5.434	0	8.58	-657		-3066	5.1	-595.6
5	3	1.43	-511	10.01	-1168		-219	2.3	-95.7
							-1387	0.9	-1616.6
				0	0		-730	10.6	-69
3	1	2.574	-657	2.574	-657		-584	10.6	-55.2
3	2	1.144	0	3.718	-657		0	7.7	0
3	3	1.144	-438	4.862	-1095		-365	35.8	-10.2
3	4	2.574	0	7.436	-1095		-1898	5.4	-349.3
3	5	0.572	-219	8.008	-1314		0	1.7	0
3	6	1.716	0	9.724	-1314		-1825	5.4	-335.8
3	7	5.72	-1387	15.444	-2701		-73	6.3	-11.6
							-803	2.6	-312
				0	0		-73	2	-36.5
3	1	4.862	-1022	4.862	-1022		-1241	3.7	-333.8
3	2	3.146	0	8.008	-1022		-73	8.6	-8.5
							-292	25.2	-11.6
				0	0		-2920	5.1	-567.2
12	1	5.148	-1314	5.148	-1314		-1314	4.9	-270.3
12	2	1.144	-949	6.292	-2263		-73	3.4	-21.3
12	3	1.144	0	7.436	-2263		-2628	4.3	-612.6
12	4	1.144	-438	8.58	-2701		-730	13.7	-53.2
12	5	2.002	0	10.582	-2701		0	4.9	0
12	6	1.716	-949	12.298	-3650		-1168	2.3	-510.5
12	7	3.146	0	15.444	-3650		0	2.3	0
							-3723	8.3	-448.9
							-1533	2.6	-595.6
							-1022	2.3	-446.7
							-803	6.9	-117
							0	2.6	0
							-438	0.9	-510.5
							-73	10.9	-6.7
							-146	5.7	-25.5
							-584	2.6	-226.9
							-73	4.3	-17
							-657	3.4	-191.4
							-146	7.4	-19.6
							-1898	10	-189.6
							-1168	6.3	-185.6
							-219	7.4	-29.5
							-292	2	-145.9
							0	1.1	0
							-803	2.9	-280.8
							-2774	3.1	-881.8
							-3139	29.5	-106.6
							-730	5.4	-134.3
							-1752	4.6	-382.9
							-73	2.9	-25.5
							-9198	10.6	-869.2
							-1460	4.6	-319.1
							0	2	0
							-1533	7.2	-214.4
							73	9.7	7.5
							-584	2.9	-204.2
							-146	4	-36.5
							-292	6.6	-44.4
							-511	1.4	-357.3
							-146	5.1	-28.4
							-657	3.1	-208.8
							0	5.4	0
							-511	1.4	-357.3
							-3504	28.3	-123.8
							-1314	24.3	-54.1
							-584	1.1	-510.5
							0	4.3	0
							-730	1.4	-510.5
							-3504	4.3	-816.8
							-146	0.6	-255.2
							-73	3.7	-19.6
							-438	1.7	-255.2
							0	3.1	0
							-365	1.1	-319.1
							0	1.7	0
							-1022	2	-510.5
							0	2.3	0
							-3577	9.7	-367.9
							-1314	3.4	-382.9
							0	3.1	0
							-511	2	-255.2
							-73	5.4	-13.4
							-1606	5.4	-295.5
							-584	1.1	-510.5
							-73	5.1	-14.2
							0	2.6	0
							-365	0.6	-638.1
							-146	6.6	-22.2
							-365	1.4	-255.2
							-146	8.3	-17.6
							-1825	1.4	-1276.2
							-7300	18.9	-386.7
							-1095	1.7	-638.1
							-73	2.9	-25.5
							-5110	7.2	-714.7
							-1387	6.9	-202.1
							0	3.4	0
							-657	8.6	-76.6
							-511	1.4	-357.3
							-657	8.3	-79.2
							0	2.3	0
							-949	3.7	-255.2
							0	2.3	0
							-438	3.1	-139.2
							-438	6.6	-66.6
							-73	4.6	-16
							-1971	13.4	-146.6
							-584	25.2	-23.2
							-2044	6.6	-310.7
							-1898	2.6	-737.4
							-657	4	-164.1
							-4818	7.4	-647.9
							-730	7.4	-98.2
							-73	5.7	-12.8
							-4964	14.9	-333.8
							-2555	19.2	-133.3
							-803	1.1	-701.9
							-730	1.1	-638.1
							-146	2.9	-51
							-2555	4.9	-525.5
							0	1.7	0
							-657	2.6	-255.2
							0	1.1	0
							-438	1.1	-382.9
							0	2.6	0
							-219	0.6	-382.9
							0	1.7	0
							-1387	5.7	-242.5
							-657	16	-41
							-1022	3.1	-324.9
							-1752	2.6	-680.7
							-1752	25.2	-69.6
							-73	2	-36.5
							-1387	5.4	-255.2
							-146	3.4	-42.5
							-4307	5.4	-792.6
							-730	1.1	-638.1
							0	3.1	0
							-657	1.4	-459.4
							-6059	8	-756.6
							0	3.1	0
							-1606	3.4	-467.9
							0	2	0
							-2117	4.6	-462.6
							-657	2.3	-287.2
							-2701	8	-337.3
							-1095	46.6	-23.5
							-1971	4	-492.3
							-657	1.1	-574.3
							0	2.9	0
							-1898	3.1	-603.3
							-730	3.1	-232
							-949	2	-474
							-1168	2.6	-453.8
							-1679	2	-838.7
							-1825	7.4	-245.4
							-1387	2	-692.8
							-1022	10.3	-99.3
							0	5.7	0
							-2774	6.3	-440.9
							-7519	10.6	-710.5
							-1022	4.9	-210.2
							0	3.1	0
							-4526	6	-753.6
							-1387	4.3	-323.3
							-2482	3.1	-788.9
							-1460	10.6	-138
							-2336	3.1	-742.5
							-3285	4	-820.4
							-803	1.7	-467.9
							-803	6.6	-122.1
							0	2.3	0
							-1679	4.3	-391.4
							0	1.7	0
							-803	1.7	-467.9
							-219	64.1	-3.4
							-3431	4.6	-749.8
							0	7.4	0
							-657	2	-328.2
							-3212	3.7	-863.9
							-5402	8.6	-629.6
							-1022	2.6	-397
							-73	2.3	-31.9
							-657	1.1	-574.3
							-1606	3.4	-467.9
							-219	7.2	-30.6
							-949	5.1	-184.3
							0	3.1	0
							-949	4.9	-195.2
							0	2	0
							-10220	10	-1021
							-8760	12	-729.3
							-1095	2.9	-382.9
							-3796	4	-948.1
							-949	1.1	-829.5
							-949	2.3	-414.8
							0	0.9	0
							-438	1.1	-382.9
							-1533	3.1	-487.3
							-3650	7.2	-510.5
							-9782	12.6	-777.3
							-584	0.9	-680.7
							-292	7.7	-37.8
							0	4.9	0
							-1095	2.9	-382.9
							0	4.3	0
							-438	0.6	-765.7
							-2117	1.7	-1233.7
							-2263	4	-565.2
							-1387	2.3	-606.2
							-1460	3.1	-464.1
							-365	4.6	-79.8
							73	6	12.2
							-511	3.4	-148.9
							0	1.7	0
							-1460	8	-182.3
							-6132	4.9	-1261.2
							0	0.9	0
							-2263	2.3	-989.1
							0	1.1	0
							-8541	9.7	-878.3
							-4818	11.2	-432
							-2409	4.6	-526.4
							-876	1.4	-612.6
							-1971	4	-492.3
							-438	11.4	-38.3
							-511	3.7	-137.4
							-1971	4.9	-405.4
							-73	7.2	-10.2
							-657	2	-328.2
							-3504	4.9	-720.7
							-1387	2	-692.8
							0	2.6	0
							-219	0.9	-255.2
							-73	8.9	-8.2
							-292	1.7	-170.2
							-73	4.9	-15
							-2774	3.4	-808.3
							-1022	2.9	-357.3
							0	2	0
							-1168	1.7	-680.7
							-219	4.6	-47.9
							-876	2	-437.6
							-1314	5.1	-255.2
							-949	1.1	-829.5
							0	1.1	0
							-438	1.1	-382.9
							0	2	0
							-949	1.7	-553
							0	3.1	0
							-1752	2.9	-612.6
							0	2	0
							-2920	4	-729.3
							-2993	6.6	-455
							-803	3.7	-216
							73	1.7	42.5
							-876	2	-437.6
							-1606	6	-267.4
							-1825	17.4	-104.6
							-73	36.9	-2
							-876	2	-437.6
							-365	2.3	-159.5
							-1606	2.3	-701.9
							0	8.9	0
							-1314	6.9	-191.4
							-803	0.9	-935.9
							-584	6.6	-88.8
							-657	1.4	-459.4
