# Supplementary material for: Kinesin-1, -2, and -3 motors use family-specific mechanochemical strategies to effectively compete with dynein during bidirectional transport
Source: eLife. 2022 Sep 20;11:e82228. doi: 10.7554/eLife.82228 (PMC9545524; doi:10.7554/eLife.82228)
Supplement: Figure 4—source data 1. [file elife-82228-fig4-data1.xlsx]

## Sheet: Fig. 4A
Slow Seg Velocities (Unweighted) (nm/s)
DDB-Kin1	DDB-Kin2	DDB-Kin3
19.63	111	0
435.42	12.5	-102.1
0	0	-28.4
530.12	-319.1	-106.4
204.2	-75.1	0
0	-569.4	-255.2
467.95	-600.3	0
63.81	-121.8	-306.3
331.82	-36.5	-18.5
-8.51	-88.8	0
-311.97	-51	-34.5
-304.33	-382.9	6.7
0	0	42.5
9.12	-467.9	1084.8
-306.29	0	328.2
24.9	-595.6	-69.2
-191.43	0	-465.4
198.52	-425.4	-11.1
-7.98	-23.2	-21.3
-893.36	-212.7	-255.2
-21.12	-255.2	-28.4
-425.41	28.4	-340.3
-19.63	-638.1	14.2
-116.02	0	-119.6
0	-280.8	-56
-170.16	0	16
0	273.5	-204.2
382.87	0	-14.2
0	255.2	-127.6
-201.51	0	0
31.91	351	-139.2
-364.64	-56.7	7.1
-51.05	-120.1	223.3
-1123.08	-182.3	-109.4
-453.77	0	-12.8
0	-131.7	-124.2
-32.49	0	-283.6
15.01	-113.4	-68.7
107.04	0	-280.8
0	-102.1	-42.5
21.27	16	-364.6
510.49	196.3	-31.9
4.18	-208.8	0
0	0	42.5
663.64	-170.2	191.4
425.41	-11.7	561.5
0	-229.7	0
319.06	-7.1	-137.4
-10.64	-127.6	-25.5
117.81	-30	0
0	-139.2	-170.2
494.54	-114.9	0
0	-18.2	255.2
51.05	-46.7	0
-474.03	-536	255.2
0	-5.9	-255.2
-283.61	-127.6	-829.5
-14.18	-29.5	-2.3
-204.2	28.4	-232
-18.23	204.2	255.2
255.24	0	0
-297.79	0	-638.1
0	-162.4	-7.7
-425.41	-69.6	-51
53.74	-11.1	-237
-255.24	-145.9	-14.2
-57.43	5.5	212.7
116.02	-586.1	0
-142.94	-116	-264.4
0	-20.3	0
-382.87	-742.5	-60.1
0	-553	-255.2
-357.34	0	-765.7
25.52	-306.3	7.4
-255.24	0	87.3
-8.1	-408.4	0
26.87	9.8	-9.8
553.03	-255.2	156
5.43	0	-3.9
531.76	-43.8	-91.2
0	0	-8.4
583.42	283.6	-478.6
8.8	0	-16
159.53	175.5	-340.3
408.39	-21.3	9.5
0	111.7	-127.6
-162.43	5	0
0	-29.2	24.3
-319.06	0	-162.4
-42.54	-34.6	0
-311.97	-190.4	-340.3
-11.1	-234	0
601.65	0	-446.7
0	-319.1	-85.1
510.49	0	-17
8.51	-183.5	-36.5
413.25	-150.8	-480.5
5.94	-28.4	0
0	-170.2	-301.7
-127.62	18.9	-63.8
29.45	139.2	-290.5
-7.98	56.7	-7.5
-25.78	191.4	-489.2
0	1.9	-127.6
-510.49	-166.2	0
-18.5	-312	-406.5
-212.7	-16	0
-9.69	170.2	408.4
-765.73	-8.7	0
-23.2	-78.5	589
-364.64	-16	42.5
0	-201.8	0
-375.36	14.2	595.6
-120.12	135.1	2.9
-816.78	14.2	-319.1
-102.1	155	0
-18.56	33.3	-680.7
-132.02	574.3	0
-561.54	0	-580.1
0	2.2	-17
-446.68	287.2	-328.2
-26.4	17.6	0
127.62	188.7	0
-6.9	-2	-99.9
16.12	41.4	-328.2
510.49	16	0
9.45	28.4	-247
608.66	255.2	0
11.87	36.5	-182.3
-220.44	71.5	-96.8
-499.39	182.3	61
-198.52	0	1148.6
-2.93	297.8	0
510.49	0	255.2
5.21	-31.9	0
482.13	-255.2	182.3
19.63	-26.9	6.5
553.03	-51	-561.5
0	-291.7	120.9
56.72	-21.3	0
403.02	31.9	-255.2
-7.51	-170.2	0
-255.24	0	-127.6
0	-351	-8.8
-85.08	-21.9	-191.4
0	1.6	-191.4
-484.97	-255.2	21.3
692.81	0	425.4
-2.5	-153.1	-5.3
-9.45	0	-57.2
-1340.03	-255.2	0
0	23.2	-765.7
-10.21	-510.5	28.4
459.44	0	255.2
54.7	-232	12.8
808.28	0	117.8
9.45	-19.6	0
-145.85	-446.7	-218.8
0	-42.5	255.2
-95.72	-255.2	6.7
670.02	79.8	-153.1
0	5.4	212.7
474.03	263.2	11.6
0	0	-216
271.2	319.1	0
656.34	109.4	-38.7
0	60.8	-58.9
510.49	-23.2	-21.9
72.93	58.9	30
574.3	-324.9	652.3
6.3	-3.8	765.7
6.81	374.4	127.6
95.72	85.1	729.3
-95.72	11.9	63.8
561.54	-109.4	-102.1
9.12	91.2	191.4
689.16	13.4	25.5
22.69	255.2	266.8
-5.49	6.9	0
-99.26	-316.5	11.6
0	-91.2	425.4
382.87	0	23.2
-10.21	-331.8	-795.8
52.81	0	-255.2
-76.13	-287.2	-28.6
5.21	-36.5	117.8
0	-297.8	20.4
-255.24	-198.5	619.9
0	0	232
-188.08	255.2	-170.2
7.98	-6.3	-40.3
-42.54	-69	-366.9
159.53	-19.6	-191.4
-15.01	127.6	-12.9
2.01	-98.8	0
-533.69	0	-214.9
-36.46	-510.5	0
-542.4	-19.6	-638.1
-146.96	-118.4	0
11.6	-64.9	-89.3
-159.53	-364.6	0
-654.06	-85.1	0
357.34	0	510.5
25.96	-303.1	0
330.32	-351	-255.2
0	0	87.7
-8.65	8.5	-319.1
-306.29	-187.2	0
0	0	340.3
-153.15	-865.6	5.5
0	-319.1	17
-145.85	8.5	319.1
-45.38	-127.6	12.8
-85.08	0	127.6
-2.3	-85.1	0
-98.17	-21.3	663.6
-20.42	-127.6	51
-148.89	-21.3	829.5
-11.1	-218.8	15
-20.7	212.7	165.2
-459.44	5.1	0
204.2	-691.5	189.6
-303.1	0	0
-149.82	162.4	255.2
19.63	-119.1	-18.2
212.7	-510.5	159.5
15.95	-20.4	-127.6
103.48	-446.7	-25.5
-565.18	-136.1	-113.4
-68.07	-7.1	-105.1
0	-72.3	-61.3
-28.65	-18.2	-21.9
510.49	-170.2	-135.1
0	-53.7	-6.6
283.61	14.2	-5.6
34.03	229.7	-71.6
204.2	6.8	244.1
21.27	45.9	9.8
-714.69	0	23.2
-95.72	223.3	102.1
38.29	14	587.1
319.06	0	12.2
29.01	255.2	7.7
212.7	0	114.9
7.19	306.3	30.9
0	8.8	548.8
-595.57	-397	0
0	-201.5	-735.7
137.44	-79.8	-1191.1
9.12	0	-619.9
-34.81	-115.3	-1063.5
16.53	-516.2	0
-23.93	-255.2	-893.4
7.51	-527.5	0
-48.29	127.6	-159.5
-8.8	0	-978.4
-15.31	-255.2	31.9
-155.98	-17	297.8
0	-354.5	3.2
619.88	-255.2	-23.2
229.72	0	102.1
0	-638.1	0
-157.07	0	-324.9
-437.56	-474	-16.2
-55.49	-85.1	-13.4
-19.63	0	-37.3
-182.32	-19.6	-510.5
-22.2	-85.1	-31.9
-935.9	-12.8	-425.4
0	-153.1	0
110.98	-79.8	-333.8
-54.7	-26.9	-19.6
-33.58	23.2	-189.8
-306.29	4	-14.6
3.4	-382.9	-306.3
44.39	-816.8	-22.5
-148.89	-239.8	-30
11.6	-465.4	-148.9
-364.64	-266.8	-38.3
-58.9	-68.1	0
0	-243.1	-127.6
-127.62	-240.9	709
0	-54	6.1
0	-688.1	-12.8
278.45	-51	-290.1
23.2	-471.2	19.6
102.1	-7.3	115.3
0	-92.8	-1217.3
200.55	-20.7	-1109
25.52	11.1	-12.8
464.08	-351	-290.1
-29.87	-23.2	19.6
-7.81	-116	115.3
-9.45	17	-37.4
-86.89	-147.8	-19.6
-11.1	-31.1	-232
-175.48	0	-11.6
-55.49	107.5	-140
440.88	-139.2	238.2
6.23	0	12.8
574.3	-102.1	90.1
-93.59	0	0
-19.63	-268.7	104.4
0	-21.3	348.1
-52.21	-222	0
-25.16	170.2	207.4
9.94	11.6	-8.2
-119.11	328.2	28.4
7.09	102.1	113.4
-701.92	176.7	5.7
12.15	0	-40.5
-170.16	0	-67.2
0	153.1	-110.6
-255.24	31.9	-40.3
0	-82	-312
-221.95	0	28.4
-25.52	0	173.6
-116.02	-255.2	44
-401.1	0	-30.9
0	-425.4	107
-340.33	135.1	0
-574.3	-16	-175.5
4.96	-42.5	-538.9
100.27	22.5	0
-9.45	-78.1	0
-44.57	-229.7	-510.5
-127.62	-364.6	-39.3
-335.85	0	-440.9
-212.7	204.2	-92.8
-23.2	-68.1	-548.3
-401.1	-574.3	0
0	-36.5	401.1
-226.88	204.2	0
0	-204.2	-71.6
440.88	0	-99.9
0	-157.1	-99.9
364.64	255.2	-62.1
0	0	-44.7
-106.35	-437.6	-680.7
-155.98	127.6	-117.8
-29.45	-510.5	102.1
-788.94	0	-95.7
340.33	-314.1	0
19.63	0	-223.3
106.35	-319.1	-164.1
462.63	0	23.9
-51.66	210.2	-79.8
-198.52	0	0
0	-804.4	-153.1
-191.43	-272.3	-9.1
-13.43	-239.3	397
-76.57	-18.9	17
15.95	-467.9	-78
9.34	4.5	-12.8
446.68	-94.6	255.2
19.87	4.9	0
0	-36.5	-626.5
145.85	0	-21.3
-8.8	-97.2	-212.7
17.35	-18.2	7.3
80.6	170.2	69.6
30.63	7.5	-127.6
-170.16	4	-1276.2
-6.08	-719.3	-226.9
-8.1	0	0
-170.16	-85.1	176.7
0	0	0
0	-106.7	297.8
-510.49	0	-10.2
-1042.25	-107.5	-150.8
401.1	-390.4	394.5
0	-191.4	15.7
0	-474	335
-255.24	-838.7	23.2
0	-182.3	48.3
19.63	0	-12.2
-59.36	-212.7	-111
-11.1	-159.5	-217.4
-85.08	-6.9	-432
-5.46	-139.2	0
16.74	0	969.9
170.16	-107.6	-191.4
23.93	-4.8	0
204.2	-158	-204.2
0	-23.2	0
204.2	-113.4	-340.3
-71.79	-28.4	-16
276.52	-87.2	-283.6
0	-28.6	0
459.44	-6.4	-255.2
0	-246.7	0
335.01	-376.8	-360.3
-102.1	232	0
212.7	0	-182.3
-5.7	136.5	-35.5
-7.89	-189.4	-282.1
-199.94	-28.4	-15.5
23.2	-139.2	-287.2
-553.03	0	-191.4
-135.13	-340.3	0
-425.41	-34.8	-117.8
0	-191.4	-47.3
-446.68	-63.8	137.4
-9.45	-402.7	446.7
109.39	-23.2	1244.3
0	-297.8	0
47.49	0	-273.5
229.72	-95.7	-346.4
12.15	-6.2	-670
446.68	0	120.9
0	171.4	0
-319.06	4.3	-3.6
0	-518.2	-45.4
-75.07	-301.7	0
-19.14	-489.2	-159.5
-3.57	-56.7	0
-153.15	-255.2	-145.9
85.08	-382.9	-22.2
587.06	-66.6	-133.2
274.88	0	0
19.63	-272.3	-152.3
-692.81	-15.6	-274.9
-32.93	-333.8	-19.6
-236.34	-51	-176.7
0	0	-132.3
-315.3	40.5	10.6
-139.22	127.6	510.5
8.51	0	107.5
-145.85	102.1	0
0	-58	36.5
-8.23	15.3	303.1
-1020.98	-5.8	6.9
-182.32	-127.6	60.1
345.33	12.8	5.9
9.34	-401.1	-6.8
0	-218.8	-18.7
8.51	11.1	-6.9
306.29	-16.2	-52.4
26.87	-148.9	0
467.95	-9.8	-95.7
51.05	-820.4	0
419.33	-299.6	-255.2
-15.76	-15.5	0
40.3	-368.7	-255.2
2.02	-31.9	-4.8
-371.27	-170.2	-81.7
139.22	-647.9	-794.1
-343.6	-558.3	-85.1
0	-765.7	0
-510.49	-654.1	-168.1
-178.67	-82.2	120.1
-102.1	-714.7	0
-85.08	-42.5	612.6
-4.18	-875.1	0
-29.55	-437.6	0
-170.16	-177.3	-20.7
0	-113.4	357.3
-95.72	11.6	210.9
-27.35	-91.9	15.5
471.22	-17	0
2.97	-12.2	-170.2
306.29	-85.1	0
-21.27	7.3	-297.8
-141.8	-918.9	-102.1
0	-15	-561.5
-170.16	-22.1	-340.3
-11.6	-96.8	-34.8
451.59	0	-198.5
-7.73	-297.8	-105.6
7.51	0	-92.3
32.49	-510.5	-85.1
0	-978.4	13.4
85.08	175.5	-199.2
1.34	0	-652.3
-638.11	148.9	18.2
85.08	67.2	-140.8
0	0	-29.3
178.67	-401.1	-10.9
27.74	-191.4	-102.1
14.18	0	-15.3
255.24	-429.9	-78
-25.52	-145.9	-23.2
153.15	-437.6	6.1
5.21	0	166.9
114.86	-319.1	0
63.81	0	218.8
0	-255.2	3.9
45.94	0	10.6
228.38	-216	-287.2
18.81	255.2	-223.3
-11.78	-638.1	0
12.76	0	-461.2
-127.62	-467.9	-485
11.6	0	-25.5
4.15	-170.2	-257.7
-331.82	-13.8	-127.6
0	-170.2	-255.2
-510.49	-6.5	-476.5
0	0	-287.2
816.78	-61.9	-39.3
328.17	0	-283.6
17.02	-149.3	-42.5
107.47	-170.2	11.6
-21.27	-24.3	-353.4
72.93	-105.1	-412.3
0	0	-39.3
294.51	0	-382.9
20.7	-41	-46.4
382.87	-109.4	-510.5
7.73	-13.9	-103.2
425.41	29.7	-20.2
13.74	-80.6	-63.8
8.8	36.5	-153.1
344.58	232	-12.2
0	51	8.2
561.54	357.3	-255.2
-6.38	-224.3	0
-204.2	-31.9	-185.6
-6.9	-196.3	0
510.49	-99.9	56.7
45.04	-26.9	0
194.47	-136.1	176
368.69	-46.4	17
58.9	-255.2	340.3
446.68	-93.8	-71.8
0	0	714.7
-196.34	131.3	0
0	-5.9	893.4
-29.17	63.8	60.8
-144.14	9.2	382.9
-306.29	229.7	16.6
0	15	0
-589.03	204.2	-65.6
0	92.2	7.7
446.68	-24.5	-139.2
39.27	-62.4	-25.2
291.71	-425.4	-170.2
0	0	0
287.15	-208.8	-198.5
0	9.8	0
-297.79	-51.9	-265.1
12.15	0	21.3
-185.63	2	-166.5
-4.82	-36.5	28.1
510.49	-2.3	6.6
52.21	-3.3	-72.9
2.16	-61.3	0
-127.62	-60.8	0
0	11.1	-164.1
-85.08	-102.1	41.2
9.82	-22.7	-59.3
-48.62	-127.6	-116
-53.18	7.2	-23.2
0	72.9	-239.3
0	23.2	0
-85.08	-119.1	714.7
7.29	-37.4	76.6
0	-68.1
340.33	-38.3
-7.73	-185.6
0	-40.8
-45.04	-5.5
12.76	-88.4
287.15	0
23.2	85.1
69.61	0
538.85	52.6
36.46	-12.2
510.49	-140.4
-14.5	0
553.03	-255.2
122.07	0
-7.85	-765.7
204.2	-23.2
0	-109.4
-984.52	0
-425.41	-85.1
0	-476.5
-484.97	-24.8
457.68	-30.4
10.21	-223.3
-6.23	36.5
85.08	-287.2
0	0
191.43	-382.9
5.43	-135.1
12.15	0
601.65	-237
	0
	-255.2
	-493.5
	-127.6
	0
	153.1
	-382.9
	-117.8
	-446.7
	-42.5
	-425.4
	153.1
	-561.5
	182.3
	111.7
	21.3
	-153.1
	-12.5
	-145.9
	-25.5
	-218.8
	-47.9
	-306.3
	-36.5
	-229.7
	-39.3
	-487.3
	0
	-182.3
	0
	-170.2
	182.3
	0
	-35.9
	170.2
	0
	-630.1
	0
	-659.4
	3.1
	-467.9
	-8.5
	-619.9
	0
	-90.1
	113.4
	0
	297.8
	95.7
	0
	170.2
	25.5
	91.2
	-319.1
	19.6
	-312
	0
	-765.7
	98.2
	-60.8
	10.2
	-180.2
	0
	-90.1
	0
	0
	-765.7
	0
	-446.7
	-54.7
	-122.1
	85.1
	-105.4
	-687.9
	-111.4
	-278.4
	-7.7
	-397
	0
	-459.4
	-736.3
	-404.1
	-382.9
	-86.3
	-36.5
	-61.3
	0
	-838.7
	-452.5
	-765.7
	5.6
	85.1
	-51
	-590.3
	-680.7
	-34
	-348.8
	0
	-204.2
	0
	-232
	0
	-351
	0
	139.2
	2.6
	57.8
	7.1
	116
	-255.2
	18.2
	-181.4
	0
	80.6
	12.8
	-344.9
	-31.9
	-331.8
	0
	-306.3
	-151.1

## Sheet: Fig. 4C
Minus Plus Slow Trace Pause Durations (sec)
DDB-Kin1 +	DDB-Kin1 -	DDB-Kin2 +	DDB-Kin2 -	DDB-Kin3 +	DDB-Kin3 -
1.4	8.6	12.58	1.72	8.01	7.72
1.4	6	8.29	2.57	6.86	3.72
1.1	8	2.57	1.72	2	3.15				DDB-Kin1 +	DDB-Kin1 -	DDB-Kin2 +	DDB-Kin2 -	DDB-Kin3 +	DDB-Kin3 -
4.9	9.2	4.58	2.29	6.01	5.15		Pause Dur	median	4.75	4.3	5.15	3.72	4.72	3.72
2.3	2.9	2.57	3.15	7.44	10.87			cdf	5.67	4.6	5.24	4.08	4.87	3.83
3.4	4	1.72	2.57	1.43	6.58		% Diff		18.8713		22.1374		21.3552
17.4	2.6	5.72	3.43	2.57	3.43
8.3	2.3	5.15	3.43	4.58	2.57
3.7	1.4	3.43	3.15	25.45	5.15
6.9	1.7	5.15	1.43	3.15	4.58
9.4	1.4	5.15	3.43	5.43	5.15
2.9	5.1	2.57	10.3	11.15	2.86
13.4	4	32.6	12.3	13.73	10.3
1.4	2.6	37.18	14.87	5.15	5.72
2.6	14	2	6.58	10.87	40.9
8.6	6.6	1.72	13.16	6.29	32.03
7.7	2.9	2.57	1.14	3.15	3.15
14	2.3	13.44	1.14	1.14	9.44
3.7	2	5.43	7.44	2.86	5.15
3.4	1.7	19.16	2	3.15	2.86
29.2	2.9	5.43	14.59	6.29	7.44
7.2	2.6	10.58	7.15	2.29	4.58
7.7	3.1	8.58	2.86	1.72	7.72
5.1	2	14.3	12.01	1.72	2
2.3	1.1	2	2.57	13.16	1.14
2.9	24.9	5.43	39.18	4.29	1.43
8	9.7	2.29	4.58	5.72	4.29
2	3.4	2	1.43	9.15	2
4.6	3.1	8.29	2.86	4.86	2.29
2	7.7	7.15	45.47	3.43	2
3.4	2.3	18.3	2.29	2.29	1.72
8	3.4	4	6.58	7.44	5.72
8.9	6.6	6.29	3.15	3.15	4.29
3.4	14	5.72	3.72	6.01	1.43
21.5	4.3	4.58	4	9.44	2.86
5.1	2.3	6.58	3.72	2	1.43
3.1	9.2	4.29	1.72	2.29	3.43
7.7	4.9	2	3.15	23.17	1.43
2.9	36.3	16.87	2.29	12.01	82.08
11.7	2	5.15	2.57	3.15	8.29
4.3	6.3	4	2	1.43	3.43
3.7	3.7	1.72	3.43	8.87	12.87
7.4	3.7	1.43	3.15	12.87	2.29
3.7	31.7	4.86	2.57	8.01	2
9.4	6.6	2.29	8.58	4.29	8.29
2.3	40.9	2.57	4.29	3.15	2
1.7	4.9	5.15	8.58	3.15	4
4.3	4.9	2	3.72	6.01	2.86
1.4	9.7	5.72	3.43	5.15	3.15
6	8.3	28.03	10.3	8.87	5.72
3.7	3.7	10.3	4	2.57	3.15
0	4.3	9.44	5.15	10.58	2.29
8.6	6.3		4.86	1.14	5.43
24.6	4.3		4.29	1.14	2.29
9.4	7.7		2.86	12.01	1.72
9.7	10		1.43	7.15	3.72
7.7	10.3		3.72	3.15	5.15
54.6	6		1.43	4.29	5.72
2.3	16		10.01	4.58	3.72
2.9	4.3		6.58	4.29	5.72
26	2.9		8.01		3.72
4.6	3.1		4		3.72
3.4	2.6		2.29		8.01
2.3	2.3		5.43		11.15
9.4	4.6		2.29		2.29
1.1	12		2		3.15
2	3.4		4.58		2.86
23.5	2.6		2.29		2.57
9.4	5.1		2		8.01
5.7	2.9		2.57		5.72
3.1	3.7		2.57		3.43
7.2	3.1		1.72		7.72
11.7	3.1		2.57		7.15
4	7.7		5.72		2.29
13.4	2.6		16.3		2.29
	2.3		14.87		3.72
	8		8.29		4.58
	4		5.43		2.86
	8.6		4		1.72
	3.4		3.72		0.86
	8.9		3.43		3.15
	1.7		10.58		20.02
	17.4		2		2.29
	9.2		15.16		2
	3.4		3.15		2
	1.4		2.57		3.72
	6.3		11.44		4.58
	5.7		2.57		4.58
	6.3		2.57		2.29
	1.4		3.15		3.15
	5.1		2.57		73.22
	5.7		11.73		10.3
	2.9		3.72		5.72
	1.1		5.72		6.86
	10.3		6.58		15.16
	6		7.44		2.86
	33.7		6.29		6.29
	2		4.29		6.01
	7.4		6.01		8.87
	11.7		10.01		3.72
	3.1		4		4.58
	10		1.43		5.43
	7.2		3.43		9.44
	1.4		2.57		3.15
	1.4		2.86		2.57
			6.58		3.43
			1.72		8.01
			1.43		4.58
			5.15		3.15
			11.15
			5.15
			4.58
			5.72
			16.02
			2.29
			6.01
			12.3
			1.43
			7.44
			3.43
			36.32
			31.46
			22.02
			6.58
			13.16
			5.72
			4.58
			6.01
			2.57
			4
			3.15
			3.72
			2
			3.15
			2
			6.01
			2.57
			3.43
			2.86
			2
			2.86
			6.58
			1.72
			23.45
			8.58
			4.86
			7.15
			17.73
			2.86
			1.72
			1.14
			9.44
			1.43
			4.58
			1.72
			7.72
			2
			3.43
			4
			2.29
			3.15

## Sheet: Fig. 4D
Slow Seg Pause Durations (sec)
DDB-Kin1	DDB-Kin2	DDB-Kin3	DDB Alone
1.4	1.72	7.72	6.101
1.4	2.57	3.72	3.134
1.1	1.72	3.15	2.383
8.6	2.29	5.15	1.621
6	3.15	10.87	4.099
8	2.57	6.58	12.203
9.2	3.43	3.43	3.623
2.9	12.58	2.57	7.817
4	8.29	5.15	1.644
2.6	2.57	4.58	2.05
2.3	3.43	5.15	3.432
1.4	3.15	2.86	4.957
1.7	1.43	10.3	2.193
4.9	4.58	5.72	2.669
2.3	3.43	40.9	10.868
3.4	10.3	8.01	4.195
17.4	12.3	6.86	1.239
8.3	2.57	2	2.765
3.7	1.72	6.01	2.097
6.9	14.87	32.03	9.629
9.4	6.58	3.15	5.339
2.9	13.16	9.44	4.385
1.4	1.14	5.15	3.575
5.1	1.14	7.44	3.098
4	7.44	2.86	1.811
2.6	2	12.3	2.288
14	5.72	7.44	3.146
6.6	5.15	4.58	5.005
2.9	3.43	7.72	2.574
13.4	14.59	2	3.527
1.4	7.15	1.14	2.383
2.3	2.86	1.43	2.383
2	12.01	4.29	4.576
1.7	2.57	2	5.625
2.6	39.18	2.29	1.621
8.6	4.58	2	1.049
2.9	5.15	1.43	2.479
2.6	5.15	2.57	1.764
3.1	2.57	4.58	1.859
2	32.6	25.45	3.039
1.1	37.18	1.72	3.003
7.7	2	5.72	2.002
24.9	1.72	4.29	2.955
14	2.57	1.43	5.577
3.7	1.43	2.86	3.217
3.4	2.86	1.43	2.145
9.7	45.47	3.43	1.644
3.4	2.29	3.15	7.293
3.1	6.58	5.43	2.359
29.2	3.15	11.15	3.003
7.7	3.72	1.43	1.93
2.3	4	82.08	0.715
7.2	3.72	8.29	4.862
7.7	1.72	3.43	4.195
3.4	13.44	13.73	6.101
5.1	5.43	12.87	1.716
2.3	3.15	5.15	0.763
2.9	19.16	10.87	1.001
8	5.43	6.29	7.245
6.6	10.58	3.15	2.479
14	2.29	1.14	8.914
4.3	2.57	2.86	4.719
2.3	2	3.15	1.859
9.2	8.58	6.29	1.001
4.9	3.43	2.29	2.002
36.3	3.15	2	3.194
2	2.57	8.29	1.859
6.3	8.58	2	1.764
2	4.29	2.29	36.965
3.7	8.58	1.72	8.938
3.7	3.72	1.72
31.7	3.43	13.16
6.6	14.3	4.29
4.6	2	5.72
40.9	10.3	9.15
2	4	4.86
3.4	5.15	3.43
4.9	5.43	2.29
4.9	2.29	4
8	2	2.86
9.7	8.29	7.44
8.3	4.86	3.15
8.9	7.15	6.01
3.4	4.29	9.44
3.7	2.86	2
4.3	1.43	3.15
21.5	3.72	5.72
6.3	18.3	2.29
4.3	1.43	23.17
7.7	10.01	3.15
5.1	6.58	2.29
3.1	4	5.43
7.7	8.01	2.29
2.9	4	1.72
11.7	6.29	3.72
10	5.72	5.15
10.3	4.58	12.01
6	2.29	5.72
16	5.43	3.72
4.3	2.29	5.72
2.9	2	3.72
3.1	4.58	3.72
2.6	2.29	3.15
4.3	2	1.43
3.7	2.57	8.87
7.4	2.57	12.87
3.7	1.72	8.01
2.3	2.57	11.15
4.6	5.72	2.29
9.4	6.58	3.15
12	16.3	8.01
3.4	14.87	2.86
2.6	8.29	2.57
2.3	5.43	8.01
5.1	4	4.29
2.9	3.72	5.72
3.7	3.43	3.15
1.7	10.58	3.43
4.3	2	7.72
1.4	15.16	3.15
3.1	3.15	7.15
3.1	2.57	6.01
7.7	11.44	2.29
2.6	4.29	2.29
6	2.57	3.72
2.3	2.57	4.58
8	3.15	2.86
3.7	2.57	1.72
4	11.73	0.86
8.6	2	5.15
3.4	16.87	3.15
8.9	3.72	8.87
0	5.15	20.02
8.6	4	2.29
1.7	5.72	2
17.4	6.58	2
9.2	7.44	3.72
24.6	6.29	2.57
3.4	4.29	10.58
1.4	6.01	4.58
6.3	10.01	4.58
9.4	4	2.29
9.7	1.43	3.15
7.7	1.72	1.14
54.6	3.43	1.14
2.3	2.57	73.22
2.9	2.86	10.3
26	6.58	5.72
5.7	1.72	12.01
6.3	1.43	7.15
1.4	5.15	6.86
4.6	11.15	15.16
3.4	5.15	2.86
2.3	4.58	6.29
9.4	5.72	6.01
1.1	16.02	8.87
5.1	1.43	3.72
5.7	2.29	4.58
2.9	6.01	3.15
1.1	12.3	4.29
2	4.86	4.58
10.3	1.43	5.43
6	7.44	9.44
33.7	3.43	3.15
2	36.32	2.57
7.4	31.46	3.43
11.7	22.02	8.01
3.1	6.58	4.58
10	13.16	3.15
23.5	5.72	4.29
9.4	4.58
7.2	6.01
5.7	2.57
3.1	4
1.4	3.15
1.4	3.72
7.2	2
11.7	3.15
4	2
13.4	6.01
	2.57
	3.43
	2.86
	2
	2.86
	6.58
	2.29
	2.57
	1.72
	23.45
	8.58
	5.15
	2
	5.72
	4.86
	7.15
	17.73
	2.86
	1.72
	1.14
	9.44
	1.43
	4.58
	1.72
	7.72
	2
	3.43
	28.03
	10.3
	4
	9.44
	2.29
	3.15
