# Supplementary material for: Kinesin-1, -2, and -3 motors use family-specific mechanochemical strategies to effectively compete with dynein during bidirectional transport
Source: eLife. 2022 Sep 20;11:e82228. doi: 10.7554/eLife.82228 (PMC9545524; doi:10.7554/eLife.82228)
Supplement: Figure 5—source data 1. [file elife-82228-fig5-data1.xlsx]

## Sheet: Fig. 5A-C
Slow 1-sec Seg Velocities (no pauses) (nms/)				Gaussian Fits
DDB-Kin1	DDB-Kin2	DDB-Kin3		DDB-Kin1		DDB-Kin2		DDB-Kin3
-311.97	-319.1	-102.1		Exp	Sim	Exp	Sim	Exp	Sim
-311.97	-75.1	-102.1	Mean	-2	5	-22	-36	-16	-28
-311.97	-75.1	-102.1	SD	22	51	32	59	32	51
-304.33	-75.1	-28.4
-304.33	-75.1	-28.4
-304.33	-75.1	-28.4
-304.33	-569.4	-28.4
-304.33	-569.4	-28.4
-304.33	-569.4	-28.4
-304.33	-569.4	-28.4
-304.33	-600.3	-28.4
-304.33	-600.3	-106.4
-304.33	-600.3	-106.4
-304.33	-600.3	-106.4
-304.33	-600.3	-255.2
-304.33	-600.3	-306.3
-304.33	-600.3	-18.5
-304.33	-600.3	-18.5
-306.29	-600.3	-18.5
-191.43	-600.3	-18.5
-893.36	-600.3	-18.5
-21.12	-600.3	-18.5
-21.12	-600.3	-18.5
-21.12	-600.3	-18.5
-21.12	-600.3	-18.5
-21.12	-121.8	-18.5
-21.12	-121.8	-18.5
-21.12	-121.8	-18.5
-21.12	-121.8	-18.5
-21.12	-121.8	-18.5
-21.12	-121.8	-18.5
-21.12	-121.8	-18.5
-21.12	-121.8	-18.5
-21.12	-121.8	-18.5
-21.12	-121.8	-18.5
-21.12	-121.8	-18.5
-21.12	-121.8	-34.5
-21.12	-121.8	-34.5
-21.12	-36.5	-34.5
-21.12	-36.5	-34.5
-21.12	-36.5	-34.5
-21.12	-36.5	-34.5
-21.12	-36.5	-34.5
-21.12	-36.5	-34.5
-21.12	-88.8	-34.5
-21.12	-88.8	-34.5
-21.12	-88.8	-34.5
-21.12	-88.8	-69.2
-21.12	-88.8	-69.2
-21.12	-88.8	-69.2
-21.12	-88.8	-69.2
-21.12	-51	-69.2
-21.12	-51	-69.2
-21.12	-51	-69.2
-21.12	-51	-69.2
-21.12	-382.9	-69.2
-21.12	-382.9	-69.2
-21.12	-467.9	-69.2
-21.12	-467.9	-69.2
-21.12	-595.6	-69.2
-21.12	-425.4	-69.2
-21.12	-212.7	-69.2
-21.12	-212.7	-69.2
-425.41	-255.2	-69.2
-19.63	-255.2	-465.4
-19.63	-255.2	-465.4
-19.63	-255.2	-465.4
-19.63	-638.1	-465.4
-19.63	-280.8	-465.4
-19.63	-280.8	-255.2
-19.63	-280.8	-255.2
-19.63	-56.7	-340.3
-19.63	-56.7	-119.6
-19.63	-56.7	-119.6
-19.63	-56.7	-119.6
-116.02	-56.7	-119.6
-116.02	-56.7	-119.6
-116.02	-56.7	-119.6
-170.16	-56.7	-119.6
-201.51	-56.7	-119.6
-201.51	-56.7	-119.6
-201.51	-120.1	-56
-201.51	-120.1	-56
-201.51	-120.1	-56
-364.64	-120.1	-56
-364.64	-120.1	-56
-1123.08	-182.3	-56
-453.77	-182.3	-56
-453.77	-131.7	-56
-453.77	-131.7	-56
-32.49	-131.7	-56
-32.49	-131.7	-56
-32.49	-131.7	-56
-32.49	-131.7	-204.2
-32.49	-131.7	-127.6
-32.49	-131.7	-127.6
-32.49	-131.7	-127.6
-32.49	-113.4	-127.6
-32.49	-113.4	-127.6
-32.49	-113.4	-127.6
-32.49	-102.1	-127.6
-32.49	-208.8	-127.6
-32.49	-208.8	-127.6
-32.49	-208.8	-139.2
-32.49	-170.2	-139.2
-32.49	-11.7	-139.2
-474.03	-11.7	-109.4
-474.03	-11.7	-109.4
-283.61	-11.7	-109.4
-283.61	-11.7	-109.4
-283.61	-11.7	-109.4
-204.2	-11.7	-109.4
-204.2	-11.7	-124.2
-204.2	-11.7	-124.2
-204.2	-11.7	-124.2
-204.2	-11.7	-124.2
-204.2	-11.7	-124.2
-297.79	-11.7	-124.2
-297.79	-11.7	-124.2
-425.41	-11.7	-124.2
-255.24	-11.7	-124.2
-255.24	-11.7	-124.2
-255.24	-11.7	-124.2
-255.24	-11.7	-283.6
-255.24	-11.7	-283.6
-57.43	-11.7	-283.6
-57.43	-11.7	-68.7
-57.43	-11.7	-68.7
-57.43	-11.7	-68.7
-57.43	-11.7	-68.7
-57.43	-11.7	-68.7
-57.43	-11.7	-68.7
-57.43	-11.7	-68.7
-57.43	-11.7	-280.8
-57.43	-11.7	-280.8
-57.43	-11.7	-280.8
-142.94	-229.7	-42.5
-142.94	-229.7	-42.5
-142.94	-229.7	-42.5
-142.94	-127.6	-364.6
-142.94	-127.6	-364.6
-142.94	-127.6	-31.9
-142.94	-127.6	-31.9
-382.87	-127.6	-31.9
-357.34	-30	-31.9
-255.24	-30	-31.9
-8.1	-30	-31.9
-8.1	-30	-31.9
-8.1	-30	-31.9
-8.1	-139.2	-31.9
-8.1	-139.2	-31.9
-8.1	-139.2	-31.9
-8.1	-139.2	-31.9
-8.1	-139.2	-31.9
-8.1	-139.2	-31.9
-8.1	-139.2	-31.9
-8.1	-139.2	-31.9
-8.1	-139.2	-31.9
-8.1	-139.2	-31.9
-8.1	-139.2	-31.9
-8.1	-139.2	-31.9
-8.1	-139.2	-31.9
-8.1	-139.2	-137.4
-8.1	-139.2	-137.4
-162.43	-139.2	-137.4
-162.43	-139.2	-137.4
-162.43	-139.2	-137.4
-319.06	-139.2	-137.4
-311.97	-139.2	-137.4
-311.97	-139.2	-25.5
-311.97	-139.2	-25.5
-11.1	-114.9	-25.5
-11.1	-114.9	-25.5
-11.1	-114.9	-25.5
-11.1	-114.9	-25.5
-11.1	-114.9	-25.5
-11.1	-114.9	-25.5
-11.1	-18.2	-25.5
-11.1	-18.2	-25.5
-11.1	-18.2	-25.5
-11.1	-18.2	-25.5
-11.1	-18.2	-25.5
-11.1	-18.2	-25.5
-11.1	-18.2	-25.5
-127.62	-18.2	-25.5
-127.62	-18.2	-25.5
-127.62	-18.2	-25.5
-127.62	-18.2	-25.5
-127.62	-18.2	-25.5
-127.62	-46.7	-25.5
-7.98	-46.7	-25.5
-7.98	-46.7	-25.5
-7.98	-46.7	-170.2
-7.98	-46.7	-170.2
-7.98	-46.7	-170.2
-7.98	-46.7	-255.2
-7.98	-46.7	-255.2
-7.98	-46.7	-829.5
-7.98	-46.7	-829.5
-7.98	-46.7	-829.5
-7.98	-46.7	-829.5
-7.98	-46.7	-829.5
-7.98	-46.7	-232
-7.98	-46.7	-232
-7.98	-46.7	-232
-7.98	-46.7	-638.1
-7.98	-46.7	-51
-7.98	-46.7	-51
-25.78	-46.7	-51
-25.78	-536	-51
-25.78	-536	-51
-25.78	-536	-51
-25.78	-127.6	-51
-25.78	-127.6	-51
-25.78	-29.5	-51
-25.78	-29.5	-237
-25.78	-29.5	-237
-25.78	-29.5	-237
-25.78	-29.5	-237
-25.78	-29.5	-264.4
-25.78	-29.5	-264.4
-25.78	-29.5	-264.4
-25.78	-29.5	-264.4
-25.78	-29.5	-264.4
-25.78	-29.5	-264.4
-25.78	-29.5	-264.4
-25.78	-29.5	-264.4
-25.78	-29.5	-60.1
-25.78	-29.5	-60.1
-25.78	-162.4	-60.1
-25.78	-162.4	-60.1
-25.78	-162.4	-60.1
-25.78	-69.6	-60.1
-25.78	-69.6	-60.1
-25.78	-69.6	-60.1
-25.78	-69.6	-60.1
-510.49	-69.6	-60.1
-18.5	-69.6	-255.2
-18.5	-145.9	-255.2
-18.5	-145.9	-255.2
-18.5	-586.1	-765.7
-18.5	-586.1	-3.9
-18.5	-586.1	-3.9
-18.5	-586.1	-3.9
-18.5	-586.1	-3.9
-18.5	-586.1	-3.9
-18.5	-586.1	-3.9
-18.5	-586.1	-3.9
-18.5	-586.1	-3.9
-18.5	-586.1	-3.9
-18.5	-586.1	-3.9
-18.5	-586.1	-3.9
-18.5	-586.1	-3.9
-18.5	-586.1	-3.9
-18.5	-586.1	-3.9
-18.5	-116	-3.9
-18.5	-116	-3.9
-18.5	-116	-3.9
-18.5	-116	-3.9
-18.5	-116	-3.9
-18.5	-116	-3.9
-18.5	-116	-3.9
-18.5	-116	-3.9
-18.5	-116	-3.9
-18.5	-116	-3.9
-18.5	-116	-3.9
-18.5	-116	-3.9
-18.5	-116	-3.9
-18.5	-20.3	-3.9
-18.5	-20.3	-3.9
-18.5	-20.3	-3.9
-18.5	-20.3	-3.9
-18.5	-20.3	-3.9
-18.5	-20.3	-3.9
-18.5	-20.3	-3.9
-18.5	-20.3	-3.9
-18.5	-20.3	-3.9
-212.7	-20.3	-3.9
-212.7	-20.3	-3.9
-9.69	-20.3	-3.9
-9.69	-20.3	-3.9
-9.69	-20.3	-3.9
-9.69	-20.3	-3.9
-9.69	-20.3	-3.9
-9.69	-20.3	-3.9
-9.69	-20.3	-3.9
-9.69	-742.5	-3.9
-9.69	-742.5	-3.9
-9.69	-742.5	-3.9
-9.69	-553	-3.9
-9.69	-553	-3.9
-9.69	-306.3	-3.9
-9.69	-408.4	-3.9
-9.69	-255.2	-3.9
-9.69	-255.2	-3.9
-9.69	-255.2	-3.9
-9.69	-43.8	-3.9
-9.69	-43.8	-91.2
-9.69	-43.8	-91.2
-9.69	-43.8	-91.2
-9.69	-43.8	-91.2
-9.69	-43.8	-8.4
-765.73	-43.8	-8.4
-364.64	-43.8	-8.4
-364.64	-43.8	-8.4
-364.64	-43.8	-8.4
-364.64	-43.8	-8.4
-375.36	-43.8	-8.4
-375.36	-43.8	-8.4
-375.36	-43.8	-8.4
-375.36	-43.8	-8.4
-375.36	-43.8	-8.4
-120.12	-43.8	-8.4
-120.12	-43.8	-8.4
-120.12	-43.8	-8.4
-120.12	-43.8	-8.4
-120.12	-43.8	-8.4
-816.78	-43.8	-8.4
-102.1	-43.8	-8.4
-18.56	-43.8	-8.4
-18.56	-43.8	-8.4
-18.56	-43.8	-8.4
-18.56	-43.8	-8.4
-18.56	-43.8	-8.4
-18.56	-29.2	-8.4
-18.56	-29.2	-8.4
-18.56	-29.2	-8.4
-18.56	-29.2	-478.6
-18.56	-29.2	-478.6
-18.56	-29.2	-478.6
-18.56	-29.2	-478.6
-18.56	-29.2	-478.6
-18.56	-29.2	-340.3
-18.56	-29.2	-340.3
-18.56	-34.6	-127.6
-132.02	-34.6	-127.6
-132.02	-34.6	-162.4
-132.02	-34.6	-162.4
-132.02	-34.6	-162.4
-132.02	-34.6	-340.3
-132.02	-34.6	-340.3
-132.02	-34.6	-340.3
-132.02	-34.6	-446.7
-561.54	-34.6	-85.1
-446.68	-34.6	-85.1
-446.68	-34.6	-85.1
-26.4	-34.6	-480.5
-26.4	-34.6	-480.5
-26.4	-34.6	-480.5
-26.4	-34.6	-480.5
-26.4	-34.6	-480.5
-26.4	-34.6	-301.7
-26.4	-34.6	-301.7
-26.4	-34.6	-301.7
-6.9	-34.6	-63.8
-6.9	-34.6	-63.8
-6.9	-34.6	-63.8
-6.9	-34.6	-290.5
-6.9	-34.6	-290.5
-6.9	-34.6	-290.5
-6.9	-34.6	-290.5
-6.9	-34.6	-290.5
-6.9	-34.6	-290.5
-6.9	-34.6	-290.5
-6.9	-34.6	-290.5
-6.9	-34.6	-7.5
-6.9	-34.6	-7.5
-6.9	-34.6	-7.5
-6.9	-34.6	-7.5
-6.9	-34.6	-7.5
-6.9	-34.6	-7.5
-6.9	-34.6	-7.5
-6.9	-34.6	-7.5
-6.9	-34.6	-7.5
-6.9	-34.6	-7.5
-220.44	-34.6	-7.5
-220.44	-34.6	-7.5
-220.44	-34.6	-7.5
-220.44	-34.6	-7.5
-220.44	-34.6	-7.5
-220.44	-34.6	-7.5
-499.39	-34.6	-7.5
-499.39	-34.6	-7.5
-499.39	-34.6	-7.5
-499.39	-34.6	-7.5
-499.39	-190.4	-7.5
-499.39	-190.4	-7.5
-499.39	-190.4	-7.5
-198.52	-190.4	-7.5
-198.52	-190.4	-7.5
-198.52	-190.4	-7.5
-255.24	-190.4	-7.5
-85.08	-190.4	-7.5
-85.08	-190.4	-7.5
-484.97	-190.4	-489.2
-484.97	-190.4	-489.2
-484.97	-190.4	-489.2
-484.97	-190.4	-127.6
-484.97	-190.4	-127.6
-484.97	-190.4	-406.5
-1340.03	-190.4	-406.5
-145.85	-190.4	-406.5
-145.85	-234	-406.5
-145.85	-234	-406.5
-145.85	-234	-406.5
-95.72	-319.1	-406.5
-95.72	-183.5	-406.5
-95.72	-183.5	-319.1
-95.72	-183.5	-319.1
-5.49	-183.5	-680.7
-5.49	-183.5	-680.7
-5.49	-183.5	-680.7
-5.49	-183.5	-580.1
-5.49	-183.5	-580.1
-5.49	-183.5	-580.1
-5.49	-150.8	-328.2
-5.49	-150.8	-328.2
-5.49	-150.8	-99.9
-5.49	-150.8	-99.9
-5.49	-150.8	-99.9
-5.49	-150.8	-99.9
-5.49	-170.2	-99.9
-5.49	-170.2	-99.9
-5.49	-166.2	-99.9
-5.49	-166.2	-328.2
-5.49	-166.2	-328.2
-5.49	-166.2	-247
-5.49	-166.2	-247
-5.49	-166.2	-247
-5.49	-166.2	-247
-5.49	-166.2	-247
-5.49	-166.2	-247
-5.49	-166.2	-247
-5.49	-166.2	-247
-5.49	-166.2	-247
-5.49	-166.2	-182.3
-99.26	-166.2	-182.3
-99.26	-166.2	-182.3
-99.26	-166.2	-182.3
-99.26	-166.2	-182.3
-99.26	-166.2	-182.3
-10.21	-166.2	-182.3
-10.21	-166.2	-182.3
-10.21	-166.2	-96.8
-10.21	-166.2	-96.8
-10.21	-166.2	-96.8
-10.21	-166.2	-96.8
-10.21	-166.2	-96.8
-10.21	-312	-96.8
-10.21	-312	-96.8
-10.21	-312	-96.8
-10.21	-16	-561.5
-10.21	-16	-255.2
-10.21	-16	-127.6
-10.21	-16	-127.6
-76.13	-16	-127.6
-76.13	-16	-191.4
-76.13	-16	-191.4
-76.13	-16	-191.4
-76.13	-16	-191.4
-76.13	-16	-191.4
-76.13	-16	-191.4
-76.13	-16	-191.4
-76.13	-16	-57.2
-76.13	-16	-57.2
-76.13	-8.7	-57.2
-76.13	-8.7	-57.2
-76.13	-8.7	-57.2
-76.13	-8.7	-57.2
-76.13	-8.7	-57.2
-76.13	-8.7	-57.2
-255.24	-8.7	-57.2
-255.24	-8.7	-57.2
-188.08	-8.7	-57.2
-188.08	-8.7	-57.2
-188.08	-8.7	-57.2
-188.08	-8.7	-57.2
-188.08	-8.7	-57.2
-42.54	-8.7	-57.2
-42.54	-8.7	-57.2
-42.54	-8.7	-765.7
-42.54	-8.7	-765.7
-42.54	-78.5	-765.7
-42.54	-78.5	-218.8
-42.54	-78.5	-218.8
-42.54	-78.5	-153.1
-42.54	-201.8	-216
-42.54	-201.8	-216
-42.54	-201.8	-216
-42.54	-201.8	-216
-42.54	-201.8	-38.7
-42.54	-201.8	-38.7
-42.54	-201.8	-38.7
-42.54	-201.8	-38.7
-42.54	-201.8	-38.7
-42.54	-201.8	-38.7
-42.54	-201.8	-38.7
-42.54	-201.8	-38.7
-42.54	-31.9	-38.7
-42.54	-31.9	-58.9
-42.54	-31.9	-58.9
-42.54	-31.9	-58.9
-42.54	-31.9	-58.9
-42.54	-255.2	-58.9
-42.54	-26.9	-58.9
-42.54	-26.9	-58.9
-42.54	-26.9	-21.9
-42.54	-26.9	-21.9
-42.54	-26.9	-21.9
-533.69	-26.9	-21.9
-533.69	-26.9	-21.9
-533.69	-26.9	-21.9
-533.69	-26.9	-21.9
-533.69	-26.9	-21.9
-533.69	-26.9	-21.9
-542.4	-26.9	-21.9
-542.4	-26.9	-21.9
-146.96	-26.9	-21.9
-146.96	-26.9	-21.9
-146.96	-26.9	-21.9
-146.96	-291.7	-21.9
-146.96	-291.7	-21.9
-146.96	-21.3	-21.9
-146.96	-21.3	-21.9
-146.96	-21.3	-21.9
-146.96	-21.3	-21.9
-159.53	-21.3	-21.9
-159.53	-21.3	-21.9
-159.53	-21.3	-21.9
-159.53	-170.2	-21.9
-159.53	-170.2	-21.9
-654.06	-351	-21.9
-654.06	-351	-21.9
-654.06	-351	-21.9
-654.06	-351	-21.9
-654.06	-351	-21.9
-8.65	-21.9	-21.9
-8.65	-21.9	-21.9
-8.65	-21.9	-21.9
-8.65	-21.9	-21.9
-8.65	-21.9	-21.9
-8.65	-21.9	-21.9
-8.65	-21.9	-21.9
-8.65	-21.9	-21.9
-8.65	-21.9	-21.9
-8.65	-21.9	-21.9
-8.65	-21.9	-21.9
-8.65	-21.9	-21.9
-8.65	-21.9	-21.9
-8.65	-21.9	-21.9
-8.65	-21.9	-21.9
-8.65	-21.9	-21.9
-8.65	-21.9	-21.9
-306.29	-21.9	-21.9
-153.15	-21.9	-21.9
-145.85	-21.9	-21.9
-145.85	-255.2	-21.9
-145.85	-153.1	-21.9
-145.85	-153.1	-21.9
-45.38	-153.1	-21.9
-45.38	-153.1	-21.9
-45.38	-153.1	-21.9
-45.38	-153.1	-21.9
-45.38	-255.2	-21.9
-45.38	-510.5	-21.9
-45.38	-510.5	-21.9
-45.38	-232	-102.1
-45.38	-232	-795.8
-45.38	-232	-795.8
-45.38	-446.7	-795.8
-45.38	-255.2	-795.8
-45.38	-255.2	-795.8
-85.08	-324.9	-255.2
-85.08	-324.9	-255.2
-85.08	-324.9	-28.6
-98.17	-109.4	-28.6
-98.17	-109.4	-28.6
-98.17	-316.5	-28.6
-98.17	-316.5	-28.6
-20.42	-316.5	-28.6
-20.42	-316.5	-28.6
-20.42	-316.5	-28.6
-20.42	-316.5	-28.6
-20.42	-316.5	-28.6
-20.42	-91.2	-28.6
-20.42	-91.2	-28.6
-148.89	-91.2	-28.6
-148.89	-91.2	-28.6
-148.89	-331.8	-28.6
-20.7	-331.8	-28.6
-20.7	-331.8	-28.6
-20.7	-287.2	-28.6
-20.7	-287.2	-28.6
-20.7	-297.8	-28.6
-20.7	-297.8	-28.6
-20.7	-198.5	-28.6
-20.7	-198.5	-28.6
-20.7	-198.5	-28.6
-20.7	-6.3	-28.6
-20.7	-6.3	-28.6
-459.44	-6.3	-28.6
-303.1	-6.3	-28.6
-303.1	-6.3	-28.6
-303.1	-6.3	-28.6
-303.1	-6.3	-28.6
-303.1	-6.3	-28.6
-149.82	-6.3	-28.6
-149.82	-6.3	-170.2
-149.82	-6.3	-170.2
-149.82	-6.3	-170.2
-149.82	-6.3	-170.2
-149.82	-6.3	-40.3
-149.82	-6.3	-40.3
-149.82	-6.3	-40.3
-149.82	-6.3	-40.3
-149.82	-6.3	-40.3
-149.82	-6.3	-366.9
-149.82	-6.3	-366.9
-149.82	-6.3	-366.9
-565.18	-6.3	-366.9
-565.18	-6.3	-366.9
-565.18	-6.3	-191.4
-565.18	-6.3	-191.4
-565.18	-6.3	-12.9
-565.18	-6.3	-12.9
-565.18	-6.3	-12.9
-565.18	-6.3	-12.9
-68.07	-6.3	-12.9
-68.07	-6.3	-12.9
-68.07	-6.3	-12.9
-68.07	-6.3	-12.9
-28.65	-6.3	-12.9
-28.65	-6.3	-12.9
-28.65	-6.3	-12.9
-28.65	-6.3	-12.9
-28.65	-6.3	-12.9
-28.65	-6.3	-12.9
-28.65	-6.3	-12.9
-28.65	-6.3	-12.9
-28.65	-6.3	-12.9
-28.65	-6.3	-12.9
-28.65	-6.3	-12.9
-28.65	-6.3	-12.9
-28.65	-6.3	-12.9
-28.65	-6.3	-12.9
-28.65	-6.3	-12.9
-28.65	-6.3	-12.9
-28.65	-6.3	-12.9
-28.65	-6.3	-12.9
-28.65	-6.3	-12.9
-28.65	-6.3	-12.9
-28.65	-6.3	-12.9
-28.65	-6.3	-12.9
-28.65	-6.3	-12.9
-28.65	-6.3	-12.9
-28.65	-6.3	-12.9
-28.65	-6.3	-12.9
-28.65	-6.3	-214.9
-28.65	-6.3	-214.9
-714.69	-6.3	-214.9
-95.72	-6.3	-214.9
-95.72	-6.3	-214.9
-595.57	-6.3	-638.1
-34.81	-6.3	-638.1
-34.81	-6.3	-89.3
-34.81	-6.3	-89.3
-34.81	-6.3	-89.3
-34.81	-6.3	-89.3
-34.81	-6.3	-89.3
-34.81	-6.3	-89.3
-34.81	-6.3	-255.2
-34.81	-6.3	-319.1
-34.81	-6.3	-127.6
-34.81	-6.3	-127.6
-34.81	-6.3	-127.6
-34.81	-6.3	-127.6
-23.93	-6.3	-127.6
-23.93	-6.3	-127.6
-23.93	-6.3	-127.6
-23.93	-6.3	-127.6
-23.93	-69	-127.6
-23.93	-69	-113.4
-23.93	-69	-113.4
-23.93	-69	-113.4
-23.93	-69	-113.4
-48.29	-69	-113.4
-48.29	-69	-105.1
-48.29	-69	-105.1
-48.29	-69	-105.1
-48.29	-69	-105.1
-48.29	-69	-105.1
-48.29	-19.6	-105.1
-48.29	-19.6	-105.1
-48.29	-19.6	-105.1
-48.29	-19.6	-105.1
-48.29	-19.6	-105.1
-15.31	-19.6	-61.3
-15.31	-19.6	-61.3
-15.31	-98.8	-61.3
-15.31	-98.8	-61.3
-15.31	-98.8	-61.3
-15.31	-98.8	-61.3
-15.31	-98.8	-61.3
-15.31	-98.8	-21.9
-15.31	-98.8	-21.9
-15.31	-98.8	-21.9
-15.31	-98.8	-21.9
-15.31	-510.5	-21.9
-15.31	-19.6	-21.9
-15.31	-19.6	-21.9
-155.98	-19.6	-21.9
-155.98	-19.6	-21.9
-155.98	-19.6	-21.9
-155.98	-19.6	-21.9
-155.98	-19.6	-21.9
-157.07	-19.6	-21.9
-157.07	-19.6	-21.9
-157.07	-19.6	-21.9
-157.07	-19.6	-21.9
-437.56	-118.4	-21.9
-437.56	-118.4	-21.9
-437.56	-118.4	-21.9
-437.56	-118.4	-21.9
-55.49	-118.4	-21.9
-55.49	-118.4	-21.9
-55.49	-118.4	-21.9
-55.49	-118.4	-21.9
-55.49	-118.4	-21.9
-55.49	-118.4	-21.9
-55.49	-118.4	-21.9
-182.32	-118.4	-21.9
-182.32	-118.4	-21.9
-22.2	-118.4	-21.9
-22.2	-118.4	-21.9
-22.2	-118.4	-21.9
-22.2	-118.4	-21.9
-22.2	-118.4	-21.9
-22.2	-118.4	-21.9
-22.2	-118.4	-21.9
-935.9	-64.9	-21.9
-54.7	-64.9	-21.9
-54.7	-64.9	-21.9
-54.7	-64.9	-21.9
-54.7	-64.9	-21.9
-54.7	-64.9	-21.9
-54.7	-64.9	-21.9
-54.7	-64.9	-21.9
-54.7	-64.9	-21.9
-33.58	-64.9	-21.9
-33.58	-64.9	-21.9
-33.58	-64.9	-21.9
-33.58	-64.9	-21.9
-33.58	-64.9	-21.9
-33.58	-64.9	-21.9
-33.58	-64.9	-21.9
-33.58	-64.9	-21.9
-33.58	-364.6	-21.9
-33.58	-364.6	-21.9
-33.58	-85.1	-21.9
-306.29	-85.1	-21.9
-306.29	-85.1	-21.9
-306.29	-85.1	-21.9
-148.89	-85.1	-21.9
-148.89	-85.1	-135.1
-148.89	-85.1	-135.1
-364.64	-303.1	-135.1
-364.64	-303.1	-135.1
-58.9	-303.1	-135.1
-58.9	-303.1	-6.6
-58.9	-303.1	-6.6
-58.9	-351	-6.6
-127.62	-351	-6.6
-127.62	-187.2	-6.6
-29.87	-187.2	-6.6
-29.87	-187.2	-6.6
-29.87	-187.2	-6.6
-29.87	-865.6	-6.6
-29.87	-865.6	-6.6
-29.87	-865.6	-6.6
-29.87	-865.6	-6.6
-29.87	-865.6	-6.6
-29.87	-865.6	-6.6
-29.87	-865.6	-6.6
-29.87	-319.1	-6.6
-29.87	-319.1	-6.6
-29.87	-127.6	-6.6
-29.87	-127.6	-6.6
-29.87	-85.1	-6.6
-29.87	-85.1	-6.6
-29.87	-127.6	-6.6
-29.87	-127.6	-5.6
-29.87	-127.6	-5.6
-29.87	-21.3	-5.6
-29.87	-21.3	-5.6
-29.87	-21.3	-5.6
-29.87	-21.3	-5.6
-29.87	-21.3	-5.6
-29.87	-21.3	-5.6
-29.87	-21.3	-5.6
-29.87	-218.8	-5.6
-7.81	-218.8	-5.6
-7.81	-691.5	-5.6
-7.81	-691.5	-5.6
-7.81	-691.5	-5.6
-7.81	-691.5	-5.6
-7.81	-691.5	-5.6
-7.81	-691.5	-5.6
-7.81	-691.5	-5.6
-7.81	-691.5	-5.6
-7.81	-691.5	-5.6
-7.81	-691.5	-5.6
-7.81	-691.5	-5.6
-7.81	-691.5	-5.6
-7.81	-691.5	-5.6
-7.81	-691.5	-5.6
-7.81	-691.5	-5.6
-7.81	-691.5	-5.6
-7.81	-119.1	-5.6
-7.81	-119.1	-5.6
-7.81	-119.1	-5.6
-7.81	-119.1	-5.6
-7.81	-119.1	-5.6
-7.81	-119.1	-5.6
-7.81	-119.1	-5.6
-7.81	-119.1	-5.6
-7.81	-119.1	-5.6
-7.81	-510.5	-5.6
-7.81	-510.5	-5.6
-9.45	-510.5	-5.6
-9.45	-20.4	-71.6
-9.45	-20.4	-71.6
-9.45	-20.4	-71.6
-9.45	-20.4	-71.6
-9.45	-20.4	-71.6
-9.45	-20.4	-71.6
-9.45	-20.4	-71.6
-9.45	-446.7	-71.6
-9.45	-446.7	-71.6
-9.45	-136.1	-71.6
-9.45	-136.1	-71.6
-9.45	-136.1	-71.6
-9.45	-136.1	-71.6
-9.45	-136.1	-71.6
-86.89	-136.1	-71.6
-86.89	-136.1	-71.6
-86.89	-136.1	-71.6
-86.89	-136.1	-71.6
-86.89	-72.3	-71.6
-86.89	-72.3	-71.6
-86.89	-72.3	-71.6
-86.89	-72.3	-71.6
-86.89	-72.3	-71.6
-86.89	-72.3	-735.7
-86.89	-72.3	-735.7
-86.89	-72.3	-735.7
-86.89	-72.3	-735.7
-11.1	-72.3	-735.7
-11.1	-72.3	-1191.1
-11.1	-72.3	-619.9
-11.1	-72.3	-619.9
-11.1	-72.3	-1063.5
-11.1	-72.3	-1063.5
-11.1	-72.3	-893.4
-11.1	-72.3	-893.4
-11.1	-170.2	-159.5
-11.1	-170.2	-159.5
-11.1	-170.2	-159.5
-11.1	-170.2	-159.5
-11.1	-53.7	-159.5
-11.1	-53.7	-978.4
-11.1	-53.7	-978.4
-11.1	-53.7	-324.9
-11.1	-53.7	-324.9
-11.1	-397	-324.9
-11.1	-397	-16.2
-11.1	-397	-16.2
-175.48	-397	-16.2
-175.48	-397	-16.2
-175.48	-201.5	-16.2
-175.48	-201.5	-16.2
-175.48	-201.5	-16.2
-55.49	-201.5	-16.2
-55.49	-201.5	-16.2
-55.49	-201.5	-16.2
-55.49	-201.5	-16.2
-55.49	-201.5	-16.2
-55.49	-201.5	-16.2
-55.49	-201.5	-16.2
-93.59	-201.5	-16.2
-93.59	-79.8	-16.2
-93.59	-79.8	-16.2
-93.59	-79.8	-16.2
-93.59	-79.8	-16.2
-93.59	-79.8	-16.2
-93.59	-79.8	-16.2
-93.59	-79.8	-16.2
-93.59	-79.8	-16.2
-19.63	-79.8	-16.2
-19.63	-115.3	-16.2
-19.63	-115.3	-16.2
-19.63	-115.3	-16.2
-19.63	-115.3	-16.2
-19.63	-115.3	-16.2
-19.63	-115.3	-16.2
-19.63	-115.3	-16.2
-19.63	-115.3	-16.2
-19.63	-115.3	-16.2
-19.63	-516.2	-16.2
-19.63	-516.2	-16.2
-19.63	-516.2	-16.2
-19.63	-516.2	-16.2
-19.63	-516.2	-16.2
-52.21	-516.2	-16.2
-52.21	-516.2	-16.2
-52.21	-516.2	-16.2
-52.21	-516.2	-16.2
-52.21	-516.2	-16.2
-52.21	-516.2	-16.2
-52.21	-516.2	-16.2
-52.21	-516.2	-37.3
-52.21	-516.2	-37.3
-52.21	-516.2	-37.3
-52.21	-516.2	-37.3
-52.21	-516.2	-37.3
-52.21	-516.2	-37.3
-25.16	-516.2	-37.3
-25.16	-516.2	-37.3
-25.16	-516.2	-37.3
-25.16	-516.2	-37.3
-25.16	-516.2	-37.3
-25.16	-516.2	-37.3
-25.16	-516.2	-37.3
-25.16	-516.2	-37.3
-25.16	-255.2	-37.3
-25.16	-255.2	-37.3
-25.16	-255.2	-37.3
-25.16	-527.5	-37.3
-25.16	-527.5	-37.3
-25.16	-527.5	-37.3
-25.16	-527.5	-37.3
-25.16	-255.2	-37.3
-25.16	-255.2	-37.3
-25.16	-255.2	-37.3
-25.16	-255.2	-37.3
-25.16	-255.2	-510.5
-119.11	-255.2	-425.4
-119.11	-255.2	-425.4
-119.11	-354.5	-425.4
-119.11	-354.5	-333.8
-701.92	-354.5	-333.8
-170.16	-354.5	-333.8
-170.16	-354.5	-333.8
-255.24	-255.2	-189.8
-221.95	-255.2	-189.8
-221.95	-255.2	-189.8
-221.95	-638.1	-189.8
-221.95	-474	-189.8
-221.95	-474	-189.8
-221.95	-85.1	-189.8
-221.95	-85.1	-189.8
-25.52	-85.1	-189.8
-25.52	-85.1	-189.8
-25.52	-85.1	-189.8
-25.52	-85.1	-14.6
-25.52	-85.1	-14.6
-25.52	-19.6	-14.6
-25.52	-19.6	-14.6
-25.52	-19.6	-14.6
-25.52	-19.6	-14.6
-116.02	-19.6	-14.6
-116.02	-19.6	-14.6
-116.02	-19.6	-14.6
-401.1	-85.1	-14.6
-401.1	-85.1	-306.3
-340.33	-85.1	-306.3
-340.33	-12.8	-306.3
-340.33	-12.8	-22.5
-340.33	-12.8	-22.5
-340.33	-12.8	-22.5
-340.33	-12.8	-22.5
-574.3	-12.8	-22.5
-574.3	-12.8	-22.5
-574.3	-12.8	-22.5
-574.3	-12.8	-22.5
-574.3	-12.8	-22.5
-9.45	-12.8	-22.5
-9.45	-153.1	-30
-9.45	-153.1	-30
-9.45	-153.1	-30
-9.45	-79.8	-30
-9.45	-79.8	-30
-9.45	-79.8	-148.9
-9.45	-79.8	-148.9
-9.45	-79.8	-148.9
-9.45	-26.9	-148.9
-9.45	-26.9	-148.9
-9.45	-26.9	-148.9
-9.45	-26.9	-148.9
-9.45	-26.9	-38.3
-9.45	-382.9	-38.3
-44.57	-382.9	-38.3
-44.57	-816.8	-38.3
-44.57	-816.8	-38.3
-44.57	-816.8	-38.3
-44.57	-816.8	-127.6
-44.57	-816.8	-127.6
-44.57	-816.8	-127.6
-44.57	-239.8	-127.6
-44.57	-239.8	-127.6
-44.57	-239.8	-290.1
-44.57	-239.8	-290.1
-44.57	-239.8	-290.1
-44.57	-239.8	-290.1
-44.57	-239.8	-290.1
-44.57	-239.8	-290.1
-44.57	-239.8	-1217.3
-44.57	-465.4	-1217.3
-44.57	-465.4	-1217.3
-127.62	-465.4	-1217.3
-127.62	-465.4	-1109
-127.62	-465.4	-1109
-127.62	-266.8	-1109
-127.62	-266.8	-1109
-127.62	-266.8	-1109
-335.85	-266.8	-1109
-335.85	-266.8	-1109
-335.85	-266.8	-1109
-335.85	-68.1	-290.1
-335.85	-68.1	-290.1
-212.7	-68.1	-290.1
-212.7	-68.1	-290.1
-212.7	-243.1	-290.1
-212.7	-243.1	-290.1
-212.7	-243.1	-37.4
-401.1	-243.1	-37.4
-401.1	-243.1	-37.4
-401.1	-243.1	-37.4
-401.1	-243.1	-37.4
-401.1	-243.1	-37.4
-401.1	-243.1	-37.4
-401.1	-243.1	-37.4
-401.1	-243.1	-37.4
-226.88	-243.1	-37.4
-226.88	-240.9	-37.4
-226.88	-240.9	-37.4
-106.35	-240.9	-232
-106.35	-240.9	-232
-106.35	-240.9	-232
-106.35	-240.9	-11.6
-106.35	-240.9	-11.6
-106.35	-240.9	-11.6
-106.35	-240.9	-11.6
-106.35	-240.9	-11.6
-106.35	-240.9	-11.6
-106.35	-240.9	-11.6
-106.35	-240.9	-11.6
-106.35	-240.9	-11.6
-106.35	-240.9	-11.6
-106.35	-240.9	-11.6
-106.35	-240.9	-11.6
-106.35	-240.9	-11.6
-106.35	-240.9	-140
-155.98	-240.9	-140
-155.98	-54	-140
-155.98	-54	-140
-155.98	-54	-140
-155.98	-54	-140
-29.45	-54	-140
-29.45	-54	-140
-29.45	-54	-140
-29.45	-54	-40.5
-29.45	-54	-40.5
-29.45	-54	-40.5
-29.45	-54	-40.5
-788.94	-54	-40.5
-788.94	-54	-40.5
-788.94	-54	-40.5
-51.66	-54	-40.5
-51.66	-688.1	-40.5
-51.66	-688.1	-40.5
-51.66	-688.1	-40.5
-51.66	-688.1	-40.5
-51.66	-688.1	-40.5
-51.66	-688.1	-40.5
-51.66	-688.1	-40.5
-51.66	-471.2	-40.5
-51.66	-471.2	-40.5
-51.66	-471.2	-40.5
-51.66	-471.2	-40.5
-51.66	-92.8	-40.5
-51.66	-92.8	-40.5
-51.66	-92.8	-40.5
-51.66	-20.7	-40.5
-51.66	-20.7	-40.5
-51.66	-20.7	-40.5
-51.66	-20.7	-40.5
-51.66	-20.7	-40.5
-51.66	-20.7	-40.5
-51.66	-20.7	-40.5
-51.66	-20.7	-40.5
-51.66	-20.7	-40.5
-198.52	-20.7	-40.5
-198.52	-20.7	-40.5
-198.52	-351	-40.5
-191.43	-351	-40.5
-13.43	-23.2	-40.5
-13.43	-23.2	-40.5
-13.43	-23.2	-40.5
-13.43	-23.2	-40.5
-13.43	-23.2	-40.5
-13.43	-23.2	-40.5
-13.43	-23.2	-40.5
-13.43	-23.2	-40.5
-13.43	-23.2	-40.5
-13.43	-116	-40.5
-13.43	-116	-40.5
-13.43	-116	-40.5
-13.43	-147.8	-40.5
-13.43	-147.8	-40.5
-13.43	-147.8	-40.5
-13.43	-147.8	-40.5
-76.57	-147.8	-40.5
-76.57	-31.1	-40.5
-76.57	-31.1	-40.5
-8.8	-31.1	-40.5
-8.8	-31.1	-40.5
-8.8	-31.1	-40.5
-8.8	-31.1	-40.5
-8.8	-31.1	-40.5
-8.8	-31.1	-40.5
-8.8	-31.1	-40.5
-8.8	-31.1	-40.5
-8.8	-31.1	-40.5
-8.8	-31.1	-40.5
-8.8	-31.1	-40.5
-8.8	-31.1	-40.5
-8.8	-31.1	-40.5
-8.8	-31.1	-40.5
-8.8	-31.1	-40.5
-8.8	-31.1	-40.5
-8.8	-31.1	-40.5
-170.16	-31.1	-40.5
-170.16	-31.1	-40.5
-170.16	-31.1	-40.5
-8.1	-31.1	-40.5
-8.1	-31.1	-40.5
-8.1	-31.1	-67.2
-8.1	-31.1	-67.2
-8.1	-31.1	-67.2
-8.1	-31.1	-67.2
-8.1	-31.1	-67.2
-8.1	-31.1	-67.2
-8.1	-31.1	-67.2
-8.1	-31.1	-67.2
-8.1	-31.1	-67.2
-8.1	-139.2	-67.2
-8.1	-139.2	-67.2
-8.1	-139.2	-67.2
-8.1	-102.1	-67.2
-8.1	-102.1	-67.2
-8.1	-102.1	-67.2
-8.1	-102.1	-67.2
-170.16	-268.7	-110.6
-170.16	-268.7	-110.6
-510.49	-268.7	-110.6
-510.49	-268.7	-110.6
-1042.25	-268.7	-110.6
-1042.25	-21.3	-110.6
-1042.25	-21.3	-110.6
-255.24	-21.3	-110.6
-255.24	-21.3	-110.6
-255.24	-21.3	-40.3
-59.36	-21.3	-40.3
-59.36	-21.3	-40.3
-59.36	-222	-40.3
-59.36	-222	-40.3
-59.36	-222	-40.3
-59.36	-222	-40.3
-59.36	-222	-40.3
-59.36	-222	-40.3
-59.36	-222	-40.3
-59.36	-82	-40.3
-59.36	-82	-312
-59.36	-82	-312
-11.1	-82	-312
-11.1	-82	-30.9
-11.1	-82	-30.9
-11.1	-82	-30.9
-11.1	-82	-30.9
-11.1	-255.2	-30.9
-11.1	-255.2	-30.9
-11.1	-255.2	-30.9
-11.1	-425.4	-30.9
-11.1	-42.5	-30.9
-11.1	-42.5	-175.5
-11.1	-42.5	-175.5
-11.1	-42.5	-175.5
-11.1	-42.5	-175.5
-11.1	-42.5	-175.5
-11.1	-42.5	-538.9
-11.1	-42.5	-538.9
-11.1	-42.5	-538.9
-11.1	-42.5	-510.5
-11.1	-42.5	-39.3
-11.1	-42.5	-39.3
-11.1	-42.5	-39.3
-11.1	-42.5	-39.3
-11.1	-78.1	-39.3
-11.1	-78.1	-39.3
-11.1	-78.1	-39.3
-85.08	-78.1	-440.9
-85.08	-78.1	-440.9
-85.08	-78.1	-440.9
-5.46	-78.1	-92.8
-5.46	-78.1	-92.8
-5.46	-78.1	-92.8
-5.46	-78.1	-548.3
-5.46	-78.1	-548.3
-5.46	-78.1	-548.3
-5.46	-78.1	-548.3
-5.46	-78.1	-548.3
-5.46	-229.7	-548.3
-5.46	-229.7	-548.3
-5.46	-229.7	-548.3
-5.46	-364.6	-71.6
-5.46	-364.6	-71.6
-5.46	-68.1	-71.6
-5.46	-68.1	-71.6
-5.46	-68.1	-71.6
-5.46	-68.1	-71.6
-5.46	-574.3	-71.6
-5.46	-204.2	-71.6
-5.46	-204.2	-71.6
-5.46	-204.2	-71.6
-5.46	-204.2	-71.6
-5.46	-157.1	-71.6
-5.46	-157.1	-71.6
-5.46	-157.1	-71.6
-5.46	-157.1	-71.6
-5.46	-157.1	-71.6
-5.46	-157.1	-99.9
-5.46	-157.1	-99.9
-5.46	-437.6	-99.9
-5.46	-437.6	-99.9
-5.46	-510.5	-99.9
-5.46	-314.1	-99.9
-5.46	-314.1	-99.9
-5.46	-314.1	-99.9
-5.46	-314.1	-99.9
-5.46	-319.1	-99.9
-5.46	-319.1	-99.9
-5.46	-804.4	-99.9
-5.46	-804.4	-99.9
-5.46	-804.4	-99.9
-5.46	-804.4	-99.9
-5.46	-804.4	-99.9
-5.46	-804.4	-99.9
-5.46	-804.4	-99.9
-5.46	-804.4	-99.9
-5.46	-804.4	-99.9
-5.46	-272.3	-99.9
-5.46	-272.3	-99.9
-5.46	-272.3	-99.9
-5.46	-272.3	-99.9
-5.46	-239.3	-99.9
-5.46	-239.3	-99.9
-5.46	-239.3	-99.9
-71.79	-239.3	-62.1
-71.79	-239.3	-62.1
-71.79	-18.9	-62.1
-71.79	-18.9	-62.1
-71.79	-18.9	-62.1
-71.79	-18.9	-62.1
-71.79	-18.9	-62.1
-71.79	-18.9	-62.1
-71.79	-18.9	-62.1
-102.1	-18.9	-62.1
-5.7	-467.9	-62.1
-5.7	-467.9	-44.7
-5.7	-94.6	-44.7
-5.7	-94.6	-44.7
-5.7	-94.6	-44.7
-5.7	-94.6	-44.7
-5.7	-94.6	-44.7
-5.7	-94.6	-44.7
-5.7	-94.6	-44.7
-5.7	-94.6	-44.7
-5.7	-94.6	-44.7
-5.7	-94.6	-44.7
-5.7	-94.6	-680.7
-5.7	-94.6	-117.8
-5.7	-94.6	-117.8
-5.7	-94.6	-117.8
-5.7	-94.6	-117.8
-5.7	-94.6	-95.7
-5.7	-94.6	-95.7
-5.7	-94.6	-223.3
-5.7	-94.6	-223.3
-5.7	-94.6	-164.1
-5.7	-94.6	-164.1
-5.7	-94.6	-164.1
-5.7	-94.6	-164.1
-5.7	-94.6	-164.1
-5.7	-94.6	-164.1
-5.7	-36.5	-164.1
-5.7	-36.5	-164.1
-5.7	-36.5	-164.1
-5.7	-36.5	-164.1
-5.7	-36.5	-164.1
-5.7	-36.5	-164.1
-5.7	-36.5	-79.8
-5.7	-36.5	-79.8
-5.7	-36.5	-79.8
-5.7	-36.5	-79.8
-5.7	-36.5	-79.8
-5.7	-36.5	-79.8
-5.7	-36.5	-79.8
-5.7	-36.5	-79.8
-5.7	-36.5	-79.8
-5.7	-36.5	-153.1
-5.7	-36.5	-153.1
-5.7	-36.5	-153.1
-5.7	-36.5	-153.1
-5.7	-36.5	-78
-5.7	-36.5	-78
-5.7	-36.5	-78
-5.7	-97.2	-78
-5.7	-97.2	-78
-7.89	-97.2	-78
-7.89	-97.2	-78
-7.89	-97.2	-78
-7.89	-97.2	-78
-7.89	-18.2	-78
-7.89	-18.2	-626.5
-7.89	-18.2	-626.5
-7.89	-18.2	-626.5
-7.89	-18.2	-212.7
-7.89	-18.2	-212.7
-7.89	-18.2	-212.7
-7.89	-18.2	-212.7
-7.89	-18.2	-212.7
-7.89	-18.2	-127.6
-7.89	-18.2	-127.6
-7.89	-18.2	-127.6
-7.89	-18.2	-127.6
-7.89	-18.2	-1276.2
-7.89	-18.2	-226.9
-7.89	-18.2	-226.9
-7.89	-18.2	-226.9
-7.89	-18.2	-150.8
-7.89	-18.2	-150.8
-7.89	-18.2	-150.8
-7.89	-18.2	-150.8
-7.89	-18.2	-150.8
-7.89	-18.2	-150.8
-7.89	-18.2	-111
-199.94	-18.2	-111
-199.94	-18.2	-111
-199.94	-18.2	-111
-199.94	-18.2	-111
-199.94	-18.2	-111
-199.94	-18.2	-111
-199.94	-18.2	-217.4
-199.94	-18.2	-217.4
-199.94	-18.2	-217.4
-199.94	-18.2	-217.4
-199.94	-18.2	-217.4
-199.94	-18.2	-217.4
-199.94	-18.2	-217.4
-199.94	-18.2	-217.4
-199.94	-18.2	-432
-199.94	-18.2	-432
-199.94	-719.3	-432
-553.03	-719.3	-432
-553.03	-719.3	-191.4
-135.13	-719.3	-191.4
-135.13	-719.3	-191.4
-135.13	-719.3	-204.2
-135.13	-85.1	-204.2
-135.13	-85.1	-204.2
-425.41	-85.1	-340.3
-425.41	-85.1	-340.3
-446.68	-85.1	-340.3
-319.06	-106.7	-283.6
-75.07	-106.7	-283.6
-75.07	-106.7	-283.6
-75.07	-106.7	-255.2
-75.07	-106.7	-255.2
-75.07	-106.7	-255.2
-19.14	-106.7	-255.2
-19.14	-106.7	-255.2
-19.14	-106.7	-255.2
-19.14	-106.7	-360.3
-19.14	-106.7	-360.3
-19.14	-106.7	-360.3
-19.14	-106.7	-360.3
-19.14	-106.7	-360.3
-19.14	-106.7	-182.3
-19.14	-106.7	-182.3
-19.14	-107.5	-182.3
-3.57	-107.5	-182.3
-3.57	-107.5	-182.3
-3.57	-107.5	-182.3
-3.57	-107.5	-182.3
-3.57	-390.4	-182.3
-3.57	-390.4	-182.3
-3.57	-390.4	-182.3
-3.57	-390.4	-182.3
-3.57	-390.4	-182.3
-3.57	-191.4	-182.3
-3.57	-191.4	-182.3
-3.57	-191.4	-182.3
-3.57	-191.4	-182.3
-3.57	-191.4	-182.3
-3.57	-191.4	-182.3
-3.57	-191.4	-35.5
-3.57	-191.4	-35.5
-3.57	-191.4	-35.5
-3.57	-191.4	-35.5
-3.57	-191.4	-35.5
-3.57	-191.4	-35.5
-3.57	-191.4	-35.5
-3.57	-191.4	-35.5
-3.57	-191.4	-35.5
-3.57	-191.4	-35.5
-3.57	-191.4	-282.1
-3.57	-191.4	-282.1
-3.57	-191.4	-282.1
-3.57	-191.4	-282.1
-3.57	-191.4	-282.1
-3.57	-474	-282.1
-3.57	-474	-282.1
-3.57	-474	-282.1
-3.57	-474	-282.1
-3.57	-474	-282.1
-3.57	-474	-282.1
-3.57	-838.7	-15.5
-3.57	-838.7	-15.5
-3.57	-182.3	-15.5
-3.57	-182.3	-15.5
-3.57	-212.7	-15.5
-153.15	-212.7	-15.5
-692.81	-159.5	-15.5
-692.81	-159.5	-15.5
-32.93	-139.2	-15.5
-32.93	-139.2	-287.2
-32.93	-139.2	-287.2
-32.93	-107.6	-287.2
-32.93	-107.6	-287.2
-32.93	-107.6	-287.2
-32.93	-107.6	-191.4
-32.93	-107.6	-191.4
-32.93	-107.6	-117.8
-236.34	-107.6	-117.8
-236.34	-107.6	-117.8
-236.34	-107.6	-117.8
-236.34	-107.6	-47.3
-236.34	-107.6	-47.3
-236.34	-107.6	-47.3
-236.34	-107.6	-47.3
-236.34	-107.6	-47.3
-315.3	-107.6	-47.3
-315.3	-107.6	-47.3
-315.3	-107.6	-47.3
-315.3	-107.6	-273.5
-315.3	-107.6	-273.5
-139.22	-107.6	-273.5
-139.22	-107.6	-273.5
-139.22	-107.6	-346.4
-145.85	-107.6	-346.4
-145.85	-107.6	-346.4
-1020.98	-158	-346.4
-182.32	-158	-670
-182.32	-158	-670
-182.32	-158	-670
-182.32	-158	-670
-15.76	-158	-670
-15.76	-113.4	-45.4
-15.76	-113.4	-45.4
-15.76	-113.4	-45.4
-15.76	-87.2	-45.4
-15.76	-87.2	-45.4
-15.76	-87.2	-45.4
-15.76	-87.2	-45.4
-15.76	-87.2	-45.4
-15.76	-87.2	-45.4
-15.76	-87.2	-45.4
-15.76	-87.2	-45.4
-15.76	-87.2	-45.4
-15.76	-87.2	-45.4
-15.76	-87.2	-159.5
-15.76	-87.2	-159.5
-15.76	-28.6	-145.9
-15.76	-28.6	-145.9
-15.76	-28.6	-22.2
-15.76	-28.6	-22.2
-15.76	-28.6	-22.2
-15.76	-28.6	-22.2
-15.76	-28.6	-22.2
-371.27	-28.6	-22.2
-371.27	-28.6	-22.2
-371.27	-28.6	-133.2
-343.6	-28.6	-133.2
-343.6	-28.6	-133.2
-343.6	-28.6	-133.2
-343.6	-28.6	-133.2
-343.6	-28.6	-133.2
-343.6	-28.6	-133.2
-343.6	-28.6	-152.3
-510.49	-28.6	-152.3
-510.49	-28.6	-152.3
-178.67	-28.6	-152.3
-178.67	-28.6	-152.3
-178.67	-28.6	-152.3
-102.1	-28.6	-152.3
-102.1	-28.6	-152.3
-102.1	-28.6	-152.3
-102.1	-28.6	-152.3
-102.1	-28.6	-152.3
-102.1	-28.6	-152.3
-102.1	-28.6	-152.3
-102.1	-28.6	-152.3
-102.1	-28.6	-152.3
-85.08	-28.6	-152.3
-85.08	-28.6	-274.9
-85.08	-28.6	-274.9
-85.08	-28.6	-274.9
-85.08	-28.6	-274.9
-85.08	-28.6	-176.7
-85.08	-28.6	-176.7
-85.08	-28.6	-176.7
-85.08	-28.6	-176.7
-29.55	-28.6	-176.7
-29.55	-28.6	-176.7
-29.55	-28.6	-176.7
-29.55	-28.6	-132.3
-29.55	-28.6	-132.3
-29.55	-28.6	-132.3
-29.55	-28.6	-132.3
-29.55	-28.6	-132.3
-29.55	-28.6	-132.3
-29.55	-28.6	-132.3
-29.55	-28.6	-132.3
-29.55	-28.6	-6.8
-29.55	-28.6	-6.8
-29.55	-28.6	-6.8
-29.55	-28.6	-6.8
-29.55	-28.6	-6.8
-29.55	-246.7	-6.8
-29.55	-246.7	-6.8
-29.55	-246.7	-6.8
-29.55	-246.7	-6.8
-29.55	-246.7	-6.8
-29.55	-246.7	-6.8
-29.55	-246.7	-6.8
-29.55	-246.7	-6.8
-29.55	-246.7	-6.8
-29.55	-376.8	-6.8
-29.55	-376.8	-6.8
-170.16	-376.8	-6.8
-170.16	-376.8	-6.8
-170.16	-376.8	-6.8
-95.72	-376.8	-6.8
-95.72	-189.4	-6.8
-95.72	-189.4	-18.7
-95.72	-189.4	-18.7
-95.72	-189.4	-18.7
-95.72	-189.4	-18.7
-95.72	-189.4	-18.7
-95.72	-189.4	-18.7
-95.72	-189.4	-18.7
-95.72	-189.4	-18.7
-95.72	-139.2	-18.7
-95.72	-139.2	-18.7
-95.72	-139.2	-18.7
-95.72	-340.3	-18.7
-27.35	-340.3	-18.7
-27.35	-34.8	-18.7
-27.35	-34.8	-18.7
-27.35	-34.8	-18.7
-27.35	-34.8	-18.7
-27.35	-34.8	-18.7
-27.35	-34.8	-18.7
-27.35	-191.4	-18.7
-27.35	-191.4	-18.7
-27.35	-191.4	-18.7
-27.35	-63.8	-18.7
-27.35	-63.8	-6.9
-27.35	-63.8	-6.9
-27.35	-402.7	-6.9
-27.35	-402.7	-6.9
-27.35	-402.7	-6.9
-141.8	-402.7	-6.9
-141.8	-402.7	-6.9
-141.8	-402.7	-6.9
-170.16	-402.7	-6.9
-638.11	-402.7	-6.9
-638.11	-402.7	-6.9
-638.11	-402.7	-6.9
-638.11	-402.7	-6.9
-638.11	-402.7	-6.9
-638.11	-402.7	-6.9
-11.78	-297.8	-6.9
-11.78	-297.8	-6.9
-11.78	-297.8	-6.9
-11.78	-95.7	-6.9
-11.78	-95.7	-6.9
-11.78	-518.2	-6.9
-11.78	-518.2	-6.9
-11.78	-518.2	-6.9
-11.78	-518.2	-6.9
-11.78	-518.2	-6.9
-11.78	-518.2	-6.9
-11.78	-518.2	-6.9
-11.78	-518.2	-6.9
-11.78	-518.2	-6.9
-11.78	-301.7	-6.9
-11.78	-301.7	-6.9
-11.78	-301.7	-6.9
-11.78	-489.2	-6.9
-11.78	-489.2	-6.9
-11.78	-489.2	-6.9
-11.78	-56.7	-6.9
-11.78	-56.7	-6.9
-11.78	-56.7	-6.9
-11.78	-255.2	-6.9
-11.78	-255.2	-6.9
-11.78	-255.2	-6.9
-11.78	-382.9	-6.9
-11.78	-66.6	-6.9
-11.78	-66.6	-52.4
-11.78	-66.6	-52.4
-11.78	-66.6	-52.4
-11.78	-66.6	-52.4
-11.78	-66.6	-52.4
-11.78	-66.6	-52.4
-11.78	-272.3	-52.4
-11.78	-272.3	-52.4
-11.78	-272.3	-52.4
-127.62	-272.3	-52.4
-127.62	-15.6	-52.4
-127.62	-15.6	-95.7
-331.82	-15.6	-95.7
-331.82	-15.6	-95.7
-331.82	-15.6	-95.7
-510.49	-15.6	-95.7
-510.49	-15.6	-95.7
-510.49	-15.6	-95.7
-510.49	-15.6	-255.2
-510.49	-15.6	-255.2
-510.49	-15.6	-255.2
-6.38	-15.6	-255.2
-6.38	-15.6	-4.8
-6.38	-15.6	-4.8
-6.38	-15.6	-4.8
-6.38	-15.6	-4.8
-6.38	-15.6	-4.8
-6.38	-15.6	-4.8
-6.38	-15.6	-4.8
-6.38	-15.6	-4.8
-6.38	-15.6	-4.8
-6.38	-15.6	-4.8
-6.38	-15.6	-4.8
-6.38	-333.8	-4.8
-6.38	-333.8	-4.8
-6.38	-333.8	-4.8
-6.38	-333.8	-4.8
-6.38	-51	-4.8
-6.38	-51	-4.8
-6.38	-51	-4.8
-6.38	-58	-4.8
-6.38	-58	-4.8
-6.38	-58	-4.8
-6.38	-58	-4.8
-204.2	-58	-4.8
-6.9	-58	-4.8
-6.9	-5.8	-4.8
-6.9	-5.8	-4.8
-6.9	-5.8	-4.8
-6.9	-5.8	-4.8
-6.9	-5.8	-4.8
-6.9	-5.8	-4.8
-6.9	-5.8	-4.8
-6.9	-5.8	-4.8
-6.9	-5.8	-4.8
-6.9	-5.8	-4.8
-6.9	-5.8	-4.8
-6.9	-5.8	-4.8
-6.9	-5.8	-4.8
-6.9	-5.8	-4.8
-6.9	-5.8	-4.8
-6.9	-5.8	-4.8
-6.9	-5.8	-4.8
-6.9	-5.8	-4.8
-6.9	-5.8	-4.8
-6.9	-5.8	-4.8
-196.34	-5.8	-4.8
-196.34	-5.8	-4.8
-196.34	-5.8	-4.8
-196.34	-5.8	-4.8
-29.17	-5.8	-4.8
-29.17	-5.8	-4.8
-29.17	-5.8	-4.8
-29.17	-5.8	-4.8
-29.17	-5.8	-4.8
-29.17	-5.8	-4.8
-29.17	-5.8	-4.8
-29.17	-5.8	-4.8
-29.17	-5.8	-4.8
-29.17	-5.8	-4.8
-29.17	-5.8	-4.8
-29.17	-5.8	-4.8
-29.17	-5.8	-4.8
-29.17	-127.6	-81.7
-29.17	-127.6	-81.7
-29.17	-127.6	-81.7
-29.17	-127.6	-81.7
-29.17	-401.1	-81.7
-29.17	-401.1	-81.7
-29.17	-401.1	-81.7
-144.14	-401.1	-794.1
-144.14	-401.1	-794.1
-144.14	-401.1	-794.1
-144.14	-401.1	-794.1
-144.14	-401.1	-794.1
-144.14	-401.1	-85.1
-144.14	-401.1	-85.1
-144.14	-401.1	-85.1
-144.14	-401.1	-168.1
-144.14	-401.1	-168.1
-144.14	-401.1	-168.1
-144.14	-218.8	-168.1
-144.14	-218.8	-168.1
-144.14	-218.8	-168.1
-144.14	-218.8	-168.1
-144.14	-218.8	-168.1
-144.14	-218.8	-168.1
-144.14	-16.2	-168.1
-144.14	-16.2	-168.1
-144.14	-16.2	-168.1
-144.14	-16.2	-20.7
-144.14	-16.2	-20.7
-144.14	-16.2	-20.7
-144.14	-16.2	-20.7
-306.29	-16.2	-20.7
-589.03	-16.2	-20.7
-589.03	-16.2	-20.7
-589.03	-16.2	-20.7
-589.03	-16.2	-20.7
-297.79	-16.2	-20.7
-297.79	-16.2	-20.7
-297.79	-16.2	-170.2
-185.63	-16.2	-170.2
-185.63	-16.2	-297.8
-185.63	-16.2	-297.8
-4.82	-16.2	-102.1
-4.82	-16.2	-561.5
-4.82	-16.2	-340.3
-4.82	-16.2	-340.3
-4.82	-16.2	-340.3
-4.82	-148.9	-340.3
-4.82	-148.9	-340.3
-4.82	-148.9	-340.3
-4.82	-820.4	-340.3
-4.82	-820.4	-34.8
-4.82	-820.4	-34.8
-4.82	-820.4	-34.8
-4.82	-299.6	-34.8
-4.82	-299.6	-34.8
-4.82	-299.6	-34.8
-4.82	-299.6	-198.5
-4.82	-299.6	-198.5
-4.82	-299.6	-198.5
-4.82	-299.6	-198.5
-4.82	-15.5	-198.5
-4.82	-15.5	-105.6
-4.82	-15.5	-105.6
-4.82	-15.5	-105.6
-4.82	-15.5	-105.6
-4.82	-15.5	-105.6
-4.82	-15.5	-105.6
-4.82	-15.5	-105.6
-4.82	-15.5	-105.6
-4.82	-368.7	-105.6
-4.82	-368.7	-105.6
-127.62	-368.7	-105.6
-127.62	-368.7	-105.6
-85.08	-368.7	-105.6
-85.08	-368.7	-105.6
-48.62	-368.7	-105.6
-48.62	-368.7	-105.6
-48.62	-31.9	-105.6
-48.62	-31.9	-92.3
-48.62	-31.9	-92.3
-48.62	-31.9	-92.3
-53.18	-31.9	-92.3
-53.18	-31.9	-92.3
-53.18	-31.9	-92.3
-53.18	-170.2	-92.3
-53.18	-170.2	-92.3
-53.18	-170.2	-92.3
-53.18	-170.2	-92.3
-85.08	-170.2	-92.3
-85.08	-647.9	-92.3
-85.08	-647.9	-92.3
-85.08	-647.9	-85.1
-45.04	-647.9	-85.1
-45.04	-558.3	-85.1
-45.04	-558.3	-85.1
-45.04	-558.3	-85.1
-45.04	-558.3	-85.1
-14.5	-558.3	-85.1
-14.5	-765.7	-85.1
-14.5	-765.7	-85.1
-14.5	-765.7	-199.2
-14.5	-765.7	-199.2
-14.5	-765.7	-199.2
-14.5	-765.7	-199.2
-14.5	-654.1	-199.2
-14.5	-654.1	-199.2
-14.5	-654.1	-199.2
-14.5	-654.1	-199.2
-14.5	-654.1	-199.2
-14.5	-82.2	-199.2
-14.5	-82.2	-199.2
-14.5	-82.2	-199.2
-14.5	-82.2	-652.3
-14.5	-82.2	-652.3
-14.5	-82.2	-652.3
-14.5	-82.2	-140.8
-14.5	-82.2	-140.8
-14.5	-82.2	-140.8
-14.5	-82.2	-140.8
-14.5	-82.2	-140.8
-14.5	-82.2	-140.8
-14.5	-82.2	-140.8
-7.85	-82.2	-140.8
-7.85	-82.2	-140.8
-7.85	-82.2	-140.8
-7.85	-82.2	-140.8
-7.85	-714.7	-140.8
-7.85	-42.5	-140.8
-7.85	-42.5	-140.8
-7.85	-42.5	-140.8
-7.85	-42.5	-140.8
-7.85	-42.5	-140.8
-7.85	-875.1	-29.3
-7.85	-875.1	-29.3
-7.85	-437.6	-29.3
-7.85	-437.6	-29.3
-7.85	-177.3	-29.3
-7.85	-177.3	-29.3
-7.85	-177.3	-29.3
-7.85	-177.3	-29.3
-7.85	-177.3	-29.3
-984.52	-177.3	-29.3
-984.52	-177.3	-29.3
-425.41	-177.3	-29.3
-425.41	-177.3	-29.3
-484.97	-177.3	-29.3
-484.97	-113.4	-29.3
-484.97	-113.4	-29.3
-484.97	-113.4	-29.3
-484.97	-113.4	-10.9
-484.97	-113.4	-10.9
19.63	-113.4	-10.9
19.63	-113.4	-10.9
19.63	-113.4	-10.9
19.63	-91.9	-10.9
19.63	-91.9	-10.9
19.63	-91.9	-10.9
19.63	-91.9	-10.9
435.42	-91.9	-10.9
435.42	-91.9	-10.9
435.42	-91.9	-10.9
435.42	-85.1	-10.9
435.42	-85.1	-102.1
530.12	-85.1	-102.1
530.12	-85.1	-102.1
530.12	-85.1	-15.3
530.12	-85.1	-15.3
204.2	-918.9	-15.3
467.95	-15	-15.3
467.95	-15	-15.3
331.82	-15	-15.3
331.82	-15	-15.3
331.82	-15	-15.3
24.9	-15	-15.3
24.9	-15	-15.3
24.9	-15	-15.3
24.9	-15	-15.3
24.9	-15	-15.3
24.9	-15	-15.3
24.9	-15	-15.3
24.9	-15	-15.3
24.9	-15	-15.3
24.9	-15	-15.3
24.9	-15	-15.3
24.9	-15	-15.3
198.52	-15	-15.3
198.52	-15	-15.3
198.52	-15	-15.3
382.87	-15	-15.3
107.04	-15	-15.3
107.04	-15	-15.3
107.04	-15	-15.3
107.04	-15	-15.3
107.04	-15	-15.3
107.04	-15	-15.3
107.04	-15	-15.3
107.04	-15	-15.3
107.04	-22.1	-15.3
510.49	-22.1	-78
510.49	-22.1	-78
663.64	-22.1	-78
425.41	-22.1	-78
425.41	-22.1	-78
319.06	-22.1	-78
319.06	-22.1	-78
117.81	-22.1	-78
117.81	-22.1	-78
117.81	-22.1	-78
117.81	-22.1	-23.2
494.54	-22.1	-23.2
494.54	-22.1	-23.2
494.54	-22.1	-23.2
494.54	-22.1	-23.2
494.54	-22.1	-23.2
51.05	-22.1	-23.2
51.05	-22.1	-23.2
51.05	-22.1	-23.2
51.05	-22.1	-23.2
51.05	-22.1	-23.2
51.05	-22.1	-23.2
51.05	-22.1	-23.2
51.05	-22.1	-23.2
51.05	-22.1	-23.2
255.24	-22.1	-23.2
53.74	-22.1	-287.2
53.74	-22.1	-287.2
53.74	-22.1	-287.2
53.74	-22.1	-287.2
53.74	-22.1	-287.2
116.02	-22.1	-223.3
116.02	-22.1	-223.3
116.02	-22.1	-223.3
26.87	-22.1	-223.3
26.87	-22.1	-223.3
26.87	-22.1	-223.3
26.87	-22.1	-223.3
26.87	-22.1	-223.3
26.87	-22.1	-223.3
26.87	-22.1	-223.3
26.87	-22.1	-223.3
26.87	-22.1	-223.3
26.87	-22.1	-223.3
26.87	-22.1	-223.3
553.03	-96.8	-461.2
553.03	-96.8	-461.2
531.76	-96.8	-461.2
531.76	-96.8	-461.2
531.76	-96.8	-461.2
583.42	-96.8	-461.2
583.42	-96.8	-461.2
8.8	-96.8	-461.2
8.8	-297.8	-461.2
8.8	-297.8	-461.2
8.8	-297.8	-461.2
8.8	-510.5	-461.2
8.8	-978.4	-461.2
8.8	-978.4	-461.2
8.8	-401.1	-461.2
8.8	-401.1	-461.2
8.8	-191.4	-485
8.8	-191.4	-485
8.8	-429.9	-485
8.8	-429.9	-485
8.8	-429.9	-485
8.8	-429.9	-485
8.8	-429.9	-485
8.8	-145.9	-485
159.53	-145.9	-485
159.53	-437.6	-257.7
408.39	-437.6	-257.7
601.65	-319.1	-257.7
601.65	-319.1	-257.7
601.65	-319.1	-257.7
601.65	-255.2	-257.7
510.49	-255.2	-257.7
510.49	-255.2	-257.7
510.49	-255.2	-257.7
413.25	-255.2	-257.7
413.25	-216	-257.7
413.25	-216	-257.7
413.25	-216	-257.7
413.25	-216	-257.7
413.25	-638.1	-257.7
5.94	-467.9	-257.7
[truncated: 1,697 more rows]
