# Supplementary material for: Kinesin-1, -2, and -3 motors use family-specific mechanochemical strategies to effectively compete with dynein during bidirectional transport
Source: eLife. 2022 Sep 20;11:e82228. doi: 10.7554/eLife.82228 (PMC9545524; doi:10.7554/eLife.82228)
Supplement: Figure 6—figure supplement 1—source data 1. [file elife-82228-fig6-figsupp1-data1.xlsx]

## Sheet: Fig. 6B
Slow 1-sec Seg Velocities (no pauses, experiment) (nm/s)				1-sec Seg Velocities (simulation, 5/s Kin reattach) (nm/s)				1-sec Seg Velocities (simulation) (nm/s)				1-sec Seg Velocities (simulation, best-fit) (nm/s)
DDB-Kin1	DDB-Kin2	DDB-Kin3		DDB-Kin1	DDB-Kin2	DDB-Kin3		DDB-Kin1 (4.41/s)	DDB-Kin2 (16.1/s)	DDB-Kin3 (70/s)		DDB-Kin1	DDB-Kin2	DDB-Kin3
-311.97	-319.1	-102.1		-178.717	-177.919	-82.79		-176.669	-92.5552	-21.2031		9.6623	-34.5165	-6.20412
-311.97	-75.1	-102.1		-374.493	-98.6189	-150.792		-244.548	-12.5669	-146.284		7.63925	-61.6016	-45.3338
-311.97	-75.1	-102.1		-49.1271	-311.844	-201.786		125.877	-74.8999	-41.0532		-12.0708	-44.079	-27.2455
-304.33	-75.1	-28.4		13.1782	-180.495	-203.38		-102.212	-99.0442	-25.5932		-0.3238	-52.7728	-2.08403
-304.33	-75.1	-28.4		-256.615	-162.5	-236.782		-226.604	21.3446	-47.1856		82.1238	8.51396	601.638
-304.33	-75.1	-28.4		34.838	-229.799	-255.31		-166.517	-70.1467	-3.22884		-13.2436	11.2665	-76.957
-304.33	-569.4	-28.4		-87.8163	28.0851	-167.049		-59.9671	-77.2974	24.7318		-24.1486	6.4909	-9.86631
-304.33	-569.4	-28.4		-338.183	8.6893	-240.074		-49.9532	19.7112	24.5493		35.2702	-14.3804	-47.3261
-304.33	-569.4	-28.4		-50.0099	-141.036	-252.575		-45.0976	-258.542	-28.7318		8.7314	-30.5375	-46.5068
-304.33	-569.4	-28.4		14.9143	-162.668	-337.461		-156.971	-32.8511	-46.2593		-35.8056	-124.894	-10.0885
-304.33	-600.3	-28.4		-51.9928	-274.181	-328.495		-52.4372	-168.564	-145.327		-21.379	-11.9888	-45.7115
-304.33	-600.3	-106.4		-188.042	-303.908	-129.493		-121.251	-13.915	-9.59218		18.0666	-25.0076	13.2742
-304.33	-600.3	-106.4		13.2208	-155.428	-358.056		-104.609	-68.5652	-50.5291		-15.1972	-24.5278	131.695
-304.33	-600.3	-106.4		30.0016	-145.452	-166.557		31.0385	37.1817	27.0465		113.755	-62.3624	-45.6857
-304.33	-600.3	-255.2		15.0711	-126.286	-216.14		35.5018	-0.767782	-53.8141		37.7202	-39.4864	12.3047
-304.33	-600.3	-306.3		-22.6505	-48.851	-162.814		-171.303	-127.095	-44.3592		2.04108	-53.9726	287.96
-304.33	-600.3	-18.5		-41.7818	-158.074	-13.8248		-195.117	-108.024	-25.6231		69.8857	23.5295	-36.1926
-304.33	-600.3	-18.5		-139.166	-214.156	-188.191		-249.005	-94.2692	-88.9915		-24.0505	-61.5571	-63.4921
-306.29	-600.3	-18.5		-7.3867	-227.961	-178.618		-1.13292	27.5239	-4.52196		-47.8609	24.4617	-19.2417
-191.43	-600.3	-18.5		-12.2121	-86.6197	-49.8791		-129.698	-79.0837	-76.1042		-41.611	-13.7411	397.538
-893.36	-600.3	-18.5		-45.2065	-146.796	-409.013		-11.7661	-115.873	-97.2258		12.7688	-15.668	298.01
-21.12	-600.3	-18.5		-71.3848	-311.366	138.917		-159.261	-184.301	267.9		73.0708	-15.2558	5.30831
-21.12	-600.3	-18.5		-68.5543	-159.93	-279.611		-161.211	-83.5247	11.7477		68.387	-75.3877	6.0235
-21.12	-600.3	-18.5		-41.5105	-304.285	-131.385		-254.123	-85.2262	-89.8999		69.2167	-18.6506	-48.2365
-21.12	-600.3	-18.5		-46.9474	38.0269	-194.773		-171.359	-186.593	0.608446		29.352	-72.9927	-17.3975
-21.12	-121.8	-18.5		-140.345	-81.1723	-324.961		-131.653	-178.694	-0.490648		-10.8558	-47.4752	-31.2693
-21.12	-121.8	-18.5		93.3235	-163.709	-194.371		-44.2754	20.7033	-111.742		43.1123	35.2536	-2.63597
-21.12	-121.8	-18.5		-167.063	-10.603	-216.993		-168.244	-50.8741	341.414		9.6156	-3.73465	-34.3619
-21.12	-121.8	-18.5		-166.872	0.749926	-31.3841		-150.584	-172.682	-1.20115		-17.0109	-28.0977	93.1713
-21.12	-121.8	-18.5		-247.497	-166.797	-228.307		-83.2216	-172.192	196.674		81.1947	-56.419	-27.7777
-21.12	-121.8	-18.5		-72.5769	23.4907	-307.911		-196.179	-61.3099	-49.4017		-22.5642	-87.6893	-35.3151
-21.12	-121.8	-18.5		-310.211	-129.77	-194.593		79.7945	-229.133	-142.103		-3.98588	-60.9199	-80.8875
-21.12	-121.8	-18.5		-115.476	-268.447	-223.453		-76.4288	99.5148	-98.6626		19.5528	13.7773	-89.3477
-21.12	-121.8	-18.5		-196.965	-154.612	-159.501		-86.1987	-81.1121	16.5026		-5.22104	22.0521	-60.1778
-21.12	-121.8	-18.5		-19.5128	38.3447	-111.381		-61.099	-53.5668	-64.3992		27.3438	29.771	-14.8999
-21.12	-121.8	-18.5		-9.41519	-81.2138	-96.7751		-70.8193	-12.5139	-143.158		30.9366	-68.6667	193.3
-21.12	-121.8	-34.5		-101.76	-99.7621	-266.799		-225.74	-27.1542	-68.0907		151.346	-10.8585	-15.6463
-21.12	-121.8	-34.5		-202.44	-273.879	-216.201		32.4819	-114.077	-24.208		-32.7498	-47.479	-30.9781
-21.12	-36.5	-34.5		3.11675	-3.12824	-255.649		-147.527	38.2796	11.3593		42.4304	-104.174	-25.342
-21.12	-36.5	-34.5		-52.9545	-300.954	10.5589		-129.165	-108.02	-102.399		3.78546	-72.21	-8.32623
-21.12	-36.5	-34.5		-37.115	-208.085	-29.3291		-229.018	1.95812	-55.9743		62.2414	-82.5864	-45.4384
-21.12	-36.5	-34.5		-117.868	-146.555	-363.524		251.875	-201.042	66.9851		24.7747	51.0982	-32.5417
-21.12	-36.5	-34.5		54.4002	-53.3061	-239.383		51.538	-55.7079	-24.525		0.326514	-48.4063	-71.1569
-21.12	-36.5	-34.5		-74.3821	-161.347	-227.666		54.2193	-78.0679	-120.497		-15.6509	-41.9563	-35.776
-21.12	-88.8	-34.5		42.3523	-48.4334	-174.125		-50.2551	-53.7409	-19.1449		-3.09698	-34.036	-40.5174
-21.12	-88.8	-34.5		-159.261	-189.412	-368.242		-67.1276	-19.7566	-10.7761		33.9117	-32.0987	-39.1107
-21.12	-88.8	-34.5		24.6028	-230.597	-337.734		-274.744	-43.0321	-81.253		-2.33586	16.0394	18.7707
-21.12	-88.8	-69.2		4.6476	-47.3098	-140.278		-107.244	-85.0238	-32.3098		-103.432	-39.2991	-7.8883
-21.12	-88.8	-69.2		-99.1045	-141.714	90.7436		0.554287	-195.278	-108.649		-13.6817	-45.3758	-54.0677
-21.12	-88.8	-69.2		-94.6645	-120.326	-203.184		-21.2763	-54.6097	8.7774		35.8338	-12.155	2.27061
-21.12	-88.8	-69.2		-273.206	-134.533	-143.853		-66.0355	46.741	-47.4608		-13.7999	-24.2131	-55.7058
-21.12	-51	-69.2		-229.338	-41.2779	-191.641		13.6201	-67.8929	-169.649		23.0383	-35.2715	17.1586
-21.12	-51	-69.2		-65.4291	-6.09509	-227.392		75.6029	-74.8713	-24.9531		-47.5137	-39.5294	588.778
-21.12	-51	-69.2		-42.509	-223.661	-202.128		16.3945	-91.9873	-157.348		-23.6503	-38.831	934.61
-21.12	-51	-69.2		-45.5478	-116.284	-128.981		15.4281	-125.241	-76.8024		51.4451	-31.7923	110.437
-21.12	-382.9	-69.2		-23.64	-133.932	-308.654		-72.8627	6.63103	-34.6915		65.8601	7.24547	-49.6589
-21.12	-382.9	-69.2		-168.855	-219.203	-83.9544		-66.051	-114.034	12.9642		112.706	35.0971	-24.1481
-21.12	-467.9	-69.2		73.3636	-221.165	-209.409		-3.27704	-29.6195	-39.3404		28.1892	-40.475	30.7311
-21.12	-467.9	-69.2		45.7594	-257.344	-145.192		-364.885	-47.9595	-101.647		78.7372	1.48034	2.06914
-21.12	-595.6	-69.2		-202.802	-109.414	-152.383		-14.2355	-27.9726	0.340962		61.2299	-19.2524	-135.616
-21.12	-425.4	-69.2		-217.948	-74.0438	-180.372		58.3257	-143.695	-37.9039		14.3169	-12.9748	-51.1538
-21.12	-212.7	-69.2		-35.9062	-154.572	-72.3636		-115.185	12.5214	-68.7797		-10.5121	-62.2337	-2.48343
-21.12	-212.7	-69.2		-142.442	-197.123	-220.369		-25.7247	-103.014	-90.3819		12.2974	-46.8032	-23.4129
-425.41	-255.2	-69.2		-80.7631	-240.084	-96.9478		-106.745	47.9011	7.40652		18.5319	28.5878	-0.752829
-19.63	-255.2	-465.4		-51.4389	-56.0545	-279.827		-170.997	-8.74371	-123.375		-60.0585	-80.1274	-63.6207
-19.63	-255.2	-465.4		-105.953	-37.9838	-233.394		-241.601	-92.8805	-15.6208		43.2285	-37.2797	-15.1611
-19.63	-255.2	-465.4		-176.729	-150.74	-171.53		-1.97867	-83.9653	-93.8794		-25.5112	-31.7557	8.04395
-19.63	-638.1	-465.4		42.8312	-120.854	-99.2649		-41.4471	-19.4039	24.1072		0.252344	-92.4329	-16.8415
-19.63	-280.8	-465.4		-30.966	-62.4004	-251.752		206.864	27.6567	488.375		-4.46978	-4.52114	-8.99729
-19.63	-280.8	-255.2		24.404	-152.419	-183.127		63.9122	26.26	-103.016		-16.7866	2.18671	-35.7698
-19.63	-280.8	-255.2		56.9406	-168.17	-139.363		32.8831	1.28361	-87.1837		9.15225	-6.10613	-84.7708
-19.63	-56.7	-340.3		-206.062	-204.911	-175.077		-25.7016	-166.224	-35.8596		66.3575	-72.029	-69.1302
-19.63	-56.7	-119.6		-45.8195	-129.198	-122.799		-157.97	-81.6393	-126.775		-63.2399	3.59151	-53.2602
-19.63	-56.7	-119.6		37.9458	-109.575	-104.611		1.35938	-193.406	74.4511		-101.778	-36.8572	-6.50815
-19.63	-56.7	-119.6		27.7896	-14.8097	233.551		-246.33	-70.3995	-125.576		-8.23486	57.573	-5.14414
-116.02	-56.7	-119.6		-44.5002	-124.587	-128.683		-7.78485	21.5957	34.3621		-10.9045	8.56511	765.416
-116.02	-56.7	-119.6		41.5365	-106.796	-242.128		-103.412	-3.29142	32.2182		36.0366	-53.321	872.36
-116.02	-56.7	-119.6		-169.821	-33.5209	-127.335		166.03	-226.196	-45.0938		6.58955	-0.225988	-13.4193
-170.16	-56.7	-119.6		-54.7797	-132.232	-259.074		-40.5177	-27.6549	-6.12911		30.1709	-60.424	90.4618
-201.51	-56.7	-119.6		-234.436	-75.1192	-205.342		-160.641	-70.3404	23.7443		-89.062	-53.2408	-91.5503
-201.51	-56.7	-119.6		-164.476	-359.597	-199.494		18.3302	-246.391	10.7213		16.1041	-39.6465	-22.1838
-201.51	-120.1	-56		-2.36296	-132.249	-235.332		23.2181	-173.179	-142.323		25.8514	-68.7486	-33.4835
-201.51	-120.1	-56		-58.3773	-220.283	-168.445		-4.18788	-134.767	-7.03341		-15.3492	-45.2707	-20.4424
-201.51	-120.1	-56		-17.7191	-230.354	-176.098		-49.4753	-267.362	-88.7542		-29.1692	47.7932	-58.2258
-364.64	-120.1	-56		3.24958	-27.236	-300.519		-120.384	-91.4577	-57.1905		-33.5174	110.031	-42.8365
-364.64	-120.1	-56		-10.8385	8.02938	-34.3794		-344.2	-16.7259	-29.3171		51.5874	-66.7347	11.3896
-1123.08	-182.3	-56		-78.7226	-76.4478	-410.394		-254.735	-82.3676	-71.839		-11.7404	-10.938	-79.3545
-453.77	-182.3	-56		-11.6025	-55.4616	-234.054		3.95906	-139.404	-78.6962		25.7608	-59.7119	-62.7643
-453.77	-131.7	-56		-168.472	-301.483	-237.738		-374.725	-0.60865	-65.8196		-14.4381	-77.1507	-14.6213
-453.77	-131.7	-56		-196.371	-121.012	-244.8		-377.616	-60.5869	-95.4432		-40.8186	-27.6326	-86.4766
-32.49	-131.7	-56		-114.777	-278.369	-185.146		-303.443	-83.8522	-111.304		-19.0614	-31.7742	28.2807
-32.49	-131.7	-56		19.7385	-215.962	-72.9874		-20.3841	-53.547	-27.8467		-38.3941	-15.9143	-9.73547
-32.49	-131.7	-56		67.859	-213.064	-258.072		-104.171	-36.2758	-14.9107		191.029	-23.6271	124.983
-32.49	-131.7	-204.2		-12.3132	-145.902	-216.837		-76.2596	-166.324	-31.4357		-11.8492	-68.7337	-101.213
-32.49	-131.7	-127.6		-133.405	-137.912	-182.52		-55.9111	-49.5283	-62.4036		-11.063	48.3181	22.936
-32.49	-131.7	-127.6		-362.393	-74.6778	-201.174		-158.943	-68.2544	-48.2395		43.0436	-8.53862	51.234
-32.49	-131.7	-127.6		-46.4702	-194.238	-180.765		-123.867	-74.6542	-18.3201		-26.7413	-30.7279	-35.5899
-32.49	-113.4	-127.6		-142.663	-246.798	-200.657		-128.619	203.61	-1.11391		9.66201	-39.0996	-3.5074
-32.49	-113.4	-127.6		-50.9618	-101.148	-75.7179		25.1659	-15.6584	-31.7515		23.099	-54.7465	-60.029
-32.49	-113.4	-127.6		-283.095	-77.4921	-79.9438		52.4975	-47.5146	-36.8128		-120.677	-30.4914	8.07428
-32.49	-102.1	-127.6		-197.659	-253.346	-126.95		-165.865	-270.657	-128.838		27.8096	-4.91223	-77.2581
-32.49	-208.8	-127.6		-131.706	-278.832	-174.059		-79.1123	-4.85371	-7.04095		-43.877	-78.8573	-50.7921
-32.49	-208.8	-127.6		-243.064	-356.14	-184.206		-116.122	-43.1957	-59.3416		33.221	-72.0546	9.44619
-32.49	-208.8	-139.2		-218.835	-163.303	-257.872		-103.138	-125.463	-131.898		-15.1158	-48.3693	-69.1196
-32.49	-170.2	-139.2		-284.079	-75.0305	-353.376		-408.657	-142.981	-31.8015		98.6947	-88.2339	-50.1657
-32.49	-11.7	-139.2		-136.012	-185.725	-149.511		-39.4095	-113.611	-68.5579		-8.25615	-25.5789	-80.9503
-474.03	-11.7	-109.4		-128.85	-368.755	-204.315		-28.1041	-276.906	-116.533		34.6675	-81.0512	45.639
-474.03	-11.7	-109.4		-16.3117	-149.104	-242.981		-38.5109	-85.2024	-29.3401		-14.1127	-77.3962	-4.84655
-283.61	-11.7	-109.4		57.369	-211.21	-323.644		-77.5473	-60.7274	-67.6909		-32.2049	-34.9298	-69.5323
-283.61	-11.7	-109.4		-41.9353	-60.3438	-340.892		-60.953	-231.348	3.25767		-1.77746	-38.8362	14.3002
-283.61	-11.7	-109.4		-43.8692	-292.768	-208.371		-58.2453	-142.907	121.505		99.6772	136.637	-71.286
-204.2	-11.7	-109.4		-201.094	-178.036	-248.97		-52.495	-76.5192	535.397		-4.44745	102.429	-7.99949
-204.2	-11.7	-124.2		-52.1054	15.0915	-151.088		-66.4359	-71.619	-62.4141		4.02187	-8.35105	22.8224
-204.2	-11.7	-124.2		-83.6584	-8.77502	-123.905		99.5815	-83.179	-188.298		24.823	-41.2621	-55.5951
-204.2	-11.7	-124.2		-448.937	-206.573	-133.235		104.69	-13.9054	-20.4122		37.9189	-78.2325	-23.1268
-204.2	-11.7	-124.2		-281.143	-156.91	-380.116		44.4489	-156.035	-71.462		-16.534	-94.3709	-55.0043
-204.2	-11.7	-124.2		-92.5582	-94.056	-132.3		-279.058	-149.271	17.6838		-13.8201	15.55	-39.2762
-297.79	-11.7	-124.2		-237.667	-215.254	-317.547		-154.105	-160.877	-34.235		-18.7959	-19.3466	-56.5617
-297.79	-11.7	-124.2		-108.378	-302.293	-173.475		-161.872	45.2558	-24.2783		34.2757	-30.5507	-88.1818
-425.41	-11.7	-124.2		-107.154	-93.6778	-315.13		-127.018	-57.4405	-59.5403		-4.78789	21.2754	-47.2157
-255.24	-11.7	-124.2		-10.175	-252.758	-216.106		-123.717	-58.2973	-69.3504		26.157	-82.9613	-82.0293
-255.24	-11.7	-124.2		-145.326	-143.313	-271.668		-143.419	5.3319	2.2797		-23.327	-2.41028	-41.3194
-255.24	-11.7	-124.2		111.442	-79.149	-149.233		-106.173	-136.265	-1.97391		-16.0348	-15.8102	-65.5259
-255.24	-11.7	-283.6		-5.2427	-175.58	-288.424		-236.264	-209.898	-6.32065		55.646	-84.4205	-36.4968
-255.24	-11.7	-283.6		-130.1	-19.2263	-95.1682		15.0938	-30.7966	-26.2651		39.6161	-12.6802	-40.0561
-57.43	-11.7	-283.6		-173.621	-257.612	-216.24		10.4877	-47.0857	-26.5149		-1.06597	-82.4254	0.856699
-57.43	-11.7	-68.7		-149.223	-248.653	-67.3326		23.4915	-12.7851	-52.6248		69.6312	-31.6369	6.31553
-57.43	-11.7	-68.7		-11.0617	-101.833	-109.107		-201.544	-201.468	-117.385		-35.8283	-10.8139	-5.48008
-57.43	-11.7	-68.7		-6.09531	-14.876	-259.064		-56.3431	-98.1859	-63.7856		58.689	-16.3957	-53.989
-57.43	-11.7	-68.7		-131.526	-45.1213	-155.4		15.5887	-194.736	263.022		-24.0988	9.26729	-34.0016
-57.43	-11.7	-68.7		-18.3437	-19.8946	-216.299		-9.44655	-133.166	-67.0789		15.1297	-38.8283	-49.3137
-57.43	-11.7	-68.7		-208.817	-34.8748	-267.815		22.6925	-204.349	-31.3243		-22.3706	20.6746	168.28
-57.43	-11.7	-68.7		47.3734	-195.875	-227.35		-88.9552	-175.626	-32.8457		-2.08229	-79.2237	14.3864
-57.43	-11.7	-280.8		58.6871	-185.136	-291.712		-179.527	-8.54722	-62.8046		-54.5683	-53.8064	-29.6302
-57.43	-11.7	-280.8		76.7559	-109.472	-220.761		-53.0254	-68.1805	-96.4475		32.2307	-115.436	-65.0875
-57.43	-11.7	-280.8		-141.295	-179.956	-28.744		-83.9175	-34.9611	-119.648		12.6559	-96.8719	-35.1459
-142.94	-229.7	-42.5		-462.047	-211.065	-380.374		-0.400651	-198.664	-52.8589		27.7397	-40.7335	75.0129
-142.94	-229.7	-42.5		-319.702	-7.82815	-221.348		-343.136	-46.4054	20.2403		38.1999	18.758	118.604
-142.94	-229.7	-42.5		-5.39686	-119.054	-108.978		-76.6742	-119.483	136.234		-29.6426	14.691	31.7215
-142.94	-127.6	-364.6		-192.626	-120.943	-132.509		133.15	-52.7269	-93.6228		132.15	-49.0941	-58.0744
-142.94	-127.6	-364.6		-59.3453	-68.4531	-192.364		70.7125	7.76055	-62.912		-61.8425	-102.334	-83.666
-142.94	-127.6	-31.9		-35.506	-314.18	-273.882		1.96269	27.1707	-102.044		31.367	-50.6104	-58.45
-142.94	-127.6	-31.9		-152.298	-267.317	-267.788		-298.796	-7.16319	-54.5332		27.6458	-40.5793	-56.4053
-382.87	-127.6	-31.9		-212.095	-338.562	457.171		-44.2811	-179.795	-53.6013		33.3818	-64.8114	427.535
-357.34	-30	-31.9		29.9454	-180.926	-333.809		10.5779	-43.1852	-57.6524		54.8799	-5.57031	140.236
-255.24	-30	-31.9		-99.3165	-178.845	-137.92		-142.553	-30.0165	-50.7803		-48.7244	118.946	3.14269
-8.1	-30	-31.9		-129.403	-165.451	-97.9241		52.2924	-151.873	0.264109		-34.6724	5.23791	-50.9182
-8.1	-30	-31.9		-31.116	-76.4898	-238.255		-128.344	-227.168	-59.6289		13.9078	-43.9292	39.0953
-8.1	-30	-31.9		-271.73	-75.8109	-266.846		-130.27	-99.7822	-145.286		-2.62789	-62.6361	7.88575
-8.1	-139.2	-31.9		-107.627	-141.418	-206.217		-297.265	-153.386	-108.958		17.7611	100.109	-6.28774
-8.1	-139.2	-31.9		-186.688	-259.739	-233.228		-25.954	-48.4214	-71.3331		23.4534	-37.3921	0.282571
-8.1	-139.2	-31.9		-77.0184	-257.58	-164.63		-182.286	-157.58	-90.9013		39.5918	-39.7966	-16.0455
-8.1	-139.2	-31.9		-375.192	-87.3594	-187.11		-187.404	-61.671	-31.3874		-46.4646	-134.858	14.8305
-8.1	-139.2	-31.9		-237.236	-89.6772	-183.99		-30.9794	-146.032	-116.733		-0.0843224	-26.6462	522.791
-8.1	-139.2	-31.9		-273.88	-86.4533	-213.035		-98.538	-122.484	0.0298082		-28.1929	-39.3501	5.66199
-8.1	-139.2	-31.9		-177.742	-73.7899	-224.238		-178.409	-177.686	-109.967		-36.5958	-20.9151	-9.28297
-8.1	-139.2	-31.9		-65.1451	-225.507	-186.314		-2.96854	-105.459	-82.3347		-22.7427	-79.2426	-3.40537
-8.1	-139.2	-31.9		-149.972	-223.027	-120.784		46.1359	-33.8293	9.52695		-28.1675	-12.6518	23.8614
-8.1	-139.2	-31.9		-4.90779	-115.75	-224.59		21.3223	-45.3978	-10.7509		15.2486	-85.6288	-50.0956
-8.1	-139.2	-31.9		-164.225	-182.26	-252.866		84.9118	1.7438	-8.41822		40.5801	-66.8337	38.2513
-8.1	-139.2	-31.9		-81.2988	-191.031	-72.0046		-27.8927	-18.2647	-116.772		-40.3164	-9.11828	-33.5991
-8.1	-139.2	-31.9		-170.331	-143.681	-390.799		-9.55731	60.7755	-96.602		24.4074	34.3899	2.64152
-8.1	-139.2	-137.4		-185.477	-350.244	-177.929		-157.29	-104.091	421.961		-34.7578	-56.6341	127.218
-8.1	-139.2	-137.4		-272.802	-100.151	-295.07		86.6508	-110.149	-69.4693		-76.9879	15.1656	-26.5407
-162.43	-139.2	-137.4		-12.2642	-198.861	-347.019		-140.384	17.0302	-82.0333		51.4512	-32.587	-17.1411
-162.43	-139.2	-137.4		-336.786	-74.3893	-304.614		-231.757	-52.5132	-23.2989		24.0199	-27.4471	65.0747
-162.43	-139.2	-137.4		-180.676	-137.587	-230.162		-175.2	-72.8614	0.773866		-19.0601	-82.1319	-49.9669
-319.06	-139.2	-137.4		-132.855	-278.217	-250.73		-168.552	-127.416	-10.0046		-57.0278	-68.1865	18.1148
-311.97	-139.2	-137.4		-144.617	-165.741	-182.4		-176.263	-40.3777	-34.0072		19.1951	-8.6638	24.7638
-311.97	-139.2	-25.5		-170.185	-165.237	-210.656		-258.633	-49.9052	-94.2624		-70.4122	-0.594221	122.429
-311.97	-139.2	-25.5		-405.563	-63.1819	-200.923		-108.871	-148.474	-68.2701		4.00532	-112.909	61.1724
-11.1	-114.9	-25.5		-118.525	-106.723	-282.229		-98.6743	-73.8668	11.8888		-56.3425	-103.268	26.3127
-11.1	-114.9	-25.5		-254.213	-2.56961	-222.261		-29.1286	-7.99211	-123.092		10.907	-23.9098	-94.9057
-11.1	-114.9	-25.5		-79.8712	-28.0438	-146.991		-48.4883	-104.591	122.849		23.4854	12.6818	4.27201
-11.1	-114.9	-25.5		4.335	-159.965	-171.416		-15.1706	-129.285	-33.1665		-37.4674	-16.7411	61.8093
-11.1	-114.9	-25.5		72.4595	-129.344	-179.429		58.2518	-194.538	-1.42988		205.665	-30.5054	0.0454466
-11.1	-114.9	-25.5		-104.997	-102.722	-211.765		-257.235	-88.2453	-65.0733		46.6154	-84.1731	15.1688
-11.1	-18.2	-25.5		-37.0849	-179.544	-379.432		-203.56	-20.6236	-98.8767		-33.0209	0.151215	-0.611425
-11.1	-18.2	-25.5		-47.0831	-234.707	-156.726		-445.779	-185.005	-121.322		68.2821	-33.1231	28.3722
-11.1	-18.2	-25.5		91.1826	-170.655	-19.4626		117.013	-63.4653	-60.8606		449.657	-70.5513	27.3863
-11.1	-18.2	-25.5		45.5316	-140.876	-294.033		-341.479	-112.974	-68.2956		18.9276	-13.9335	-69.1915
-11.1	-18.2	-25.5		29.1314	-68.6454	-129.105		-214.15	36.9519	-64.7957		-23.2948	82.2685	-86.9984
-11.1	-18.2	-25.5		-33.2459	32.7578	-324.596		-383.63	-97.6214	-52.9211		-22.5948	-32.5076	-90.5277
-11.1	-18.2	-25.5		-66.6924	-21.2714	-234.65		-17.8892	-90.8352	-76.1909		42.0453	22.9697	-4.88234
-127.62	-18.2	-25.5		-162.954	-12.2329	-269.026		-353.263	-52.066	-145.001		-4.10355	28.4354	-44.7343
-127.62	-18.2	-25.5		-220.016	-81.4285	-100.446		-159.632	-117.284	-57.0703		-94.2769	2.31636	-6.31588
-127.62	-18.2	-25.5		-183.256	19.8924	-136.76		-121.254	-66.0479	-54.0708		46.0722	-31.4651	-42.319
-127.62	-18.2	-25.5		-118.275	-118.081	-223.252		27.4461	-85.822	-79.8617		-33.5126	47.9383	4.37578
-127.62	-18.2	-25.5		-168.953	-72.8982	-271.895		-71.2645	-22.9693	-70.9044		25.0524	42.4743	-41.4934
-127.62	-46.7	-25.5		-221.433	-264.044	-160.495		-180.074	-20.4067	-136.278		177.962	34.2969	9.65403
-7.98	-46.7	-25.5		12.9554	-117.009	337.951		64.2099	-116.033	-89.6119		-46.1752	6.8726	-32.4536
-7.98	-46.7	-25.5		33.5029	-75.0887	86.3978		-77.7727	-1.22557	-10.8027		37.5964	-71.3794	87.1008
-7.98	-46.7	-170.2		-93.5464	-172.419	-148.868		-369.596	-129.413	-82.776		44.387	114.161	71.178
-7.98	-46.7	-170.2		-92.2767	-56.4173	-111.971		42.1361	-60.9788	-73.5642		23.7114	-37.5743	-46.8814
-7.98	-46.7	-170.2		75.9648	-249.867	-187.867		-259.119	-136.869	-22.2151		-34.986	3.19387	-28.2493
-7.98	-46.7	-255.2		-183.046	-225.257	-52.021		-221.482	-103.287	-83.1033		-18.0632	-8.33869	-11.8454
-7.98	-46.7	-255.2		-111.232	-5.28521	-272.889		45.9883	-114.456	97.6646		-12.5271	-45.4256	-57.3969
-7.98	-46.7	-829.5		-90.5848	-100.689	-287.39		-59.1745	-64.1013	35.5933		2.62731	-41.219	0.782824
-7.98	-46.7	-829.5		-86.2569	-168.609	-161.643		-184.397	-77.4353	42.2771		-24.8103	4.05449	-45.503
-7.98	-46.7	-829.5		-19.7323	-112.433	-171.985		12.7982	-72.5396	-16.6278		-2.49145	31.3444	-42.0488
-7.98	-46.7	-829.5		-208.345	-256.259	-262.203		-202.826	-60.4869	41.3813		-23.2542	-4.5939	-82.7092
-7.98	-46.7	-829.5		14.6799	-210.634	-171.48		-33.1685	-166.05	-85.4466		52.2939	-76.0615	0.070406
-7.98	-46.7	-232		-47.8819	-295.868	-213.229		40.2327	-88.0237	-71.1817		-40.4793	-67.0224	-14.7624
-7.98	-46.7	-232		-229.155	-96.8655	-144.998		-6.46033	36.4287	-52.4943		18.697	53.0546	-92.6239
-7.98	-46.7	-232		103.751	-193.997	-175.371		-249.328	227.283	-4.83741		64.1501	78.3286	-57.4949
-7.98	-46.7	-638.1		219.624	-252.05	-201.233		-203.778	-16.2322	-83.717		-11.9207	-46.2314	53.3779
-7.98	-46.7	-51		45.8535	-397.277	-256.026		-132.921	-18.0848	-46.5613		21.6773	59.3874	-49.0597
-7.98	-46.7	-51		-122.003	-216.013	-242.45		-196.148	21.0033	-85.207		35.5641	0.540474	34.7854
-25.78	-46.7	-51		-124.138	47.8281	-243.066		-70.4914	-67.5965	-67.6283		-12.1572	-5.62955	26.4236
-25.78	-536	-51		22.5001	2.30604	-362.403		-119.68	22.1008	-100.934		65.4752	-81.9317	-32.7517
-25.78	-536	-51		29.6174	-180.18	-96.11		39.6339	-100.284	-16.6495		-36.1543	-2.62305	-24.0189
-25.78	-536	-51		-202.24	-107.217	-128.244		-112.785	-76.4935	-56.4479		32.7473	14.6073	-85.2084
-25.78	-127.6	-51		-119.505	-236.161	-102.46		41.5099	-248.82	-72.5534		-46.5453	20.9137	-67.8457
-25.78	-127.6	-51		65.4681	-126.994	-290.539		38.7379	-44.5229	-63.3717		41.6201	-91.698	10.1583
-25.78	-29.5	-51		22.184	-73.3316	-115.872		-113.552	-144.225	-88.8142		24.5476	-71.0935	-21.7736
-25.78	-29.5	-237		-1.77107	1.10753	-202.924		-158.275	-91.9003	-66.3275		62.748	-26.3066	454.62
-25.78	-29.5	-237		-51.0613	-254.481	-194.615		-56.5686	1.83838	-38.3807		-14.4281	14.0066	-58.0784
-25.78	-29.5	-237		43.6251	-43.9161	-222.094		-355.472	-127.231	-21.2149		-38.2869	-53.3003	-37.2972
-25.78	-29.5	-237		41.4481	3.08173	-113.022		34.0898	-51.5348	-125.454		45.1742	3.10273	-3.82124
-25.78	-29.5	-264.4		-19.5883	-349.533	6.51368		-25.9856	-114.323	-23.1032		52.0212	-73.3846	-52.4461
-25.78	-29.5	-264.4		4.82379	-358.468	-316.071		-49.3951	-137.029	-56.9813		-58.4538	-16.6226	-27.2975
-25.78	-29.5	-264.4		-123.438	-321.03	-297.391		-385.483	-78.1736	19.2748		-45.7246	-22.0653	9.65894
-25.78	-29.5	-264.4		38.6389	46.6155	-2.12073		-257.334	20.3586	-54.6095		4.50724	-74.4711	-62.1955
-25.78	-29.5	-264.4		0.567255	-129.506	-220.034		-446.079	-34.172	-44.2454		28.2642	-29.5353	-9.65087
-25.78	-29.5	-264.4		-170.93	-58.4974	-318.932		-345.47	-121.383	-95.2006		38.4711	-13.6331	245.503
-25.78	-29.5	-264.4		-209.027	-149.585	-195.934		-22.4997	-71.1779	-79.7045		34.0534	-11.0423	24.0169
-25.78	-29.5	-264.4		-7.80738	-421.302	-293.517		-211.313	-152.783	160.63		45.3902	-10.4844	-34.3113
-25.78	-29.5	-60.1		-76.5072	-277.714	-215.418		-247.07	0.250092	130.777		-34.9627	-52.8893	-78.684
-25.78	-29.5	-60.1		-343.673	-249.291	-159.733		-354.454	-204.901	-61.8005		9.12746	9.22561	-40.2691
-25.78	-162.4	-60.1		-41.1372	62.8273	-194.88		-87.9686	22.0363	-101.184		5.40345	83.7275	8.67573
-25.78	-162.4	-60.1		-10.8178	-163.016	-256.79		-126.766	-273.615	-31.5793		-17.4373	-49.5361	-30.5709
-25.78	-162.4	-60.1		-117.907	-109.055	-189.8		-166.757	-46.4366	-30.2059		-38.2217	-35.9079	28.2918
-25.78	-69.6	-60.1		-268.284	-239.192	-205.291		-91.3246	-228.637	-36.6091		-72.6427	29.3148	-16.9791
-25.78	-69.6	-60.1		47.6496	-211.467	-202.818		66.2694	-101.966	-26.5825		50.5442	20.8794	-90.0951
-25.78	-69.6	-60.1		-98.0652	-332.173	-224.297		-257.273	-151.97	-1.44407		0.296657	15.8531	-13.1487
-25.78	-69.6	-60.1		-326.333	-358.827	-266.1		215.519	-62.3621	-88.3488		79.4686	-8.136	11.3516
-510.49	-69.6	-60.1		-230.337	-301.458	-3.25984		52.1203	-88.1158	-30.1088		6.13053	14.7001	-5.6319
-18.5	-69.6	-255.2		-53.2832	-40.6416	-184.114		-127.868	-170.278	-38.3939		57.4646	-121.001	-15.5986
-18.5	-145.9	-255.2		-35.7783	-170.281	-229.353		9.72125	-27.2823	-58.2276		-14.409	-82.4814	25.3597
-18.5	-145.9	-255.2		21.0772	-107.844	-334.954		-172.791	-13.6645	-90.7546		17.806	18.5109	89.2745
-18.5	-586.1	-765.7		-8.02	36.187	-271.821		-299.941	-189.682	-9.96787		14.0305	-60.8019	43.0225
-18.5	-586.1	-3.9		-179.463	-148.197	-207.417		-139.074	-52.4495	-108.224		22.4645	-73.3983	-13.5207
-18.5	-586.1	-3.9		-13.0078	-297.934	-4.33033		-306.117	-194.157	-29.5756		31.5813	14.2724	-65.2879
-18.5	-586.1	-3.9		-129.005	-104.917	-181.337		-101.136	-76.5716	-32.5208		-8.2455	-38.9923	-5.45893
-18.5	-586.1	-3.9		-65.4204	-121.261	-258.61		23.0852	-130.315	-100.375		22.0425	13.2953	-46.5352
-18.5	-586.1	-3.9		-1.39278	-135.714	-289.869		143.584	-12.074	-86.1343		-21.0783	-39.37	-52.7009
-18.5	-586.1	-3.9		-346.853	-101.571	-188.593		-93.9182	-89.8956	-20.9437		20.5782	3.42954	-11.6256
-18.5	-586.1	-3.9		-393.436	-378.708	-281.339		3.90804	-48.1857	-6.02532		2.72351	-38.8519	-31.886
-18.5	-586.1	-3.9		-100.462	-49.9806	-267.459		-284.539	-91.6259	-81.9663		-49.287	-44.8054	-31.6538
-18.5	-586.1	-3.9		69.6647	-291.942	-284.461		-195.569	-111.236	4.14199		-44.0351	10.7903	-56.1008
-18.5	-586.1	-3.9		-69.045	-203.298	-59.3288		-266.386	-155.917	-70.1353		12.7957	-0.980049	-11.5814
-18.5	-586.1	-3.9		-16.4997	-164.023	-74.0931		-151.989	-19.1034	-51.4092		156.537	-61.2595	-23.1234
-18.5	-586.1	-3.9		-20.9076	-61.5123	-267.714		-131.345	-8.17814	-50.1371		-21.8824	-36.3419	-8.78466
-18.5	-586.1	-3.9		-98.5065	-140.587	-389.266		-69.3213	-53.1804	-63.9948		-2.86243	-15.2239	23.0271
-18.5	-586.1	-3.9		-314.49	-182.192	38.3599		-285.313	-28.6341	-44.2		10.0708	-78.0657	-66.9802
-18.5	-116	-3.9		23.4612	-18.0548	-152.236		52.9524	22.5346	-125.603		-61.7962	-17.2248	-19.2859
-18.5	-116	-3.9		-115.37	-145.005	-273.491		-2.82608	-58.2843	-130.754		18.4492	-17.6655	-13.4924
-18.5	-116	-3.9		-240.447	-243.415	-416.003		-104.598	-58.0986	-80.5326		-39.3581	-54.6069	-8.15514
-18.5	-116	-3.9		-95.5587	-238.923	-174.599		-75.0881	-74.6843	-34.2641		-4.40535	21.0428	-1.54932
-18.5	-116	-3.9		-264.318	-190.279	328.954		-164.918	-82.8306	-54.1246		37.2805	-9.15951	-25.9265
-18.5	-116	-3.9		-39.3147	-109.408	-228.835		-108.056	-105.293	15.5591		18.7587	-4.33407	-43.9789
-18.5	-116	-3.9		-299.247	-325.915	-146.295		-363.679	-46.6953	-42.3117		56.279	-5.0661	-4.99115
-18.5	-116	-3.9		-125.29	-393.317	-251.582		-278.257	-199.632	-124.601		-17.8182	-73.1245	-3.63473
-18.5	-116	-3.9		-56.3191	-322.843	-372.552		-126.961	-27.5347	-30.8319		-31.486	-73.6978	-52.2562
-18.5	-116	-3.9		-201.382	-195.12	172.098		-283.676	-150.893	-59.1591		-13.924	27.94	8.48976
-18.5	-116	-3.9		-219.433	-210.188	-274.13		-364.292	-164.985	-79.9888		-0.280087	-3.82275	-72.6168
-18.5	-116	-3.9		-6.96125	4.66138	-218.618		-268.718	-114.288	-77.9114		-29.8385	9.28173	-84.0977
-18.5	-116	-3.9		-43.7953	-135.104	-173.861		-260.632	-262.859	-80.8363		-107.524	-85.0385	14.6546
-18.5	-20.3	-3.9		-195.699	-96.4599	-351.475		-110.83	-75.8061	-48.1665		18.3458	-50.3214	-76.1659
-18.5	-20.3	-3.9		-32.5323	-111.833	-156.701		-185.33	-77.5648	-87.1782		-2.17261	-39.3078	-62.5871
-18.5	-20.3	-3.9		-166.057	-255.864	-339.461		-31.2259	-152.846	-82.6997		-59.5565	-3.21816	7.96478
-18.5	-20.3	-3.9		-181.942	-183.515	-85.5486		-124.58	-102.164	-63.3969		31.7295	-63.2891	-58.8429
-18.5	-20.3	-3.9		38.2601	-301.758	-149.184		-100.91	-107.218	-61.6557		38.0464	-43.6523	6.41145
-18.5	-20.3	-3.9		-57.3979	-198.373	-356.49		-103.809	-183.414	-17.1545		-11.6732	-0.866457	-21.6822
-18.5	-20.3	-3.9		47.4063	-267.637	-167.243		-1.72217	-114.575	-14.2924		18.9556	-16.1688	-27.202
-18.5	-20.3	-3.9		-19.6918	-211.487	-117.23		28.8796	8.55009	-64.3249		2.25142	-15.2794	-13.5702
-18.5	-20.3	-3.9		104.652	-68.9867	-237.324		-449.605	3.55953	-46.304		57.8118	-24.1125	18.1566
-212.7	-20.3	-3.9		-68.774	-291.393	-187.371		-256.458	-38.4448	-112.681		110.014	-45.53	-18.6563
-212.7	-20.3	-3.9		-92.3995	-147.285	-313.086		333.837	-62.0916	-26.9797		36.4572	-19.3739	-21.9435
-9.69	-20.3	-3.9		42.9092	-138.528	-187.604		-98.3825	-26.2857	-36.152		39.7048	-80.2284	-31.1231
-9.69	-20.3	-3.9		-5.86774	-260.68	-222.926		72.7857	-165.16	68.0187		237.304	-32.1334	-38.0512
-9.69	-20.3	-3.9		-193.176	-98.0113	-189.65		-255.263	-4.44301	-42.6304		46.4995	-49.0904	-69.7897
-9.69	-20.3	-3.9		-248.367	-260.251	-215.071		-349.092	-89.8399	-237.784		-45.0583	-47.1104	26.5908
-9.69	-20.3	-3.9		-68.6139	-27.6968	-231.503		-55.329	-47.6201	-103.947		110.244	-66.6648	-36.3072
-9.69	-20.3	-3.9		-310.872	-100.641	-138.758		-155.476	-29.5671	-29.7436		29.8402	-15.3641	-95.1427
-9.69	-20.3	-3.9		-149.842	-240.272	-299.042		-186.167	-74.0612	-52.951		-11.1192	-12.0163	-59.5927
-9.69	-742.5	-3.9		12.3147	-486.019	-284.088		-119.451	-159.1	-89.8857		-3.63298	-32.7349	7.76688
-9.69	-742.5	-3.9		-115.329	-353.193	-254.319		-236.505	-17.4675	-32.0686		-4.20474	-129.943	51.0711
-9.69	-742.5	-3.9		30.9972	-152.128	-139.153		-18.2784	-70.166	-45.2749		14.1783	-54.6684	-69.779
-9.69	-553	-3.9		-26.4596	-276.432	-296.703		-181.195	21.8448	-106.908		-25.0361	-20.8773	36.3995
-9.69	-553	-3.9		-75.4758	-197.724	-262.044		-60.2338	-311.296	-59.2758		41.0194	-52.168	-94.3184
-9.69	-306.3	-3.9		-44.013	-238.997	-282.979		-45.1926	-104.845	-63.9681		22.5678	-79.3691	-36.0312
-9.69	-408.4	-3.9		24.2608	-216.889	-209.853		33.5967	25.1019	-85.7403		12.7021	-82.4754	50.3657
-9.69	-255.2	-3.9		-59.512	-12.2305	-149.1		-114.029	-0.398392	-61.1868		67.9728	17.5882	-57.9736
-9.69	-255.2	-3.9		-42.9932	-94.8942	-133.459		-149.22	-179.168	-38.0084		-25.9447	-31.6268	-42.0934
-9.69	-255.2	-3.9		9.38273	-89.3292	-277.706		-100.092	-140.567	4.50807		-33.0665	-101.45	22.6281
-9.69	-43.8	-3.9		4.0031	-43.0947	-253.015		33.6807	-113.807	-113.553		23.9347	-56.2535	11.3333
-9.69	-43.8	-91.2		4.11682	-160.932	-178.415		-272.105	5.5829	-49.2169		1.20707	20.9963	-25.4405
-9.69	-43.8	-91.2		-141.521	-266.9	-383.638		84.8587	-155.348	-82.3235		97.0819	-24.6443	-25.1882
-9.69	-43.8	-91.2		-40.3481	-126.54	-414.153		-28.2702	-17.9356	-38.4544		44.4864	-35.3232	-31.7123
-9.69	-43.8	-91.2		-29.6905	-77.0062	-20.2185		-162.147	47.797	-44.9301		21.1973	-39.9403	50.1629
-9.69	-43.8	-8.4		-63.8406	-119.656	-343.356		-54.3893	-129.807	25.6126		-33.2326	39.3836	-11.4145
-765.73	-43.8	-8.4		-101.455	-67.9603	-387.253		-388.526	-46.7016	-82.0531		-61.3973	32.6023	-0.912588
-364.64	-43.8	-8.4		-57.1864	-212.198	-340.095		-41.8383	-169.419	-42.8017		-36.9999	-30.416	-83.3991
-364.64	-43.8	-8.4		-183.014	-109.445	-179.393		-154.774	-54.2371	-74.2139		-35.1361	-99.6276	-33.587
-364.64	-43.8	-8.4		-50.5991	-163.67	-212.477		-357.884	-117.147	-19.3669		-3.98753	-76.2911	-32.2184
-364.64	-43.8	-8.4		34.0327	-66.3076	-180.478		-34.3715	-134.38	-28.3263		53.5328	23.8875	-0.925879
-375.36	-43.8	-8.4		-213.467	-231.261	-161.323		-39.9999	-43.0911	-67.7907		9.10886	-3.61504	40.234
-375.36	-43.8	-8.4		59.5623	-196.623	-258.045		27.2953	-3.43319	-56.4035		57.8282	-26.6908	17.0557
-375.36	-43.8	-8.4		67.0118	-43.398	-190.661		-81.5454	-69.1911	-111.367		8.63394	-30.8576	-30.169
-375.36	-43.8	-8.4		-112.801	-98.9766	-119.809		-54.2777	-84.1811	10.361		12.3631	-133.786	-62.1654
-375.36	-43.8	-8.4		-150.151	-93.9146	-238.372		-250.834	-2.31083	-33.8565		54.5181	-88.6034	-16.1645
-120.12	-43.8	-8.4		-130.921	-161.151	-276.505		-189.665	-63.7724	-31.8327		60.0584	-59.9795	-108.458
-120.12	-43.8	-8.4		-189.156	-120.148	-239.117		7.11441	-97.5084	-105.924		-21.8618	-58.3673	-39.0108
-120.12	-43.8	-8.4		-49.9481	-192.355	-294.133		-184.592	-71.1542	-15.6737		47.674	-39.3202	-26.3396
-120.12	-43.8	-8.4		-154.965	-276.753	-369.531		-290.723	-142.005	-77.5324		32.5029	-93.4236	51.3042
-120.12	-43.8	-8.4		-240.622	-304.277	-304.222		42.1252	-74.5633	4.4532		51.2178	-65.9741	-81.6043
-816.78	-43.8	-8.4		-50.0726	-89.9397	-243.772		-110.553	-219.226	-60.1928		-1.60212	-38.6389	-66.0038
-102.1	-43.8	-8.4		-301.46	-192.894	-184.55		-207.458	-67.9777	-52.8203		16.8554	-16.8684	-35.3303
-18.56	-43.8	-8.4		-428.939	-231.766	-291.917		-127.407	-66.532	-32.8384		51.9963	-19.1426	-44.3055
-18.56	-43.8	-8.4		-198.057	-200.58	-293.875		-122.74	-113.206	-55.1439		-0.573646	-52.7314	-4.56026
-18.56	-43.8	-8.4		-150.056	-130.489	-312.905		-4.07713	-85.9934	-26.4851		-76.63	7.82397	-84.6636
-18.56	-43.8	-8.4		-109.465	-147.772	-214.373		-292.119	-93.838	-52.3605		-9.11832	-72.3918	37.213
-18.56	-43.8	-8.4		-87.4097	-208.632	-307.301		-102.004	-121.977	-68.4565		-39.7755	-33.6619	-48.3203
-18.56	-29.2	-8.4		-243.945	-314.267	-307.285		76.732	-221.305	-112.668		39.5276	-44.5958	7.92133
-18.56	-29.2	-8.4		-60.4543	-384.02	-247.015		45.723	-176.369	-17.345		-17.5781	-18.666	-14.4734
-18.56	-29.2	-8.4		-181.503	-27.2146	-188.676		-197.492	-241.562	-57.5892		-29.4857	18.668	2.33178
-18.56	-29.2	-478.6		-243.448	-11.0285	-331.981		-53.8854	-74.7639	-39.0335		-4.23044	-15.5896	-6.88013
-18.56	-29.2	-478.6		-43.0883	-60.2561	-151.934		-142.011	-116.961	211.947		-27.3401	22.2741	-131.768
-18.56	-29.2	-478.6		-156.635	-105.962	-154.955		-235.435	-330.743	-132.235		-19.2766	-36.2991	-41.3404
-18.56	-29.2	-478.6		-143.156	-108.263	-92.8833		-144.488	-131.604	-80.0388		-10.3352	-38.1739	-46.1267
-18.56	-29.2	-478.6		7.05439	-243.433	-201.101		-79.616	-23.0453	-0.355204		81.7414	5.45925	-29.0227
-18.56	-29.2	-340.3		-98.3088	-48.4803	-338.145		-194.202	-91.5134	-34.2241		-30.1054	-27.2389	2.19958
-18.56	-29.2	-340.3		-224.189	-56.4198	-262.812		-111.53	-27.3554	9.21805		15.9652	-120.773	-63.8685
-18.56	-34.6	-127.6		-6.91404	-40.1816	-224.045		-151.772	-32.0456	-67.5453		-21.115	17.0709	-14.1486
-132.02	-34.6	-127.6		30.7812	-122.496	-66.437		-93.7802	-38.4144	-35.7393		27.4919	-64.1909	-9.24234
-132.02	-34.6	-162.4		-87.1003	-250.068	-207.844		-57.4046	-33.9468	-46.3332		-47.3638	-32.5002	-48.8443
-132.02	-34.6	-162.4		110.881	-38.2327	-307.117		-60.4545	-23.621	-165.67		-38.0507	-23.0199	-67.7382
-132.02	-34.6	-162.4		-65.0079	-401.589	-288.769		-180.339	-6.90424	2.00734		-10.6388	-35.4726	-26.2572
-132.02	-34.6	-340.3		-253.28	-122.636	-150.223		-259.793	-231.99	-60.8788		69.4871	-74.8088	5.67551
-132.02	-34.6	-340.3		-27.4005	19.777	-295.323		-106.668	-184.965	-18.3369		-46.7324	-20.1293	-26.6149
-132.02	-34.6	-340.3		-170.614	-202.67	-244.175		-97.1439	3.42475	-45.9901		-3.48754	-127.171	-40.395
-132.02	-34.6	-446.7		-99.979	-400.701	-311.252		-88.8914	-98.5354	-131.296		36.1069	-34.9111	-18.5541
-561.54	-34.6	-85.1		-270.372	-210.013	-164.947		-121.734	-108.718	22.3899		20.4983	-40.8255	-50.0655
-446.68	-34.6	-85.1		5.74879	-75.5951	-171.585		3.69745	-76.1878	-6.23057		-23.1083	-32.5371	-70.9255
-446.68	-34.6	-85.1		-37.2966	-231.046	-183.084		-88.5701	-34.603	-39.5494		36.1203	-37.9121	-61.9121
-26.4	-34.6	-480.5		-124.717	-105.905	-132.587		6.38971	-107.696	18.1839		12.6507	-0.951528	-21.9876
-26.4	-34.6	-480.5		-140.817	-37.5493	-271.431		-30.0269	-149.708	-12.7287		-45.8041	-6.59736	-94.4787
-26.4	-34.6	-480.5		-80.7697	-119.977	-353.887		-211.973	-151.962	-73.5598		35.8998	-84.8305	-71.1442
-26.4	-34.6	-480.5		-84.3175	-73.7509	-243.538		-71.8769	42.5129	-87.3274		-28.6087	31.9388	2.26091
-26.4	-34.6	-480.5		-102.074	-145.109	-80.7839		-2.15179	-139.243	47.3582		-9.39864	-8.44295	-78.7959
-26.4	-34.6	-301.7		-51.6207	-318.848	-211.72		467.97	-87.4251	557.816		-31.8917	-12.1399	-65.2141
-26.4	-34.6	-301.7		-289.057	-119.308	116.187		24.2416	-148.201	43.2688		113.176	-61.5363	-5.21047
-26.4	-34.6	-301.7		-38.2727	-210.677	-87.0107		-187.308	-172.554	-38.5508		-1.22307	-26.4032	-47.9749
-6.9	-34.6	-63.8		19.8954	-59.2723	-426.585		-114.92	-107.585	-2.40754		14.1307	-11.9028	-41.6413
-6.9	-34.6	-63.8		-97.6812	25.4049	-200.37		-247.446	-80.2581	-79.3264		-12.8007	-30.3825	13.753
-6.9	-34.6	-63.8		-115.715	-73.9834	-220.401		-161.511	-85.1403	136.685		-1.38564	-81.8017	-75.3912
-6.9	-34.6	-290.5		17.8901	-342.52	-183.179		-165.794	-55.3598	19.2602		45.546	16.4957	-26.5382
-6.9	-34.6	-290.5		-220.219	-53.6707	-318.628		24.3213	-118.517	-55.7889		39.9898	-81.0689	0.884797
-6.9	-34.6	-290.5		-102.706	-14.2337	-339.261		52.9074	-59.8278	-58.6367		2.96943	20.4261	-5.85354
-6.9	-34.6	-290.5		47.2914	-168.009	-165.941		-80.0033	-9.79808	36.1248		80.7308	-7.30152	-48.8148
-6.9	-34.6	-290.5		-39.9007	-127.455	-76.7134		37.0164	-55.8629	-69.0502		-27.2536	-57.4821	-15.0778
-6.9	-34.6	-290.5		-95.8218	-199.63	-310.053		62.2715	-111.054	-86.486		-29.826	20.6774	43.8299
-6.9	-34.6	-290.5		-180.444	-236.099	-168.689		-130.968	-141.591	-104.685		31.2186	-60.8884	-30.5438
-6.9	-34.6	-290.5		38.3999	-468.446	-297.939		-198.543	-123.138	-53.9935		35.4337	-66.8856	-35.498
-6.9	-34.6	-7.5		-94.8762	-332.138	-184.338		-235.924	-22.4669	-131.533		79.402	-32.6837	29.9282
-6.9	-34.6	-7.5		-67.1688	-167.409	-268.49		-28.636	-100.943	-60.3036		-27.5881	-5.79091	-65.0037
-6.9	-34.6	-7.5		-44.4374	-112.129	-198.977		-236.298	-220.589	-32.8096		-25.0151	27.5423	-89.5569
-6.9	-34.6	-7.5		-128.646	-94.9832	-270.638		-83.3132	-110.716	-68.8711		39.879	-25.8662	-57.2837
-6.9	-34.6	-7.5		-8.91638	-193.234	-168.251		8.88978	-108.891	-109.642		17.474	-12.9066	-29.68
-6.9	-34.6	-7.5		-26.0415	-74.1811	-323.273		88.6557	-77.5719	28.2163		-20.575	-32.9307	324.052
-6.9	-34.6	-7.5		-5.57264	-42.5253	-155.847		-198.542	-79.7185	-33.444		-21.527	-9.56882	-44.0072
-6.9	-34.6	-7.5		-270.392	-41.1078	-93.2208		-22.3323	-116.502	-19.7505		-37.4715	-103.208	-36.616
-6.9	-34.6	-7.5		60.6458	-107.926	-155.765		-63.8823	-61.8424	495.408		26.801	-59.0444	-60.9612
-6.9	-34.6	-7.5		-18.4476	-74.0355	-392.935		-165.18	-83.7862	-89.838		-99.6514	-110.65	7.68721
-220.44	-34.6	-7.5		46.8889	-207.099	-454.625		-227.456	86.0739	-45.7825		-2.31646	-50.6483	43.7079
-220.44	-34.6	-7.5		-10.1145	-9.43671	-149.848		37.6055	-129.722	-8.54329		37.5374	-95.724	-16.5245
-220.44	-34.6	-7.5		63.3342	6.13736	-314.67		-248.968	-30.8113	-116.469		6.7178	-70.4008	14.1932
-220.44	-34.6	-7.5		-108.983	31.132	-211.563		-80.2403	-12.2335	-31.9344		118.688	-88.2645	-1.1996
-220.44	-34.6	-7.5		-14.6744	-6.87314	-166.777		-235.052	-178.147	-83.5463		196.186	0.392204	-3.47707
-220.44	-34.6	-7.5		-72.2617	-220.968	-362.308		-164.647	-35.5766	-55.074		43.1983	-30.6826	-66.2696
-499.39	-34.6	-7.5		38.6682	-115.691	-174.931		-141.638	-102.929	-64.5257		74.4445	-40.2311	-52.1035
-499.39	-34.6	-7.5		-49.3476	-165.576	-328.997		-176.029	116.219	16.8595		7.03428	-105.071	-13.9437
-499.39	-34.6	-7.5		-225.989	-6.48836	-170.022		36.0836	-93.9184	221.301		-15.2193	37.6854	-44.9215
-499.39	-34.6	-7.5		-25.6456	-333.045	-152.374		32.6768	-127.332	-20.8417		20.4607	-70.5404	-8.5926
-499.39	-190.4	-7.5		-24.7648	-97.1462	-165.905		-101.86	-72.1561	-123.817		-8.09752	-49.5124	3.40904
-499.39	-190.4	-7.5		-54.0825	-16.6403	-292.441		-307.81	-140.78	-70.2458		-26.0486	-53.4841	-12.5902
-499.39	-190.4	-7.5		-166.544	-148.215	-276.496		-195.343	-2.23042	51.8379		22.8653	-33.0059	-34.6425
-198.52	-190.4	-7.5		-8.08345	-189.981	-66.8142		-25.4789	-68.559	10.2466		-49.285	-42.4156	-62.6832
-198.52	-190.4	-7.5		-147.677	-250.918	-265.632		-148.307	-87.6076	-12.3818		28.1723	8.13977	-125.131
-198.52	-190.4	-7.5		-165.749	-124.123	-29.667		23.0506	-169.924	-56.148		32.9547	4.37571	442.238
-255.24	-190.4	-7.5		-52.9754	-178.383	-257.708		-99.3347	-106.039	-45.6295		61.5995	-38.7026	-12.2753
-85.08	-190.4	-7.5		-112.219	-267.614	-176.996		-319.521	-72.4626	-73.7698		71.8858	63.1204	14.4252
-85.08	-190.4	-7.5		-20.0592	59.1862	-273.486		-32.2128	-63.5648	-74.6975		27.4184	54.8969	-28.0192
-484.97	-190.4	-489.2		-291.149	-70.5517	-195.657		-305.941	-154.689	-61.0307		-32.9196	-8.37204	93.7683
-484.97	-190.4	-489.2		-45.8256	-51.4559	-299.409		-222.394	-49.3968	7.21547		-64.6591	6.08222	62.8357
-484.97	-190.4	-489.2		-196.499	-88.2297	-143.112		-116.021	-19.9221	6.16535		71.2163	-100.429	-28.5226
-484.97	-190.4	-127.6		-165.57	-141.555	-240.363		-91.3313	-94.004	-98.5036		27.0963	-43.613	501.019
-484.97	-190.4	-127.6		-372.233	-169.691	-170.881		-277.351	-29.7553	-76.2419		-7.99754	-56.7892	-13.67
-484.97	-190.4	-406.5		-131.553	-99.8306	-227.007		-135.369	-57.238	-76.0108		-129.88	20.9673	-0.830819
-1340.03	-190.4	-406.5		20.6778	-62.4839	-291.443		-249.26	139.272	-88.7671		63.8247	-63.3224	-8.42403
-145.85	-190.4	-406.5		-7.60315	-98.1182	-458.921		-253.304	-245.106	-91.8594		12.4514	40.704	0.780147
-145.85	-234	-406.5		-155.988	-194.653	-239.849		-209.204	-161.898	2.03221		-71.6224	1.00667	16.8386
-145.85	-234	-406.5		-169.613	-199.072	-85.7342		-115.745	-88.3926	-98.8024		43.4532	-14.1324	-68.8592
-145.85	-234	-406.5		78.0805	-101.631	-225.277		-100.214	-104.804	-54.8733		10.8313	-21.9065	-4.24483
-95.72	-319.1	-406.5		-68.6157	-275.874	-236.788		-91.9442	-56.483	-41.1408		-1.67155	-94.2852	-30.0718
-95.72	-183.5	-406.5		-97.3862	-148.333	-185.06		-209.32	-78.8918	-42.019		-29.7322	-36.0714	3.55453
-95.72	-183.5	-319.1		-56.442	-37.0155	-193.824		74.3056	-184.649	-15.6146		-15.7061	-21.1273	-23.0037
-95.72	-183.5	-319.1		-57.3097	-184.051	-195.512		-112.676	-164.479	-16.3966		49.2333	-57.3902	1.8481
-5.49	-183.5	-680.7		-110.938	-250.567	396.221		40.7993	22.623	-81.4132		-11.9213	-17.064	-11.2172
-5.49	-183.5	-680.7		-118.111	-57.4477	-18.1059		-45.2581	7.7026	-43.5626		-3.54304	-58.3614	-37.941
-5.49	-183.5	-680.7		19.9087	-78.5252	-212.617		-187.592	-43.0686	-41.0751		-39.5395	4.47329	1.84468
-5.49	-183.5	-580.1		-22.9115	115.837	-184.032		-20.5646	-161.305	-70.8418		-25.4366	-71.4309	-10.1856
-5.49	-183.5	-580.1		-141.829	-141.879	-170.957		-87.1372	-110.776	-72.1915		17.0338	-9.7725	-49.5758
-5.49	-183.5	-580.1		-101.631	-156.095	-232.669		-275.463	-67.2248	-79.3173		-50.3071	-50.7252	8.20341
-5.49	-150.8	-328.2		-76.358	-189.651	-80.9603		34.9671	-73.4952	2.15774		25.3468	-105.371	-99.7406
-5.49	-150.8	-328.2		-18.059	-53.031	-355.733		-272.758	-133.544	-115.649		58.612	-82.1337	26.4232
-5.49	-150.8	-99.9		-136.789	-164.98	-166.489		-235.732	-49.4638	-67.8895		-17.4757	-23.4243	116.77
-5.49	-150.8	-99.9		-24.5304	-19.004	-393.311		-18.2877	-73.243	-59.9743		19.5723	-108.079	149.182
-5.49	-150.8	-99.9		-96.1875	-100.136	-192.519		-65.1267	-20.7906	16.2658		-58.7	-43.2869	-16.6099
-5.49	-150.8	-99.9		-10.7693	-153.976	-244.719		-122.199	-63.1984	-125.784		-62.6265	-0.275457	-37.7803
-5.49	-170.2	-99.9		-32.1615	-164.926	-285.549		-245.108	-1.92793	-28.4713		9.70587	-75.8558	12.5922
-5.49	-170.2	-99.9		-77.6047	-137.369	-416.39		14.482	116.311	320.827		26.2039	-27.9378	-59.4746
-5.49	-166.2	-99.9		-279.589	73.1291	-120.191		-15.0756	-70.527	-50.8162		-93.614	-35.9569	-85.3463
-5.49	-166.2	-328.2		5.99815	-362.684	-111.858		-9.2016	-70.6259	-97.3202		25.7834	-92.5654	-72.1895
-5.49	-166.2	-328.2		28.3981	-174.697	-238.302		-241.349	-26.9981	43.6137		10.6128	-40.7937	-47.8271
-5.49	-166.2	-247		-345.229	-255.202	-246.288		-61.0244	-66.2913	-49.1235		14.0275	-30.0972	10.7512
-5.49	-166.2	-247		-314.216	-9.11438	-231.8		27.9782	-146.636	-57.1556		9.18911	54.9064	-40.1325
-5.49	-166.2	-247		-56.2308	-186.398	-164.104		-5.33748	-34.6102	-2.65215		36.1453	1.3353	-38.305
-5.49	-166.2	-247		-175.111	-34.8819	-304.385		-210.262	-113.424	-99.8925		-7.55512	-66.2909	210.095
-5.49	-166.2	-247		24.6758	-201.658	-321.635		-210.265	-19.9804	-8.96222		3.87644	-60.8462	67.0451
-5.49	-166.2	-247		-95.4559	-48.913	-295.4		44.8476	-150.186	-103.692		-8.09584	-55.384	-8.1184
-5.49	-166.2	-247		13.2722	-245.284	-170.064		-188.096	-18.8057	-66.4061		30.7267	-78.5996	14.3986
-5.49	-166.2	-247		-83.1988	-91.6176	-219.456		-221.749	-205.509	38.2628		1.40215	-38.0054	-26.6764
-5.49	-166.2	-247		-213.35	-67.9583	-181.772		-90.2174	-71.7279	-54.0113		-25.9319	-127.492	-57.5846
-5.49	-166.2	-182.3		-164.579	-68.5984	-167.107		-185.077	-114.938	-40.6552		25.0939	-41.4948	-57.9265
-99.26	-166.2	-182.3		-130.724	2.15706	-120.146		-45.4802	-163.39	-8.19627		-17.3563	-134.792	-84.3449
-99.26	-166.2	-182.3		-311.474	-158.752	-232.125		-124.706	-107.738	-12.3632		-4.77289	-42.0168	-47.3454
-99.26	-166.2	-182.3		-54.9017	-125.076	-174.693		-57.2623	-99.8379	7.48188		40.8632	9.48209	-19.9479
-99.26	-166.2	-182.3		-80.9275	-317.713	-132.131		0.490881	-95.3813	-48.5178		-13.0627	-63.7773	-0.137537
-99.26	-166.2	-182.3		-3.22678	-27.8861	-151.764		-79.2087	-78.0476	-86.5181		46.7151	-7.2961	30.2227
-10.21	-166.2	-182.3		-206.691	-81.9478	-272.046		28.2725	-9.48221	-17.6461		-14.8653	-38.1403	-80.4743
-10.21	-166.2	-182.3		30.5784	-125.647	-176.353		-34.2702	-65.9806	-82.2539		329.448	-53.1569	-6.5392
-10.21	-166.2	-96.8		-8.09776	-160.787	-123.418		-83.0129	-39.0744	-41.2359		35.8257	-2.27073	-51.9214
-10.21	-166.2	-96.8		29.8916	-183.093	-121.252		-11.9499	-46.0133	-11.8823		-28.4966	7.00608	-9.92076
-10.21	-166.2	-96.8		-82.7222	-119.314	-205.322		-175.654	-83.5888	-113.658		-49.0967	-60.4327	-65.8386
-10.21	-166.2	-96.8		-87.7319	-280.631	-283.906		-177.77	-147.781	-55.1688		-57.055	-12.4282	13.9674
-10.21	-166.2	-96.8		-238.479	-246.702	-185.601		-392.713	-47.1091	-106.632		66.9233	-43.5516	-50.7275
-10.21	-312	-96.8		-335.428	-29.2061	-131.459		2.06807	-113.774	-85.6005		-3.12343	-16.5657	-8.82524
-10.21	-312	-96.8		-72.9188	-23.3278	-98.4781		-192.211	-182.948	-86.4797		20.6197	8.42323	23.4088
-10.21	-312	-96.8		-54.5229	-44.5679	-397.358		-55.5977	-196.512	-26.0932		357.285	-109.892	347.153
-10.21	-16	-561.5		-37.6666	-170.975	-247.343		24.2244	-232.333	-78.6599		8.95009	-109.059	-61.365
-10.21	-16	-255.2		-22.141	-129.286	-226.783		-233.653	-84.3835	-95.8719		-24.5952	-94.6377	61.4899
-10.21	-16	-127.6		-99.0086	-84.5408	-84.1694		53.4103	-14.715	-42.7125		-21.3548	-26.194	-49.431
-10.21	-16	-127.6		-143.704	-62.9994	-146.722		-9.75044	-209.083	-57.6924		3.371	-73.7252	-45.4974
-76.13	-16	-127.6		-135.7	-105.994	-193.336		-25.609	-89.9083	3.93911		17.2066	-44.0647	-62.732
-76.13	-16	-191.4		-168.194	-81.9896	-136.792		-178.457	-65.2843	-27.1344		54.5694	165.278	-45.3485
-76.13	-16	-191.4		-108.675	-1.35664	-145.102		45.5539	-119.145	-34.4955		-22.734	-80.3487	-4.87627
-76.13	-16	-191.4		-340.599	-81.4565	-255.737		-78.9257	-37.9686	-74.8243		53.5649	-55.5493	-34.993
-76.13	-16	-191.4		-76.1878	-202.911	-188.693		-114.776	-58.793	-95.1967		1.23401	-13.2352	-21.0332
-76.13	-16	-191.4		-47.3975	-152.036	-140.515		-221.562	-119.358	-30.7345		-52.025	-112.786	-50.9162
-76.13	-16	-191.4		23.6054	-1.7822	-232.652		-113.287	-107.145	-30.1662		14.9465	-23.7512	-14.2992
-76.13	-16	-191.4		-258.466	-196.195	-40.4696		-159.368	-128.701	-23.4183		48.0713	-35.4382	-35.1713
-76.13	-16	-57.2		2.00252	-320.271	-442.897		-222.328	-48.0232	-92.7252		39.7334	-14.9443	-24.5578
-76.13	-16	-57.2		-65.5846	-124.065	-246.623		-84.0678	-98.8845	-44.8034		-52.0251	11.611	-46.5175
-76.13	-8.7	-57.2		52.9227	-113.908	-184.053		33.1668	-63.2199	-0.0544246		19.281	-62.0505	-5.98129
-76.13	-8.7	-57.2		29.6635	-57.463	-149.981		98.2654	-112.452	210.149		-19.9454	-71.0152	-24.1651
-76.13	-8.7	-57.2		-69.0829	-109.405	-277.456		-31.4369	-14.0552	-49.0231		16.5643	-39.8045	-38.4064
-76.13	-8.7	-57.2		-13.7079	-112.261	-146.409		19.9037	-174.789	-161.988		-14.6833	-19.6239	41.0763
-76.13	-8.7	-57.2		-208.366	-141.983	-162.065		-206.733	-25.5051	-41.9755		3.062	-32.1004	-72.388
-76.13	-8.7	-57.2		-95.5631	-101.727	-139.638		-196.479	-15.5974	-57.9285		35.9632	1.47317	-60.2468
-255.24	-8.7	-57.2		6.98321	-115.752	-500.529		-46.3526	-21.8306	-31.0371		-16.2198	-34.87	-48.9976
-255.24	-8.7	-57.2		-204.133	-36.8268	-191.07		-102.314	4.72993	-114.264		25.2311	-93.8324	-19.3978
-188.08	-8.7	-57.2		-72.7607	22.4455	-180.758		-348.934	-113.177	-52.4082		-5.50614	-62.135	-78.0145
-188.08	-8.7	-57.2		-10.1449	-201.895	-210.468		-141.316	-247.363	-96.1817		-37.8817	89.4759	-29.6272
-188.08	-8.7	-57.2		-157.884	-200.11	-164.676		-437.971	-188.655	-84.9694		9.69917	-103.412	-18.6688
-188.08	-8.7	-57.2		-84.3148	-175.105	-207.355		-142.153	-196.778	-109.045		135.485	36.0224	201.137
-188.08	-8.7	-57.2		-103.802	-120.261	-164.695		-312.084	-62.9402	-32.6683		56.082	-27.7968	516.542
-42.54	-8.7	-57.2		-20.6442	-112.576	-170.263		34.7607	13.5542	-69.6049		-48.6261	3.2338	-41.4687
-42.54	-8.7	-57.2		-42.4867	-155.742	-122.247		-220.607	-27.1735	-77.4291		239.445	-44.3058	39.6243
-42.54	-8.7	-765.7		-265.826	-100.417	-124.906		-222.453	-64.6991	-10.2878		21.745	-5.11271	10.8817
-42.54	-8.7	-765.7		-254.1	-154.744	-135.652		-260.943	-25.7304	-46.6569		9.70877	-23.4287	-52.6321
-42.54	-78.5	-765.7		-174.043	-147.941	-241.291		-380.383	-187.577	-3.02873		-6.1059	-30.5588	-10.422
-42.54	-78.5	-218.8		83.1376	-91.4982	-274.628		-224.097	-87.6302	8.76346		6.01328	1.30206	134.012
-42.54	-78.5	-218.8		-135.437	-73.3103	-377.902		-275.407	-40.1055	-28.3435		-8.26852	22.9513	-24.267
-42.54	-78.5	-153.1		-39.7189	-18.3135	-206.381		242.39	-261.358	128.328		11.8226	-83.8026	-38.8501
-42.54	-201.8	-216		-217.318	36.6621	-262.719		-198.103	-46.8693	-91.0527		-0.0143202	-88.083	-41.578
-42.54	-201.8	-216		-395.151	-147.695	-153.798		-262.741	-63.6103	-3.33012		29.5331	-0.738024	46.6818
-42.54	-201.8	-216		-109.31	-176.446	-248.708		-262.466	-229.804	-88.9066		25.9499	19.8943	-10.5528
-42.54	-201.8	-216		-213.178	-293.113	-256.385		-5.40095	-65.2184	-34.0977		16.3643	21.8912	-65.7637
-42.54	-201.8	-38.7		-156.749	-218.101	-188.169		-325.66	-26.5764	-25.7618		-48.6155	8.94192	-61.4257
-42.54	-201.8	-38.7		72.7369	-184.289	-88.6373		-129.356	-162.043	-131.206		2.37327	-84.0109	-11.5236
-42.54	-201.8	-38.7		-55.6761	-220.852	-267.186		-85.7394	-102.471	-37.9706		42.8903	-57.9613	-68.7966
-42.54	-201.8	-38.7		-12.8817	-86.9854	-220.568		-117.083	-122.985	-48.3881		31.6766	-12.4521	-25.4433
-42.54	-201.8	-38.7		-198.303	26.643	-178.21		35.794	-127.289	-1.48268		23.5652	-37.4635	-45.7496
-42.54	-201.8	-38.7		-140.217	-86.6203	-205.111		-66.4684	-147.618	-95.1883		1.40816	26.9304	57.0991
-42.54	-201.8	-38.7		-105.002	-33.0344	-301.519		5.99912	-54.1449	59.2743		6.67634	-63.3503	13.2243
-42.54	-201.8	-38.7		-57.3401	25.7086	-286.804		-116.308	28.4537	-55.2453		-23.5059	-40.5251	-31.3476
-42.54	-31.9	-38.7		34.8301	-11.2331	-107.31		45.0013	32.9904	-30.8887		-76.0345	-87.2746	23.1815
-42.54	-31.9	-58.9		32.1101	-130.731	-55.7103		-62.941	-103.498	-92.4887		38.2849	-60.0942	495.99
-42.54	-31.9	-58.9		-239.796	-147.8	-281.614		31.3941	-90.6306	-135.293		34.8775	69.6038	-81.9362
-42.54	-31.9	-58.9		-352.449	127.892	-80.0063		7.96645	-6.89265	-77.0586		-42.8637	-54.9269	-87.2428
-42.54	-31.9	-58.9		-37.9897	-41.0828	-293.956		-83.1526	-33.6406	-36.2729		10.9602	-63.5153	9.78283
-42.54	-255.2	-58.9		-54.337	-128.588	-210.417		-152.301	-112.406	-31.3561		-17.9312	19.9061	12.5074
-42.54	-26.9	-58.9		-161.201	-330.738	-191.501		119.585	-196.026	-35.5562		67.1569	-57.878	-47.1299
-42.54	-26.9	-58.9		-4.34462	-343.574	-226.651		-13.3607	-94.1927	-43.5524		-39.4318	-42.1181	-36.4518
-42.54	-26.9	-21.9		-104.059	-294.281	-285.373		-374.449	-200.45	-42.0212		15.3784	-34.0453	-31.9438
-42.54	-26.9	-21.9		-216.684	2.01326	-163.575		-215.706	-190.613	-39.5045		-13.0803	33.1181	-135.928
-42.54	-26.9	-21.9		6.40386	-111.775	-118.06		69.0994	-141.234	-86.2324		24.1059	-25.6763	-33.4637
-533.69	-26.9	-21.9		-81.7206	-248.264	-71.0552		-137.545	16.8535	-53.2668		27.4937	20.04	-34.051
-533.69	-26.9	-21.9		-82.9535	-126.323	-121.252		-124.182	-85.1836	-85.1346		39.6178	18.4202	-20.7383
-533.69	-26.9	-21.9		-104.804	-286.505	-260.547		41.7652	-68.9835	-20.4217		40.3151	28.2153	35.2042
-533.69	-26.9	-21.9		-93.679	-138.862	-440.219		-66.4238	-138.483	-41.9052		-48.8205	-14.7449	37.9402
-533.69	-26.9	-21.9		-105.607	-159.972	-380.691		-31.4521	-168.849	-49.131		24.2163	-51.6316	58.4935
-533.69	-26.9	-21.9		-67.1803	-179.734	-429.008		-37.5972	-34.7839	-54.4287		29.8103	-50.2187	-23.6558
-542.4	-26.9	-21.9		-208.642	-175.035	-182.217		-319.06	-74.7424	-28.4867		0.546763	-37.7477	2.70142
-542.4	-26.9	-21.9		-100.838	-195.01	-161.469		-73.0741	-47.8285	-61.473		11.3588	-31.7232	10.4577
-146.96	-26.9	-21.9		-241.769	-233.485	-211.742		-309.768	-52.0814	-14.4264		54.122	-97.5511	-104.58
-146.96	-26.9	-21.9		-444.047	-121.448	-89.7751		75.3117	-102.025	-59.6493		-62.3124	-43.7013	-15.4265
-146.96	-26.9	-21.9		-188.226	-20.7322	-377.59		-84.15	-134.027	-155.495		5.68714	-35.4255	-4.33454
-146.96	-291.7	-21.9		62.0811	-223.275	-348.939		-19.4984	-152.11	-156.679		57.824	-81.0708	-66.0988
-146.96	-291.7	-21.9		-148.64	-96.0231	-374.547		8.33635	-166.037	-48.1009		2.72645	-17.8589	8.19605
-146.96	-21.3	-21.9		-73.5879	-222.331	-232.791		-76.8494	-121.602	-68.1185		147.446	-21.7364	-10.2478
-146.96	-21.3	-21.9		-157.592	-196.598	-133.767		-73.0989	-192.299	-192.533		2.94823	-94.6734	-25.7424
-146.96	-21.3	-21.9		-397.207	4.10578	-337.01		-112.887	-145.473	-47.6039		18.6006	-137.862	-43.5661
-146.96	-21.3	-21.9		-75.1464	-174.562	-210.244		69.6465	-142.401	-55.7582		44.9977	-44.5576	-18.5805
-159.53	-21.3	-21.9		-172.302	-77.3832	-188.239		-138.487	-88.8295	-77.3223		-24.3146	-89.6597	-45.8853
-159.53	-21.3	-21.9		-151.78	-125.171	-90.3391		-276.151	-128.755	-61.0211		42.369	-71.0303	-31.9057
-159.53	-21.3	-21.9		110.173	-190.306	-202.102		-348.503	-11.8799	-60.767		38.2646	-24.8735	39.224
-159.53	-170.2	-21.9		-97.6241	16.6641	-243.631		-282.752	-83.5518	-47.3176		15.7611	-1.70479	-58.471
-159.53	-170.2	-21.9		-49.9588	-260.922	-264.207		-263.525	78.877	-56.4963		33.654	-88.5484	-57.7236
-654.06	-351	-21.9		-171.387	-215.295	-134.023		28.0329	97.2593	-67.7893		-18.7716	-31.0754	-35.9668
-654.06	-351	-21.9		21.7749	-100.78	-89.847		-237.746	-123.39	14.5631		-69.4261	26.3048	-54.5109
-654.06	-351	-21.9		-50.247	-53.6776	-236.728		38.0721	-77.9962	27.4989		16.2949	-54.5432	-8.57817
-654.06	-351	-21.9		-120.525	-128.764	-79.531		-24.2503	-109.101	-20.452		38.9508	-38.5966	-0.726814
-654.06	-351	-21.9		0.379902	-214.055	-135.732		44.0463	-43.114	1.23433		3.11696	-13.3744	23.375
-8.65	-21.9	-21.9		-103.367	-138.085	-214.078		-118.175	-71.3706	-46.6555		-1.67458	-64.1385	-73.5299
-8.65	-21.9	-21.9		-106.842	-228.946	-213.185		-170.397	-139.173	-94.7511		-33.131	-7.26176	-74.2492
-8.65	-21.9	-21.9		16.2579	3.12242	-221.108		-4.40933	-147.67	-118.147		20.631	-5.81301	-61.6252
-8.65	-21.9	-21.9		-308.901	-216.63	-292.102		-175.474	-17.1914	-126.143		-8.04972	-84.0942	19.9221
-8.65	-21.9	-21.9		-318.984	-86.7597	-68.0715		-10.2928	23.1804	-110.754		35.1816	-47.6925	-65.0469
-8.65	-21.9	-21.9		-229.112	-41.9488	-304.994		-127.896	19.4631	-87.8588		-56.7109	62.6245	-37.9331
-8.65	-21.9	-21.9		-244.634	-152.171	-238.734		-188.649	-77.1148	-58.8677		-4.75479	-16.8426	-44.3807
-8.65	-21.9	-21.9		-183.822	-424.754	-81.4554		-205.792	-90.6692	-97.7685		36.2895	-90.3413	-4.37109
-8.65	-21.9	-21.9		-30.3091	-235.243	-340.287		-135.231	-2.68707	-161.079		2.92464	-73.1513	-41.7265
-8.65	-21.9	-21.9		10.1529	-290.825	-254.879		-121.122	2.8872	-44.4934		12.9945	17.8915	-21.9211
-8.65	-21.9	-21.9		15.4957	-108.949	-269.771		-86.9113	-130.363	-13.4497		-25.2581	-15.6276	207.395
-8.65	-21.9	-21.9		-134.985	52.4874	-277.823		-169.017	-185.878	20.5688		44.7812	-89.3523	-35.5971
-8.65	-21.9	-21.9		-152.54	-206.99	-177.652		-121.848	-73.5003	-55.8946		16.9254	12.9572	5.40119
-8.65	-21.9	-21.9		-160.704	-345.7	-359.491		-162.116	-32.3515	-17.2542		54.433	-49.4846	-65.0383
-8.65	-21.9	-21.9		-296.008	-174.86	-248.473		33.5282	-99.4003	0.196947		42.5237	8.32932	-58.5886
-8.65	-21.9	-21.9		-48.9583	-96.0171	-179.614		50.9378	-11.8863	6.73599		-59.4489	-19.1627	41.5665
-8.65	-21.9	-21.9		45.6839	-242.5	-272.823		-181.988	-72.373	-117.302		24.22	-1.37609	-5.23139
-306.29	-21.9	-21.9		-78.2546	-147.67	-40.2803		-90.3882	7.6408	-110.671		-4.39149	67.4947	-1.06491
-153.15	-21.9	-21.9		18.3586	-130.072	-103.68		5.26291	-109.29	6.3978		-26.0169	20.4398	16.7043
-145.85	-21.9	-21.9		-168.875	-10.9659	-270.945		-252.554	-203.407	-10.1456		-1.98774	-68.6095	-14.285
-145.85	-255.2	-21.9		-39.486	-158.413	-412.38		-30.7619	2.57482	-122.527		47.2876	28.9348	-68.5768
-145.85	-153.1	-21.9		-249.363	-113.37	-290.255		-80.2582	-239.453	-42.8986		10.0448	-28.6918	-25.8493
-145.85	-153.1	-21.9		13.8484	-121.487	-283.285		-203.079	-118.698	-30.509		39.4991	-92.8872	27.8803
-45.38	-153.1	-21.9		64.3634	-109.399	-108.953		-335.981	-137.454	-101.53		-67.268	-92.3803	-35.6421
-45.38	-153.1	-21.9		37.4864	-137.405	-472.738		-117.699	-165.176	-101.319		83.566	-10.098	-47.2875
-45.38	-153.1	-21.9		-90.3523	-98.2292	-272.537		-228.831	-41.1074	-82.6131		14.1242	-44.6428	-4.40121
-45.38	-153.1	-21.9		-136.308	-107.088	-305.117		-241.121	-157.907	-2.19216		32.2682	-61.8042	-3.87873
-45.38	-255.2	-21.9		53.1134	-54.4787	-384.778		10.2873	-78.09	-30.5357		-0.495863	-71.0082	-21.2664
-45.38	-510.5	-21.9		-73.9502	-42.1958	-259.761		9.46865	-68.1504	-41.7438		33.187	-87.9815	-23.1578
-45.38	-510.5	-21.9		4.58213	-264.482	-165.614		-136.823	49.3687	-68.3357		32.218	-69.6935	37.5143
-45.38	-232	-102.1		-170.557	-96.0641	-272.465		-52.6264	-158.113	-84.0775		-59.5188	-11.3205	-51.9101
-45.38	-232	-795.8		-211.298	-135.374	-273.429		-149.086	-32.4954	-39.3458		3.36343	-27.0431	-32.9047
-45.38	-232	-795.8		-202.699	-138.04	-233.986		-96.2908	27.0352	-28.5292		-18.3019	-42.7493	-22.7255
-45.38	-446.7	-795.8		10.7171	-89.2431	-261.508		37.5693	-73.4894	-51.9638		14.8561	-52.3866	-61.8794
-45.38	-255.2	-795.8		-58.8786	-90.2517	-117.391		-189.336	-133.006	8.64438		-42.7313	-108.986	-51.0129
-45.38	-255.2	-795.8		-18.7097	29.8585	-227.104		-86.0494	42.3163	22.3213		25.3103	-43.6716	38.0343
-85.08	-324.9	-255.2		-35.1018	-181.21	-102.243		104.927	-175.184	3.81299		-19.2627	32.903	-39.4925
-85.08	-324.9	-255.2		-125.388	-90.547	-296.976		-16.8777	-245.025	-58.508		-19.9665	-175.927	-52.3085
-85.08	-324.9	-28.6		83.2849	-303.649	-201.515		-124.192	53.7157	-46.0754		146.135	-105.487	-28.4916
-98.17	-109.4	-28.6		4.52717	-311.999	-230.209		61.9248	-88.5363	-14.9397		41.4679	-20.0432	-82.3434
-98.17	-109.4	-28.6		44.6255	-129.453	-171.225		-162.126	-82.4867	0.516889		-3.10697	-35.8753	-4.93724
-98.17	-316.5	-28.6		-245.611	-82.4775	-259.075		-224.997	-120.953	-87.7671		15.7874	-36.0071	13.7583
-98.17	-316.5	-28.6		-161.225	-258.104	-126.837		14.7371	-3.62546	-73.2203		19.6468	-73.2595	-42.6463
-20.42	-316.5	-28.6		27.6354	-152.03	-124.438		-134.314	-82.5777	-7.35126		141.855	-111.599	-48.4957
-20.42	-316.5	-28.6		-21.8778	-191.006	-123.676		-252.26	-42.0877	-19.0109		371.29	-43.8135	5.00231
-20.42	-316.5	-28.6		38.0908	-278.629	-226.602		-353.873	-68.2605	91.7866		-26.8169	-32.0052	-68.272
-20.42	-316.5	-28.6		-68.3284	55.5346	-271.191		-242.383	-11.7419	-28.1081		-54.0267	41.1713	-22.2646
-20.42	-316.5	-28.6		65.0409	-217.309	-49.0826		-79.4194	-73.144	-46.9259		-29.0092	-35.9456	-38.8347
-20.42	-91.2	-28.6		10.0495	-158.853	-329.75		36.5512	-87.4576	-83.9532		4.91604	-11.5822	-83.2982
-20.42	-91.2	-28.6		-74.277	-99.023	-269.969		-174.805	-41.8919	-90.1565		5.21745	-52.1007	-9.60136
-148.89	-91.2	-28.6		-182.091	-330.502	-360.646		-221.704	-121.203	-52.7305		5.54768	-24.3524	9.93922
-148.89	-91.2	-28.6		-52.2933	-303.299	-196.887		36.1349	-89.4111	-55.6189		66.909	239.923	197.05
-148.89	-331.8	-28.6		-191.368	-197.014	-181.406		-16.3774	-73.9358	-35.7607		18.1382	-27.0907	-8.04925
-20.7	-331.8	-28.6		-275.219	-207.628	-247.743		1.4846	-20.0337	-128.533		-68.8082	-44.2501	-68.5815
-20.7	-331.8	-28.6		14.0399	-141.711	-85.4516		-360.128	-103.919	-167.404		18.001	2.92105	-88.2747
-20.7	-287.2	-28.6		-115.336	-220.579	-255.161		-282.014	-110.042	-11.6448		-46.8174	16.3826	-65.2483
-20.7	-287.2	-28.6		-87.4707	-246.438	-242.541		-212.903	-97.9289	-55.4225		6.69601	-12.7882	14.2632
-20.7	-297.8	-28.6		-53.1252	-273.638	-255.291		-232.322	-143.524	45.7405		-24.5809	-54.4156	-49.8823
-20.7	-297.8	-28.6		-211.906	-69.1958	208.767		-47.3469	16.4509	7.18059		-71.7915	-101.368	-25.3463
-20.7	-198.5	-28.6		-217.754	6.93862	-226.454		-204.583	-214.961	-12.1093		116.812	-39.9883	-75.9563
-20.7	-198.5	-28.6		242.412	-367.207	-87.0111		-118.953	-91.6641	-24.0867		16.7403	13.8894	-75.5521
-20.7	-198.5	-28.6		175.762	-195.003	-344.67		-138.693	-246.98	-112.952		28.6829	-75.8254	5.44454
-20.7	-6.3	-28.6		-217.584	22.395	-217.756		-182.453	-155.095	-67.0236		-39.9684	-115.106	-25.747
-20.7	-6.3	-28.6		-58.7226	-65.0788	-210.928		-53.8037	41.43	-75.2156		76.2443	-36.3227	1.48242
-459.44	-6.3	-28.6		-114.118	-119.124	-260.348		-86.3123	-53.0636	-61.6054		-39.7401	-45.8852	-19.0625
-303.1	-6.3	-28.6		33.9531	-263.756	-206.443		-243.437	-119.301	-24.8108		-12.4357	-109.82	-47.3029
-303.1	-6.3	-28.6		-137.283	-173.564	-320.841		-217.593	-103.398	10.4644		-95.936	8.14236	-31.5358
-303.1	-6.3	-28.6		-276.867	-84.8724	-140.238		-232.885	8.85617	-58.1399		-19.5018	-72.3829	-32.2991
-303.1	-6.3	-28.6		-74.9679	-95.7561	-138.099		-351.695	-76.0594	-150.414		52.1409	-47.2737	-70.9095
-303.1	-6.3	-28.6		-147.175	-49.6177	-195.345		-142.559	-14.8773	-84.1405		-3.43882	32.1489	-7.27957
-149.82	-6.3	-28.6		291.135	-105.936	-148.723		-283.076	-41.1877	-37.792		-48.2563	-39.0888	-33.0718
-149.82	-6.3	-170.2		56.839	-282.031	-313.002		-328.022	-185.985	-52.4079		-3.25162	-20.9955	-34.6348
-149.82	-6.3	-170.2		-35.8922	-69.8791	-110.157		-101.867	4.33001	-52.763		30.2181	64.6558	-76.1632
-149.82	-6.3	-170.2		2.487	-126.872	-161.055		-38.6542	-59.3015	32.9447		-117.567	-11.2778	-70.4829
-149.82	-6.3	-170.2		27.143	-140.843	-296.901		-97.4996	-189.776	-59.0752		-9.82345	-22.4993	-11.711
-149.82	-6.3	-40.3		-44.2196	-157.322	-240.273		-262.002	-66.7877	377.123		-40.0667	-43.4406	-42.8929
-149.82	-6.3	-40.3		-348.266	-87.0408	-423.853		-64.7368	-88.7402	263.16		36.213	-40.3348	9.91475
-149.82	-6.3	-40.3		-132.359	-242.053	-362.168		-239.854	-79.7606	-44.6241		85.14	-133.865	-14.474
-149.82	-6.3	-40.3		-20.0513	-290.941	-178.202		-104.571	-64.1291	-86.5757		-63.2898	10.6741	-8.47663
-149.82	-6.3	-40.3		-70.8398	-3.44664	-304.846		-61.494	-123.07	-40.6026		39.8377	15.2767	-77.3541
-149.82	-6.3	-366.9		-156.99	-24.5343	-211.532		-11.0464	-120.696	-106.383		10.9697	25.9213	2.2005
-149.82	-6.3	-366.9		-215.42	22.5184	-339.214		-108.941	-111.321	-119.344		27.6067	-22.6679	-9.50674
-149.82	-6.3	-366.9		-107.127	-301.5	-286.893		-236.829	-137.801	9.91653		10.8764	-14.8464	2.82101
-565.18	-6.3	-366.9		-108.841	-285.973	-323.577		-33.5973	-102.376	-42.3791		36.4724	35.5733	19.8102
-565.18	-6.3	-366.9		-117.691	-55.3854	-170.812		-63.2095	-152.843	-51.2566		-57.5772	158.927	-32.4631
-565.18	-6.3	-191.4		-26.555	-79.7152	-277.022		-44.6741	-53.6447	1.45359		-71.415	-88.0339	-14.4558
-565.18	-6.3	-191.4		-101.586	-169.634	-274.871		-8.73328	-46.3516	-29.8293		24.7241	-32.4188	-85.2663
-565.18	-6.3	-12.9		-316.615	-190.935	-290.266		-203.75	-108.956	10.2063		102.401	-47.9639	-63.9639
-565.18	-6.3	-12.9		-190.72	-124.039	-291.614		-230.759	-130.97	-121.628		42.3382	-141.553	-46.7445
-565.18	-6.3	-12.9		-273.584	-187.196	-213.488		-174.941	-44.9704	-34.5256		17.3647	-80.838	-30.3677
-565.18	-6.3	-12.9		-49.472	-300.881	-288.849		-101.985	-30.5808	-70.6903		1.15134	-50.5581	-17.0353
-68.07	-6.3	-12.9		-248.854	-242.299	-149.005		-248.776	-77.9879	-72.1897		38.0981	19.9878	-3.15118
-68.07	-6.3	-12.9		-254.165	-72.6463	-230.13		-305.201	-67.9521	-19.6496		18.0623	-40.9326	4.50582
-68.07	-6.3	-12.9		-48.191	-202.925	-274.743		-39.8132	-196.531	-21.6015		38.7577	-85.907	-22.3774
-68.07	-6.3	-12.9		-245.967	-52.2822	-271.402		-20.158	-48.9445	-85.5811		32.3156	-55.9965	-9.51194
-28.65	-6.3	-12.9		-72.036	-242.634	-348.728		-288.536	-118.551	-29.6635		-28.3556	-34.4808	68.8972
-28.65	-6.3	-12.9		20.7119	-110.762	-135.946		-63.755	-116.08	140.503		-12.3811	-54.7655	76.7621
-28.65	-6.3	-12.9		-111.228	-143.512	85.5111		44.7531	-32.7566	-14.4897		33.206	-65.5158	-53.5695
-28.65	-6.3	-12.9		-219.3	-142.477	-66.4845		-132.744	-28.2374	-61.9065		26.8845	15.336	19.3082
-28.65	-6.3	-12.9		-212.964	-87.3154	-247.866		-53.4459	-65.3901	354.874		-43.7009	-61.2533	-47.9046
-28.65	-6.3	-12.9		-59.5997	-272.999	-267.952		-125.31	-47.4859	-60.6508		39.4959	15.5691	7.65867
-28.65	-6.3	-12.9		-21.6946	-61.7926	-418.251		-221.136	-125.851	-26.6868		3.82654	-70.0825	10.8777
-28.65	-6.3	-12.9		-142.446	-74.2291	-28.8952		-238.39	-111.61	-70.9007		-14.9962	22.5928	-49.6782
-28.65	-6.3	-12.9		-304.013	-294.043	-225.592		-40.7702	-82.8859	-6.88475		-6.75633	-41.2048	26.3177
-28.65	-6.3	-12.9		-243.171	-189.272	-142.91		-133.469	21.1877	-13.8946		56.6266	-53.7052	-43.9429
-28.65	-6.3	-12.9		-64.0447	-308.873	-69.9828		-34.3303	53.9665	-116.646		3.54934	-23.0114	-4.3616
-28.65	-6.3	-12.9		28.4391	-116.713	-173.039		-98.6907	-41.2178	-31.8861		-69.2378	-29.8791	-57.6918
-28.65	-6.3	-12.9		46.9913	13.8677	-209.398		-62.3234	111.579	-70.3534		17.8205	-13.0966	42.1296
-28.65	-6.3	-12.9		-157.658	16.4494	-202.349		-180.248	-71.8749	-46.2112		44.7119	1.24736	-74.1485
-28.65	-6.3	-12.9		-183.953	-388.587	-193.511		-157.578	-154.863	-8.71848		123.226	-62.6206	-15.3125
-28.65	-6.3	-12.9		-31.7619	-105.737	-229.656		-268.695	-90.9942	-5.46863		29.9593	-55.6892	-65.3487
-28.65	-6.3	-12.9		-234.771	-117.652	-160.837		-138.199	-130.65	-54.6525		-33.5523	-31.2749	-22.6504
-28.65	-6.3	-12.9		-77.6573	-152.524	-214.055		0.642897	-116.039	-22.9529		66.1544	-40.8211	-65.9297
-28.65	-6.3	-12.9		-206.502	-41.8635	-219.427		-86.6323	65.6618	-101.224		19.1432	-36.5813	-43.828
-28.65	-6.3	-12.9		-35.3825	-10.4644	-177.707		72.566	-96.2616	-141.121		31.9161	-41.6166	-70.2736
-28.65	-6.3	-12.9		59.6422	-238.43	-271.946		63.9953	-143.026	-103.269		-72.9049	-14.1797	-53.267
-28.65	-6.3	-12.9		-240.937	-271.332	-135		-100.17	-29.4968	1.12144		-18.2222	-26.6649	-0.516696
-28.65	-6.3	-12.9		-12.1531	-304.473	-365.521		-283.442	-17.5543	-5.89679		-70.8684	-27.699	-76.1346
-28.65	-6.3	-12.9		-198.995	-112.101	-219.924		-266.516	-4.80812	-25.8678		93.8307	-104.935	-33.8594
-28.65	-6.3	-12.9		-155.815	-222.015	-222.728		-50.1226	-60.9188	-31.4237		38.8836	-93.2336	6.65321
-28.65	-6.3	-12.9		-240.611	-169.169	-309.612		-291.053	14.9797	-129.03		7.90453	-10.38	-7.28699
-28.65	-6.3	-214.9		-202.563	-96.0346	-321.589		-183.07	-130.944	19.7972		-2.44518	-12.5131	-92.8033
-28.65	-6.3	-214.9		-102.189	-80.5209	-91.8729		-111.71	-37.5067	-29.4526		43.6613	-9.37181	-52.5467
-714.69	-6.3	-214.9		99.5948	-318.919	-204.704		-153.024	-56.7899	-19.1928		-32.0072	-66.4902	-41.095
-95.72	-6.3	-214.9		31.3802	-4.3252	-232.019		-92.9214	-131.197	-92.8733		52.7247	-60.0174	-59.4196
-95.72	-6.3	-214.9		-352.365	-131.678	-146.944		5.34851	-130.303	-47.9883		-7.63238	-49.8754	-33.6093
-595.57	-6.3	-638.1		-57.9924	-274.816	-145.958		-158.037	-48.2918	-11.8752		33.2464	-66.4497	4.48808
-34.81	-6.3	-638.1		-270.242	127.237	-140.929		1.46177	-139.595	-58.4093		-41.58	21.5141	39.0418
-34.81	-6.3	-89.3		-249.887	-88.6274	-79.8727		-37.2031	-147.6	-38.9886		39.5368	-126.232	42.1153
-34.81	-6.3	-89.3		-67.0408	-311.868	36.7581		-252.711	-211.674	-25.6942		-72.2218	44.4306	15.1819
-34.81	-6.3	-89.3		-40.6143	-89.9136	-230.309		-89.5409	-9.82832	-34.6394		38.6702	20.7597	144.284
-34.81	-6.3	-89.3		-16.0637	-234.474	-305.393		-270.304	-69.0999	-18.2073		49.1535	-74.0683	18.4457
-34.81	-6.3	-89.3		-146.827	-121.651	-276.891		92.5659	-133.418	-94.9114		-14.6355	-33.0338	89.9315
-34.81	-6.3	-89.3		28.8476	-369.502	-156.961		-121.327	26.7132	4.00282		19.561	-30.4899	-29.8098
-34.81	-6.3	-255.2		-86.0248	-11.6656	-173.358		-144.159	-67.9746	-38.6711		31.2794	-17.4204	-92.797
-34.81	-6.3	-319.1		-228.67	-101.606	-347.793		-179.722	-174.093	-14.2632		6.94593	17.7264	6.90282
-34.81	-6.3	-127.6		-29.1466	-45.705	-260.378		-174.908	-72.1214	-91.8523		28.1273	-2.70082	-63.9583
-34.81	-6.3	-127.6		-108.546	-147.739	-287.2		11.5237	11.3766	-146.496		-49.7211	-62.8586	6.20061
-34.81	-6.3	-127.6		37.1899	-127.921	-151.721		-216.551	-100.769	-106.739		21.9159	-57.2967	543.804
-34.81	-6.3	-127.6		-12.2335	-171.758	-339.642		3.39292	-14.2477	-119.932		-26.6182	-33.0187	-49.1907
-23.93	-6.3	-127.6		11.9929	-5.69457	-222.234		-88.3338	-115.988	-26.2777		26.4112	-49.1192	28.1921
-23.93	-6.3	-127.6		-3.17124	-243.835	-219.788		-50.3699	-78.6941	-20.2136		7.15314	0.992994	10.3836
-23.93	-6.3	-127.6		-112.706	-91.47	-207.546		-77.4539	-36.7734	435.075		-42.898	-65.0909	-50.0991
-23.93	-6.3	-127.6		0.904605	-153.286	-234.539		-127.933	-175.773	487.019		1.49717	-14.7272	-34.189
-23.93	-69	-127.6		-148.92	38.8543	-44.0035		-215.161	-162.748	26.6598		-13.5673	-40.6675	-5.7975
-23.93	-69	-113.4		339.541	-78.4598	-111.756		-47.136	-19.5466	-73.2167		66.5433	13.7457	-16.299
-23.93	-69	-113.4		40.1124	-255.829	-301.56		-324.147	-90.8854	-38.3254		-8.47905	-112.694	226.053
-23.93	-69	-113.4		-51.4019	-135.125	-299.637		-177.158	-92.719	-49.8676		-7.17253	-12.2453	-40.7252
-23.93	-69	-113.4		46.5893	-178.495	-320.049		-153.303	-68.3801	-41.1822		-11.5547	-27.3127	-28.8119
-48.29	-69	-113.4		-199.517	-85.8849	-253.771		-117.615	-75.9748	-111.51		16.3015	-43.628	-20.8513
-48.29	-69	-105.1		-53.7325	-102.821	-75.0514		-171.26	-51.3486	-19.9083		266.132	-159.766	-0.637079
-48.29	-69	-105.1		-124.529	-160.969	-377.626		-24.1892	-72.0048	-104.027		263.702	-13.7871	-94.1097
-48.29	-69	-105.1		-364.956	-100.339	-189.3		-16.3523	34.4992	37.9459		-41.8723	-44.0373	-71.5702
-48.29	-69	-105.1		-157.893	-59.5641	-365.334		-36.0752	-259.071	123.388		20.3437	-17.6786	-38.1165
-48.29	-69	-105.1		-87.8537	-141.429	-176.949		-103.317	-137.532	-24.1347		-21.5075	-65.6926	-20.6412
-48.29	-19.6	-105.1		65.4746	-5.61869	503.64		-391.093	-50.7722	-55.8627		73.4772	-19.069	0.52097
-48.29	-19.6	-105.1		-210.573	-253.529	-178.978		-46.7502	-106.811	241.098		13.9828	-9.19066	-6.29622
-48.29	-19.6	-105.1		31.5541	-157.959	-220.446		40.2409	-44.2383	-86.2115		-8.88601	-27.8694	-39.0877
-48.29	-19.6	-105.1		-34.8755	-146.428	-342.154		31.1669	8.89038	-84.1304		29.4899	-44.1771	-37.6844
-48.29	-19.6	-105.1		42.7717	-203.583	-129.204		-60.2039	-90.3497	7.35733		15.1179	-71.1779	14.133
-15.31	-19.6	-61.3		-64.3374	-332.813	30.8739		-150.114	-53.9901	-62.7448		-5.79675	-14.5227	63.1884
-15.31	-19.6	-61.3		-352.98	-221.974	-105.853		-274.932	-134.387	-69.7299		-14.4112	-100.305	-38.0046
-15.31	-98.8	-61.3		-138.639	-239.453	-158.748		-24.8836	-66.8768	-28.5098		20.577	-80.186	-26.6882
-15.31	-98.8	-61.3		-189.7	-164.075	-117.23		13.4873	-144.012	-23.184		48.6272	-93.3811	155.513
-15.31	-98.8	-61.3		-53.4031	-121.515	-317.785		-99.4605	12.1811	-51.7984		26.8088	-16.3454	33.7169
-15.31	-98.8	-61.3		-180.691	-222.618	-339.95		-97.9946	-68.4199	208.377		-7.42427	-22.474	-41.8817
-15.31	-98.8	-61.3		-97.6198	-8.66646	-283.966		-32.7601	-28.5943	-68.9162		3.65068	37.3053	-28.155
-15.31	-98.8	-21.9		-98.426	28.3502	-120.152		-277.051	-72.0029	0.181253		46.7812	-15.5496	-42.7443
-15.31	-98.8	-21.9		-20.8667	15.4697	-364.232		10.9214	-25.6037	-9.47687		-8.57478	-52.6433	-82.7946
-15.31	-98.8	-21.9		-177.459	16.9513	-235.807		-77.5885	-89.0897	-13.6496		29.8728	-22.4033	-5.45174
-15.31	-98.8	-21.9		-40.7546	-24.7716	-314.797		-109.601	-7.84491	-66.6622		-31.1941	-77.9107	7.91024
-15.31	-510.5	-21.9		-98.6147	-176.246	-259.491		-152.28	-220.761	-45.9521		-20.4797	11.9078	-45.3171
-15.31	-19.6	-21.9		68.3877	-290.268	-387.528		-136.074	-198.003	-27.2863		-61.0186	6.10037	-16.4924
-15.31	-19.6	-21.9		10.4133	-218.403	-443.377		-168.059	-120.604	-131.522		39.7052	-74.5617	45.8178
-155.98	-19.6	-21.9		42.7602	-110.119	-119.672		-6.06226	-108.777	-6.02765		-15.9996	-52.59	-30.5783
-155.98	-19.6	-21.9		-140.954	39.1156	-238.732		-40.6557	-85.9585	-141.581		19.7387	-23.6824	55.7629
-155.98	-19.6	-21.9		-0.667952	-12.5683	-255.716		15.3102	-114.621	-136.312		35.8632	-68.2981	-36.7451
-155.98	-19.6	-21.9		-7.9545	99.4554	-260.104		48.9387	-56.22	-40.6363		-114.591	-112.945	-38.8744
-155.98	-19.6	-21.9		-111.708	-75.719	-378.025		-263.885	-63.9868	-16.5389		-28.746	-57.0181	10.9443
-157.07	-19.6	-21.9		44.853	-198.054	593.132		20.7581	-78.448	176.816		34.1816	-54.4914	-46.1566
-157.07	-19.6	-21.9		-216.806	-322.672	-183.052		-50.4567	-152.466	-61.133		35.2885	3.45291	-72.2837
-157.07	-19.6	-21.9		-117.507	-84.2233	-196.5		-233.603	78.6328	-51.5342		-34.8786	6.04269	-26.9486
-157.07	-19.6	-21.9		-240.354	-96.7024	-251.466		15.3461	-122.746	-16.4056		-0.463604	-42.9541	6.78808
-437.56	-118.4	-21.9		-25.2703	-0.257836	-349.743		229.91	-74.3883	-121.487		19.213	137.567	36.9345
-437.56	-118.4	-21.9		-42.8142	-210.375	-178.301		32.7203	-129.782	-50.2137		-86.4467	-57.7689	-13.3911
-437.56	-118.4	-21.9		-78.0556	-123.945	-347.938		5.19971	-145.929	-21.8893		67.1739	-53.8177	-91.6041
-437.56	-118.4	-21.9		46.395	-226.128	-355.348		-6.38655	-4.12867	-70.0181		-92.1091	-117.395	-13.6406
-55.49	-118.4	-21.9		-186.643	-337.585	-253.119		17.725	-119.376	-83.8226		15.7831	-19.6144	-66.6511
-55.49	-118.4	-21.9		-258.118	-329.411	-113.14		13.3045	-134.474	-24.3475		30.098	-58.6573	2.25738
-55.49	-118.4	-21.9		-168.107	-158.159	-172.686		-170.191	40.0634	-0.529708		38.349	6.82194	-30.4681
-55.49	-118.4	-21.9		19.6326	-258.432	-242.412		-40.3273	-35.5192	-81.6212		-34.9648	148.501	-40.4645
-55.49	-118.4	-21.9		12.337	-346.885	-184.298		32.2129	-178.431	-54.2025		-7.9266	-86.3711	-27.4863
-55.49	-118.4	-21.9		-344.784	-179.343	-154.91		-207.978	-19.8918	-19.9618		-110.809	-43.245	1.70083
-55.49	-118.4	-21.9		-227.965	-145.94	-140.423		-90.4203	-51.3185	-56.6339		-5.08372	-103.904	-27.0712
-182.32	-118.4	-21.9		-219.867	-197.199	-250.174		-35.1387	-51.3294	-36.1373		-33.0799	-2.61112	-58.0791
-182.32	-118.4	-21.9		-262.454	-353.849	-219.435		-83.2544	-241.936	-85.8516		-9.5222	14.0494	-96.977
-22.2	-118.4	-21.9		-231.733	-139.917	-131.88		-77.2771	41.4185	-47.0588		-25.9866	-58.0282	-3.52416
-22.2	-118.4	-21.9		-71.9224	-118.826	-270.161		12.5218	-39.3345	-35.8164		6.06268	82.4626	-22.4172
-22.2	-118.4	-21.9		-289.93	-280.13	-84.9161		38.6515	-6.48327	-48.0746		38.7393	29.9026	-49.7823
-22.2	-118.4	-21.9		37.81	-158.392	-328.481		-136.398	-147.196	9.2512		10.1098	-64.3051	-49.211
-22.2	-118.4	-21.9		27.9317	-86.6327	-174.275		-123.494	-21.821	81.9429		46.1184	56.7266	360.151
-22.2	-118.4	-21.9		-35.8202	-86.3461	-192.822		419.505	10.8822	-73.5719		-27.8846	-35.8909	41.1021
-22.2	-118.4	-21.9		-14.0081	-88.6812	-243.6		420.547	110.497	-37.4791		24.9281	-23.2039	24.0452
-935.9	-64.9	-21.9		-18.9893	-181.467	-191.212		-116.319	-113.707	-38.3745		57.4831	13.8131	-7.31033
-54.7	-64.9	-21.9		-76.2956	-103.826	-332.174		35.6052	-178.287	-86.4782		-50.9963	-74.7431	-49.216
-54.7	-64.9	-21.9		-150.553	-94.8416	-316.232		-133.485	-120.444	-75.3371		37.3576	-11.6016	-16.6621
-54.7	-64.9	-21.9		-92.3084	-217.943	-176.046		36.1733	-121.88	22.311		35.1338	-27.6688	10.8737
-54.7	-64.9	-21.9		-130.34	-35.0941	-287.108		-15.9381	-136.68	20.4495		-47.2993	-37.1718	-81.9958
-54.7	-64.9	-21.9		-162.197	-118.855	-255.447		-70.7086	-73.6802	-55.4771		-47.7416	-29.7675	-46.859
-54.7	-64.9	-21.9		-191.283	-137.246	-161.995		59.1317	-185.75	5.63489		71.3925	20.272	-29.0661
-54.7	-64.9	-21.9		-294.679	-141.004	-45.0743		132.783	-135.602	-91.2603		-19.6873	15.1967	19.0269
-54.7	-64.9	-21.9		-19.21	-356.416	-173.74		27.2646	-93.4276	-96.3827		56.7111	-19.796	183.11
-33.58	-64.9	-21.9		-8.99155	-106.857	-299.222		-38.8209	-142.828	-30.7513		33.3609	-40.4205	-23.6125
-33.58	-64.9	-21.9		-25.1978	-111.522	-321.929		29.6911	-5.62663	-80.0578		-30.6049	-83.4303	-21.4489
-33.58	-64.9	-21.9		-158.468	153.816	-369.935		-215.215	-92.4016	-39.4242		-8.08531	-67.6125	-49.3162
-33.58	-64.9	-21.9		-45.8129	135.182	-300.953		-315.905	35.2405	-22.938		40.1375	-19.5018	4.23919
-33.58	-64.9	-21.9		-168.517	-40.6545	-308.302		-118.324	17.079	-24.4971		23.1262	-74.7949	-32.5031
-33.58	-64.9	-21.9		-94.0695	-132.905	-312.174		-102.431	-153.746	-0.335589		1.60555	-4.4147	-30.7426
-33.58	-64.9	-21.9		-119.22	-405.649	-194.108		65.7343	-187.719	-97.7801		2.12558	-76.0958	-5.18863
-33.58	-64.9	-21.9		5.19888	8.2512	-149.463		-229.803	-46.8504	-74.2287		30.3417	-31.2306	-44.1011
-33.58	-364.6	-21.9		-320.277	-113.064	-249.819		-134.622	-138.637	21.568		-28.5	-13.7384	-25.7787
-33.58	-364.6	-21.9		-79.7998	22.053	-275.78		188.628	-32.1185	-66.2211		3.05689	-2.78993	-4.28693
-33.58	-85.1	-21.9		-10.0102	-97.0532	-226.282		183.89	-162.425	-91.485		28.1241	-80.2336	-40.2579
-306.29	-85.1	-21.9		-177.289	24.8005	-263.272		-56.7339	-31.5764	-64.6203		39.2527	6.74716	5.45018
-306.29	-85.1	-21.9		-41.4753	-88.6726	-85.2151		-242.397	-3.71529	-30.7588		7.58986	35.1554	-15.8543
-306.29	-85.1	-21.9		-224.585	14.7882	-218.144		14.693	-1.76584	356.107		-10.9244	-98.5708	7.10317
-148.89	-85.1	-21.9		-312.911	-209.004	-118.143		-124.618	-131.664	-89.2699		27.4401	-37.5325	-14.1259
-148.89	-85.1	-135.1		-75.5674	-215.266	-196.452		-129.235	28.1961	-94.1839		12.8856	-17.2614	35.8587
-148.89	-85.1	-135.1		-121.875	-83.8518	-83.2496		-10.9431	-40.2015	-143.101		20.8138	-2.54966	-31.1407
-364.64	-303.1	-135.1		-81.2817	-89.7317	-226.634		15.3807	-58.7802	103.942		-34.6797	50.0685	30.7933
-364.64	-303.1	-135.1		-131.468	-126.978	-124.738		43.7768	-31.3237	148.425		-12.7564	-42.8519	-47.7202
-58.9	-303.1	-135.1		-65.3174	-104.528	-212.378		-24.1348	-136.899	-31.9669		51.6378	-38.8133	-41.2072
-58.9	-303.1	-6.6		-83.0963	-139.403	-334.519		2.53004	4.9086	-71.5756		-16.2386	-33.0521	-63.4158
-58.9	-303.1	-6.6		-195.712	-76.3561	-260.905		-85.2339	-31.4572	-51.4796		65.42	-23.552	-10.3664
-58.9	-351	-6.6		22.0955	-134.206	-245.309		-33.2889	-126.155	-53.5809		-38.9742	7.39232	-33.3322
-127.62	-351	-6.6		-81.948	-36.8214	-93.056		-152.527	-73.4292	-32.5374		15.8734	-25.5327	762.209
-127.62	-187.2	-6.6		-153.678	-16.6014	-162.769		-417.474	0.274995	-99.8841		-62.4287	-38.8069	18.1799
-29.87	-187.2	-6.6		-153.368	-305.513	-218.239		-210.024	-75.98	-100.784		9.67937	36.4	-11.932
-29.87	-187.2	-6.6		-34.8012	-262.319	-259.95		-54.2369	-22.0986	-59.8898		-36.9975	-35.0208	0.709398
-29.87	-187.2	-6.6		-399.355	-16.8655	-64.2362		-13.1958	-70.2513	-26.9222		14.4877	-72.2241	-42.2438
-29.87	-865.6	-6.6		-219.939	-156.651	-253.272		-288.527	-11.3252	-84.4584		-9.51434	-58.6199	12.8661
-29.87	-865.6	-6.6		-1.61235	-126.227	-225.529		-256.175	-75.9019	-68.5011		19.2082	-8.55269	-43.192
-29.87	-865.6	-6.6		-191.155	-131.41	-187.149		-7.20092	-80.6212	-51.0571		-15.4913	-51.5855	-12.223
-29.87	-865.6	-6.6		-218.119	-274.601	-259.778		40.0786	-67.3729	-26.1087		-54.6803	9.3791	-55.0165
-29.87	-865.6	-6.6		-169.194	-107.986	-395.088		-83.5976	-19.1433	-75.2831		50.7934	7.04586	22.387
-29.87	-865.6	-6.6		7.29885	-56.9774	-225.585		-5.27565	-55.2863	-53.2776		-17.0957	-119.894	-1.55749
-29.87	-865.6	-6.6		-79.2809	-74.4232	-272.682		-229.942	-112.491	-106.198		-1.31587	-74.6912	-27.5041
-29.87	-319.1	-6.6		4.48588	-160.759	-213.09		-48.7863	-157.246	-50.3909		5.40835	-38.1886	-54.776
-29.87	-319.1	-6.6		38.8671	-58.8739	-171.022		14.7088	-117.839	-38.1195		-6.69054	-42.1729	-2.92407
-29.87	-127.6	-6.6		-203.957	-128.557	-193.709		-5.00264	-144.542	-103.724		-38.773	-54.4403	-6.9171
-29.87	-127.6	-6.6		21.6765	-268.787	-239.409		-267.381	-180.909	-64.5818		34.783	-30.9135	-33.1322
-29.87	-85.1	-6.6		-179.678	-151.381	-125.641		-95.7902	-119.761	-101.383		-13.4168	-13.3305	-93.2185
-29.87	-85.1	-6.6		34.6233	-328.881	-213.979		-46.5067	-110.618	-29.4169		55.5707	-59.9667	27.6248
-29.87	-127.6	-6.6		-39.0369	-58.5878	-324.4		-38.6521	-151.442	-61.078		-60.2725	-92.0255	-19.4046
-29.87	-127.6	-5.6		-70.8597	-204.855	-184.349		-37.2728	16.2406	-47.0259		-13.3997	-28.9307	-13.9841
-29.87	-127.6	-5.6		-287.743	-263.205	-321.661		-182.914	-88.2064	-55.8407		-2.89848	7.30156	-25.2175
-29.87	-21.3	-5.6		-113.331	-114.324	-318.982		-6.05544	-92.941	-40.6535		26.9143	-6.66739	-53.1742
-29.87	-21.3	-5.6		-29.9641	-138.974	-220.59		-55.7465	-48.9185	-53.6		-56.3478	-101.554	-74.4926
-29.87	-21.3	-5.6		-24.6207	-215.932	-213.522		-163.38	-169.568	-87.7056		29.5216	-39.7594	-61.8998
-29.87	-21.3	-5.6		-64.3167	-64.6959	-147.004		15.7048	-80.6599	-106.384		19.0379	-26.4951	-44.7771
-29.87	-21.3	-5.6		28.7783	-125.076	-210.104		20.0814	-202.498	26.8018		83.9093	-21.2542	-45.5469
-29.87	-21.3	-5.6		-22.8248	-182.858	-258.645		-150.862	-148.104	163.274		51.718	-62.9924	-22.6958
-29.87	-21.3	-5.6		-223.877	-149.377	-253.305		-81.8035	-112.925	-123.886		35.7278	-24.686	-10.8409
-29.87	-218.8	-5.6		26.1825	-102.183	-178.107		-197.699	-100.399	-142.278		-32.2723	14.3995	-26.4572
-7.81	-218.8	-5.6		-61.1094	-149.465	-166.434		-28.1848	-38.3464	367.363		-41.4511	-44.0852	-30.6756
-7.81	-691.5	-5.6		-98.2122	-268.984	-93.9618		-243.847	126.63	-65.5958		21.0981	72.8759	-81.2003
-7.81	-691.5	-5.6		21.5985	-213.296	-233.346		19.9462	64.894	-25.5578		-16.0403	-31.5657	-18.5878
-7.81	-691.5	-5.6		60.7819	-120.412	302.251		149.341	-55.8896	18.3647		199.037	-11.2371	-41.7043
-7.81	-691.5	-5.6		20.2589	12.6214	-213.223		-89.7438	-68.6484	267.11		-21.8178	-0.934066	331.527
-7.81	-691.5	-5.6		-336.377	-125.065	-296.893		-332.594	-89.0942	-71.1738		4.70898	-26.338	-59.9018
-7.81	-691.5	-5.6		-113.024	34.1904	-158.735		-40.8064	11.2323	-129.533		-111.394	-75.9501	10.5697
-7.81	-691.5	-5.6		-147.65	-156.357	-213.163		-271.086	-47.1255	-168.679		15.3681	31.2342	603.516
-7.81	-691.5	-5.6		129.893	-168.63	-169.153		-22.0609	-51.3522	-39.7542		17.2992	-22.2202	-8.74523
-7.81	-691.5	-5.6		-6.41512	63.8215	-169.088		-57.5063	-83.0209	-25.9514		22.9586	21.784	-39.0979
-7.81	-691.5	-5.6		-92.0384	-61.1274	-254.672		-40.4762	-68.6945	-31.3527		12.7724	-14.3745	-58.9433
-7.81	-691.5	-5.6		-272.233	-198.277	-250		30.46	-39.2468	-101.924		-14.9203	-126.359	-24.8226
-7.81	-691.5	-5.6		71.876	-117.528	-258.274		-160.754	-50.4505	-76.7089		31.3478	-26.1984	-36.2376
-7.81	-691.5	-5.6		-104.511	-97.6399	-294.542		-45.1555	31.6387	-63.0263		20.6522	60.0157	-48.3886
-7.81	-691.5	-5.6		-37.8898	-204.852	-194.721		-136.396	-200.615	-39.1325		46.9922	-119.386	-38.3229
-7.81	-691.5	-5.6		-59.0829	-231.507	-289.257		-82.3493	-96.0842	-102.901		41.6031	-0.490498	-62.1467
-7.81	-691.5	-5.6		26.2428	-152.456	-329.281		83.9216	-87.8711	-62.3663		-18.0659	-75.478	-41.2622
-7.81	-119.1	-5.6		-68.6496	-136.184	-127.834		13.3949	-155.195	-133.535		-7.50058	14.3653	52.5989
-7.81	-119.1	-5.6		-36.7207	-88.6667	-196.228		-136.422	-129.548	-77.7323		33.456	-40.1249	668.468
-7.81	-119.1	-5.6		-224.229	-60.3051	-238.151		-38.0176	-27.7833	-63.6641		-39.8604	-92.7983	180.137
-7.81	-119.1	-5.6		-186.129	-104.597	-302.224		-1.75739	-151.314	-12.2533		26.9226	-40.7402	-36.6058
-7.81	-119.1	-5.6		-141.95	-21.874	-179.442		-124.436	-63.0182	-21.8255		9.02896	-44.5414	-34.8778
-7.81	-119.1	-5.6		-260.384	-85.665	-241.286		-254.512	-85.5275	-139.952		-32.8741	-3.23165	329.618
-7.81	-119.1	-5.6		-387.815	-83.1977	-359.726		-7.4291	-59.6871	-32.2808		57.7308	-45.6222	-18.8635
-7.81	-119.1	-5.6		-505.482	-72.3156	-212.107		-253.244	-103	-169.763		19.1821	-42.6587	42.7312
-7.81	-119.1	-5.6		-55.1135	-120.603	-171.246		19.9141	-129.817	-75.2491		24.429	-51.02	56.175
-7.81	-510.5	-5.6		-100.634	-50.3032	-211.138		-265.575	-125.104	-59.8003		-49.0875	-46.8634	19.5604
-7.81	-510.5	-5.6		-2.85027	-58.9606	-139.529		-444.229	-31.0905	-73.2921		-8.44676	-39.202	-72.4534
-9.45	-510.5	-5.6		-26.0224	-79.1277	428.743		35.2036	-54.0189	-109.684		-17.0418	-18.9242	-48.3571
-9.45	-20.4	-71.6		51.9129	-280.158	-153.302		4.73747	-117.087	17.8115		-35.0545	-47.2637	-23.961
-9.45	-20.4	-71.6		-154.541	-124.146	-227.697		361.785	-7.78333	58.4729		5.33697	-34.4073	-21.5249
-9.45	-20.4	-71.6		-140.637	-255.134	-160.663		143.056	-59.8314	2.53413		-45.1422	8.74926	15.2315
-9.45	-20.4	-71.6		-115.428	-166.521	-107.385		-165.03	-70.7215	212.288		17.9882	-2.6708	99.1997
-9.45	-20.4	-71.6		-174.829	-97.2639	-146.997		-236.013	-53.0104	-52.5243		48.3994	-14.349	93.0153
-9.45	-20.4	-71.6		-133.921	-185.972	-208.631		-37.2417	17.3298	-99.6022		-43.3379	-61.9767	-93.2623
-9.45	-20.4	-71.6		-48.4066	-70.0175	-273.632		28.7062	-45.2659	-45.661		22.3796	-14.2572	-60.4003
-9.45	-446.7	-71.6		-218.508	-193.149	-165.64		-191.093	-54.5156	174.373		41.8704	-20.0627	-26.8225
-9.45	-446.7	-71.6		-27.0623	-224.273	-213.418		-45.3487	-22.7062	-51.7379		25.0739	-85.9167	-57.9532
-9.45	-136.1	-71.6		-210.158	-153.322	-238.227		8.70443	-72.2126	-141.506		-13.5177	-123.451	-37.222
-9.45	-136.1	-71.6		12.9868	-323.461	-185.429		85.082	-147.118	-4.25758		-47.3998	18.8445	-22.2092
-9.45	-136.1	-71.6		-289.21	-61.8276	-173.066		48.946	-68.994	-198.032		7.50522	16.177	-37.8226
-9.45	-136.1	-71.6		-52.8795	-19.015	-106.575		-151.413	-64.2047	-94.674		-4.85285	-115.122	-46.3189
-9.45	-136.1	-71.6		-126.809	-80.9437	-154.457		17.4508	-93.9776	-26.9357		-12.0132	-25.3873	-120.315
-86.89	-136.1	-71.6		-152.667	-122.448	-242.822		13.6872	-99.1218	-74.047		24.4447	-19.9674	-72.4579
-86.89	-136.1	-71.6		-361.949	-185.496	-146.756		-189.348	-134.083	-66.8547		-26.0015	15.0529	17.17
-86.89	-136.1	-71.6		-49.0061	-87.9778	-223.901		-122.443	-27.9223	-65.1519		73.7181	0.483353	-69.4849
-86.89	-136.1	-71.6		-10.5498	-187.981	-250.96		-149.573	-214.698	-80.6725		39.1538	-28.3798	-21.8256
-86.89	-72.3	-71.6		-158.884	-64.0314	-390.334		-224.399	-88.1345	-59.6956		13.0058	56.9442	24.0063
-86.89	-72.3	-71.6		-124.298	-282.164	-216.899		-105.713	-44.9117	-64.4975		-9.62333	20.9621	-40.3425
-86.89	-72.3	-71.6		-53.1559	-226.574	-198.013		-1.92451	-92.2647	0.133896		55.1805	-72.9659	39.6955
-86.89	-72.3	-71.6		-36.3998	-141.51	-278.89		-144.404	-13.4179	-51.7708		-29.123	122.147	-69.81
-86.89	-72.3	-71.6		-225.201	-136.025	-344.871		-134.942	-91.6844	-72.0593		-18.8658	-171.919	288.645
-86.89	-72.3	-735.7		-137.412	-244.627	-237.853		74.9706	-2.67052	-141.423		34.9071	9.2806	3.6686
-86.89	-72.3	-735.7		-180.499	-262.746	-414.574		-12.2723	-3.42988	-33.7359		7.84687	-60.7831	-12.9092
-86.89	-72.3	-735.7		-199.443	-390.114	-150.303		-61.5509	-12.5245	-19.2255		13.9775	-119.604	-40.6892
-86.89	-72.3	-735.7		40.971	-110.192	-118.28		49.5055	-51.4484	-27.8783		36.221	6.98716	-48.4681
-11.1	-72.3	-735.7		64.7385	-102.063	-227.584		78.3258	-85.355	8.56162		-16.3282	-62.1403	22.6965
-11.1	-72.3	-1191.1		-103.174	-216.684	-287.118		-60.307	5.80845	-74.4934		-27.1832	117.836	101.631
-11.1	-72.3	-619.9		-300.422	-103.981	-334.216		-104.093	-138.901	-84.57		1.13621	-49.4297	-1.93539
-11.1	-72.3	-619.9		-240.49	-43.2929	-91.9738		-34.1293	-6.68232	-122.639		-10.5192	-14.8492	-30.4995
-11.1	-72.3	-1063.5		-89.0641	-198.418	-93.2568		53.6826	-30.749	-106.343		-49.999	-49.8793	-43.7583
-11.1	-72.3	-1063.5		-78.8811	-250.62	-212.257		70.9635	84.9775	-86.6133		-93.928	-112.863	261.03
-11.1	-72.3	-893.4		-169.393	-85.6947	-309.818		-145.145	88.8186	-15.3097		39.4443	-77.7082	-2.15162
-11.1	-72.3	-893.4		-269.527	-227.64	251.682		-3.77188	-15.9214	-27.1561		34.1044	-52.5154	-50.667
-11.1	-170.2	-159.5		-133.712	-179.676	-233.192		-274.249	-51.1791	-119.037		-26.8138	-92.5916	-38.9018
-11.1	-170.2	-159.5		-220.633	-103.771	-267.096		22.2882	-48.4285	-41.5062		-12.2777	-82.0735	-54.3438
-11.1	-170.2	-159.5		-94.4363	-162.202	-131.444		-267.147	-230.725	-36.2821		-1.46255	27.769	-68.457
-11.1	-170.2	-159.5		-75.0686	-165.446	-170.187		-117.009	-249.127	-14.4171		-0.845525	-21.3387	-53.6674
-11.1	-53.7	-159.5		77.8229	-157.103	-273.872		33.8077	-64.1318	-94.55		16.7197	10.0753	-18.2708
-11.1	-53.7	-978.4		12.6605	-165.249	-160.074		-33.0388	-26.1505	13.7064		11.0094	-34.1627	-60.762
-11.1	-53.7	-978.4		-141.483	-146.863	-309.718		-149.023	-122.239	209.536		28.9821	-61.1925	-1.23931
-11.1	-53.7	-324.9		-306.912	-240.978	-217.368		-25.2144	8.06668	-104.763		32.3948	-43.0764	-59.3536
-11.1	-53.7	-324.9		-89.885	-74.514	-84.5729		-85.2548	-65.17	-52.6308		9.98678	-85.2073	-68.5435
-11.1	-397	-324.9		-90.9231	-182.462	-318.029		-194.844	-87.2948	-61.7887		22.9404	30.4867	-54.4917
-11.1	-397	-16.2		-173.463	-263.845	-237.588		112.713	-114.184	-64.7496		-40.4869	19.2355	15.1554
-11.1	-397	-16.2		-112.42	-258.994	-98.3865		-155.806	-47.1391	-55.8635		30.3394	-2.7145	-31.8927
-175.48	-397	-16.2		-209.964	-54.5067	-368.133		-34.9545	-97.6347	-89.336		43.0209	-25.1375	16.6251
-175.48	-397	-16.2		-37.8727	-106.327	-193.167		-179.791	-71.9133	164.641		25.1596	-55.4974	302.187
-175.48	-201.5	-16.2		-209.1	-144.391	-124.024		36.0183	-50.195	-91.6932		19.2356	-26.008	69.4352
-175.48	-201.5	-16.2		-231.21	-82.8478	-246.93		-50.2147	-144.117	607.97		54.9592	-39.0826	-1.22289
-175.48	-201.5	-16.2		-44.7189	-110.978	161.917		-9.16487	-171.301	6.05855		-36.7926	-47.4761	-69.9926
-55.49	-201.5	-16.2		-177.939	-253.344	-103.826		-10.3919	-87.2274	-128.118		17.2749	-31.0087	-28.9232
-55.49	-201.5	-16.2		-25.0058	-99.335	-302.746		-85.0376	-99.847	-27.9185		-29.0559	-59.1312	-49.7453
-55.49	-201.5	-16.2		-31.1254	-175.892	-200.386		-83.6741	-60.4166	-142.284		13.114	-50.1288	24.591
-55.49	-201.5	-16.2		50.8094	-313.212	-291.85		-2.25453	-21.3483	-31.3166		-5.12581	-67.2619	-68.2069
-55.49	-201.5	-16.2		-162.875	-46.4252	-171.214		-106.578	-68.8249	-34.7083		-68.3646	-96.9596	-8.9751
-55.49	-201.5	-16.2		-150.349	-153.726	-346.29		-13.6158	-10.2239	-74.5951		20.5422	-84.9555	-40.5636
-55.49	-201.5	-16.2		49.4375	-202.001	-207.731		-230.496	-126.862	-61.0604		-14.388	-63.1651	-9.95922
-93.59	-201.5	-16.2		-190.753	-77.0571	-168.48		-166.495	-74.1966	-34.9718		-5.6571	-12.302	-55.9457
-93.59	-79.8	-16.2		44.5653	-232.746	-309.589		-153.967	-157.696	-54.9162		-34.6311	-51.304	-56.6585
-93.59	-79.8	-16.2		63.7351	-162.869	-305.27		-9.91911	-94.1986	-56.6858		53.4463	-30.717	-11.0924
-93.59	-79.8	-16.2		-0.258344	-316.937	30.22		-57.9323	-178.747	-64.6149		16.4902	-51.289	6.40727
-93.59	-79.8	-16.2		61.0167	-36.5438	-202.317		-4.4604	-190.451	-40.1477		-30.7937	-44.9894	-76.6928
-93.59	-79.8	-16.2		-57.0139	-102.711	-203.973		-32.2517	-214.437	-46.557		35.9679	-38.8277	-41.9616
-93.59	-79.8	-16.2		-119.518	-99.8033	-277.568		-37.7906	-45.0216	152.216		-26.2412	12.1403	80.7012
-93.59	-79.8	-16.2		13.5871	-235.428	-266.672		-282.529	-36.4138	-42.2564		10.1797	44.7897	527.31
-93.59	-79.8	-16.2		27.7808	-185.836	-338.698		-21.8625	-45.7674	-109.431		-15.0204	-99.7152	-69.8707
-19.63	-79.8	-16.2		-19.0917	-141.115	-275.923		99.2818	17.2905	1.57789		-7.10655	-29.085	-20.8239
-19.63	-115.3	-16.2		-181.555	-58.0875	-247.388		170.777	-10.7569	-46.4861		25.5976	-75.5808	83.6034
-19.63	-115.3	-16.2		42.9235	-27.0435	-234.983		160.685	-67.1373	-57.1427		-15.7505	-112.854	-8.96727
-19.63	-115.3	-16.2		23.368	-217.864	-330.323		16.974	-210.021	-70.9581		-40.9084	-19.857	-19.88
-19.63	-115.3	-16.2		-76.6089	-317.038	-117.73		-19.7896	24.4892	-32.3316		32.2159	32.2109	0.0241093
-19.63	-115.3	-16.2		-23.0647	-71.5414	-299.301		-140.274	-63.5686	-62.2183		29.9184	-39.9992	-32.8802
-19.63	-115.3	-16.2		-96.2099	-251.941	-129.777		-223.538	28.9895	39.4002		-25.3379	43.0728	-18.1395
-19.63	-115.3	-16.2		-223.645	-63.1509	-197.857		-15.8768	-65.632	-32.4587		-8.45246	8.46031	-4.58965
-19.63	-115.3	-16.2		2.3046	16.5569	-45.2536		25.7142	-161.522	-32.2524		73.2276	30.5055	-10.8607
-19.63	-115.3	-16.2		-118.524	-157.745	-298.763		10.291	-22.7346	1.25583		22.5607	-45.5553	-5.35594
-19.63	-516.2	-16.2		-221.376	-100.054	-292.14		-91.6043	-132.138	29.7302		20.7325	26.0429	-69.3132
-19.63	-516.2	-16.2		-138.232	-159.976	-120.164		-104.967	-96.8619	-21.0026		-34.8866	-42.136	-25.0223
-19.63	-516.2	-16.2		-44.9444	-113.067	-156.517		-222.809	-283.627	-53.9579		-0.15962	-40.2905	285.831
-19.63	-516.2	-16.2		-190.238	-278.202	-212.798		-135.301	108.711	-6.70553		-24.8716	42.9435	119.296
-19.63	-516.2	-16.2		-382.533	-23.3425	-326.035		-145.213	-118.182	-21.2795		39.3884	-59.8625	2.70201
-52.21	-516.2	-16.2		-161.368	-115.507	-154.969		-41.4794	-50.1953	-78.7116		38.7939	-20.765	19.1854
-52.21	-516.2	-16.2		-192.685	-32.6914	-187.917		-64.5487	-19.2977	-56.6324		176.525	-30.6549	-32.8214
-52.21	-516.2	-16.2		32.3797	-115.654	-273.162		31.2981	-45.0187	-9.37943		-25.3773	-16.4697	-64.1811
-52.21	-516.2	-16.2		-129.727	-220.235	-284.913		-80.1088	-104.496	-29.8221		-44.9171	-38.1959	-117.774
-52.21	-516.2	-16.2		-102.119	39.9929	-236.502		-121.543	-80.598	-9.01703		-40.2288	-3.6303	-70.7002
-52.21	-516.2	-16.2		15.8401	-222.565	-192.848		-2.02961	-35.6975	-122.493		7.68582	-30.4908	-81.2915
-52.21	-516.2	-16.2		-10.5166	-135.728	-221.375		120.97	-65.2327	-41.6615		-3.31167	8.2665	-91.2943
-52.21	-516.2	-37.3		67.7203	-227.224	-171.798		-232.553	-101.446	-102.262		41.1394	-45.2928	17.6504
-52.21	-516.2	-37.3		-113.073	-300.868	-176.386		39.6925	-71.4825	-61.5921		6.94203	-29.7602	-27.4735
-52.21	-516.2	-37.3		-57.0526	-118.839	-236.249		-4.16763	-229.816	-55.306		-4.07293	9.60098	-7.22396
-52.21	-516.2	-37.3		-79.9007	2.99434	-80.9915		33.2308	-181.199	-45.5168		-10.1457	-85.2854	-54.9626
-52.21	-516.2	-37.3		-158.177	-48.0404	-66.6783		-55.676	-131.607	-4.41614		7.29017	-73.0294	-85.508
-52.21	-516.2	-37.3		-67.3923	-166.372	-387.131		-231.925	-188.915	-50.7693		34.8543	-10.5779	-55.2263
-25.16	-516.2	-37.3		42.7612	-109.373	-313.65		-167.551	-104.397	-60.5404		26.7466	-12.9244	-58.0017
-25.16	-516.2	-37.3		-66.2847	-262.763	-183.414		-18.2271	-155.907	-20.6606		35.0559	-35.8644	-48.6356
-25.16	-516.2	-37.3		-9.94043	-10.3285	-30.5684		-231.036	-112.583	170.791		-0.678161	-52.7942	235.693
-25.16	-516.2	-37.3		-129.968	-109.638	231.81		-176.977	-114.103	-41.2516		16.0184	-2.28878	-29.972
-25.16	-516.2	-37.3		-7.66424	-178.723	-225.157		-12.9173	-157.229	-89.3131		29.9687	24.4657	-90.0631
-25.16	-516.2	-37.3		-153.382	-290.048	-241.594		17.6276	-105.462	-78.1312		43.7677	-65.1248	-76.5111
-25.16	-516.2	-37.3		-86.6366	-217.84	-333.625		-183.873	-102.051	15.9838		-36.5684	-50.7031	-5.88158
-25.16	-516.2	-37.3		-145.396	-172.056	-273.176		-152.905	-31.5047	-56.6377		10.3074	-27.978	-31.2271
-25.16	-255.2	-37.3		-69.0284	-147.353	-240.088		-293.486	-197.463	-60.2684		15.7404	1.80252	15.7131
-25.16	-255.2	-37.3		-229.789	-73.2022	-313.726		-118.237	-108.161	-57.4127		169.599	-70.2512	28.4393
-25.16	-255.2	-37.3		-16.3088	-375.784	-147.445		-220.086	32.4155	96.325		-75.8768	81.7013	5.53393
-25.16	-527.5	-37.3		-81.6112	-97.7954	-300.978		-132.451	-156.912	-93.2837		-19.5022	18.7476	-35.4087
-25.16	-527.5	-37.3		-107.876	-341.956	-212.434		-371.193	-109.828	-22.0585		30.6073	2.79639	-13.2487
-25.16	-527.5	-37.3		35.8297	-403.779	-451.058		-251.842	-158.51	-106.677		25.5247	-46.0734	-34.9083
-25.16	-527.5	-37.3		-18.8226	-13.5618	-208.862		-11.0984	-86.0736	-91.3757		-33.897	-17.882	-55.2357
-25.16	-255.2	-37.3		-20.8939	-110.009	-292.204		-202.513	-100.573	-44.6945		17.2848	-49.8849	-33.8144
-25.16	-255.2	-37.3		-377.988	-46.2237	-313.599		-95.7368	-58.2951	-123.891		3.82019	-66.3925	-59.9258
-25.16	-255.2	-37.3		4.55538	-89.6694	-154.822		-285.222	-132.847	-72.5105		62.8281	-32.8507	-10.0869
-25.16	-255.2	-37.3		-62.5198	42.0083	-84.6102		-19.1225	-109.007	-129.141		-94.1238	-11.48	-66.206
-25.16	-255.2	-510.5		-144.311	-382.89	-139.479		-169.972	-123.724	10.7178		49.0507	-90.4177	-61.5389
-119.11	-255.2	-425.4		-160.053	-74.6983	-127.334		-150.12	-105.108	-20.3728		33.6427	-1.49841	-20.4931
-119.11	-255.2	-425.4		26.8662	-97.4832	-301.548		-267.829	-86.0984	-128.84		139.681	-24.7996	-25.2168
-119.11	-354.5	-425.4		158.915	63.665	-249.208		-115.575	-11.2236	-48.7045		48.2019	-18.745	174.599
-119.11	-354.5	-333.8		-134.054	-155.101	-240.314		-30.7064	-192.501	-84.4676		-33.8305	-20.2761	-30.2862
-701.92	-354.5	-333.8		-303.018	-85.8637	-371.789		36.2122	20.55	-30.7874		-6.47712	-69.5938	-17.9122
-170.16	-354.5	-333.8		-176.226	-94.1285	-194.375		-276.2	-183.952	-14.0457		-17.4139	-30.6405	-23.7438
-170.16	-354.5	-333.8		-223.407	268.918	-277.075		-106.416	-41.5899	-97.5029		47.5763	-104.539	479.592
-255.24	-255.2	-189.8		-48.3098	-215.039	-18.7771		-10.6888	-46.1103	-50.0294		14.7036	28.5737	99.5042
-221.95	-255.2	-189.8		-374.272	-101.653	-224.044		6.51611	-142.644	-101.957		6.45488	-42.3085	23.2127
-221.95	-255.2	-189.8		-8.25805	-342.958	-285.997		-116.769	-8.90337	-68.3897		82.6081	3.80511	-22.7303
-221.95	-638.1	-189.8		7.34352	-124.844	-62.5251		-108.382	-66.1896	12.3818		28.8122	18.6134	-8.78647
-221.95	-474	-189.8		13.9774	-256.906	-300.651		44.8681	-69.483	-79.358		-13.3663	-42.6724	-46.9381
-221.95	-474	-189.8		-112.767	-184.956	-99.0065		-153.174	-73.8153	-59.4755		-50.9745	89.5035	-143.137
-221.95	-85.1	-189.8		-22.5513	-85.4781	-176.871		-19.0869	-55.832	-73.535		65.1568	-96.0184	-31.6079
-221.95	-85.1	-189.8		-104.141	-54.7717	-189.702		-42.8911	-46.4838	-81.4422		22.3079	-13.5914	-20.4544
-25.52	-85.1	-189.8		-223.375	-186.034	-284.11		-324.697	12.4582	-52.063		11.9556	1.89104	-122.985
-25.52	-85.1	-189.8		-259.27	-381.188	-318.461		-93.1923	-76.1092	-134.011		26.296	18.7562	-29.9986
-25.52	-85.1	-189.8		-73.3661	-119.34	-255.519		42.5585	-50.4449	-0.717244		25.2713	48.7044	23.7348
-25.52	-85.1	-14.6		-115.879	43.5304	-366.406		21.8845	-125.877	0.763168		-0.253991	-37.346	-53.6169
-25.52	-85.1	-14.6		148.601	-208.489	-160.277		-311.876	7.49016	-37.74		37.2697	-70.2731	-22.8429
-25.52	-19.6	-14.6		24.1307	-319.206	-176.651		-249.709	18.8811	3.69795		13.1766	-50.6145	-52.6912
-25.52	-19.6	-14.6		12.9327	-273.735	-112.003		286.46	-303.009	146.749		66.1626	-91.0838	-22.224
-25.52	-19.6	-14.6		-21.0752	-85.3317	-245.297		-95.6379	-103.065	-58.8531		-55.9875	-15.0496	-63.1389
-25.52	-19.6	-14.6		-62.1374	-35.437	-420.558		-169.338	-49.1468	-67.6071		52.5727	-44.7609	-27.3999
-116.02	-19.6	-14.6		-404.139	-60.2536	-203.236		-244.373	-43.3631	-132.038		13.0261	-34.3847	-41.3729
-116.02	-19.6	-14.6		-210.996	-164.824	-325.13		13.3868	-85.2309	-16.9542		50.1622	-77.7878	13.8341
-116.02	-19.6	-14.6		-402.447	-75.7186	-198.321		-270.359	-146.806	-17.0949		-1.15435	3.60373	-9.11287
-401.1	-85.1	-14.6		122.18	-4.31669	-106.071		-53.7025	-132.292	-20.6786		-29.415	-38.2756	-6.2086
-401.1	-85.1	-306.3		-211.198	-134.599	-103.927		19.8005	-263.772	-65.3517		-24.5386	33.0409	-30.9392
-340.33	-85.1	-306.3		-78.6291	-200.033	172.864		43.2794	-131.913	-49.9984		127.74	-43.6291	-68.8989
-340.33	-12.8	-306.3		-103.869	39.9276	-151.948		-17.4947	-59.2823	10.3978		-57.1771	12.3271	-49.7452
-340.33	-12.8	-22.5		47.8349	-141.794	-183.7		-141.093	-66.4594	-42.1063		45.3076	-41.5041	-111.338
-340.33	-12.8	-22.5		15.2998	-149.743	-113.876		-77.1753	60.8175	-92.7755		26.0496	-81.5702	-85.8667
-340.33	-12.8	-22.5		-149.645	-117.651	-125.067		13.284	-221.411	-71.5898		-9.7891	-97.2709	-74.7764
-340.33	-12.8	-22.5		-126.132	-104.776	-366.335		1.18398	-85.4655	-61.9151		-63.2309	-70.3619	-25.8404
-574.3	-12.8	-22.5		-68.0303	-69.5167	-287.333		-194.357	-11.4652	-72.2975		11.0543	-48.2106	-14.8017
-574.3	-12.8	-22.5		-160.684	-154.739	-135.843		-20.8391	-87.5877	-85.3649		6.91066	-67.4932	-15.1282
-574.3	-12.8	-22.5		-141.325	-252.478	-109.585		-72.3165	-218.328	-76.3134		-5.18404	-69.2253	-62.9311
-574.3	-12.8	-22.5		-177.537	-224.23	-146.368		-192.18	-86.3776	-72.6231		-131.098	-10.8259	-33.2776
-574.3	-12.8	-22.5		-5.73213	-41.3751	-284.665		-154.308	-80.054	-49.4247		21.213	-44.2264	10.7016
-9.45	-12.8	-22.5		-67.4609	-267.69	-276.983		-129.156	-137.647	-122.627		35.5687	-38.6248	236.274
-9.45	-153.1	-30		-29.4808	-84.5043	-265.377		-123.695	-103.48	-71.8564		25.9424	-12.8222	-28.0454
-9.45	-153.1	-30		-191.424	-301.731	-86.2398		-271.429	-161.987	-27.3687		34.8038	177.895	192.763
-9.45	-153.1	-30		-323.626	-7.80394	-94.4183		15.8472	-0.701481	-115.623		56.2672	-5.37032	6.51406
-9.45	-79.8	-30		-17.5987	26.4714	-205.877		-24.3805	-131.299	-82.9268		-5.16443	-62.3426	36.71
-9.45	-79.8	-30		-64.0161	-104.504	-74.7517		-146.622	-130.542	-143.466		1.83511	-8.24779	10.9842
-9.45	-79.8	-148.9		-70.2088	-215.636	-328.205		-165.196	-56.1721	-148.176		-22.3192	-20.6862	-2.83309
-9.45	-79.8	-148.9		32.1212	-29.7266	-161.169		50.8383	-66.5339	-55.14		19.2723	-60.2464	-25.4814
-9.45	-79.8	-148.9		0.733279	-133.604	-83.3731		-48.3109	10.2963	-104.367		-2.28227	-25.3853	91.1404
-9.45	-26.9	-148.9		-267.021	-346.987	-225.598		-208.826	-179.727	-77.6673		-11.2657	-0.0228889	-104.814
-9.45	-26.9	-148.9		35.4263	-326.588	-128.65		-64.0303	-71.3837	-64.317		52.934	-1.38599	-15.172
-9.45	-26.9	-148.9		-123.16	-323.567	-153.31		-222.824	-127.271	-81.6273		29.912	-25.8666	-66.7993
-9.45	-26.9	-148.9		-216.693	-86.3675	-75.1091		-114.733	-206.614	-125.437		-51.67	-32.1084	24.5521
-9.45	-26.9	-38.3		-293.942	-119.53	-164.381		42.6855	-23.9241	-99.3296		3.22481	-35.4582	-24.5374
-9.45	-382.9	-38.3		-134.277	-123.028	-308.24		-6.52787	1.24959	-73.1566		-12.0263	-20.6701	-5.52433
-44.57	-382.9	-38.3		-64.8894	-55.9451	-119.179		57.4479	-40.8846	-62.6542		21.3484	-98.5727	-60.1711
-44.57	-816.8	-38.3		-445.76	-231.854	-268.046		11.2444	-52.4161	-74.5785		55.4371	-36.1676	23.5585
-44.57	-816.8	-38.3		-131.895	-266.277	-203.111		-115.133	-24.0429	-48.1894		197.376	-18.489	-29.7429
-44.57	-816.8	-38.3		-57.4059	-320.243	-240.847		-79.1893	-29.5321	-182.051		12.6684	-42.0957	-64.0384
-44.57	-816.8	-127.6		47.1044	-64.6364	-277.017		-327.222	-41.8239	-51.1099		0.341539	-25.1948	1.31285
-44.57	-816.8	-127.6		-84.8922	-170.487	-200.845		85.3798	-117.754	144.32		-23.0932	-95.2632	-23.2985
-44.57	-816.8	-127.6		-131.751	-173.813	-249.283		-34.0687	-39.9277	-97.322		-10.8996	-17.2844	-100.946
-44.57	-239.8	-127.6		-229.58	-282.309	-232.084		-163.777	-197.847	-6.5844		-17.7068	-40.5126	-32.4262
-44.57	-239.8	-127.6		-13.7198	-44.8882	-278.293		-91.6016	-106.261	7.87669		77.3886	27.9697	-0.817598
-44.57	-239.8	-290.1		-44.4556	-260.363	-257.654		-40.3216	48.6757	-45.0313		0.385053	39.5857	46.1842
-44.57	-239.8	-290.1		-302.238	54.1929	-257.614		-3.91328	-5.79111	-1.02411		-10.3515	-7.67172	33.1482
-44.57	-239.8	-290.1		-112.865	-64.7845	-157.276		-318.133	-100.948	-57.2773		31.8206	-5.50048	-37.1493
-44.57	-239.8	-290.1		-188.053	-295.117	-126.019		-11.8944	-164.77	-92.0781		-37.6338	5.23517	-100.321
-44.57	-239.8	-290.1		-78.1674	-124.395	-210.504		-85.3793	-109.64	-86.8206		10.1573	-86.5155	-50.8698
-44.57	-239.8	-290.1		28.106	-168.822	-164.216		178.131	36.6283	-10.9109		-11.0092	-52.7305	5.02614
-44.57	-239.8	-1217.3		-111.107	-323.914	-210.24		-1.76839	-74.3325	-20.7545		10.8326	13.2047	2.38434
-44.57	-465.4	-1217.3		11.9104	-153.312	-216.474		-20.2372	-2.67982	-95.8556		46.8903	-40.5411	-43.1995
-44.57	-465.4	-1217.3		-55.2208	-171.496	-218.208		54.7697	-43.3588	-27.0958		33.8112	-13.5725	-76.514
-127.62	-465.4	-1217.3		-34.8449	-202.638	-265.974		-66.1706	-184.099	-105.686		31.8407	-15.6337	-9.65063
-127.62	-465.4	-1109		-102.201	-170.76	-45.1861		-62.1262	8.00001	-9.10537		-52.087	33.9759	-61.2239
-127.62	-465.4	-1109		25.7982	-195.792	-262.782		-41.05	-74.0589	2.54732		-28.4076	-86.0499	60.361
-127.62	-266.8	-1109		15.4449	-303.389	-185.211		-2.23121	-145.568	-57.6543		0.294132	-30.5177	-51.855
-127.62	-266.8	-1109		-231.234	-56.8892	-132.551		-302.131	-131.294	-16.6182		-22.7135	-91.2037	-2.31593
-127.62	-266.8	-1109		54.2371	-204.815	-198.568		-39.0843	22.5812	30.7165		-7.67017	11.3323	260.064
-335.85	-266.8	-1109		-220.766	-214.67	-386.659		-29.1612	-169.771	-164.997		-1.8148	-76.972	-47.0683
-335.85	-266.8	-1109		-160.587	-187.051	-263.433		-262.264	-90.0257	-10.6559		-8.17542	2.08236	-5.99685
-335.85	-266.8	-1109		-218.58	-159.459	-129.107		24.7525	-41.0596	-87.6432		48.3156	9.78107	-5.39373
-335.85	-68.1	-290.1		38.8843	-137.983	-310.245		-32.8427	-57.0557	-69.4644		-44.2009	-45.128	-71.4413
-335.85	-68.1	-290.1		26.5141	-166.358	-216.685		-194.095	-40.367	-42.9755		-36.6181	-50.1683	-16.8507
-212.7	-68.1	-290.1		50.5941	-73.027	-309.937		70.3931	-186.001	-135.317		-45.6614	171.629	67.283
-212.7	-68.1	-290.1		-118.992	-165.792	-339.067		-234.753	-15.0192	-103.407		2.69386	-20.3965	-12.15
-212.7	-243.1	-290.1		-268.333	-190.458	-268.351		-177.572	-75.4612	-114.594		28.9006	-64.4937	-25.8591
-212.7	-243.1	-290.1		-345.064	-208.195	-210.079		-203.876	-101.862	-44.5488		13.8029	-23.1165	-67.2299
-212.7	-243.1	-37.4		-50.2058	-230.714	-268.226		-68.7363	-98.8161	-60.4908		29.5723	-84.7076	-18.44
-401.1	-243.1	-37.4		-138.426	-166.606	-122.971		-197.936	-78.7781	143.5		-0.469985	23.1384	9.90268
-401.1	-243.1	-37.4		-167.791	-41.9867	-73.6117		-43.5773	-84.6231	-134.402		-31.1987	-51.952	98.0862
-401.1	-243.1	-37.4		-234.361	-286.917	-148.175		-108.518	-45.7692	346.921		-5.37088	-41.5721	4.6971
-401.1	-243.1	-37.4		-100.102	-162.904	-281.913		-114.263	-2.40653	-39.6244		-31.0375	-73.4041	-69.6839
-401.1	-243.1	-37.4		-211.033	-109.994	-202.608		-42.3205	-318.737	-95.286		80.1064	-35.2957	-45.4308
-401.1	-243.1	-37.4		-44.2273	-222.731	-220.886		-57.9546	-168.718	-4.38127		21.2564	-3.30607	-13.9947
-401.1	-243.1	-37.4		-90.1464	-137.187	-303.847		-323.649	-49.0396	-53.3342		23.5338	-38.0271	-51.6739
-401.1	-243.1	-37.4		-70.757	-124.078	-220.758		-180.28	33.2197	-57.5468		33.2312	-44.1127	-30.1938
-226.88	-243.1	-37.4		-326.459	-62.4454	-262.643		-39.3488	-137.633	-92.7566		-66.9068	-2.39663	28.3263
-226.88	-240.9	-37.4		-148.508	-72.2495	-171.761		1.64814	65.2326	7.94907		-37.409	-47.2574	-49.8117
-226.88	-240.9	-37.4		-317.984	-113.457	-188.223		-285.23	-13.9188	-121.544		38.1531	-95.0151	-24.6854
-106.35	-240.9	-232		28.9103	-92.9442	109.972		-177.904	-90.7525	-55.5647		-37.2072	-16.0402	-72.357
-106.35	-240.9	-232		-61.7428	-18.8949	-323.136		-138.339	-80.5402	-104.603		54.0498	17.9637	3.90697
-106.35	-240.9	-232		-29.9265	-178.589	-259.046		58.7825	-48.7843	-32.3915		-43.5252	-11.6262	-53.5269
-106.35	-240.9	-11.6		-26.4249	-10.5153	-226.541		-211.55	-56.0022	-147.681		-55.5173	-7.52057	-21.367
-106.35	-240.9	-11.6		-127.35	-134.577	-193.242		-179.254	-68.4404	-12.315		3.6374	77.6937	-23.2118
-106.35	-240.9	-11.6		17.712	-86.395	-274.074		-139.508	-37.0653	-18.7101		-7.79608	24.1122	3.40678
-106.35	-240.9	-11.6		29.7357	-108.193	-347.841		-100.398	-65.0119	-15.9687		520.821	-44.5798	-54.0284
-106.35	-240.9	-11.6		102.053	-124.053	-137.997		-265.799	-63.4076	-54.495		95.8882	-47.1478	-55.047
-106.35	-240.9	-11.6		-121.707	-96.669	25.2977		-65.8342	-12.9421	-58.4633		14.9018	-20.3252	-75.8703
-106.35	-240.9	-11.6		-28.0698	-199.966	-276.093		-19.9881	-115.378	2.38044		59.4113	-31.4568	-33.8537
-106.35	-240.9	-11.6		-61.8285	4.31548	-136.698		-106.676	-46.2037	-27.0551		8.81538	-60.9025	-35.5331
-106.35	-240.9	-11.6		-0.960252	-92.3133	-177.771		-221.458	-79.549	-40.6763		-69.6681	-2.20838	-14.258
-106.35	-240.9	-11.6		-209.409	-347.939	-209.211		36.8789	-163.593	-78.7699		52.5744	-31.0317	20.1201
-106.35	-240.9	-11.6		7.85647	-233.384	-222.176		-113.724	-115.011	-76.5572		149.481	-124.631	-1.70799
-106.35	-240.9	-11.6		-292.369	11.8779	-207.929		-182.836	81.3888	-118.132		-1.09823	-71.8369	-11.7566
-106.35	-240.9	-11.6		-104.841	-255.625	-122.616		-192.032	-28.2515	-52.9759		-28.4493	-191.851	-31.6114
-106.35	-240.9	-140		-137.472	-125.01	-167.843		-128.507	-70.6972	-73.4155		122.779	16.3048	-61.8577
-155.98	-240.9	-140		28.5108	-129.581	-246.415		-119.231	-101.178	-50.2687		52.3954	221.372	-6.80717
-155.98	-54	-140		-3.52937	-290.358	-186.308		-40.6808	-46.5724	-110.35		-16.9287	-5.86887	-45.4576
-155.98	-54	-140		-83.5234	-14.2813	-110.278		-26.218	-29.2755	-194.959		27.9582	44.6875	-2.66085
-155.98	-54	-140		-213.672	-176.838	-345.811		7.2784	122.592	3.64433		-45.2191	2.67359	-14.2573
-155.98	-54	-140		-190.918	-224.565	-163.779		-44.3019	-161.063	-102.092		-25.2575	-22.5592	11.1496
-29.45	-54	-140		-88.6473	-99.4406	-108.618		-125.665	-12.0402	203.569		-43.8121	2.29225	-29.5838
-29.45	-54	-140		-64.6152	-100.835	-265.969		-14.4073	-264.898	-62.5278		43.1155	-42.9436	-47.4668
-29.45	-54	-140		-261.442	-68.9565	-104.56		-203.071	-72.5783	-77.5561		34.5635	12.2622	-76.4329
-29.45	-54	-40.5		-213.059	-168.627	-179.148		-147.336	-54.7228	-82.2734		-58.8209	155.84	-5.31749
-29.45	-54	-40.5		-74.0207	-253.886	-168.321		-80.2647	-111.753	190.211		-3.51021	5.46853	203.52
-29.45	-54	-40.5		-46.0192	-381.059	-224.411		-62.9895	-29.5586	-68.456		-22.9376	135.935	-41.6221
-29.45	-54	-40.5		-170.771	-129.896	-160.423		-287.41	-108.288	-62.677		0.900087	-27.4302	-38.3594
-788.94	-54	-40.5		-51.5147	-191.515	-193.47		6.36103	-198.223	-3.15537		-13.8565	-18.2621	-14.15
-788.94	-54	-40.5		-11.3688	-30.7331	-261.769		-253.762	-19.0236	570.506		-4.04383	-0.938897	-10.8888
-788.94	-54	-40.5		-172.212	-159.802	-355.597		7.36464	-84.4617	8.52336		14.1536	-51.7086	-5.61077
-51.66	-54	-40.5		-31.2088	-15.7016	-134.524		-135.448	-243.2	-81.4136		-21.5879	-27.347	-18.8738
-51.66	-688.1	-40.5		-0.12729	-200.784	-391.693		-350.572	-83.466	-118.892		-66.391	-69.6521	-57.8874
-51.66	-688.1	-40.5		-71.7693	-184.637	-144.482		-36.0295	-226.597	-85.6323		-11.1468	-9.07979	-2.98176
-51.66	-688.1	-40.5		83.001	3.20005	-260.433		-246.239	-98.8398	-44.2777		13.3572	-92.1663	16.1297
-51.66	-688.1	-40.5		-179.948	-128.348	-127.06		-236.212	-47.7922	-63.9837		-19.862	118.285	398.929
-51.66	-688.1	-40.5		-196.444	-9.585	-376.918		-156.077	-9.65117	-31.0463		-33.2019	-70.4021	-40.3539
-51.66	-688.1	-40.5		-167.87	-19.8488	-367.114		-144.202	-197.735	-15.3236		-9.43875	-36.0248	-35.6496
-51.66	-688.1	-40.5		-38.3704	-109.59	-220.393		36.4159	-26.877	204.38		-1.73757	-24.2417	-31.4188
-51.66	-471.2	-40.5		-234.526	-261.411	-110.731		-5.1766	-74.6509	-54.0524		60.6473	-22.5671	-5.53512
-51.66	-471.2	-40.5		-93.6716	-252.677	-125.492		-122.179	-92.0652	-83.2529		-43.3182	-43.6218	-16.3448
-51.66	-471.2	-40.5		-98.7547	-261.808	-83.8796		8.97749	-108.88	-72.4929		58.5091	-83.1349	-73.2355
-51.66	-471.2	-40.5		-177.468	6.31125	-213.278		-19.4139	43.3292	-108.16		18.5168	-0.825686	167.298
-51.66	-92.8	-40.5		106.211	-180.769	-53.7433		-111.582	-26.799	-67.3829		-34.5931	15.7876	-2.02374
-51.66	-92.8	-40.5		36.8969	-231.637	-300.385		-143.713	-87.1764	76.4967		25.9487	9.21687	-8.30416
-51.66	-92.8	-40.5		-162.482	-188.208	-320.5		-25.4683	-110.705	-53.8178		64.8849	-62.5428	32.8742
-51.66	-20.7	-40.5		-284.2	-158.342	-316.965		-306.59	-72.2562	-74.7541		29.7369	-67.5244	-50.1483
-51.66	-20.7	-40.5		-105.794	-138.095	-282.539		-21.5701	46.4487	-75.1668		-31.671	-18.5465	-37.8557
-51.66	-20.7	-40.5		-46.7883	-269.173	-104.869		-27.9694	175.85	-52.0707		5.58922	-31.5743	-22.6426
-51.66	-20.7	-40.5		-81.0186	-135.24	-196.535		-172.693	-78.8197	-124.611		132.902	-37.3239	-32.4692
-51.66	-20.7	-40.5		3.94107	-234.747	-330.196		-74.8372	-171.428	-10.0266		9.50365	-19.6488	23.5837
-51.66	-20.7	-40.5		-173.473	-102.486	-169.77		-67.7808	-142.23	-66.6157		148.995	-10.5237	80.1638
-51.66	-20.7	-40.5		-292.051	-219.236	-232.282		-33.6097	-265.616	-18.5506		30.4971	-15.9948	200.572
-51.66	-20.7	-40.5		-2.68562	-113.972	-198.831		-11.874	-60.6365	-36.9493		0.273489	-17.7001	-81.4905
-51.66	-20.7	-40.5		6.12355	-374.909	-148.733		-127.397	-112.443	-26.0927		14.9442	-48.3503	-31.145
-198.52	-20.7	-40.5		-22.8424	-63.7776	-250.412		-15.7276	-125.998	-52.5932		43.6007	-29.138	-13.2811
-198.52	-20.7	-40.5		-131.024	-335.196	-215.881		5.18243	-143.652	-69.0951		-25.3243	-3.22995	3.11569
-198.52	-351	-40.5		-159.978	-198.618	-269.135		476.174	-145.482	-16.0656		-56.9119	-109.466	-25.3513
-191.43	-351	-40.5		-65.7602	-136.657	56.6339		-139.703	20.2866	-78.5865		-2.49105	-15.1268	-40.7547
-13.43	-23.2	-40.5		-280.446	-80.9207	-328.543		-110.886	39.0443	-45.9845		13.0744	-48.2453	8.98167
-13.43	-23.2	-40.5		-53.0496	-212.389	-164.225		-143.437	-51.628	-76.4718		220.71	-51.0593	-58.0435
-13.43	-23.2	-40.5		16.9262	-62.1924	-262.885		-151.586	-32.1467	0.521687		-24.0842	-58.1087	41.2769
-13.43	-23.2	-40.5		12.0489	-74.8961	-147.583		-261.187	-68.4163	-127.605		28.3564	-70.7639	-15.7194
-13.43	-23.2	-40.5		-232.939	-272.746	-274.116		-243.061	-107.61	-89.1845		-31.2849	-28.7703	157.436
-13.43	-23.2	-40.5		-32.8401	-22.3181	-174.076		-199.632	-124.193	-105.921		42.1385	-32.8738	-15.1132
-13.43	-23.2	-40.5		-273.358	-125.697	-181.431		-32.4098	-81.014	148.735		-3.77077	-40.5632	13.6131
-13.43	-23.2	-40.5		0.122979	-236.011	-119.633		-90.0137	-7.8213	293.871		36.4214	9.42814	1.6759
-13.43	-23.2	-40.5		83.4381	-103.224	-149.758		44.8785	-102.804	-142.72		7.07417	-80.9435	96.539
-13.43	-116	-40.5		2.95194	-186.321	-341.885		22.218	-68.8775	-57.3612		-61.6526	7.64207	7.68639
-13.43	-116	-40.5		-144.851	-113.224	-142.119		-71.0957	-236.316	-14.7338		9.66528	53.357	-11.5653
-13.43	-116	-40.5		215.58	-102.611	-219.507		-103.738	-221.32	-67.1956		-18.1858	-43.988	11.4217
-13.43	-147.8	-40.5		12.7593	-175.039	-98.5951		-143.192	-90.0721	-44.1638		-16.5862	-62.0621	-41.4504
-13.43	-147.8	-40.5		-135.215	-121.281	-94.3826		-250.861	-185.379	-113.763		88.2465	-104.675	-30.3621
-13.43	-147.8	-40.5		-36.2886	-155.754	-54.8011		-33.1969	-94.8859	-47.2385		27.8908	-70.6758	-27.1519
-13.43	-147.8	-40.5		40.7948	-64.4803	-101.818		-117.307	-159.649	-37.489		35.1567	11.8427	-19.7365
-76.57	-147.8	-40.5		-34.678	61.9427	-213.201		-99.7023	-12.0464	-44.2332		12.9241	-86.8355	-19.0418
-76.57	-31.1	-40.5		-98.0352	-194.652	-149.612		-260.692	49.6617	-114.802		-41.7152	-36.8173	-12.0164
-76.57	-31.1	-40.5		-67.3743	-126.797	-128.702		52.4911	-176.916	-101.883		-10.9671	-68.9683	39.0001
-8.8	-31.1	-40.5		-100.984	-180.055	-224.714		-282.244	-89.6258	-121.567		5.11001	7.16243	-21.926
-8.8	-31.1	-40.5		-109.569	-243.295	-217.998		-16.1885	-29.39	-89.9248		61.2981	32.0449	-40.7521
-8.8	-31.1	-40.5		-83.8773	-302.287	-354.194		-24.1635	9.80188	-11.1334		-60.0263	-40.7407	-22.9494
-8.8	-31.1	-40.5		-443.277	-414.887	-184.747		-143.36	-227.041	-44.4853		-13.9649	-66.2554	-18.465
-8.8	-31.1	-40.5		-344.515	-128.282	-176.527		138.7	-62.9166	52.9887		-60.26	-68.6941	-37.7321
-8.8	-31.1	-40.5		-174.499	-42.2407	-350.533		-311.056	-68.9067	-3.06807		-11.5746	26.2668	27.5841
-8.8	-31.1	-40.5		-280.557	-72.7902	-159.437		-110.451	22.1961	-79.8223		-55.1449	-25.2422	-35.0869
-8.8	-31.1	-40.5		8.0778	-297.082	-295.8		-128.11	-104.285	-119.154		-48.0406	-23.6331	116.142
-8.8	-31.1	-40.5		-26.8251	-336.147	-121.828		9.95031	96.527	-57.0096		-18.885	-37.7576	-3.12098
-8.8	-31.1	-40.5		-147.599	-155.04	-119.613		16.8812	-101.813	-11.458		22.3659	25.861	-31.9445
-8.8	-31.1	-40.5		-56.4073	-113.378	-191.737		-37.9048	-29.0108	-89.1037		4.81525	-32.8095	21.0698
-8.8	-31.1	-40.5		-183.511	-249.834	-243.762		-245.09	-84.7812	-141.975		-1.93999	-88.3929	7.86672
-8.8	-31.1	-40.5		-313.863	-79.7204	-196.837		-100.936	-33.2531	-91.7121		4.16923	41.9097	-2.66607
-8.8	-31.1	-40.5		-152.811	-195.252	-164.664		15.4078	-152.019	-30.3235		53.6243	-37.9281	-11.2082
-8.8	-31.1	-40.5		-183.302	2.63592	-403.629		-146.074	7.00343	-70.2364		66.966	-9.19312	-30.677
-8.8	-31.1	-40.5		-262.733	-41.1277	-204.61		-126.776	-88.1815	-50.03		-94.5641	-0.781054	28.0699
-8.8	-31.1	-40.5		11.0093	-37.0753	-204.393		-206.307	-109.389	-68.8591		-12.4688	-39.4396	-60.0632
-170.16	-31.1	-40.5		-133.12	18.9907	-154.253		-280.677	-87.6137	-31.6334		206.083	-23.2486	-92.9372
-170.16	-31.1	-40.5		-230.595	-44.0173	-170.868		-139.772	-56.6059	-52.5353		6.4845	-49.3516	61.9795
-170.16	-31.1	-40.5		-189.658	-118.315	-302.999		-29.1828	-33.6552	-114.556		2.02082	-1.64253	-52.987
-8.1	-31.1	-40.5		-191.002	-178.895	-278.915		-54.6025	-67.1784	11.8152		-40.2021	14.3163	-34.2838
-8.1	-31.1	-40.5		-139.432	-84.1043	-205.789		-228.524	-120.727	-46.1942		26.9857	-27.5381	6.47024
-8.1	-31.1	-67.2		-82.8521	-37.5906	-230.834		4.91892	-109.591	-20.6735		-30.5956	-61.2175	-52.5596
-8.1	-31.1	-67.2		-151.474	-27.8551	-277.762		-162.065	-65.1065	-33.2398		16.4124	-35.0444	-80.6223
-8.1	-31.1	-67.2		-196.661	-279.448	-96.5517		-81.8462	-64.084	-64.2807		25.2152	-56.2384	-9.61057
-8.1	-31.1	-67.2		-92.0848	-223.356	-230.086		-180.78	-55.2999	-123.795		-2.99511	160.534	20.2971
-8.1	-31.1	-67.2		-98.2673	-145.934	-185.512		-238.722	-145.505	65.7366		-14.1448	-47.8929	-17.8742
-8.1	-31.1	-67.2		-74.8484	-48.942	-238.521		-223.647	-131.069	-75.1926		-2.51781	-52.0675	-22.2198
-8.1	-31.1	-67.2		-223.155	-89.6208	-194.183		-70.8888	19.4793	-48.1264		60.4083	-51.3148	-42.1413
-8.1	-31.1	-67.2		-119.087	-64.7276	-143.037		75.5202	-151.37	-43.0759		4.05561	-17.3645	-84.823
-8.1	-31.1	-67.2		-72.1954	-232.387	-119.64		-2.87594	-17.9879	-97.0547		-119.064	-49.6161	-5.03088
-8.1	-139.2	-67.2		-23.9314	-53.225	-70.9122		96.7636	-90.322	-55.727		13.4964	-18.8755	-7.74079
-8.1	-139.2	-67.2		-84.314	-213.977	-116.58		-15.857	39.8639	-82.7673		50.2187	26.3901	13.7157
-8.1	-139.2	-67.2		-273.134	-126.531	-100.362		-220.168	-85.2408	12.9157		19.9974	-123.813	-30.8991
-8.1	-102.1	-67.2		31.9917	-230.637	-302.12		3.43064	-6.80808	-62.3368		22.4854	-71.5488	-21.4204
-8.1	-102.1	-67.2		-62.2596	-180.669	-229.957		-161.958	-104.707	-9.66809		140.494	17.3363	-48.0135
-8.1	-102.1	-67.2		-97.6323	-213.008	-294.292		-133.3	-75.6212	-54.7555		-8.91156	-37.0372	-101.548
-8.1	-102.1	-67.2		-128.457	-264.662	-443.753		-37.8213	-136.848	-36.7965		19.8268	-6.05746	-7.92118
-170.16	-268.7	-110.6		-155.683	-204.629	-203.827		-50.1101	-107.062	67.1957		-27.7678	64.0021	-30.3346
-170.16	-268.7	-110.6		-154.568	-209.298	-55.4713		-88.7897	-31.5773	-63.6445		13.2673	-75.8986	3.84767
-510.49	-268.7	-110.6		2.8123	0.462407	-234.19		-229.596	-235.24	-40.7583		-147.034	10.7753	-54.0059
-510.49	-268.7	-110.6		-190.459	-60.9047	-288.156		-144.078	-49.7332	-99.0287		32.8878	-6.70422	27.2715
-1042.25	-268.7	-110.6		-22.949	-151.735	-239.376		6.68305	63.7736	-70.6983		387.619	-28.5006	-73.068
-1042.25	-21.3	-110.6		-39.8669	-81.3224	-303.931		8.93976	-6.5395	-30.8907		34.8353	-58.8077	-73.2503
-1042.25	-21.3	-110.6		-110.281	-185.639	-235.398		-258.906	-61.5175	-119.408		-12.4566	-104.983	-29.3382
-255.24	-21.3	-110.6		55.4771	-49.9424	-88.6012		-222.969	-63.6958	-90.4227		75.7045	-47.8654	-11.7467
-255.24	-21.3	-110.6		-141.04	-132.611	-42.5704		-45.2575	-124.943	-35.296		-37.9215	-65.3163	-26.7852
-255.24	-21.3	-40.3		-271.571	-23.3376	-139.699		-0.743896	-220.073	-44.639		48.785	-23.7735	1.00876
-59.36	-21.3	-40.3		22.5874	-126.202	-244.432		-166.243	-112.283	-87.5091		-32.4951	-5.10155	-4.56306
-59.36	-21.3	-40.3		-26.2137	-262.684	-277.504		140.978	-84.3259	-39.3596		2.87909	-41.0949	-71.0733
-59.36	-222	-40.3		6.54622	-17.6786	-129.008		149.276	-95.8761	-33.5516		21.8054	47.8748	-3.85023
-59.36	-222	-40.3		-114.962	-135.539	-280.494		-96.6426	-36.3241	-39.0641		17.3199	-23.1571	-69.2628
-59.36	-222	-40.3		-359.102	-286.532	-366.06		52.005	-34.2396	-120.5		-33.0752	-91.5713	2.63313
-59.36	-222	-40.3		-273.074	-63.944	-143.173		9.59345	-126.275	-85.3549		-19.4407	21.4382	0.931369
-59.36	-222	-40.3		-417.916	-210.206	-237.786		26.6946	-25.0869	161.535		15.6443	-47.1445	22.2796
-59.36	-222	-40.3		-59.3909	-37.539	-270.283		18.4386	-106.024	-56.1212		-1.4432	-99.3512	-55.8797
-59.36	-222	-40.3		6.77335	-98.7478	-326.866		-132.257	-18.021	-27.6261		57.3328	-0.779967	-30.6614
-59.36	-82	-40.3		-245.043	-183.799	-303.817		-103.662	-116.605	-16.0521		38.6122	-83.2438	7.32509
-59.36	-82	-312		-61.2331	-332.714	-158.096		-178.792	-61.2546	-102.496		-22.1665	-11.4856	152.682
-59.36	-82	-312		32.2757	-227.621	-272.866		-86.393	38.1498	-93.8906		14.34	32.313	69.2742
-11.1	-82	-312		-80.288	-109.074	-260.779		57.2489	-212.607	-85.3124		81.7985	-46.1823	-36.7735
-11.1	-82	-30.9		-215.045	-132.376	-250.646		-276.849	-90.1731	-64.5489		59.981	-6.91836	-14.2557
-11.1	-82	-30.9		-370.892	-235.886	-284.339		-64.7601	-106.871	-49.388		-52.8408	-7.21451	-23.2644
-11.1	-82	-30.9		-117.203	-114.493	-132.891		-102.143	-94.7507	-71.045		0.743276	-80.4843	20.3933
-11.1	-82	-30.9		-0.182334	-52.4968	-110.324		-255.632	-0.92595	-105.76		87.0222	6.69746	-63.2019
-11.1	-255.2	-30.9		-65.5717	-212.227	-112.125		-23.296	-38.1528	-75.9755		-41.0132	-14.6247	5.11918
-11.1	-255.2	-30.9		17.2973	-57.0004	-264.299		26.7046	-147.383	-138.543		62.4332	-33.7749	-17.5493
-11.1	-255.2	-30.9		-18.1959	-255.09	-227.946		-254.055	-146.464	-13.9985		29.4502	-83.859	-57.1578
-11.1	-425.4	-30.9		1.25864	-166.179	-204.149		-243.253	-26.8632	-113.434		10.7359	-38.9302	9.43644
-11.1	-42.5	-30.9		-281.887	-140.672	-274.574		-15.36	-176.035	11.7235		48.8136	-21.1879	126.457
-11.1	-42.5	-175.5		58.1553	-49.3892	-284.669		8.70639	-171.499	-2.43708		28.292	-55.579	27.8824
-11.1	-42.5	-175.5		-23.0119	-329.18	-170.761		-10.8007	-70.4324	-46.1202		20.5243	-55.3321	-66.897
-11.1	-42.5	-175.5		-87.2714	-294.779	90.4906		-16.2809	49.3071	-41.5039		21.8994	-25.4317	-57.6518
-11.1	-42.5	-175.5		-141.152	-160.332	-286.739		-37.829	-110.13	-70.5246		42.3305	-33.6501	-22.4497
-11.1	-42.5	-175.5		-60.6454	-146.649	-345.253		-34.0855	-110.628	-119.709		22.5259	-12.5856	-23.0636
-11.1	-42.5	-538.9		-310.264	-305.49	-240.518		-31.3251	-178.403	-56.7295		-31.3673	-144.277	-29.2703
-11.1	-42.5	-538.9		-24.9607	-178.802	-135.814		-245.547	-59.5273	-64.1791		32.6335	-44.133	21.2905
-11.1	-42.5	-538.9		-56.6813	-97.3606	-68.4812		-160.186	-83.2405	-24.5472		-3.75305	-74.1403	-31.7009
-11.1	-42.5	-510.5		14.7233	5.76872	-92.7123		-284.672	-124.993	-40.8123		-0.0760998	8.85746	195.684
-11.1	-42.5	-39.3		55.9792	-122.062	-87.9863		-108.641	-223.583	-67.4808		-23.8912	-33.1638	106.882
-11.1	-42.5	-39.3		144.9	-34.1721	-363.568		-20.8189	12.3122	-9.65795		-48.3216	-64.6378	-25.2468
-11.1	-42.5	-39.3		-171.66	-3.0663	-353.845		-147.042	-131.999	-97.9376		161.249	-66.7342	-11.963
-11.1	-42.5	-39.3		-248.831	-110.156	-277.19		-118.006	-146.053	-52.6143		0.641595	-31.8187	-31.8294
-11.1	-78.1	-39.3		-347.063	-179.968	-217.676		-312.741	-34.8973	3.38219		38.4288	-26.0497	-1.63898
-11.1	-78.1	-39.3		-110.56	-171.942	-312.466		-47.523	-36.273	-146.937		63.5968	-15.0804	257.343
-11.1	-78.1	-39.3		-17.7241	-300.448	-224.382		-40.6616	-153.104	54.1399		38.8483	48.4669	83.0704
-85.08	-78.1	-440.9		468.428	-156.727	-281.439		-188.943	40.4579	100.885		-0.117869	-90.3246	-19.1606
-85.08	-78.1	-440.9		-232.49	-138.903	-266.211		-83.4479	-97.3623	-36.7861		-30.9229	-77.5286	265.298
-85.08	-78.1	-440.9		46.77	-106.821	-47.614		-62.3765	31.9629	-46.0805		68.9488	-100.489	-85.9499
-5.46	-78.1	-92.8		-155.009	-115.121	-12.3932		-174.287	-1.44756	-45.7321		92.4487	-54.3508	-27.1875
-5.46	-78.1	-92.8		493.955	-242.739	-124.565		-129.122	-164.999	-79.2528		-34.2176	-27.2967	-19.1348
-5.46	-78.1	-92.8		-252.749	-204.637	-218.942		-57.8802	-74.8633	-71.6307		-58.6931	72.7025	-29.2244
-5.46	-78.1	-548.3		51.1129	-168.098	-150.139		-234.673	57.0275	-33.9015		-52.5711	25.7192	27.3756
-5.46	-78.1	-548.3		-13.5521	-212.146	-119.543		-62.2981	-106.387	-47.4911		2.87552	-104.263	237.241
-5.46	-78.1	-548.3		-224.137	-273.592	-308.003		-247.331	-76.2526	-112.656		-39.9938	-86.0129	183.752
-5.46	-78.1	-548.3		-4.69964	-66.6426	-157.606		-124.952	-27.1007	-69.6732		40.7128	30.1698	-56.7815
-5.46	-78.1	-548.3		-91.2792	-21.5299	-297.127		-87.2732	-187.906	-62.4518		-25.7598	-30.4112	-3.16495
-5.46	-229.7	-548.3		-7.35475	-35.19	-69.364		-286.172	-61.0829	-45.7164		-8.78464	-8.98832	0.12098
-5.46	-229.7	-548.3		-257.046	-66.5461	-235.43		7.95395	-48.4964	-72.4755		102.344	-16.7312	-24.5123
-5.46	-229.7	-548.3		-77.8071	-173.543	-95.6825		-47.6134	-1.64147	-5.7457		15.2598	22.5625	-73.7021
-5.46	-364.6	-71.6		-44.3255	-306.523	-252.659		-20.9173	-127.221	2.64155		16.5631	-34.5748	21.2418
-5.46	-364.6	-71.6		29.4003	-274.13	-174.927		-132.518	-58.1281	-20.0496		29.8125	52.7603	27.525
-5.46	-68.1	-71.6		0.873059	-251.375	-106.112		-290.146	-199.858	-5.8096		10.704	-64.9242	34.8592
-5.46	-68.1	-71.6		64.8025	-205.838	-254.755		-156.842	-79.4791	-51.7835		4.27767	-32.6258	-40.103
-5.46	-68.1	-71.6		-74.3909	-258.051	-232.251		114.76	-25.2036	-68.2695		147.597	-60.5105	-39.5016
-5.46	-68.1	-71.6		-2.42399	-136.722	-28.2439		-18.8488	58.4364	42.1249		-12.9189	13.1369	-3.11275
-5.46	-574.3	-71.6		-69.464	-117.632	-186.8		-72.2799	-110.854	-10.0167		11.0902	-26.0484	-73.9006
-5.46	-204.2	-71.6		-41.5332	-198.291	-267.375		-185.494	-22.9883	-93.3161		252.852	-2.62559	-20.046
-5.46	-204.2	-71.6		-133.579	-137.6	-350.921		155.824	-159.571	-35.0177		4.73107	-40.4833	67.2118
-5.46	-204.2	-71.6		-31.6441	-87.8887	-184.779		-411.739	-91.94	-49.7052		-10.0651	-44.4238	12.8239
-5.46	-204.2	-71.6		26.2238	52.4003	-216.425		-136.008	-148.347	-16.1221		-11.894	-23.3496	593.18
-5.46	-157.1	-71.6		-6.03587	-303.661	-317.744		-233.366	-47.0763	-5.09257		40.4071	91.8047	20.9454
-5.46	-157.1	-71.6		19.9479	-140.798	-333.295		-43.5696	-68.529	-47.8059		41.1983	-99.742	5.28873
-5.46	-157.1	-71.6		25.476	-126.263	-12.4008		11.3433	-25.5735	-16.8756		-9.70502	-13.8816	0.40379
-5.46	-157.1	-71.6		-286.182	-305.533	-250.933		2.57927	-206.747	-22.3732		-31.876	23.0591	21.2185
-5.46	-157.1	-71.6		-0.72139	-234.159	-136.886		-124.158	-21.5478	-6.37343		46.6864	-50.0926	-53.8385
-5.46	-157.1	-99.9		33.9666	-267.864	-261.955		-279.593	-18.9969	-118.113		-0.205773	53.24	-25.8979
-5.46	-157.1	-99.9		-22.5553	-272.898	-263.937		-282.078	-95.9213	-36.799		-3.23455	29.4913	27.6444
-5.46	-437.6	-99.9		-176.897	-134.342	-309.11		-309.412	-46.7582	-86.953		67.9619	-12.5779	2.42745
-5.46	-437.6	-99.9		67.5244	-87.9986	-254.911		-323.69	42.0169	-67.382		30.1965	31.9727	-15.0926
-5.46	-510.5	-99.9		6.94364	-117.352	-304.561		-107.739	-112.676	-64.7435		-42.4916	14.8047	-19.8017
-5.46	-314.1	-99.9		-51.6411	-75.2455	-114.064		2.78763	-156.535	-93.8543		26.1449	-109.589	24.6956
-5.46	-314.1	-99.9		48.6477	-249.227	-171.331		-19.8725	-24.8722	-75.2156		-27.0379	-71.037	-48.374
-5.46	-314.1	-99.9		-295.308	-46.6307	-159.68		-95.8231	-118.576	-86.1879		1.16477	-57.6045	-43.0495
-5.46	-314.1	-99.9		-84.6309	-54.1419	-247.922		-182.305	-178.71	-74.6296		57.577	-106.422	-13.6391
-5.46	-319.1	-99.9		-22.2933	-122.708	-123.728		-153.428	-202.125	-20.8439		-17.1188	-124.282	-23.1417
-5.46	-319.1	-99.9		-156.991	-118.7	-116.208		-158.357	-196.459	22.4161		35.0877	-1.15857	-20.2939
-5.46	-804.4	-99.9		-105.191	-122.605	-273.505		-261.846	-106.61	-105.066		-15.3128	3.25993	114.627
-5.46	-804.4	-99.9		-234.957	-78.7197	-233.902		-223.026	-101.623	-122.496		-98.3086	-74.7373	-21.1775
-5.46	-804.4	-99.9		-152.225	-148.219	-255.723		-39.2392	4.19101	-49.1186		19.3131	-15.4425	-2.49275
-5.46	-804.4	-99.9		79.5361	-39.1507	-252.942		-117.675	28.807	-104.35		5.88514	-1.62501	70.2804
-5.46	-804.4	-99.9		-245.032	-22.5061	-322.414		-219.835	-41.0768	-39.8399		21.5896	2.9831	29.6689
-5.46	-804.4	-99.9		-251.78	-213.729	-89.3718		-90.3584	-11.0741	-43.2096		34.5151	-19.6196	85.5383
-5.46	-804.4	-99.9		9.84567	-227.352	-397.713		-77.7389	-112.467	-26.5586		59.1414	-58.2515	-31.1558
-5.46	-804.4	-99.9		-211.709	7.76334	-297.494		-176.986	-202.751	-77.9464		53.1788	-49.0789	-21.938
-5.46	-804.4	-99.9		-68.5175	-134.418	-211.566		-126.421	26.9145	-114.542		-94.993	2.40145	-70.3388
-5.46	-272.3	-99.9		34.3441	-340.772	-427.147		-182.132	-54.6618	-43.4212		59.8757	7.13394	-53.7508
-5.46	-272.3	-99.9		30.5486	-255.217	-263.038		-105.835	-40.2107	-52.7148		-1.00138	-38.7792	-50.2218
-5.46	-272.3	-99.9		-5.8044	-271.964	-76.9376		-205.909	-29.6641	77.1803		36.438	-20.9692	-89.2872
-5.46	-272.3	-99.9		-118.059	-207.938	228.204		-355.373	20.3252	-37.7721		1.34976	-69.0685	-4.89241
-5.46	-239.3	-99.9		-61.3099	-324.852	-270.204		-58.2326	-44.2085	-19.7142		-38.7987	13.2269	-66.9035
-5.46	-239.3	-99.9		-38.4926	-155.348	-132.602		22.1893	-106.513	-138.32		33.0016	39.7688	-13.7282
-5.46	-239.3	-99.9		-200.998	-99.9361	-376.782		-95.8664	-79.8858	288.349		2.60458	-55.3456	-18.944
-71.79	-239.3	-62.1		-196.613	-41.8836	56.9254		-366.028	-77.6811	9.19478		-36.7787	-31.67	-14.346
-71.79	-239.3	-62.1		-93.251	-151.651	-92.6567		61.0312	-95.6014	-65.7921		75.0504	-44.9814	-33.8356
-71.79	-18.9	-62.1		-117.262	-8.19272	-410.518		-359.994	-148.651	19.6745		19.789	-62.5552	5.11195
-71.79	-18.9	-62.1		-93.6635	-143.968	-354.326		-292.18	-107.37	-10.3362		-37.6203	-8.01584	16.4564
-71.79	-18.9	-62.1		-281.963	-39.7432	-127.907		-439.403	-177.929	-63.5388		-61.6782	-19.013	-53.1688
-71.79	-18.9	-62.1		-263.881	-82.6429	-251.454		-297.754	-48.9812	-57.632		2.46258	1.11448	-9.46907
-71.79	-18.9	-62.1		-53.6064	-116.991	232.984		-103.628	8.71966	-102.642		25.3159	-38.4205	-23.0966
-71.79	-18.9	-62.1		17.5022	-293.995	-126.466		-99.8939	-12.7263	-38.6016		-54.7821	-5.85419	-37.4265
-71.79	-18.9	-62.1		-62.2127	-299.36	-32.0698		-115.78	-47.8507	-38.0419		15.7954	-1.00277	3.24935
-102.1	-18.9	-62.1		35.0481	-418.311	-160.997		-202.935	-83.7976	52.4307		20.7361	-93.4019	-43.2709
-5.7	-467.9	-62.1		176.95	-190.836	-208.242		-96.6415	-183.434	-146.004		-56.3508	-2.55979	-44.8262
-5.7	-467.9	-44.7		6.51402	-232.125	-70.8087		-155.204	-154.198	-104.004		-67.8965	94.4263	29.6995
-5.7	-94.6	-44.7		-123.893	-131.628	-268.341		54.1685	-214.896	-51.9453		-52.6753	-37.8821	77.7406
-5.7	-94.6	-44.7		-13.4008	-265.961	-101.095		-80.8874	-59.3375	-84.8596		1.62106	39.016	11.3227
-5.7	-94.6	-44.7		35.2581	-191.426	-301.216		27.2513	-10.0885	-59.3715		38.8775	29.7081	-83.5168
-5.7	-94.6	-44.7		-220.07	48.7306	-159.278		-109.367	-41.1542	15.4904		31.7871	-52.6607	-57.0621
-5.7	-94.6	-44.7		-253.44	101.809	-192.15		-100.985	-145.785	-169.959		47.7959	-39.6711	-65.1382
-5.7	-94.6	-44.7		-45.3758	-165.064	-155.486		3.8625	-119.526	-63.6349		-22.4606	-56.24	-11.664
-5.7	-94.6	-44.7		-127.063	-359.199	-228.261		59.347	-72.2978	389.354		43.8166	-114.209	13.0752
-5.7	-94.6	-44.7		-208.192	-309.14	-155.588		-64.6399	-143.034	0.575044		0.940216	-47.2979	47.6796
-5.7	-94.6	-44.7		-132.255	-167.803	-79.0448		-62.5909	-72.4832	-61.777		-29.099	-39.4007	-46.5592
-5.7	-94.6	-44.7		61.0212	-57.304	-208.751		-72.0024	1.76731	-51.9808		29.9427	4.86478	-53.4931
-5.7	-94.6	-680.7		-141.894	-160.722	-177.695		-17.0698	-104.605	-18.9901		-81.2837	-63.3586	-57.8897
-5.7	-94.6	-117.8		-228.363	-168.668	-250.329		-20.336	-20.1938	-44.009		-40.6806	27.4196	-74.2343
-5.7	-94.6	-117.8		-170.484	-343.846	-340.662		-107.537	-197.208	-25.8909		-89.5547	-23.7805	12.5976
-5.7	-94.6	-117.8		-35.2908	-260.639	-233.241		62.2133	-87.5127	58.8974		-34.03	-37.5716	-17.4398
-5.7	-94.6	-117.8		-294.104	-144.837	-180.021		-119.69	-86.4727	-43.8193		-49.1428	-67.4759	-36.3062
-5.7	-94.6	-95.7		-41.4169	40.9102	-150.059		-85.4313	-225.001	5.63942		23.7582	38.0357	-120.031
-5.7	-94.6	-95.7		-470.694	-43.6665	-246.701		-61.5213	-7.09331	-92.2216		-35.7888	-61.288	21.6798
-5.7	-94.6	-223.3		-326.365	41.7168	-244.119		-182.741	-199.028	-89.4459		5.59646	-57.3109	-41.2111
-5.7	-94.6	-223.3		-198.288	-165.462	-352.033		-298.152	-3.81261	-87.1624		33.6268	-110.943	3.18422
-5.7	-94.6	-164.1		33.1771	-123.042	-258.739		-84.6567	-39.0195	30.9052		19.6079	-71.8469	-67.9717
-5.7	-94.6	-164.1		-37.6618	-100.598	-198.103		-169.546	-34.305	-74.2756		40.2029	-10.958	-37.4394
-5.7	-94.6	-164.1		-344.433	-129.008	-124		-241.765	-117.815	-60.3478		-33.3671	-66.3675	-6.32677
-5.7	-94.6	-164.1		-44.6918	-38.9817	-324.225		15.1194	-76.8826	-16.0979		2.63043	-30.9146	-35.0307
-5.7	-94.6	-164.1		-83.9754	-286.473	-277.104		70.9722	8.86075	-28.6446		65.5778	86.2722	-21.8144
-5.7	-94.6	-164.1		-22.3726	-382.752	-330.36		-310.644	-7.26291	-17.6418		42.1569	56.4946	-39.8959
-5.7	-36.5	-164.1		-92.6604	-162.258	-188.439		-115.32	-51.0772	-82.1368		-115.776	-51.6025	56.8446
-5.7	-36.5	-164.1		-38.134	-244.687	-196.458		-92.3119	8.06587	-46.4234		24.9879	-69.1232	-21.0095
-5.7	-36.5	-164.1		-17.4103	-323.059	-117.66		-67.5149	-63.3355	-56.2411		-20.3915	-56.7507	-34.6403
-5.7	-36.5	-164.1		-147.995	-201.13	-318.838		-120.761	-73.9959	-33.3678		-15.6717	-7.29888	-27.6462
-5.7	-36.5	-164.1		-150.681	-141.911	-197.012		-219.289	-187.645	-61.8789		15.6262	-20.8752	60.4181
-5.7	-36.5	-164.1		-299.176	-84.9209	-178.002		-149.237	-79.858	-43.1909		-14.2357	-97.1818	116.94
-5.7	-36.5	-79.8		100.172	38.4891	-94.7976		-350.801	38.8734	-106.356		-98.3595	-7.53515	-36.4792
-5.7	-36.5	-79.8		-118.572	-122.036	-168.264		-10.6808	-79.893	-93.3644		79.878	-66.1444	-55.7106
-5.7	-36.5	-79.8		64.2694	-348.255	-325.744		-116.713	-90.166	-37.72		21.5856	-76.1135	-0.063358
-5.7	-36.5	-79.8		-46.6155	-149.44	-140.85		-189.737	-116.714	-32.4886		14.7175	-62.5166	-1.9806
-5.7	-36.5	-79.8		-7.69286	-105.877	-196.419		-36.3715	-84.6393	-79.4078		-13.3265	-66.1615	-4.31265
-5.7	-36.5	-79.8		-118.874	-36.7984	-152.139		-43.3172	-87.3187	-13.9955		51.768	-36.8237	31.3621
-5.7	-36.5	-79.8		27.5803	-154.683	-85.2025		-26.0963	-71.8584	-91.6664		28.5787	-50.4979	-77.1421
-5.7	-36.5	-79.8		-204.132	-104.354	-145.597		-24.3853	-75.8345	-48.2494		-70.2449	-74.8753	46.1991
-5.7	-36.5	-79.8		-30.5101	-228.562	-461.004		-95.8594	-7.18522	-35.8996		32.3594	-68.2354	-40.1451
-5.7	-36.5	-153.1		63.1921	-83.8379	-238.175		-54.1742	-24.5904	-22.7228		-74.6319	25.6675	5.2933
-5.7	-36.5	-153.1		-29.3728	-222.315	-286.574		-125.086	-75.8124	-45.812		-54.4108	34.9448	-1.44286
-5.7	-36.5	-153.1		-429.05	-96.6694	-262.309		-99.5769	-191.241	35.8706		218.379	-24.9039	-64.1108
-5.7	-36.5	-153.1		-152.534	-290.467	-306.371		-7.85735	-109.826	-46.4171		-52.8691	-37.1005	-56.6312
-5.7	-36.5	-78		-124.387	-261.837	-269.112		-408.273	-112.369	-136.233		28.2505	-5.0822	5.84516
-5.7	-36.5	-78		-212.264	-109.15	-190.905		-65.1037	-108.046	-74.0691		9.06346	25.2023	11.1523
-5.7	-36.5	-78		18.4934	-53.6838	-234.681		-22.3404	-54.8212	-62.3582		54.5466	-14.9971	-3.48038
-5.7	-97.2	-78		-8.36864	-140.425	-178.282		-115.278	-46.0156	-169.568		22.994	-72.4608	-39.7801
-5.7	-97.2	-78		-46.7143	-224.915	-164.91		-123.219	-38.0072	-65.218		19.5602	-54.9199	-49.983
-7.89	-97.2	-78		-150.018	-57.5966	-186.666		-236.509	-208.72	-94.1553		-1.01098	244.296	-71.9854
-7.89	-97.2	-78		-296.225	15.6531	-288.464		-54.7313	-68.0741	-45.0317		10.0611	-92.0012	164.342
-7.89	-97.2	-78		-63.3364	13.7859	-236.491		-107.283	-105.005	-147.474		0.869114	-29.7455	-32.9168
-7.89	-97.2	-78		-258.71	-65.9625	-195.091		-174.376	-6.45602	29.5386		-37.1036	-19.9269	-35.2777
-7.89	-18.2	-78		51.1489	-158.421	-182.887		-195.106	-13.3532	-3.46601		14.6651	-59.0937	-36.8872
-7.89	-18.2	-626.5		149.147	-21.0063	-246.824		-335.467	-91.7155	-83.558		-71.5176	-71.6792	62.7396
-7.89	-18.2	-626.5		-65.7746	-213.331	-140.471		-280.053	-6.49484	-38.8652		-13.1729	-7.4816	-77.9033
-7.89	-18.2	-626.5		88.3942	-148.782	-182.425		-172.703	-23.128	-144.442		38.7233	-77.7262	-61.9488
-7.89	-18.2	-212.7		-25.8048	-30.58	-154.424		-101.65	-19.7285	-55.3367		47.1766	-3.22769	-4.98764
-7.89	-18.2	-212.7		-75.9139	-174.974	-303.138		-155.885	-44.6225	-103.064		-0.704924	-45.6747	1.27204
-7.89	-18.2	-212.7		-347.17	-7.61179	-411.111		150.167	-200.471	-55.7996		-33.5816	-6.00073	-76.9504
-7.89	-18.2	-212.7		-54.0561	-53.2786	-200.783		-5.5468	-29.3805	-60.1789		36.2824	20.9684	202.322
-7.89	-18.2	-212.7		-142.143	-88.9934	-167.504		-58.5461	-157.458	6.37878		23.6278	-80.5969	-32.5989
-7.89	-18.2	-127.6		-89.3139	-162.322	-224.163		-281.756	-103.642	-81.6626		1.86066	-67.4645	-54.6672
-7.89	-18.2	-127.6		-176.837	-79.5233	-210.175		-64.7197	-144.622	-112.382		34.7036	-46.2083	34.8743
-7.89	-18.2	-127.6		219.806	-80.6702	-243.169		-199.558	-95.8125	-32.2046		310.032	63.9761	-77.4641
-7.89	-18.2	-127.6		199.472	-192.054	-295.222		-110.468	-212.56	-11.1545		125.794	-4.2034	-36.4543
-7.89	-18.2	-1276.2		-62.2335	-228.86	-126.083		-144.197	-61.5268	-45.3559		-11.6258	-60.4547	-13.356
-7.89	-18.2	-226.9		-7.6316	-241.553	-246.613		-131.304	-3.12229	-122.846		8.47939	12.9708	23.7529
-7.89	-18.2	-226.9		42.4579	-219.861	-123.506		85.3161	-1.40041	-66.0081		2.45964	-89.1466	-34.3957
-7.89	-18.2	-226.9		-90.7649	-123.861	-123.085		-6.36452	-74.6276	-38.1314		32.0322	-14.277	-40.8332
-7.89	-18.2	-150.8		34.0084	-280.17	-153.903		32.7964	-65.6344	-84.1926		86.6748	-58.7845	-21.9232
-7.89	-18.2	-150.8		-264.835	-165.783	-129.651		-64.8629	-121.72	-40.9147		21.5495	-2.44515	9.96481
-7.89	-18.2	-150.8		-23.0924	3.99792	-140.506		-259.978	-116.771	-84.3225		-6.05283	-60.1114	18.2404
-7.89	-18.2	-150.8		-285.252	-164.868	-311.333		-28.402	-61.5372	-42.2758		-53.1337	8.21774	-82.8344
-7.89	-18.2	-150.8		-96.02	-130.399	-214.458		-167.481	-31.3147	-50.5872		-50.5512	44.9849	-17.9026
-7.89	-18.2	-150.8		-136.903	-74.6921	-122.219		-34.4062	106.025	-109.357		-38.8152	-35.2268	-1.65924
-7.89	-18.2	-111		13.9199	-272.165	-200.114		68.4981	-38.025	-64.0467		150.113	14.9052	-47.9066
-199.94	-18.2	-111		-149.471	-3.61857	-262.865		-11.3652	-14.3191	-112.843		10.8734	-82.1761	-49.2849
-199.94	-18.2	-111		-181.537	-290.792	-289.211		-273.529	-96.7323	-19.6099		-50.9332	-128.85	-50.9437
-199.94	-18.2	-111		2.44716	32.8782	-194.624		-215.509	-152.349	370.479		30.3855	-70.4818	-85.9914
-199.94	-18.2	-111		-326.789	-317.006	-318.394		68.8387	-93.2395	-42.7509		-1.41646	-43.5673	-17.1317
-199.94	-18.2	-111		-31.3506	-304.282	-252.01		-84.8399	142.044	-56.0947		-56.0893	-74.5977	15.208
-199.94	-18.2	-111		-289.448	-304.466	-165.451		-132.801	-71.5528	-32.1031		13.0626	-17.5173	-22.6039
-199.94	-18.2	-217.4		-159.405	15.7244	-203.296		-362.438	-239.367	51.1999		42.3757	44.2344	-39.0459
-199.94	-18.2	-217.4		-99.8793	-166.564	-81.3939		-290.767	41.0534	910.718		26.5556	-43.5649	-16.1486
-199.94	-18.2	-217.4		-243.225	-217.788	-226.986		37.774	-107.276	482.348		-2.42881	-26.8669	-10.199
-199.94	-18.2	-217.4		-80.2738	-359.448	-158.61		-99.1411	-196.432	-49.9807		53.7801	24.4469	-7.43199
-199.94	-18.2	-217.4		-291.164	-76.6172	-206.423		-303.505	-161.089	-8.21371		15.173	-28.5326	-4.54189
-199.94	-18.2	-217.4		5.10777	-317.901	-232.215		-23.5733	-93.2409	-104.073		7.17364	-79.8763	4.90602
-199.94	-18.2	-217.4		-143.879	-207.439	-247.087		375.34	-239.394	-103.043		-21.3972	-111.577	-45.328
-199.94	-18.2	-217.4		22.2681	29.235	-271.772		-60.355	-99.9615	24.3649		3.40135	-38.8763	-51.9605
-199.94	-18.2	-432		-119.832	-172.285	-292.687		-425.738	-53.6246	-7.16382		24.6936	-126.073	0.111191
-199.94	-18.2	-432		-137.891	-391.261	-144.287		-25.8703	-163.592	34.2416		0.114228	-36.5134	15.9502
-199.94	-719.3	-432		80.0828	-292.526	-225.952		-132.871	-110.251	-35.4499		-31.3363	-37.4014	-0.209277
-553.03	-719.3	-432		-58.4427	-233.458	-130.104		-233.578	-134.046	-116.036		-4.13834	-77.5369	-140.058
-553.03	-719.3	-191.4		-65.9779	-107.763	-407.095		23.6998	-53.6208	-37.4892		41.75	6.31286	-38.4232
-135.13	-719.3	-191.4		-22.5663	-252.634	-145.248		-11.1279	-73.6168	-58.0439		-32.5868	-84.1576	4.85164
-135.13	-719.3	-191.4		-184.656	-199.677	-206.788		-19.8453	-50.1048	-2.33617		31.722	-46.0299	283.285
-135.13	-719.3	-204.2		-87.5965	-204.5	-257.105		-114.6	26.0328	-34.805		27.8175	-44.0412	4.2164
-135.13	-85.1	-204.2		-221.042	-138.279	-194.463		-153.015	-61.7416	-134.145		-5.64648	-58.0092	-58.1536
-135.13	-85.1	-204.2		-2.33765	-198.901	-140.065		-127.047	-23.4825	11.0794		119.87	-60.3067	-28.7922
-425.41	-85.1	-340.3		-18.3628	-235.905	-220.942		-46.9292	-133.644	-114.081		-40.7472	-48.3216	-74.1553
-425.41	-85.1	-340.3		-143.143	145.383	-281.663		-30.802	-63.5041	-31.1356		37.8022	-24.0999	-45.1783
-446.68	-85.1	-340.3		-82.5991	-285.504	-167.46		46.3276	-144.411	-67.8938		74.4149	-80.1587	82.7439
-319.06	-106.7	-283.6		-107.241	-174.202	-292.139		-101.955	9.75777	-120.274		-29.986	-44.4387	-45.8839
-75.07	-106.7	-283.6		-156.437	1.63712	-194.326		-169.177	-165.236	-1.4264		41.897	19.1983	-42.4405
-75.07	-106.7	-283.6		-66.444	-147.805	-124.88		-173.486	-93.5569	61.8955		14.4128	-67.8739	-32.3902
-75.07	-106.7	-255.2		-58.4672	23.2725	-131.93		-234.163	-70.1913	7.93823		-25.5882	-73.2479	-103.859
-75.07	-106.7	-255.2		-149.557	-237.819	-185.413		-48.0492	-173.442	-39.5028		-12.1791	-0.141859	-77.1038
-75.07	-106.7	-255.2		-112.401	-311.766	-211.614		-171.028	-134.774	-5.73849		-58.8829	-23.1032	-72.7252
-19.14	-106.7	-255.2		-15.8974	-196.094	-321.112		-217.863	-200.361	-1.80403		36.9586	-45.0782	177.671
-19.14	-106.7	-255.2		-82.1004	-181.618	-309.068		-292.324	-120.3	-82.9098		2.29864	-44.9453	-64.7
-19.14	-106.7	-255.2		-69.0446	-182.806	-156.021		-138.878	-130.011	20.8983		-3.00523	2.6376	-36.3517
-19.14	-106.7	-360.3		15.4174	-105.921	-316.931		-151.059	-142.757	-177.131		10.1299	11.4475	-12.0671
-19.14	-106.7	-360.3		-10.03	-72.7861	-324.785		-116.145	-51.9357	-73.8815		181.342	-92.482	7.97904
-19.14	-106.7	-360.3		-98.6476	-203.989	-189.419		-235.889	-324.808	130.375		45.3911	-35.987	-28.2084
-19.14	-106.7	-360.3		12.1875	-138.014	-211.738		-119.007	-20.1677	-46.0318		4.84462	-45.1756	-4.17764
-19.14	-106.7	-360.3		-159.084	-93.5611	-385.403		-152.046	54.4914	-49.2574		31.3346	-39.9858	-141.553
-19.14	-106.7	-182.3		-389.75	-61.6596	-306.496		-7.59532	-296.696	-37.3669		61.9494	-34.6617	213.527
-19.14	-106.7	-182.3		-159.912	-36.3455	-402.632		-288.822	-179.126	-42.5707		103.584	-12.4514	-23.119
-19.14	-107.5	-182.3		164.434	-37.0563	-119.085		51.8829	-102.968	-28.7019		-13.2906	21.9167	-58.1835
-3.57	-107.5	-182.3		-317.388	-273.959	-295.032		-239.291	-176.264	-60.0559		9.144	-29.754	-42.5255
-3.57	-107.5	-182.3		-106.584	-60.6546	-169.253		-105.345	-153.951	-38.8181		-21.2245	-47.0969	-85.4425
-3.57	-107.5	-182.3		-199.56	-245.908	-238.291		-10.8551	-45.5365	-60.3053		46.3903	-25.4627	-23.7995
-3.57	-107.5	-182.3		-386.955	-137.987	-135.803		-163.551	-98.6782	44.4899		-9.29806	8.78638	-9.22794
-3.57	-390.4	-182.3		-227.473	-299.332	-125.744		-72.2213	-46.5548	89.7999		-42.9364	-29.9889	-103.542
-3.57	-390.4	-182.3		-168.945	-180.094	-192.137		-247.346	-177.175	-36.2528		44.6292	-96.5307	-66.2951
-3.57	-390.4	-182.3		-405.195	-353.52	-238.07		40.6415	-131.756	-90.1289		7.02451	-23.5992	-61.6948
-3.57	-390.4	-182.3		-215.607	-132.816	-277.055		138.532	30.9146	-21.6985		33.7122	-2.06103	1.67857
-3.57	-390.4	-182.3		-14.3043	-257.348	-296.301		-282.245	57.4677	-120.567		49.4226	-9.18331	-115.659
-3.57	-191.4	-182.3		-168.04	-5.76863	-133.962		19.6842	-80.2574	-97.2578		-48.427	14.9181	2.15873
-3.57	-191.4	-182.3		-15.4001	-254.45	-273.369		34.4213	-65.5665	-92.7215		26.471	-36.2621	-29.9624
-3.57	-191.4	-182.3		-126.878	-441.902	-175.571		-131.262	-40.7653	-95.0354		-17.5584	-28.8881	-30.6994
-3.57	-191.4	-182.3		-81.8008	-266.684	-98.0014		18.7637	-113.966	-3.7306		4.13381	-19.655	328.304
-3.57	-191.4	-182.3		15.9949	-124.465	-245.371		-50.6088	-22.5661	44.0104		-2.6201	34.4834	-15.1686
-3.57	-191.4	-182.3		-110.209	-361.48	255.13		-153.912	-58.059	-41.6916		-44.476	1.55083	-50.9843
-3.57	-191.4	-35.5		-93.8242	-269.201	122.739		51.5146	81.0352	-0.367654		-43.5356	-11.1977	5.76242
-3.57	-191.4	-35.5		-82.4433	-82.2942	-263.514		-39.5865	51.6602	-71.6679		71.7581	-55.7464	-23.2561
-3.57	-191.4	-35.5		-124.7	-284.045	-144.441		-57.0645	-163.296	-92.6289		-39.7471	-24.9496	-33.0253
-3.57	-191.4	-35.5		-45.7885	-36.2834	-277.794		-179.793	-17.3022	4.4824		67.8436	-2.19876	-7.48246
-3.57	-191.4	-35.5		-96.6055	-120.063	-123.787		-338.021	5.27676	-41.6125		10.4528	-2.51654	-5.9024
-3.57	-191.4	-35.5		-220.007	5.93678	-362.97		47.9692	-128.447	-9.57869		23.132	-52.6689	-19.5762
-3.57	-191.4	-35.5		-103.804	-149.776	-310.242		-209.982	-11.6305	-93.515		56.0771	11.0661	33.1639
-3.57	-191.4	-35.5		-66.7962	-152.646	-118.576		-68.3051	-96.9182	-30.0917		15.1477	-59.8286	-65.9115
-3.57	-191.4	-35.5		-78.185	-90.093	-192.469		394.392	-181.003	-137.338		32.6146	-72.3231	-27.2276
-3.57	-191.4	-35.5		-276.644	-81.0529	-178.735		-236.015	-73.9592	6.58437		30.4442	-36.2804	-38.5457
-3.57	-191.4	-282.1		-135.698	-197.921	-242.82		-275.127	-111.721	-94.4983		39.5389	-4.28367	-27.6201
-3.57	-191.4	-282.1		-286.012	-245.43	-255.251		-57.4362	-69.9166	-88.3989		17.8141	-22.9269	50.8034
-3.57	-191.4	-282.1		-237.594	-24.9478	-213.405		-37.5076	-13.8979	-25.2185		46.7676	4.91006	11.6898
-3.57	-191.4	-282.1		-227.024	29.8275	-103.595		19.6572	-72.2991	-153.6		11.771	-74.4946	-26.4782
-3.57	-191.4	-282.1		-25.1161	-91.0013	-219.503		-146.349	-32.2512	-38.5283		6.91807	-21.2883	-60.8924
-3.57	-474	-282.1		-65.6232	-132.008	-194.001		164.182	-129.171	-110.374		15.2181	-72.6725	16.9223
-3.57	-474	-282.1		42.5953	-184.391	-285.354		-136.212	-158.241	-129.757		37.493	-41.6893	-42.352
-3.57	-474	-282.1		-93.746	-169.165	-147.645		29.8423	-131.492	-26.8073		-5.78894	-36.8188	-26.6281
-3.57	-474	-282.1		-180.645	-119.008	-152.074		192.146	-25.767	-53.5539		29.909	0.648028	4.56691
-3.57	-474	-282.1		-107.113	-48.3819	-141.27		-150.828	-58.091	-63.4203		-3.33236	-9.09275	-11.7824
-3.57	-474	-282.1		-183.948	-100.245	-242.003		-103.506	-57.5544	-13.8742		-44.6796	-72.7656	-43.5366
-3.57	-838.7	-15.5		-251.74	-60.9977	-215.341		-190.437	-67.9253	-40.7654		42.4153	8.63162	6.34693
-3.57	-838.7	-15.5		-204.494	-130.247	-207.58		36.5399	-18.2866	-42.1434		-7.54255	-5.04393	28.8685
-3.57	-182.3	-15.5		-22.8473	-139.168	-213.237		-2.43035	-105.094	-25.3982		59.9394	-20.4854	4.5914
-3.57	-182.3	-15.5		0.549585	-169.453	-125.415		-241.264	-27.928	-61.389		-13.5032	-72.3885	-2.2429
-3.57	-212.7	-15.5		-191.877	-196.714	-249.439		37.0335	-64.4622	-74.5923		-16.7545	-82.2094	-10.2715
-153.15	-212.7	-15.5		-213.58	-47.3953	-224.876		-252.299	-156.975	-38.9632		-32.5766	-52.7102	0.482985
-692.81	-159.5	-15.5		-61.1726	-297.765	-332.516		-53.2983	-106.645	-53.9863		6.74971	10.968	6.88428
-692.81	-159.5	-15.5		-102.256	-205.926	525.022		-27.4695	-167.007	-71.7066		-44.9255	-26.1718	-4.26301
-32.93	-139.2	-15.5		-190.708	-136.807	-234.558		20.7297	-47.6349	-73.0055		-33.8582	-46.2509	-65.7787
-32.93	-139.2	-287.2		-242.088	-192.77	-97.0708		47.3827	-62.2576	-40.4526		-9.14958	-6.21405	-68.11
-32.93	-139.2	-287.2		440.554	-195.801	-212.339		-152.377	3.96783	-145.361		-27.4217	-85.071	91.7016
-32.93	-107.6	-287.2		-275.485	-62.0188	-189.193		-136.555	-84.2632	-48.2337		27.1737	5.38535	-17.6515
-32.93	-107.6	-287.2		-241.707	-24.7676	-274.209		-478.91	-115.48	-48.4225		74.004	-48.8231	-3.08472
-32.93	-107.6	-287.2		-124.966	-93.0109	-290.361		-296.653	-223.676	-95.9616		-30.3358	-64.675	-83.9209
-32.93	-107.6	-191.4		-465.33	-189.146	-274.118		-398.577	-122.708	-122.44		22.9901	-10.4564	-22.4178
-32.93	-107.6	-191.4		-191.04	-102.29	6.62096		-37.7794	-90.4835	-15.6834		76.9163	-30.8524	-53.647
-32.93	-107.6	-117.8		-138.391	-5.4874	-264.769		69.6862	24.2316	-22.639		179.986	-56.5808	10.7803
-236.34	-107.6	-117.8		-14.8501	-107.819	-317.543		-71.4337	-113.449	-14.8068		11.2485	-48.055	26.4245
-236.34	-107.6	-117.8		-193.673	-160.493	-224.777		-158.726	-103.314	0.0868976		11.4851	84.4027	-64.0514
-236.34	-107.6	-117.8		34.0476	-188.224	-145.225		-50.338	62.1774	-49.4045		25.5089	122.858	-58.5775
-236.34	-107.6	-47.3		-53.8839	7.53471	-287.911		-67.9544	-148.166	-14.3212		27.2766	6.70961	-2.98987
-236.34	-107.6	-47.3		-158.958	-164.778	-232.243		-298.053	-69.5893	-37.8862		46.5784	-121.447	-5.76947
-236.34	-107.6	-47.3		-201.828	-348.296	-186.472		55.1951	-50.7457	-96.106		-28.6173	-32.5324	415.148
-236.34	-107.6	-47.3		18.1611	-110.751	-244.475		-91.2087	-55.4664	-30.5195		12.2703	-8.97263	-34.5077
-236.34	-107.6	-47.3		-111.695	-199.383	-227.92		-302.008	-67.7772	-76.8418		42.2944	-57.8004	-23.4164
-315.3	-107.6	-47.3		-10.3288	-45.8826	-236.285		-189.935	-75.5255	-93.8204		-0.343689	-57.6859	273.092
-315.3	-107.6	-47.3		-44.9922	-107	-213.442		-83.1829	57.5721	-91.4921		28.841	-11.5683	56.1299
-315.3	-107.6	-47.3		-8.73288	-149.716	-248.014		-221.472	-87.0214	125.128		-19.4603	-22.4178	-41.3529
-315.3	-107.6	-273.5		58.4923	-163.957	-371.613		-77.7753	-22.9667	20.9485		-45.8065	29.7659	392.62
-315.3	-107.6	-273.5		-109.014	-128.159	-346.426		-165.089	-45.7853	-18.7782		32.5056	-7.11216	-24.029
-139.22	-107.6	-273.5		-303.069	-311.413	-167.499		45.4704	23.1328	-47.3002		89.4002	-78.4949	-53.3531
-139.22	-107.6	-273.5		-233.418	-263.665	-118.631		-112.764	0.490375	-96.6484		-44.1813	-47.5599	-107.556
-139.22	-107.6	-346.4		-135.434	-176.543	-214.789		-248.862	-12.8264	-25.6732		-46.3155	-59.7692	-75.5467
-145.85	-107.6	-346.4		-283.809	-335.169	-247.952		-0.615949	-20.9054	-39.488		-1.95875	-10.8926	-24.573
-145.85	-107.6	-346.4		-34.5846	-105.463	-185.648		-207.027	-198.459	-16.5027		18.299	17.2614	11.8473
-1020.98	-158	-346.4		-123.784	-80.6929	-196.615		-151.067	-77.8221	13.9154		-57.0849	-37.8656	14.7858
-182.32	-158	-670		-33.8057	-7.38106	-236.705		-112.317	-198.291	-33.367		63.5188	-33.1277	11.9198
-182.32	-158	-670		82.139	19.1252	-187.83		79.9756	-117.976	334.494		7.95772	-65.0159	109.286
-182.32	-158	-670		-6.87257	-181.344	-359.071		-138.678	76.9666	138.729		-7.20706	-32.1687	10.1543
-182.32	-158	-670		-23.4356	-196.479	-142.573		-145.527	-153.329	7.3324		92.1451	-57.1296	-113.207
-15.76	-158	-670		18.7421	-72.9278	-248.488		27.2352	-144.25	16.4077		23.938	-56.413	14.6045
-15.76	-113.4	-45.4		-122.421	-343.265	-114.733		-289.692	-101.665	-97.3843		-55.6884	-82.0252	-25.6278
-15.76	-113.4	-45.4		-4.92947	-230.75	-128.283		-377.929	-7.91795	-98.8296		24.5305	-59.4514	-26.0439
-15.76	-113.4	-45.4		-164.046	-5.29853	-315.815		-201.379	-19.7963	64.0493		23.012	-32.1902	-103.96
-15.76	-87.2	-45.4		-43.1909	-42.1763	-202.773		36.1459	-39.3537	-27.7289		14.6306	-59.3346	24.054
-15.76	-87.2	-45.4		-248.406	-89.2528	-295.578		-273.517	-116.205	0.0259649		-14.6034	-15.9774	5.49943
-15.76	-87.2	-45.4		-236.543	-112.235	-314.521		-84.9275	-141.682	-94.9		-47.6625	-95.5301	-17.6794
-15.76	-87.2	-45.4		-123.164	-6.50983	-154.603		29.0387	-56.8433	-94.4108		406.057	-81.17	-50.0289
-15.76	-87.2	-45.4		-62.267	-143.204	-332.311		-182.803	-13.5782	-144.883		-31.3936	-50.4964	6.86627
-15.76	-87.2	-45.4		61.1437	-166.18	-264.52		-332.921	-19.095	44.7355		19.6457	-20.2304	6.29841
-15.76	-87.2	-45.4		-126.794	-104.423	-184.239		-199.649	-93.7949	-96.9622		9.45448	-108.509	36.3092
-15.76	-87.2	-45.4		-138.004	-191.222	-341.965		-171.62	-65.2453	-18.4443		198.607	-49.9573	-44.5006
-15.76	-87.2	-45.4		28.3787	-80.167	-127.133		-324.57	-112.017	-47.9977		-50.9449	-71.8593	-43.6135
-15.76	-87.2	-45.4		-59.6143	-408.811	-191.725		-231.599	-114.693	-90.6396		9.24732	-11.7441	39.8016
-15.76	-87.2	-159.5		-54.208	-101.016	-277.723		-133.887	-80.4502	-40.7392		12.7012	-87.5024	395.833
-15.76	-87.2	-159.5		-0.869752	-159.662	-274.721		-106.855	-182.012	-37.9028		-27.0137	-26.6984	-21.4431
-15.76	-28.6	-145.9		-241.466	-271.537	-236.66		-247.912	-60.363	-56.4785		27.1996	1.06571	-108.959
-15.76	-28.6	-145.9		42.5622	-113.81	-104.68		-238.135	-217.73	-64.1508		13.8536	-6.63555	-21.0763
-15.76	-28.6	-22.2		-108.95	-297.797	-206.843		-144.583	-131.398	-66.552		33.0477	-70.4827	-71.1309
-15.76	-28.6	-22.2		-215.487	-69.9623	-150.706		-46.0363	-188.566	-40.1652		17.0979	-59.1272	-42.9977
-15.76	-28.6	-22.2		-71.607	-240.764	-12.1808		-32.0513	-144.861	-48.0649		-38.6052	-63.2407	-53.1452
-15.76	-28.6	-22.2		-148.027	-158.806	-132.832		58.7931	-153.656	147.915		14.385	-74.057	-72.1221
-15.76	-28.6	-22.2		-70.1719	-194.121	-235.962		-112.284	-91.2489	-0.346716		59.1875	-57.2046	-12.7124
-371.27	-28.6	-22.2		-144.833	-60.1887	-288.823		5.40666	-85.7734	-138.677		36.8096	0.619562	-56.6721
-371.27	-28.6	-22.2		-203.217	-30.4974	-123.659		-103.458	-259.757	-101.534		12.5417	25.9499	-40.7993
-371.27	-28.6	-133.2		-42.9069	-297.227	-248.174		-85.1759	-44.7765	-75.1057		43.8837	-30.0595	-32.9071
-343.6	-28.6	-133.2		2.30308	-64.8263	-320.71		-45.0399	21.5349	145.719		8.72204	-39.6421	-52.7512
-343.6	-28.6	-133.2		-70.9472	-395.545	-211.591		-352.8	-104.442	23.7635		-22.7676	-83.74	-49.8855
-343.6	-28.6	-133.2		-157.088	-172.845	-171.637		-72.3073	-93.4659	-70.4429		-9.45999	-103.745	11.3287
-343.6	-28.6	-133.2		-194.898	-22.3674	-66.4441		-310.03	-124.49	122.067		35.6112	-18.7081	-40.8612
-343.6	-28.6	-133.2		-32.1163	271.932	-181.318		7.66177	-126.025	-63.04		9.34243	-41.687	-26.9096
-343.6	-28.6	-133.2		-25.6042	-27.5926	-203.701		15.0648	-21.5556	-91.3672		-33.7831	-79.9385	-61.0594
-343.6	-28.6	-152.3		-110.532	17.9066	-184.309		-36.7216	-83.5338	-13.079		66.5676	-74.128	11.3117
-510.49	-28.6	-152.3		-92.2214	-233.755	-376.932		-211.648	-67.9848	-52.2299		4.6453	-110.637	68.5114
-510.49	-28.6	-152.3		-67.2165	-93.31	-249.765		-33.9092	-10.6062	-18.101		-32.5409	-65.6702	297.041
-178.67	-28.6	-152.3		-191.911	-194.638	-290.836		-21.3931	-83.2229	-6.86345		90.1437	-46.9553	-64.2933
-178.67	-28.6	-152.3		-184.422	-165.919	-176.3		-67.7334	-120.225	-37.6604		4.30583	54.8752	237.78
-178.67	-28.6	-152.3		19.9364	-145.213	-360.627		-113.959	-197.863	-49.718		18.2536	-25.002	-17.4077
-102.1	-28.6	-152.3		-12.6435	-115.643	-353.196		-69.3174	-132.496	-34.077		12.9436	-59.7625	-65.9465
-102.1	-28.6	-152.3		-5.99694	-64.8091	-229.184		280.715	-79.8179	-34.9689		-118.428	-84.9215	-50.5046
-102.1	-28.6	-152.3		-186.211	-101.45	-199.491		-95.7028	-48.343	-116.018		-8.77432	10.8588	-67.4411
-102.1	-28.6	-152.3		-428.215	-225.566	-307.055		-191.742	-99.3532	-79.1855		21.323	24.6005	-56.5329
-102.1	-28.6	-152.3		6.77107	-132.022	-327.235		-207.937	-64.2988	-53.8308		68.6058	-5.6421	-4.113
-102.1	-28.6	-152.3		-39.2196	-197.793	-59.9225		-101.968	-129.403	-174.847		-29.7814	-57.3038	-61.4089
-102.1	-28.6	-152.3		48.0159	-244.249	-304.926		-116.872	-102.096	-25.7778		-23.9724	-6.73267	-62.7306
-102.1	-28.6	-152.3		-25.2234	-171.533	-51.6121		-155.579	-22.2629	18.9578		74.3884	-119.507	6.47701
-102.1	-28.6	-152.3		-99.6268	-158.572	-243.227		3.1216	-86.6547	-81.463		-74.0372	39.6156	-17.1731
-85.08	-28.6	-152.3		-31.6106	10.226	-103.325		18.5065	15.4714	-6.18035		4.39167	51.5868	-70.3209
-85.08	-28.6	-274.9		62.8994	-207.336	-333.542		48.267	-3.69609	-86.1071		7.66651	103.91	-29.0269
-85.08	-28.6	-274.9		16.6964	-131.107	-278.777		-110.975	21.3527	-52.3028		-26.5788	27.7444	-15.978
-85.08	-28.6	-274.9		-98.7505	-292.797	-182.23		-6.87685	25.4653	633.257		-6.20322	-77.8359	-90.8779
-85.08	-28.6	-274.9		-187.092	-123.997	-166.8		-134.789	-16.4867	235.602		-16.6225	-126.571	-35.5676
-85.08	-28.6	-176.7		-68.8408	-160.207	-309.04		-96.387	-43.8478	-53.3355		20.3984	30.9365	-9.85878
-85.08	-28.6	-176.7		-115.982	-213.714	-186.438		-92.0695	37.1354	4.09788		1.69851	-33.141	1.89709
-85.08	-28.6	-176.7		14.661	-148.328	-81.117		9.47706	-33.3827	50.2213		-8.48278	60.9573	-55.0539
-85.08	-28.6	-176.7		-188.572	-384.867	-290.84		-261.634	-134.889	-63.1889		42.2042	-124.774	-52.6412
-29.55	-28.6	-176.7		-237.442	-189.888	-309.712		-158.054	27.1494	-113.917		40.0388	68.4535	23.1756
-29.55	-28.6	-176.7		-119.61	-295.235	-225.251		-47.4682	-125.672	114.884		-1.72924	-37.9404	-30.2102
-29.55	-28.6	-176.7		-4.76104	-281.403	-277.566		-140.292	-143.297	15.6353		39.5848	36.5193	-79.2108
-29.55	-28.6	-132.3		159.563	-241.507	-193.116		-143.81	-65.6767	-195.142		-32.6062	15.418	-80.7332
-29.55	-28.6	-132.3		-46.1038	-135.022	-266.369		95.6812	-162.47	-18.2535		28.7835	36.062	5.81336
-29.55	-28.6	-132.3		-204.738	-89.4166	-245.88		10.7613	-14.9602	-128.171		28.5317	-11.2414	-43.9973
-29.55	-28.6	-132.3		72.7599	-203.088	-259.829		-159.566	-107.701	-14.1433		-38.1218	37.534	-95.7508
-29.55	-28.6	-132.3		-234.476	26.3129	-349.934		-186.262	-140.28	-46.6796		-36.8657	-64.8325	11.9595
-29.55	-28.6	-132.3		29.8142	-19.1267	-101.163		-205.073	-101.665	55.7137		-10.9853	-53.9647	-1.59021
-29.55	-28.6	-132.3		-143.371	-88.7274	-175.91		-293.342	-160.637	-68.7187		16.1364	-2.17719	-50.276
-29.55	-28.6	-132.3		-169.073	-112.321	-224.607		-163.915	-14.6465	-98.1261		-56.2855	-25.4183	-38.6414
-29.55	-28.6	-6.8		-215.181	-192.314	-293.443		-270.96	-43.5025	-106.204		39.0567	-71.8661	-10.1951
-29.55	-28.6	-6.8		-216.436	-209.718	-134.764		-167.128	-3.02547	-34.3975		1.19571	61.5224	2.16437
-29.55	-28.6	-6.8		-82.6721	-136.279	-261.151		-262.793	-33.2121	-88.6472		61.6905	-16.5121	-61.1074
-29.55	-28.6	-6.8		-23.4771	20.3768	-196.013		19.844	-116.431	209.651		23.01	144.266	59.0774
-29.55	-28.6	-6.8		-2.90399	-161.971	-360.262		-107.694	-130.844	-54.9155		-22.8663	-48.0273	11.0514
-29.55	-246.7	-6.8		-56.2422	-28.6744	-303.953		21.3918	-74.2855	-58.2025		-0.979608	-27.1894	-42.0139
-29.55	-246.7	-6.8		13.1463	-140.393	-229.798		53.5975	-183.254	-71.193		319.246	3.47841	-47.893
-29.55	-246.7	-6.8		-98.4024	-276.26	-311.289		28.9486	-176.714	-3.35308		14.7656	35.7971	22.4947
-29.55	-246.7	-6.8		-94.421	-24.4698	-255.906		-4.77677	-128.666	-49.7439		-6.1472	-17.0689	-34.5107
-29.55	-246.7	-6.8		-253.982	-124.835	-183.239		-176.455	-30.3768	-59.1566		31.3197	-30.4837	-23.2138
-29.55	-246.7	-6.8		-117.593	-295.215	-258.166		-125.019	-22.4767	100.592		26.8554	-14.8212	-28.7526
-29.55	-246.7	-6.8		-122.299	45.9858	-285.218		-197.767	20.9228	-21.0388		32.4005	-19.8437	-12.6495
-29.55	-246.7	-6.8		-154.902	-45.5959	-175.272		-121.965	-187.88	-47.9925		-31.6951	-62.5608	-7.86945
-29.55	-246.7	-6.8		45.3979	-228.205	-242.091		-295.027	-44.8694	-17.372		-40.5071	17.4813	-60.0814
-29.55	-376.8	-6.8		-38.591	-185.603	-234.25		26.1328	-60.9304	-55.4233		19.8424	140.055	16.2056
-29.55	-376.8	-6.8		-67.9943	-92.9838	-230.679		-12.2893	-88.8426	-109.422		-33.3264	-86.805	-109.724
-170.16	-376.8	-6.8		22.9336	-129.928	-202.991		-284.724	49.1932	-98.7689		9.78865	-28.7602	-9.20806
-170.16	-376.8	-6.8		-52.323	-129.965	-308.574		-117.39	-83.5219	202.703		37.0098	-54.8272	-76.9932
-170.16	-376.8	-6.8		-175.445	-45.7597	-210.653		-115.656	-155.665	-76.5172		-29.7968	-4.5477	-39.6484
-95.72	-376.8	-6.8		-110.73	-316.261	-254.593		-136.919	-29.0842	-88.2477		85.3064	-90.1967	13.7354
-95.72	-189.4	-6.8		92.7508	-15.7887	-311.971		62.1478	-121.143	-101.324		15.3882	46.1155	-40.0425
-95.72	-189.4	-18.7		2.25945	-277.136	-232.016		-132.185	-44.9157	-72.714		-8.92108	-116.398	-94.6629
-95.72	-189.4	-18.7		-5.32008	-156.191	-352.488		24.9359	12.426	-30.5011		-11.3447	-12.2987	3.13791
-95.72	-189.4	-18.7		-142.93	-98.5278	-201.333		5.22507	52.9841	-68.27		38.7471	-55.0104	-18.9988
-95.72	-189.4	-18.7		-208.956	-6.99724	-357.751		-333.903	-11.9766	-37.4597		-19.9172	2.58423	126.481
-95.72	-189.4	-18.7		-302.31	10.0791	-97.6734		-186.004	-163.374	-60.0082		60.9246	-56.4143	32.0069
-95.72	-189.4	-18.7		-9.19681	-305.423	-201.313		63.1852	-60.6407	-17.2421		39.4022	-4.31089	-22.0982
-95.72	-189.4	-18.7		225.068	74.7969	-366.363		-84.2889	-106.398	-12.5111		1.19914	-51.8109	-19.6157
-95.72	-189.4	-18.7		-126.872	28.1578	-216.312		-92.9434	-107.589	-68.0935		5.49349	-32.22	30.7493
-95.72	-139.2	-18.7		68.2442	-0.332049	-207.194		-75.6026	-219.632	-74.8837		-2.36407	-15.8708	-15.782
-95.72	-139.2	-18.7		-70.245	19.2657	-106.729		-165.77	-29.8887	-42.7705		-16.6421	-40.402	-85.8445
-95.72	-139.2	-18.7		-12.1426	-295.423	-270.757		-34.1557	28.7804	77.6148		56.386	20.5511	4.46217
-95.72	-340.3	-18.7		-239.468	-310.964	-185.218		-167.576	-20.663	-34.9068		26.3919	-50.3919	18.0711
-27.35	-340.3	-18.7		-77.3207	-112.503	-336.098		-147.501	16.2961	-78.9359		-35.1825	-57.8773	-53.695
-27.35	-34.8	-18.7		-287.929	-168.74	-134.739		47.2893	-48.0914	-131.762		34.6386	-76.1872	-8.30263
-27.35	-34.8	-18.7		-174.227	-47.4693	-99.586		-136.019	-58.9134	-40.4062		17.2148	-88.689	-50.7868
-27.35	-34.8	-18.7		-31.3445	-402.668	-313.892		26.3086	0.425574	6.24514		-20.8779	-49.8902	-64.6426
-27.35	-34.8	-18.7		-311.425	-269.578	-92.7313		-273.319	-118.88	-60.5279		-9.90089	190.368	-51.857
-27.35	-34.8	-18.7		-152.174	-85.7201	-293.861		-52.6267	-84.9503	221.138		52.4251	-49.6528	-36.9025
-27.35	-34.8	-18.7		-85.2542	-111.092	-96.4362		28.9198	-152.133	16.1594		38.9497	-26.5478	-45.2847
-27.35	-191.4	-18.7		-87.2304	-147.443	-335.97		-148.824	-71.4584	-46.4038		-38.9906	-41.1903	-62.0627
-27.35	-191.4	-18.7		245.643	-196.612	-60.687		-31.1232	9.41626	4.50295		-22.0184	-30.6601	-38.5254
-27.35	-191.4	-18.7		535.471	-119.79	-172.709		-221.767	-222.442	217.446		22.5368	-24.391	10.2302
-27.35	-63.8	-18.7		-6.00893	-283.762	-176.997		-319.136	-31.1813	38.3533		-62.7824	21.6423	13.2581
-27.35	-63.8	-6.9		65.9593	35.7826	-350.462		37.7227	5.63737	-31.3205		45.8511	-106.719	-114.342
-27.35	-63.8	-6.9		-117.078	-96.5011	-252.762		-37.9132	-186.847	-101.694		44.6076	-72.8909	-27.1512
-27.35	-402.7	-6.9		-74.3386	-187.457	-35.7329		-16.7064	-42.2085	-46.5683		25.9381	4.70363	2.67111
-27.35	-402.7	-6.9		-193.396	-269.149	-163.995		-182.361	-100.79	-32.8402		27.9915	-47.6423	-67.2115
-27.35	-402.7	-6.9		49.012	-270.372	-126.835		-129.593	-133.821	-3.7708		18.7304	-127.132	-53.1838
-141.8	-402.7	-6.9		-233.686	-249.039	-293.56		-149.697	-67.9305	-62.4065		-37.5992	67.9096	-57.2722
-141.8	-402.7	-6.9		-181.865	-194.052	-87.333		-186.995	-174.528	-71.3464		49.1518	-106.286	-14.4118
-141.8	-402.7	-6.9		228.899	-354.274	-107.583		-291.775	-280.573	-127.581		20.4921	-40.6843	11.4824
-170.16	-402.7	-6.9		199.305	-199.678	-131.566		48.4817	95.9953	-47.2959		55.6006	-35.7304	37.7094
-638.11	-402.7	-6.9		-12.3337	-103.001	-177.725		16.0607	-37.6629	-115.249		63.046	-62.906	-67.6761
-638.11	-402.7	-6.9		-12.5483	-148.369	-206.664		-33.6312	-61.2046	-98.7514		-33.6594	-68.9203	-22.8201
-638.11	-402.7	-6.9		-37.4117	-70.2255	-151.646		-136.246	-83.8856	-19.1264		56.5153	-34.0715	-67.5057
-638.11	-402.7	-6.9		-217.876	-298.742	-369.484		34.0259	-4.5195	-29.7475		32.8905	-33.8718	-97.1021
-638.11	-402.7	-6.9		-74.6944	-29.0762	23.8755		-50.0637	-215.697	-30.332		-57.0517	-29.0492	-18.9519
-638.11	-402.7	-6.9		-152.372	-223.099	-104.243		-65.7559	-10.7347	73.0609		29.6014	-23.299	-52.4497
-11.78	-297.8	-6.9		164.014	-69.2338	-153.973		-56.792	-100.301	202.439		-1.28357	-112.185	-31.6614
-11.78	-297.8	-6.9		-16.2641	36.2407	-233.164		-71.4732	-55.5542	298.154		-35.0011	-11.8506	-4.59561
-11.78	-297.8	-6.9		31.7861	-228.475	-335.957		-105.475	-12.6277	10.5603		-8.46038	-4.5776	12.7027
-11.78	-95.7	-6.9		-26.7253	-322.453	-125.053		-68.5969	-58.4012	-108.911		34.4559	-22.1076	-63.6839
-11.78	-95.7	-6.9		-102.798	-35.8588	-218.917		-171.045	-17.2215	-88.915		10.9382	-43.9837	-20.2904
-11.78	-518.2	-6.9		48.2394	-220.801	-357.695		-328.556	-162.691	-39.8704		-29.8075	12.0795	-21.8792
-11.78	-518.2	-6.9		-351.268	-149.386	-362.885		20.582	-262.128	-116.688		56.4098	-31.4625	-36.6031
-11.78	-518.2	-6.9		0.465423	-55.5691	-237.331		-234.747	-123.654	-42.421		-53.5594	63.9688	-70.2058
-11.78	-518.2	-6.9		-129.527	-20.3674	-164.312		-120.595	-91.1712	-31.1282		2.23577	-49.8424	-26.7786
-11.78	-518.2	-6.9		38.4756	-8.16385	-324.286		0.523142	-43.5367	-73.6256		-4.76948	-20.901	-4.89443
-11.78	-518.2	-6.9		-208.38	-319.702	-150.959		-5.98312	-57.1248	-15.0698		-89.4021	-82.5216	-24.7137
-11.78	-518.2	-6.9		-149.102	-232.548	-279.536		-8.54652	-54.1518	-83.4833		29.3557	-22.3715	-28.5126
-11.78	-518.2	-6.9		-60.508	-233.567	-82.8477		121.03	-62.7654	99.1883		11.4761	-47.0711	-5.26556
-11.78	-518.2	-6.9		-176.099	-75.6437	-165.778		-153.637	-15.4549	200.167		61.1114	-110.76	-21.9983
-11.78	-301.7	-6.9		-60.0121	-273.097	-207.661		-144.029	-130.885	-91.0265		81.5178	14.5135	23.7364
-11.78	-301.7	-6.9		-235.937	-318.255	-233.284		-190.08	-74.8158	-93.3545		-78.4237	-23.2724	78.4631
-11.78	-301.7	-6.9		-112.679	-305.008	-294.369		-361.549	-120.269	-49.5118		12.543	-76.7361	-82.1007
-11.78	-489.2	-6.9		68.9581	-275.723	-310.84		-105.49	-50.2135	18.4314		6.88565	-51.6112	-12.1993
-11.78	-489.2	-6.9		-97.1602	-307.34	-237.158		-183.425	-132.713	-112.108		-13.5738	-76.3712	-24.9484
-11.78	-489.2	-6.9		-48.6376	-216.43	-230.899		-249.02	106.941	-7.43887		16.0165	-94.7533	-35.5977
-11.78	-56.7	-6.9		-147.887	-243.89	-191.447		-187.268	-59.6926	-64.3457		72.0971	24.3985	-146.276
-11.78	-56.7	-6.9		20.8572	-75.3411	-166.418		-189.087	76.9699	61.5518		46.1763	-26.7708	-18.3833
-11.78	-56.7	-6.9		-128.363	-60.9401	-214.676		-155.891	-51.9945	225.719		-14.7216	-82.4589	-7.1396
-11.78	-255.2	-6.9		-131.628	-81.7979	-358.698		23.3858	-99.134	-87.0694		34.3178	10.7189	-24.7264
-11.78	-255.2	-6.9		-119.686	-164.296	-84.5861		-40.5874	-245.793	18.2621		7.25237	-35.0383	-121.531
-11.78	-255.2	-6.9		20.271	-256.429	-204.974		-99.3082	-157.592	-98.6748		35.6011	-50.3709	-50.9274
-11.78	-382.9	-6.9		22.0129	-182.742	-202.23		-72.9506	-28.9454	-92.2669		16.8628	0.973615	-10.0299
-11.78	-66.6	-6.9		-12.5621	-255.199	-243.626		-140.824	-169.691	54.7471		25.6322	-33.5861	-114.292
-11.78	-66.6	-52.4		-133.788	-151.911	-231.228		63.8359	-80.5244	-121.905		22.9768	-23.2384	-40.2336
-11.78	-66.6	-52.4		56.3414	-129.398	-216.463		-220.754	-81.4608	-46.3578		27.5925	-9.28767	19.5294
-11.78	-66.6	-52.4		-28.3345	-195.433	-283.143		-56.5895	-179.24	-70.1337		39.0389	-37.7019	-6.54995
-11.78	-66.6	-52.4		-94.6174	-45.2313	-287.335		3.51156	-135.433	9.57295		-29.5896	-2.16809	-39.0443
-11.78	-66.6	-52.4		-245.97	-239.999	-392.349		-199.947	-108.679	-51.6214		-49.7304	-30.1107	-39.656
-11.78	-66.6	-52.4		-104.798	-27.2248	-148.917		-108.203	-78.5837	8.64076		-37.9506	-10.3972	-17.2697
-11.78	-272.3	-52.4		-38.1554	-59.4726	-171.579		-217.32	-115.494	2.95968		-36.7778	-15.9696	-25.5444
-11.78	-272.3	-52.4		-220.713	-78.5418	-229.93		-119.671	-34.2208	371.396		-28.5348	-17.5059	-45.5304
-11.78	-272.3	-52.4		-124.419	-219.226	-271.207		-207.716	-81.7561	-16.8792		-31.7073	-45.21	-14.4875
-127.62	-272.3	-52.4		-263.327	-127.201	-142.718		-189.483	47.7597	-52.7843		-19.3931	24.0154	-56.5061
-127.62	-15.6	-52.4		-202.49	-87.4455	-302.004		-178.292	-70.8973	-48.3335		40.3553	-15.1243	-20.479
-127.62	-15.6	-95.7		-16.2214	-140.292	-282.076		-202.917	-242.299	-50.1075		-10.612	36.0032	-47.35
-331.82	-15.6	-95.7		-101.208	-28.7804	-238.988		-81.4237	-9.88355	-122.656		174.917	-75.2303	-28.9654
-331.82	-15.6	-95.7		-55.991	-280.675	-364.08		-49.8208	14.1484	-55.6374		16.7274	-17.8419	67.1135
-331.82	-15.6	-95.7		-213.286	-190.607	-205.138		-18.4724	-161.057	-60.7401		47.3626	1.07103	-9.98467
-510.49	-15.6	-95.7		-159.838	-205.756	-131.388		-397.936	-81.928	-10.9559		19.2522	-15.28	-86.2581
-510.49	-15.6	-95.7		-85.1365	38.6802	-189.849		-344.307	-95.8102	-29.8838		70.3643	1.43733	148.02
-510.49	-15.6	-95.7		65.111	-145.02	-194.649		-78.1307	-67.9839	-42.3599		35.0186	149.322	0.770274
-510.49	-15.6	-255.2		-305.781	-12.0505	-202.726		-80.844	-15.5275	-40.4457		60.74	-84.2969	-37.7839
-510.49	-15.6	-255.2		-148.667	-197.77	-203.231		17.0748	-136.496	2.9462		-64.088	17.0195	-11.6427
-510.49	-15.6	-255.2		-280.231	-71.0164	-244.682		-27.0144	-72.0131	-54.9144		-76.2402	23.9403	-22.2175
-6.38	-15.6	-255.2		18.894	7.11524	-321.23		-122.356	-10.5944	-11.8133		-5.55468	-52.211	-49.6417
-6.38	-15.6	-4.8		-178.63	-309.903	-193.164		-198.041	-42.1813	-56.573		18.6573	-38.752	95.2071
-6.38	-15.6	-4.8		-163.516	-204.776	-26.0329		-115.727	-25.6999	-14.6545		1.21442	-71.352	-28.3604
-6.38	-15.6	-4.8		-147.386	-40.6124	17.3338		-135.817	54.2012	-46.9339		-8.52465	11.1908	16.1098
-6.38	-15.6	-4.8		-177.201	-79.5138	-355.544		-150.024	-113.88	14.2032		-1.95005	-9.12998	239.144
-6.38	-15.6	-4.8		-80.1316	2.75114	-332.422		-185.887	-85.8765	-68.57		91.9862	38.2735	-81.2258
-6.38	-15.6	-4.8		36.809	-247.889	-303.398		-40.4618	-6.1071	-94.5193		40.6193	-109.162	0.939383
-6.38	-15.6	-4.8		-3.38701	-145.01	-318.122		-83.3309	17.5418	-62.4017		45.7508	-40.8758	6.58365
-6.38	-15.6	-4.8		55.7197	-267.371	-399.228		-94.3719	-36.3645	-83.4448		147.944	-51.5389	-42.1777
-6.38	-15.6	-4.8		214.508	-231.546	-148.658		19.7703	20.0722	9.88206		224.349	-37.5078	-72.8234
-6.38	-15.6	-4.8		11.8203	-154.714	-181.593		-132.975	-50.5118	12.0886		38.461	35.5332	-48.9781
-6.38	-15.6	-4.8		-242.912	73.9743	-34.5865		-143.005	-317.183	-93.2347		-51.6827	27.0451	-37.2861
-6.38	-333.8	-4.8		-172.974	-330.364	-253.251		47.5003	-82.1971	-75.7637		29.994	82.2867	-61.4068
-6.38	-333.8	-4.8		-250.819	-278.789	-182.259		-43.4188	-77.7122	-102.472		-52.3875	-92.0792	-80.9536
-6.38	-333.8	-4.8		-260.441	45.4561	-74.7923		59.8895	-99.3425	-20.5222		-29.9193	8.98108	0.224966
-6.38	-333.8	-4.8		-394.381	34.4023	-51.2987		-4.52166	-52.0523	-150.146		-0.386521	-83.6552	-34.6905
-6.38	-51	-4.8		-184.492	-329.324	-203.547		-139.208	-29.2272	-23.067		-19.7291	39.5875	-23.6768
-6.38	-51	-4.8		-86.1013	-214.114	-331.228		114.588	-61.4073	236.433		53.32	-67.9672	172.333
-6.38	-51	-4.8		-243.439	-103.875	-166.78		-93.5342	-88.1454	262.637		-2.33107	44.0759	-72.4765
-6.38	-58	-4.8		-374.513	-219.902	-57.3523		-20.0537	-90.7182	-55.6987		-10.9996	14.5408	-64.8547
-6.38	-58	-4.8		-93.3154	-45.4003	-345.168		-353.814	-200.931	-19.4863		65.9366	7.16926	-15.6691
-6.38	-58	-4.8		140.2	-160.506	-147.059		-273.352	-92.9816	471.492		-4.6153	-9.3403	-46.7445
-6.38	-58	-4.8		-155.6	-193.614	-170.131		-183.233	-63.32	-25.908		9.91698	26.8417	-23.5185
-204.2	-58	-4.8		-128.257	-360.316	-131.317		-109.526	-113.108	-101.945		29.8846	-131.155	-46.0673
-6.9	-58	-4.8		-261.492	-126.742	-194.554		-141.142	-132.95	-70.4388		-18.3186	-13.0745	-28.0449
-6.9	-5.8	-4.8		-359.642	-157.485	-177.26		31.8823	-37.1456	-28.3844		55.8268	4.64642	-129.348
-6.9	-5.8	-4.8		-274.869	-206.777	-165.854		16.7381	-222.879	-74.8073		12.6261	-20.3554	3.58457
-6.9	-5.8	-4.8		16.1041	-210.554	-175.674		-43.0019	12.6581	-78.8995		-31.0975	-118.797	-53.0209
-6.9	-5.8	-4.8		21.4035	3.70583	-179.404		-41.5329	-31.8663	-22.7983		-22.0567	-34.3426	-10.7799
-6.9	-5.8	-4.8		34.6626	-123.639	-214.391		-188.995	182.452	2.3578		-38.84	26.8702	-53.1101
-6.9	-5.8	-4.8		-56.468	-57.6568	-208.675		-3.47421	-10.943	-46.6309		28.4243	-28.8951	-65.4338
-6.9	-5.8	-4.8		-123.502	-50.3567	-246.438		-160.544	-175.121	-102.034		19.1956	-31.8537	-19.7537
-6.9	-5.8	-4.8		39.5356	25.2695	-209.336		-193.917	-138.048	-76.6542		-54.7939	40.7386	-49.2654
-6.9	-5.8	-4.8		-239.031	-121.091	-401.826		-181.202	-10.6382	-95.8993		-62.4967	-71.5416	3.22218
-6.9	-5.8	-4.8		-67.5859	-86.9665	-124.225		-48.8414	-186.792	-30.5867		45.9269	-32.8523	30.4815
-6.9	-5.8	-4.8		-194.219	-329.911	-290.039		-413.193	-39.3272	-72.5356		8.08273	-36.8828	-35.9979
-6.9	-5.8	-4.8		-124.57	-127.405	-281.128		-106.03	-110.974	-140.288		-60.2542	-52.9002	-37.021
-6.9	-5.8	-4.8		-278.836	-206.925	-197		-105.641	-45.8195	-13.1789		63.2039	11.8533	-37.0747
-6.9	-5.8	-4.8		-269.771	-53.8805	-364.46		-109.037	-55.0697	-72.5712		-38.3952	33.1694	-22.9271
-6.9	-5.8	-4.8		-87.2855	-206.666	-195.671		-103.97	-111.4	-17.2724		-39.7274	9.43938	48.6625
-6.9	-5.8	-4.8		-94.1955	-140.243	-162.592		-303.771	-120.264	-16.8462		90.2491	-9.10161	78.9994
-6.9	-5.8	-4.8		-74.4705	-364.77	69.8896		-236.886	-74.4616	-26.3877		-19.9557	-65.2703	112.811
-6.9	-5.8	-4.8		-77.6008	-373.675	-315.943		-224.648	-125.129	-25.0218		53.3706	-6.90548	-43.421
-6.9	-5.8	-4.8		39.9823	-236.835	143.67		-294.268	-71.9431	-55.7074		90.6657	-42.685	-12.0182
-6.9	-5.8	-4.8		12.2169	-91.716	-4.39403		-240.726	-67.3067	-57.1135		5.13992	-36.9384	-53.1463
-196.34	-5.8	-4.8		-75.0287	-212.109	-163.708		21.796	-213.191	-33.8284		-54.2292	-55.7264	-7.12477
-196.34	-5.8	-4.8		59.5652	-163.733	-334.239		-41.5342	-166.613	-29.7057		22.6035	-0.101348	-43.0073
-196.34	-5.8	-4.8		42.4424	-73.3793	-92.4832		-203.748	-75.7073	-10.1845		-34.5246	1.42213	222.704
-196.34	-5.8	-4.8		-351.547	-148.182	-158.037		-279.27	-233.72	-13.8956		-81.9261	-71.7255	-15.4773
-29.17	-5.8	-4.8		-56.2473	-108.029	-80.7584		-188.315	-212.842	-94.0292		-50.135	-38.7481	-37.0812
-29.17	-5.8	-4.8		1.60848	-95.6284	-235.247		63.0246	-25.0738	-74.6216		48.4862	-84.5318	-12.8831
-29.17	-5.8	-4.8		-203.3	-165.764	-170.138		-77.7297	-101.878	-65.2809		-4.12767	38.6654	96.6016
-29.17	-5.8	-4.8		-52.8574	-162.038	-167.08		-90.5419	-97.1454	-100.85		-36.1023	-101.63	-15.3482
-29.17	-5.8	-4.8		-120.872	-115.489	-204.058		-35.3542	-87.7663	607.311		44.4187	43.6882	-27.7177
-29.17	-5.8	-4.8		-12.7039	-152.153	-177.761		-26.9794	-102.92	19.109		6.28364	-44.8702	-66.2581
-29.17	-5.8	-4.8		25.1213	-228.91	-95.8728		-231.268	-119.211	-50.5569		14.2351	-103.681	-35.864
-29.17	-5.8	-4.8		-181.253	-295.937	-255.078		27.5789	-190.451	128.886		-18.3452	-24.7594	3.68605
-29.17	-5.8	-4.8		53.9136	-14.765	-325.998		45.1459	-3.49471	10.4594		50.8174	-113.783	-9.35835
-29.17	-5.8	-4.8		-11.178	-296.345	-292.414		-183.23	-48.4054	-59.7733		21.6922	-52.3448	-8.26603
-29.17	-5.8	-4.8		-204.958	-33.5329	-173.728		-30.6692	-91.4944	16.7914		23.0491	-11.2563	-28.5668
-29.17	-5.8	-4.8		-221.696	9.67026	-111.366		-37.4804	-92.5287	-73.7272		11.7855	2.11032	13.2729
-29.17	-5.8	-4.8		16.8778	-92.1852	-213.086		-198.475	-73.4926	-86.6267		-36.8771	49.3249	14.9388
-29.17	-127.6	-81.7		-35.6606	-91.4707	-146.441		-86.9657	-73.8331	-97.8786		65.4707	-22.9057	-63.7509
-29.17	-127.6	-81.7		-132.824	-39.7751	-334.181		33.3872	23.103	-41.2788		-18.5312	-29.9429	-45.2689
-29.17	-127.6	-81.7		-91.5092	-230.537	-215.301		-265.862	-155.224	-33.6929		42.1249	-77.4219	-91.0987
-29.17	-127.6	-81.7		-39.6543	-288.456	-321.296		-194.195	-228.341	-35.7298		13.9248	1.9836	-63.4395
-29.17	-401.1	-81.7		-188.439	-256.471	-203.029		23.1388	28.695	-74.7696		36.2691	-50.1592	2.08328
-29.17	-401.1	-81.7		-60.2932	-174.693	-154.616		-54.7254	-214.912	-117.588		8.68192	-78.2312	-56.0567
-29.17	-401.1	-81.7		-51.0058	2.5907	-187.045		-30.7522	-57.0618	-115.125		53.2716	3.52868	-13.9523
-144.14	-401.1	-794.1		30.2449	-304.836	-116.79		61.1094	-5.86076	154		83.5098	12.3412	-37.9251
-144.14	-401.1	-794.1		-36.4024	-18.9992	-219.263		-41.8864	-58.5884	5.27828		-74.3999	-122.976	8.74855
-144.14	-401.1	-794.1		-88.5222	-28.2021	-132.885		-50.5643	-197.233	-63.6264		32.0841	0.707596	53.2916
-144.14	-401.1	-794.1		-96.2953	-11.4287	-351.737		-167.131	-115.369	-61.1494		26.5232	97.3294	-62.8224
-144.14	-401.1	-794.1		73.9038	-38.8417	-108.534		-101.702	-14.6113	228.52		51.2209	19.509	-110.691
-144.14	-401.1	-85.1		-155.194	-74.9009	-119.5		-127.167	-141.771	-56.1127		67.9866	-94.5315	-14.6658
-144.14	-401.1	-85.1		329.779	-289.869	-101.216		-213.16	-142.045	-68.3599		79.9085	-29.8821	-53.1703
-144.14	-401.1	-85.1		26.0475	-425.185	-199.658		-19.7498	-42.7472	-42.7348		20.2278	-7.28456	-19.9059
-144.14	-401.1	-168.1		-156.19	-178.953	-185.338		-46.8462	-115.484	-50.024		18.1553	-4.17095	-9.76447
-144.14	-401.1	-168.1		23.1508	178.934	-280.168		160.06	-119.652	-39.2725		30.9285	2.35506	34.4937
-144.14	-401.1	-168.1		-118.386	-150.979	-94.0361		158.342	-105.601	-117.537		29.295	13.0769	19.7493
-144.14	-218.8	-168.1		-178.736	-144.613	-111.095		22.1607	-20.9655	-55.2516		15.9255	-27.5798	-87.438
-144.14	-218.8	-168.1		65.1731	-174.91	-285.788		-118.719	43.7932	71.2588		46.178	-76.4254	-36.474
-144.14	-218.8	-168.1		-104.826	-182.507	-95.4121		-127.4	-35.8864	219.041		22.4291	3.31318	-60.0508
-144.14	-218.8	-168.1		6.21801	-138.952	-236.119		-78.7621	-179.601	-128.287		32.9461	109.184	-67.9353
-144.14	-218.8	-168.1		-263.549	-83.5379	-191.752		-25.3365	-6.19771	-91.4018		-23.3241	-76.7164	11.0598
-144.14	-218.8	-168.1		-44.7238	-167.751	-234.918		-99.4021	-203.701	4.89257		32.6481	-135.118	-48.7964
-144.14	-16.2	-168.1		-142.906	-176.762	-253.138		-114.052	11.0187	-89.8914		-2.04102	-36.3865	-43.3909
-144.14	-16.2	-168.1		-64.6364	-206.606	-337.792		1.71995	-236.927	-141.648		19.2757	-39.1975	-50.632
-144.14	-16.2	-168.1		-189.309	-10.8865	-83.5944		-294.081	-127.519	-44.7896		-39.177	-139.988	241.739
-144.14	-16.2	-20.7		-318.981	-240.785	-207.763		-140.317	-172.822	-69.3442		27.1538	-50.7147	39.2113
-144.14	-16.2	-20.7		-289.085	-351.903	-138.69		-49.5967	-171.352	-43.8366		26.486	-40.8352	-27.5793
-144.14	-16.2	-20.7		7.71458	-144.878	-238.457		-130.57	-70.3396	-26.4887		-15.1707	-5.40015	-44.8041
-144.14	-16.2	-20.7		-187.535	-145.8	-11.9173		-14.6889	26.6308	-106.777		8.13862	-53.6864	-23.8782
-306.29	-16.2	-20.7		-107.029	-82.1216	-237.11		-239.09	-151.463	-56.1139		12.731	-78.352	-60.0293
-589.03	-16.2	-20.7		50.8927	-26.4315	-163.853		31.5383	-10.2506	-112.548		10.9137	19.1292	-41.0645
-589.03	-16.2	-20.7		-251.164	-154.851	-122.121		-181.632	-55.2245	-36.6844		-19.9908	-18.1459	-18.9968
-589.03	-16.2	-20.7		-227.6	-137.645	-90.4757		-113.315	-134.401	-98.7912		2.14899	-68.128	-6.96369
-589.03	-16.2	-20.7		-73.5448	-51.3365	-154.005		-299.672	-100.043	-56.5111		42.7724	-29.2743	-57.4974
-297.79	-16.2	-20.7		-207.889	-213.33	-126.912		20.0969	-52.7745	-17.8641		3.80379	-17.7301	-60.2036
-297.79	-16.2	-20.7		-144.886	-163.323	-166.787		30.765	-160.757	-98.6831		62.7288	-47.8606	37.8462
-297.79	-16.2	-170.2		-95.1275	-99.1553	-265.412		-224.172	-19.4753	10.9779		26.1716	-18.8202	5.7025
-185.63	-16.2	-170.2		-2.16594	-259.915	-323.719		21.6226	-4.46773	-102.788		23.5599	-84.2984	-1.32827
-185.63	-16.2	-297.8		-125.423	-165.997	-228.981		-198.803	-60.8652	-32.5253		11.8013	-40.0371	-40.3466
-185.63	-16.2	-297.8		-248.59	-222.32	-154.055		94.4485	-121.011	6.10417		-8.10339	-43.4103	-79.755
-4.82	-16.2	-102.1		-109.287	-276.576	-168.249		-61.5077	-256.649	-66.2373		30.3546	5.80343	-92.8491
-4.82	-16.2	-561.5		-244.059	-116.05	-190.792		162.036	-2.395	-28.7687		217.509	-17.4752	12.9087
-4.82	-16.2	-340.3		-93.9266	-186.666	-78.0748		260.913	-117.982	-48.629		-9.94608	6.48194	-14.376
-4.82	-16.2	-340.3		-170.088	-247.697	-172.495		-153.837	-30.0441	274.263		-13.9975	-46.3598	-7.2779
-4.82	-16.2	-340.3		-27.7689	-249.269	-19.1604		-187.275	9.65138	417.148		73.4678	15.0631	-59.0154
-4.82	-148.9	-340.3		-271.109	-122.471	-206.275		-334.045	-68.1674	-62.8193		-49.9822	30.9227	-7.16257
-4.82	-148.9	-340.3		43.9105	-205.861	-177.763		20.5654	-101.397	-69.3278		-95.2969	-37.4301	-89.1889
-4.82	-148.9	-340.3		-233.812	-102.1	-165.688		-161.741	-175.359	106.475		20.1338	-41.1065	-31.0449
-4.82	-820.4	-340.3		-138.429	-124.306	-352.883		7.51977	-104.11	14.8141		26.8551	-21.5062	-37.7063
-4.82	-820.4	-34.8		-194.463	-194.143	-330.514		-27.1634	-9.37229	-170.068		-77.9937	-46.3654	-2.20274
-4.82	-820.4	-34.8		-205.896	-83.0834	-3.00237		-50.164	10.3541	218.481		-11.2621	36.8828	101.123
-4.82	-820.4	-34.8		-187.443	-395.182	-286.178		-22.153	10.167	160.483		87.0833	-30.8586	-76.9143
-4.82	-299.6	-34.8		-196.579	-290.131	-417.674		-255.999	-23.5873	-19.8134		104.213	26.2999	-57.2078
-4.82	-299.6	-34.8		-131.423	-48.5704	-110.149		-132.037	-163.131	-13.8767		-19.5151	54.0609	-20.5163
-4.82	-299.6	-34.8		-268.351	-227.672	-336.868		-222.378	-35.2069	-80.6767		-41.5021	24.2757	-37.1998
-4.82	-299.6	-198.5		-117.8	-60.1991	-135.839		-300.476	-69.9543	-25.1015		-4.06366	-78.5473	-42.3361
-4.82	-299.6	-198.5		-54.8721	-117.42	-203.235		-237.335	-58.0463	-95.9095		-15.8375	-33.5108	-5.12817
-4.82	-299.6	-198.5		-68.5646	-153.525	-124.194		-222.689	-136.442	-25.1573		-8.88472	-47.196	-53.8208
-4.82	-299.6	-198.5		-36.3413	-203.12	-211.404		-103.57	-51.9618	-42.2973		34.3387	-73.6831	167.929
-4.82	-15.5	-198.5		-37.1208	-206.093	-148.377		-161.569	-20.7533	-12.4644		20.3414	29.8381	533.278
-4.82	-15.5	-105.6		-57.7101	-114.922	-143.839		-186.329	-47.3618	7.43539		50.631	-85.6461	15.6407
-4.82	-15.5	-105.6		-186.241	28.1951	-261.05		166.08	-141.285	-56.6259		69.847	2.60276	306.305
-4.82	-15.5	-105.6		-100.889	-304.699	-86.9956		-1.38123	-66.1283	-86.9934		7.7699	-39.6228	-50.1588
-4.82	-15.5	-105.6		54.4448	-64.4501	-100.962		-173.251	32.9305	-65.3308		-26.9565	-106.06	-3.78981
-4.82	-15.5	-105.6		36.2933	-383.546	-151.529		-77.6056	-94.8826	-58.1496		-40.8048	-61.4219	-25.0157
-4.82	-15.5	-105.6		-99.7282	-35.0255	-284.504		-320.701	-35.31	-67.8287		3.39024	-89.7297	-22.715
-4.82	-15.5	-105.6		-6.96804	-117.747	-86.382		-64.903	-146.885	-24.6231		23.3565	-7.83877	115.032
-4.82	-15.5	-105.6		48.0567	-43.9618	-220.189		50.2081	-26.7067	-161.713		20.1821	-29.8486	39.6112
-4.82	-368.7	-105.6		-42.712	-278.001	-324.059		49.673	-117.351	-75.1165		-12.0945	-17.5525	-42.6409
-4.82	-368.7	-105.6		-46.8364	-171.257	-235.672		-20.4536	-195.789	2.91028		12.9321	-39.6882	-48.2582
-127.62	-368.7	-105.6		26.7602	34.8155	-261.665		-27.0548	4.10512	-15.4292		22.3325	-29.3605	-53.4196
-127.62	-368.7	-105.6		-218.494	-161.048	-236.686		-367.763	-192.365	-64.2756		17.0384	-27.2633	72.3629
-85.08	-368.7	-105.6		12.2209	-191.466	-168.967		45.8303	-101.081	-88.2048		-29.5385	-72.4782	-4.18281
-85.08	-368.7	-105.6		-148.766	-64.5461	-309.177		-39.9478	-41.3502	-166.185		-26.8924	-49.0051	-104.546
-48.62	-368.7	-105.6		65.4894	-238.82	-193.102		-169.854	2.57898	-79.6755		8.66973	-73.4478	-35.8372
-48.62	-368.7	-105.6		5.13785	-148.12	-179.983		-201.012	-33.0262	-105.631		-40.0035	67.2323	-51.8454
-48.62	-31.9	-105.6		-212.872	-226.284	-224.127		75.0332	-85.2058	-96.8532		42.4184	-57.4438	-26.3716
-48.62	-31.9	-92.3		-171.922	-104.828	-265.755		-348.934	-66.2176	-24.525		40.1644	18.1494	-28.8514
-48.62	-31.9	-92.3		58.5071	-131.354	-266.919		-298.142	-67.2021	-26.982		8.38962	-22.6148	16.3522
-48.62	-31.9	-92.3		-81.0571	-77.9139	-183.108		-244.126	-45.0393	-16.2706		16.39	-82.0452	-43.8233
-53.18	-31.9	-92.3		-400.955	-261.276	-194.1		-117.816	-167.924	0.0393049		211.209	-0.552469	-52.6239
-53.18	-31.9	-92.3		-36.9553	-53.939	-208.874		-129.841	22.4755	-58.2284		43.8683	-17.8264	-25.663
-53.18	-31.9	-92.3		-128.059	-218.472	-83.0081		-243.055	-139.869	-77.7364		8.66041	-16.0643	-47.8696
-53.18	-170.2	-92.3		-7.27127	-211.383	-46.2229		2.58322	-92.6472	-121.996		-14.359	17.2924	-10.8192
-53.18	-170.2	-92.3		-25.6604	-289.508	-188.027		-19.2852	-93.3415	-24.4105		-121.421	-56.4534	-67.4208
-53.18	-170.2	-92.3		17.3621	-95.3372	-133.326		-200.442	-77.5003	-84.6855		-22.2927	-99.977	-19.0603
-53.18	-170.2	-92.3		36.1889	-201.021	-247.022		11.4408	-90.9126	-7.83963		0.051438	-23.5785	-52.2024
-85.08	-170.2	-92.3		-12.2155	-106.043	-218.265		32.224	21.8461	-55.7747		14.393	-110.477	234.26
-85.08	-647.9	-92.3		-169.957	-167.715	-196.746		-21.3618	-193.951	-68.8583		53.9747	-77.3371	5.88352
-85.08	-647.9	-92.3		-286.141	-92.4846	-214.719		-119.371	-134.263	-104.644		-63.507	40.7667	298.266
-85.08	-647.9	-85.1		-49.5716	21.5728	-449.6		-81.0919	-95.9745	31.7159		25.8645	-144.599	-106.355
-45.04	-647.9	-85.1		-25.3149	-1.16195	-210.048		-398.868	-90.6289	-46.2263		-27.6873	42.2923	-14.7978
-45.04	-558.3	-85.1		-238.154	147.445	-163.215		64.3567	-274.755	-75.2038		100.883	-42.0338	-62.616
-45.04	-558.3	-85.1		-194.877	-252.288	-5.15091		-94.7131	36.7632	-75.7994		26.479	-25.6025	-17.3779
-45.04	-558.3	-85.1		-203.591	-264.213	-405.373		-149.803	-110.32	152.753		-8.23443	-137.352	-63.1227
-45.04	-558.3	-85.1		-2.96369	-212.406	152.059		-231.132	-148.637	13.8608		-65.1643	-50.2178	-13.264
-14.5	-558.3	-85.1		-47.0786	-330.124	-170.139		-356.613	-189.389	-84.009		4.01337	-16.3037	13.5795
-14.5	-765.7	-85.1		0.946178	-202.346	-174.333		-232.144	-142.24	-28.0882		-1.08513	-56.284	-27.3293
-14.5	-765.7	-85.1		-132.542	-131.673	-221.152		-236.587	-75.9323	-87.519		423.611	-45.9738	-112.43
-14.5	-765.7	-199.2		-39.027	-100.258	-299.431		-114.207	-137.438	11.8072		5.02901	-22.3489	-25.6164
-14.5	-765.7	-199.2		37.2258	-105.83	-277.965		-24.5373	3.34519	-90.9778		2.5561	-33.0805	-27.3947
-14.5	-765.7	-199.2		-22.401	-216.616	-245.755		-77.8519	-26.1233	-40.4102		12.8591	-7.44547	-103.653
-14.5	-765.7	-199.2		-105.92	-301.176	-160.867		-151.318	-17.1471	-63.2621		29.0661	-92.4684	-39.606
-14.5	-654.1	-199.2		-9.16895	-141.973	-168.214		-153.99	-53.7936	-34.2325		17.2727	-54.833	-19.4546
-14.5	-654.1	-199.2		-126.953	-175.417	-159.575		-4.63983	-231	-92.8539		1.35773	-4.79158	2.88676
-14.5	-654.1	-199.2		-276.928	-222.808	-222.583		-431.413	-111.074	-93.4227		21.6779	31.08	8.36182
-14.5	-654.1	-199.2		-83.8127	-283.839	-206.78		-23.2411	-121.482	-115.431		0.97052	-1.69147	-32.567
-14.5	-654.1	-199.2		-60.6641	-249.734	-58.367		-109.188	-114.303	-100.243		32.0133	-91.6505	106.054
-14.5	-82.2	-199.2		-307.374	-169.318	-88.1493		-131.423	-116.73	3.94779		-0.78282	-39.0436	101.853
-14.5	-82.2	-199.2		-129.537	-147.051	-148.226		-242.516	-148.411	-126.57		16.5053	-112.464	-36.4182
-14.5	-82.2	-199.2		43.9291	-93.7861	-258.008		-93.867	-126.056	-70.8656		40.4645	-60.0642	-63.0312
-14.5	-82.2	-652.3		-234.491	-237.912	-191.84		62.6728	-40.4951	-27.1113		49.633	-79.1508	1.90673
-14.5	-82.2	-652.3		52.453	-179.22	-273.85		-367.041	14.4769	-101.53		-53.0143	-42.1398	41.8166
-14.5	-82.2	-652.3		-209.313	-132.896	-276		-273.844	-38.9832	-93.5179		37.867	-65.1332	-66.0243
-14.5	-82.2	-140.8		25.9171	-228.557	-107.957		-128.871	-54.1371	-157.82		-110.384	-35.3617	41.3482
-14.5	-82.2	-140.8		6.03096	-235.725	-210.592		-152.432	63.632	-103.735		-15.4051	56.9575	-31.5518
-14.5	-82.2	-140.8		-132.083	-76.3316	-108.848		251.48	-14.3924	-92.0571		3.86606	-86.4389	-102.565
-14.5	-82.2	-140.8		-139.155	-179.017	-250.032		-161.241	-136.149	-28.9462		-8.12205	-24.793	4.38137
-14.5	-82.2	-140.8		-24.5096	-168.073	-115.27		-301.322	-66.8918	5.98359		218.192	101.36	-77.3925
-14.5	-82.2	-140.8		-157.67	-278.278	-17.1422		-82.516	-6.81843	-52.3891		-61.6174	-57.078	-12.2872
-14.5	-82.2	-140.8		-265.345	-136.462	-154.603		-36.0827	-23.4991	-66.3866		-4.68706	-50.5289	-25.6932
-7.85	-82.2	-140.8		-78.0719	-54.3676	-310.158		-248.135	-2.22906	211.429		85.3203	-29.8985	-88.8472
-7.85	-82.2	-140.8		-104.844	4.72584	-271.422		-109.784	-59.0842	-73.1465		41.2552	-64.4191	-1.07553
-7.85	-82.2	-140.8		-227.109	-164.111	-85.1499		-168.392	-51.6246	-79.9807		45.0922	-12.863	-7.50658
-7.85	-82.2	-140.8		-113.587	12.2018	-92.3151		-337.035	-94.6005	-50.7274		113.542	-61.227	-16.3543
-7.85	-714.7	-140.8		-114.246	-254.538	-259.736		-171.298	-92.185	-11.2475		9.11169	4.3709	-1.34492
-7.85	-42.5	-140.8		-148.944	-187.361	-97.7265		-97.6962	64.9838	-98.0278		-13.2	14.6079	11.9577
-7.85	-42.5	-140.8		-240.976	-88.1152	-178.703		-362.515	-67.4383	440.023		2.65701	-39.9902	-102.966
-7.85	-42.5	-140.8		-239.147	-89.9658	-120.634		-41.5455	-130.566	175.232		5.27552	-16.0211	-36.6522
-7.85	-42.5	-140.8		-159.182	-379.253	-174.353		-8.34665	-61.6408	132.93		3.66373	-76.0461	-40.1651
-7.85	-42.5	-140.8		-10.2829	-65.4176	-157.961		-35.7468	-1.02885	-41.7614		-62.4702	268.524	-42.4456
-7.85	-875.1	-29.3		-86.8672	-45.207	-173.613		-48.0128	-216.088	-2.42289		-13.6065	-20.7929	-46.6948
-7.85	-875.1	-29.3		-156.444	39.8577	-209.418		-175.8	-70.24	-30.7322		33.5369	-103.807	-78.0217
-7.85	-437.6	-29.3		14.4085	58.545	-244.359		-29.4046	-60.0937	-163.158		1.1857	-44.1857	-8.27623
-7.85	-437.6	-29.3		37.4026	-51.6314	-203.566		-81.1494	-40.226	-41.2574		188.704	-69.2642	-4.99752
-7.85	-177.3	-29.3		-100.262	-267.734	-39.1124		-259.285	-58.7083	-2.49473		340.854	-75.7427	88.0974
-7.85	-177.3	-29.3		33.5456	-353.295	-162.486		-249.448	-130.304	-60.8001		26.2794	50.064	56.3353
-7.85	-177.3	-29.3		2.38618	-274.141	-11.9229		-165.832	-277.526	-113.258		43.944	-50.591	-4.29635
-7.85	-177.3	-29.3		-267.289	-156.608	-283.075		88.7074	-75.3618	-66.3568		-34.7775	-38.7299	-46.2683
-7.85	-177.3	-29.3		-123.75	-88.5107	-153.884		45.7377	-170.394	-40.3122		-54.7752	-44.5448	-28.1793
-984.52	-177.3	-29.3		-281.09	-73.0771	-267.133		-142.02	-90.2147	18.9726		-13.9147	-88.5732	-28.7486
-984.52	-177.3	-29.3		-9.77636	-178.076	-173.465		100.298	-191.66	-96.5219		18.3197	-17.7869	-56.9314
-425.41	-177.3	-29.3		33.783	-192.417	-183.868		67.3037	-64.0478	-32.8733		-43.6394	-10.7693	-51.8694
-425.41	-177.3	-29.3		-178.754	-328.116	-142.396		-294.479	-19.2471	-28.6189		-6.36706	25.4216	9.47733
-484.97	-177.3	-29.3		-125.037	-209.996	-66.9807		-83.4103	-39.1893	-96.1347		68.7827	-30.3882	-21.5227
-484.97	-113.4	-29.3		-143.29	-236.833	-244.81		-29.1145	-28.7651	1.65942		-67.824	-81.7482	-63.7624
-484.97	-113.4	-29.3		-108.782	-110.337	-65.5385		-37.6057	-44.588	-117.864		18.3283	-111.297	471.731
-484.97	-113.4	-29.3		-52.1639	-22.717	-260.302		-94.9332	-143.224	-12.4991		26.083	-82.6623	-3.96107
-484.97	-113.4	-10.9		-62.2532	11.4853	-162.13		-102.739	-45.7963	-70.6635		31.9874	-42.0732	-118.884
-484.97	-113.4	-10.9		20.818	-154.529	-266.434		74.9341	-16.2749	-20.4921		7.2846	-20.1015	-41.6141
19.63	-113.4	-10.9		-244.911	-324.433	-466.074		-219.737	-144.065	-92.797		2.53277	-8.60997	0.687758
19.63	-113.4	-10.9		-119.302	-271.794	-162.496		-27.8503	38.9936	-127.021		19.6411	-55.6419	11.5481
19.63	-113.4	-10.9		-213.49	-300.246	-260.31		16.7665	-92.3137	-32.0415		-29.7774	-1.51166	-18.5354
19.63	-91.9	-10.9		-124.512	-93.8332	-63.5719		-140.465	-125.568	-44.404		79.6259	-43.2623	-46.0965
19.63	-91.9	-10.9		-175.398	15.5033	-353.074		-279.511	-225.953	17.3344		-84.981	2.70417	-54.3477
19.63	-91.9	-10.9		5.9974	81.5139	-336.867		14.6677	-157.405	-74.8342		92.4297	-42.8677	-3.19056
19.63	-91.9	-10.9		-139.106	-93.962	-201.46		56.2059	-115.037	-78.572		28.2902	-59.2123	-77.7362
435.42	-91.9	-10.9		-307.355	-304.797	-223.473		-105.253	-88.891	-5.94655		-34.0141	-55.8707	-39.9319
435.42	-91.9	-10.9		-135.818	-51.033	-431.843		21.548	-15.4665	0.502062		-34.8361	-2.72012	-44.256
435.42	-91.9	-10.9		-109.614	-138.879	-172.066		-26.7515	-152.857	-63.6166		73.4508	-43.3153	-7.49975
435.42	-85.1	-10.9		176.821	-208.608	-229.673		-362.132	18.2608	572.258		-14.9519	57.8315	-37.8416
435.42	-85.1	-102.1		-210.8	36.7646	-251.168		2.10021	-21.4658	-38.3595		49.429	-45.2482	-68.3588
530.12	-85.1	-102.1		76.5845	-21.9526	-102.271		-152.149	-40.6171	-67.3317		-49.428	-62.1402	-21.5734
530.12	-85.1	-102.1		157.272	-55.4008	-157.595		-178.441	-142.838	-71.2964		24.6265	-8.95168	-80.5763
530.12	-85.1	-15.3		167.765	-233.528	-278.739		82.2365	-21.8832	-10.483		9.09045	-25.9401	-33.7273
530.12	-85.1	-15.3		31.3018	-182.863	-155.524		11.7273	-27.0147	-11.7137		-14.6224	-25.4053	6.78458
204.2	-918.9	-15.3		-84.3728	-119.779	-138.14		-287.396	-138.544	-41.1584		-13.7058	-37.3617	26.0831
467.95	-15	-15.3		-216.186	-132.77	-231.426		-150.445	-105.88	-139.627		25.0718	-84.1773	507.818
467.95	-15	-15.3		-22.3209	-172.348	-176.652		-81.9272	-173.692	-70.1227		11.0543	-46.526	-85.543
331.82	-15	-15.3		-115.567	10.3924	-203.524		-270.958	-76.4739	-85.1337		-24.5966	30.1173	8.44434
331.82	-15	-15.3		28.2047	-138.376	-191.52		-46.2061	-88.5473	-79.9322		-10.512	-35.852	-2.29304
331.82	-15	-15.3		-149.576	-30.8852	-284.493		-132.7	-99.6342	-78.8687		62.6229	-3.52739	25.2451
24.9	-15	-15.3		-258.371	-262.458	-272.912		-66.3405	-64.4158	-83.0956		42.573	-17.4382	-54.3807
24.9	-15	-15.3		-50.0695	-106.645	-322.069		-72.9838	-7.18275	18.7359		38.4895	-10.0198	446.134
24.9	-15	-15.3		-151.656	-134.137	-449.346		-1.94347	-153.354	-61.7762		-43.7975	-30.0354	-56.952
24.9	-15	-15.3		-9.58681	-89.0061	-137.436		-219.909	-43.589	-56.4456		86.1678	-6.33479	19.4183
24.9	-15	-15.3		-385.274	14.3259	-230.69		-117.527	-166.917	-168.022		-7.15842	-90.019	-42.1924
24.9	-15	-15.3		-297.894	-199.675	-271.309		-58.4457	-132.449	-71.3227		18.378	-30.9037	-32.1083
24.9	-15	-15.3		-96.4676	-119.151	-286.792		-202.07	-295.12	151.376		32.4665	-3.71828	-25.7382
24.9	-15	-15.3		46.5053	-272.951	-183.099		13.2938	11.6283	12.6996		-102.88	-48.8552	-83.8407
24.9	-15	-15.3		-85.6318	-174.582	334.449		-188.08	46.0354	-20.6532		-10.815	-67.9049	-5.33906
24.9	-15	-15.3		63.8766	7.62429	412.876		-167.1	-123.878	-34.3939		18.3025	9.74916	-50.4335
24.9	-15	-15.3		-130.983	-103.209	-173.185		35.2739	-58.5346	-84.3949		7.68277	-50.782	-86.2783
24.9	-15	-15.3		-287.819	-298.774	-133.829		19.9899	21.2199	-38.9338		-24.1942	-32.2219	-76.8106
198.52	-15	-15.3		-173.954	-382.834	-158.165		-111.066	-98.2214	24.0874		34.831	-11.9855	-5.64011
198.52	-15	-15.3		-88.6957	-225.876	-70.4129		-326.34	131.952	38.6632		48.3777	-73.6095	-78.0368
198.52	-15	-15.3		-188.375	-49.8226	-430.471		-155.406	-91.0814	-185.398		24.2106	-18.0046	-48.6992
382.87	-15	-15.3		-275.541	-214.88	-25.1545		41.0821	-3.77274	-37.9589		-48.4569	-24.6946	-28.5237
107.04	-15	-15.3		-21.1074	-203.562	-189.495		45.7168	34.2342	-32.6653		25.7227	-24.7604	-20.886
107.04	-15	-15.3		-95.4142	-171.215	-275.953		32.6781	-143.663	-47.3476		32.2336	53.0494	-82.4433
107.04	-15	-15.3		-22.5483	-214.321	-401.41		-11.2068	-120.323	-87.9627		-7.78431	-82.0336	7.76368
107.04	-15	-15.3		-155.55	-341.887	-330.929		-73.8761	178.727	-97.2356		-95.9257	-12.7612	-37.3127
107.04	-15	-15.3		-13.6715	-16.8754	-256.266		-100.537	-72.9858	-144.939		13.6389	15.1765	4.64257
107.04	-15	-15.3		-300.722	-230.821	-125.372		-48.8313	-21.8965	-128.097		-107.486	-65.9219	-21.6631
107.04	-15	-15.3		-198.412	-228.35	-198.799		-13.8878	-197.013	76.6853		9.32724	-1.42068	-13.5764
107.04	-15	-15.3		-204.841	-226.418	-302.192		26.2556	-29.5916	-113.27		-12.7356	27.0866	-6.36987
107.04	-22.1	-15.3		-123.079	-112.553	6.68031		-35.6033	17.2675	-180.035		-3.03897	167.978	-60.0633
510.49	-22.1	-78		-178.223	1.78136	-267.408		-85.1569	-158.352	-51.472		22.4682	-97.6924	-58.2633
510.49	-22.1	-78		-130.811	-87.8291	-67.5085		-93.1501	-43.1218	-79.1432		-54.3736	17.1511	-74.0965
663.64	-22.1	-78		-64.3553	-48.807	617.373		60.2885	-121.882	-102.238		-55.1127	6.98862	-26.1267
425.41	-22.1	-78		16.8902	-193.09	-286.931		-48.8727	-162.713	-96.4516		-36.0935	-134.845	-55.6733
425.41	-22.1	-78		-131.515	-229.979	-261.222		-92.6286	-15.6007	-15.6451		34.1594	-104.787	-47.0076
319.06	-22.1	-78		-36.9078	-355.972	-200.061		12.1483	36.098	-94.396		18.1975	-1.08894	-21.7566
319.06	-22.1	-78		-87.3722	-124.565	-361.424		60.6216	-44.278	5.27507		8.11846	14.2651	-49.6568
117.81	-22.1	-78		-403.62	-136.256	-305.132		-91.0633	-18.378	-59.2264		-6.60271	-100.978	11.6419
117.81	-22.1	-78		-110.224	-229.604	-215.365		-7.71605	-256.677	-48.1523		62.0527	16.7261	73.1897
117.81	-22.1	-78		-16.9754	-122.64	-174.626		13.1986	-149.06	-74.0683		-51.952	20.6623	16.5551
117.81	-22.1	-23.2		-49.9214	-157.798	-32.9138		38.8093	-89.5034	-18.6174		89.642	-14.6312	-9.82755
494.54	-22.1	-23.2		-150.191	-176.797	-250.982		80.2157	-144.394	-8.74061		-114.219	-6.45083	57.9693
494.54	-22.1	-23.2		-67.1597	-94.2567	-189.096		-221.278	-142.633	-25.6413		-16.3907	13.1311	-20.4125
494.54	-22.1	-23.2		-203.113	-45.4568	-221.355		47.4642	59.3269	-99.6386		74.7807	-62.9955	16.0102
494.54	-22.1	-23.2		57.7541	-222.571	-211.119		54.0988	-98.4011	-40.4097		7.372	-50.947	-78.9925
494.54	-22.1	-23.2		-138.614	-83.1381	-246.298		-85.3641	-183.648	-9.5706		9.68468	33.9953	-3.30097
51.05	-22.1	-23.2		-104.805	-124.776	-188.189		-45.4946	1.99377	-63.5765		35.0333	-33.139	6.43364
51.05	-22.1	-23.2		-43.9385	-110.9	-206.718		-138.691	-94.854	-24.9206		-20.5397	-44.6107	-34.8373
51.05	-22.1	-23.2		-197.829	-173.631	-90.2739		-73.1594	19.6924	-130.028		42.0388	-17.9074	-54.4142
51.05	-22.1	-23.2		-149.029	-147.987	-19.5032		26.4342	-99.0282	2.13089		-2.62389	69.8011	-70.9704
51.05	-22.1	-23.2		27.2131	-244.889	-303.546		-231.499	-158.899	-64.3921		29.47	-23.7225	-6.9434
51.05	-22.1	-23.2		-209.318	-99.416	-353.375		27.282	-40.5865	19.8351		25.8958	-34.7092	-8.12691
51.05	-22.1	-23.2		66.2744	-69.8867	-193.414		-94.2603	-27.6801	-47.0732		14.7938	-111.165	-35.1141
51.05	-22.1	-23.2		-74.1563	-262.174	-158.421		-103.674	-27.1797	-152.519		-32.6437	-33.1716	42.4373
51.05	-22.1	-23.2		-166.717	-41.0737	-259.322		-225.943	-115.759	-71.988		18.2859	-31.5808	166.697
255.24	-22.1	-23.2		-351.804	-35.9333	-330.015		-366.146	-46.5591	-59.1224		-60.7429	-34.8156	235.077
53.74	-22.1	-287.2		76.0779	-220.556	-155.994		-178.683	-55.8982	-23.8567		37.2154	-7.62558	6.90031
53.74	-22.1	-287.2		-273.087	-66.0457	-170.642		-169.405	-81.1312	-61.3716		15.1005	-25.6162	-55.6306
53.74	-22.1	-287.2		-96.8558	-335.799	-181.017		-171.981	-140.674	-26.7114		-51.1654	-43.0089	-66.2159
53.74	-22.1	-287.2		-307.303	-162.596	-40.5694		-57.2263	-51.4402	-33.811		45.8937	32.3522	-8.19769
53.74	-22.1	-287.2		-218.83	-39.962	-239.058		19.288	-21.4873	-103.594		-60.0661	13.727	-50.1557
116.02	-22.1	-223.3		-53.3888	-213.06	-256.69		44.515	259.021	-29.3011		-79.2223	5.05418	77.0205
116.02	-22.1	-223.3		-24.5722	-198.672	-241.303		-223.373	-44.3621	-87.6916		99.1252	-14.3711	1.20272
116.02	-22.1	-223.3		-114.749	-202.204	-194.226		-306.22	-105.931	-218.168		66.9022	-104.986	-6.35768
26.87	-22.1	-223.3		-97.6444	-198.271	-174.892		-164.597	-12.1234	-40.7809		-14.3037	16.4516	-69.7838
26.87	-22.1	-223.3		-1.75157	-67.2107	-285.321		56.8348	-109.157	12.457		32.8411	3.47478	-40.2125
26.87	-22.1	-223.3		-376.126	-63.0467	-266.616		-16.0634	-69.0502	20.3263		49.5421	-53.5795	-37.3428
26.87	-22.1	-223.3		-152.691	-280.757	-369.945		-61.9681	-16.5062	-53.3917		-8.70324	-37.7778	-24.0429
26.87	-22.1	-223.3		5.9024	-246.163	-49.8716		-201.138	110.775	-20.0659		62.4254	-70.3532	-40.5134
26.87	-22.1	-223.3		-46.7084	-360.519	757.488		-99.6935	-153.676	-86.0315		57.0731	-18.1679	-19.8847
26.87	-22.1	-223.3		-192.946	-239.245	-281.948		-154.35	-185.08	-34.9139		60.6867	31.4668	-30.553
26.87	-22.1	-223.3		2.28086	-37.2034	-174.316		-134.132	-231.799	-54.4433		-64.2188	-47.1016	38.7474
26.87	-22.1	-223.3		-133.006	-96.7487	-379.918		-80.4937	-120.784	-69.2357		46.8502	7.20699	331.763
26.87	-22.1	-223.3		-187.501	-47.9723	-186.623		-193.244	-56.857	-83.1368		42.1965	41.503	-81.5914
26.87	-22.1	-223.3		-131.709	-187.794	-100.396		-214.926	-164.832	-12.5935		41.6234	-41.5611	-17.7848
553.03	-96.8	-461.2		-343.883	-172.811	-253.104		-12.5354	-42.2752	43.8711		48.7807	-1.92117	-102.882
553.03	-96.8	-461.2		0.759293	-172.903	-161.751		-38.8552	9.65413	34.9702		19.0004	-28.7751	-30.3411
531.76	-96.8	-461.2		-96.4259	-175.953	-263.407		25.8046	-64.3684	351.526		57.3652	-61.4433	3.55343
531.76	-96.8	-461.2		-201.721	-237.593	-410.46		-181.331	-173.757	-21.5848		-18.7681	-63.9325	-55.0451
531.76	-96.8	-461.2		21.094	-96.752	-108.885		78.5506	-59.8139	-112.824		3.62053	-57.9134	-47.8401
583.42	-96.8	-461.2		36.5595	-166.792	-327.864		-230.831	-114.468	126.185		-19.2605	-16.2553	305.824
583.42	-96.8	-461.2		-275.897	-155.211	-178.956		-215.724	-94.9921	212.877		7.49308	30.0894	-14.4227
8.8	-96.8	-461.2		-429.646	-269.235	-239.478		-291.532	-76.8813	-50.0813		14.3426	-52.8622	-34.2033
8.8	-297.8	-461.2		40.9947	-45.6316	-257.844		-99.1238	-68.4309	-80.1589		118.501	2.3008	-21.5269
8.8	-297.8	-461.2		131.882	-142.982	-151.633		104.231	-21.3024	-9.08334		22.0899	11.1418	-19.003
8.8	-297.8	-461.2		-168.615	-139.996	-69.34		-331.502	-76.9706	23.142		18.7115	150.277	75.0794
8.8	-510.5	-461.2		-215.812	-356.854	116.927		-46.2432	-23.6653	6.78997		-17.2603	-63.3845	-37.5392
8.8	-978.4	-461.2		-184.306	-239.779	146.436		28.2468	-126.008	-61.7444		-75.522	-47.0182	-26.4172
8.8	-978.4	-461.2		-121.064	-71.92	-275.169		-246.674	-116.399	10.3392		55.3194	-36.5406	-49.6988
8.8	-401.1	-461.2		-206.333	-186.346	-340.376		-97.8101	-28.5219	-45.4164		75.9737	-65.9081	434.04
8.8	-401.1	-461.2		-293.992	-19.2438	-316.773		20.3006	7.06979	-50.3886		-22.1316	-25.3952	-22.8966
8.8	-191.4	-485		85.293	-34.3347	-230.047		-48.7822	-207.816	-86.1327		61.0144	-105.615	7.97218
8.8	-191.4	-485		-182.312	-223.817	-120.537		-382.967	11.2876	87.8086		-24.4433	-85.644	-46.7175
8.8	-429.9	-485		36.6797	35.3485	-62.8478		-169.573	119.181	-12.974		39.0363	-27.1356	-24.4207
8.8	-429.9	-485		-303.72	-42.5912	-230.35		-154.143	78.4593	-122.431		57.3828	237.599	6.0349
8.8	-429.9	-485		-3.97717	38.4463	-120.569		51.1375	-80.1559	-16.9423		57.8474	-14.8724	-33.4958
8.8	-429.9	-485		-210.597	94.9089	-376.876		-59.2665	-118.458	-14.02		-6.58499	-8.00352	-1.65445
8.8	-429.9	-485		25.1702	-47.8824	-214.966		-79.1839	-198.53	-23.7884		-34.2803	44.532	-59.7412
8.8	-145.9	-485		5.07267	-186.626	-120.399		-98.2846	-210.043	-8.63571		-10.513	-53.2433	-16.5804
159.53	-145.9	-485		-159.415	-91.9212	-155.665		-296.496	-245.874	-47.5062		-1.49403	-71.0228	-80.8465
159.53	-437.6	-257.7		-104.96	22.8203	-187.252		-107.822	-113.909	-92.9458		14.3285	-29.8936	-19.4683
408.39	-437.6	-257.7		-211.197	-145.767	-234.62		-178.161	-131.716	-18.0812		-42.9955	-70.8435	-34.452
601.65	-319.1	-257.7		-102.521	-201.507	-314.176		5.60841	-51.1622	400.727		-16.613	78.2463	-21.924
601.65	-319.1	-257.7		-25.0068	-63.1729	-220.966		-51.9496	-24.5641	-83.2229		52.8732	57.0593	-46.6299
601.65	-319.1	-257.7		-190.973	199.435	-108.866		-93.0914	-156.499	-88.2055		18.7879	0.825365	43.7051
601.65	-255.2	-257.7		-135.261	-78.4486	-271.566		-193.244	-121.907	-78.7715		-42.8804	-120.265	10.3749
510.49	-255.2	-257.7		23.1137	-128.552	-173.462		-39.5642	-89.0683	-16.7438		-9.29409	-33.1393	-56.5375
510.49	-255.2	-257.7		-177.249	-87.1629	-174.299		-265.493	-32.5683	-12.3665		41.7575	22.8505	-35.1702
510.49	-255.2	-257.7		46.5803	-268.063	-116.177		-263.157	23.1844	-19.7		40.885	0.241449	-14.1903
413.25	-255.2	-257.7		-18.5886	-104.849	-173.888		-115.597	-8.94009	-45.2659		-42.5132	-93.2666	-13.4354
413.25	-216	-257.7		-169.311	-360.019	-194.485		-53.0191	21.6522	4.71507		5.19402	69.956	-18.2259
413.25	-216	-257.7		-69.5826	-294.005	-180.744		15.8318	25.1352	-111.925		41.1219	121.679	-53.9033
413.25	-216	-257.7		-26.6687	-92.9554	-263.831		154.633	-83.6489	15.3457		-23.8742	-60.8694	-30.7793
413.25	-216	-257.7		-147.64	-44.6631	-170.733		33.7673	-105.898	-27.0748		6.05729	-98.8463	-28.3809
413.25	-638.1	-257.7		-356.415	-40.2535	-190.875		5.54175	32.1063	-103.359		-81.7756	43.1907	-27.6502
5.94	-467.9	-257.7		-370.913	-123.139	-155.794		-91.1755	-96.8759	-59.514		33.5562	27.8725	-76.0841
[truncated: 50,204 more rows]
