# Supplementary material for: Kinesin-1, -2, and -3 motors use family-specific mechanochemical strategies to effectively compete with dynein during bidirectional transport
Source: eLife. 2022 Sep 20;11:e82228. doi: 10.7554/eLife.82228 (PMC9545524; doi:10.7554/eLife.82228)
Supplement: Figure 6—source data 1. [file elife-82228-fig6-data1.xlsx]

## Sheet: Fig. 6B
1-sec Seg Velocities (simulation) (nm/s)				Slow 1-sec Seg Velocities (no pauses, experiment) (nm/s)
DDB-Kin1	DDB-Kin2	DDB-Kin3		DDB-Kin1	DDB-Kin2	DDB-Kin3
9.6623	-34.5165	-6.20412		-311.97	-319.1	-102.1
7.63925	-61.6016	-45.3338		-311.97	-75.1	-102.1
-12.0708	-44.079	-27.2455		-311.97	-75.1	-102.1
-0.3238	-52.7728	-2.08403		-304.33	-75.1	-28.4
82.1238	8.51396	601.638		-304.33	-75.1	-28.4
-13.2436	11.2665	-76.957		-304.33	-75.1	-28.4
-24.1486	6.4909	-9.86631		-304.33	-569.4	-28.4
35.2702	-14.3804	-47.3261		-304.33	-569.4	-28.4
8.7314	-30.5375	-46.5068		-304.33	-569.4	-28.4
-35.8056	-124.894	-10.0885		-304.33	-569.4	-28.4
-21.379	-11.9888	-45.7115		-304.33	-600.3	-28.4
18.0666	-25.0076	13.2742		-304.33	-600.3	-106.4
-15.1972	-24.5278	131.695		-304.33	-600.3	-106.4
113.755	-62.3624	-45.6857		-304.33	-600.3	-106.4
37.7202	-39.4864	12.3047		-304.33	-600.3	-255.2
2.04108	-53.9726	287.96		-304.33	-600.3	-306.3
69.8857	23.5295	-36.1926		-304.33	-600.3	-18.5
-24.0505	-61.5571	-63.4921		-304.33	-600.3	-18.5
-47.8609	24.4617	-19.2417		-306.29	-600.3	-18.5
-41.611	-13.7411	397.538		-191.43	-600.3	-18.5
12.7688	-15.668	298.01		-893.36	-600.3	-18.5
73.0708	-15.2558	5.30831		-21.12	-600.3	-18.5
68.387	-75.3877	6.0235		-21.12	-600.3	-18.5
69.2167	-18.6506	-48.2365		-21.12	-600.3	-18.5
29.352	-72.9927	-17.3975		-21.12	-600.3	-18.5
-10.8558	-47.4752	-31.2693		-21.12	-121.8	-18.5
43.1123	35.2536	-2.63597		-21.12	-121.8	-18.5
9.6156	-3.73465	-34.3619		-21.12	-121.8	-18.5
-17.0109	-28.0977	93.1713		-21.12	-121.8	-18.5
81.1947	-56.419	-27.7777		-21.12	-121.8	-18.5
-22.5642	-87.6893	-35.3151		-21.12	-121.8	-18.5
-3.98588	-60.9199	-80.8875		-21.12	-121.8	-18.5
19.5528	13.7773	-89.3477		-21.12	-121.8	-18.5
-5.22104	22.0521	-60.1778		-21.12	-121.8	-18.5
27.3438	29.771	-14.8999		-21.12	-121.8	-18.5
30.9366	-68.6667	193.3		-21.12	-121.8	-18.5
151.346	-10.8585	-15.6463		-21.12	-121.8	-34.5
-32.7498	-47.479	-30.9781		-21.12	-121.8	-34.5
42.4304	-104.174	-25.342		-21.12	-36.5	-34.5
3.78546	-72.21	-8.32623		-21.12	-36.5	-34.5
62.2414	-82.5864	-45.4384		-21.12	-36.5	-34.5
24.7747	51.0982	-32.5417		-21.12	-36.5	-34.5
0.326514	-48.4063	-71.1569		-21.12	-36.5	-34.5
-15.6509	-41.9563	-35.776		-21.12	-36.5	-34.5
-3.09698	-34.036	-40.5174		-21.12	-88.8	-34.5
33.9117	-32.0987	-39.1107		-21.12	-88.8	-34.5
-2.33586	16.0394	18.7707		-21.12	-88.8	-34.5
-103.432	-39.2991	-7.8883		-21.12	-88.8	-69.2
-13.6817	-45.3758	-54.0677		-21.12	-88.8	-69.2
35.8338	-12.155	2.27061		-21.12	-88.8	-69.2
-13.7999	-24.2131	-55.7058		-21.12	-88.8	-69.2
23.0383	-35.2715	17.1586		-21.12	-51	-69.2
-47.5137	-39.5294	588.778		-21.12	-51	-69.2
-23.6503	-38.831	934.61		-21.12	-51	-69.2
51.4451	-31.7923	110.437		-21.12	-51	-69.2
65.8601	7.24547	-49.6589		-21.12	-382.9	-69.2
112.706	35.0971	-24.1481		-21.12	-382.9	-69.2
28.1892	-40.475	30.7311		-21.12	-467.9	-69.2
78.7372	1.48034	2.06914		-21.12	-467.9	-69.2
61.2299	-19.2524	-135.616		-21.12	-595.6	-69.2
14.3169	-12.9748	-51.1538		-21.12	-425.4	-69.2
-10.5121	-62.2337	-2.48343		-21.12	-212.7	-69.2
12.2974	-46.8032	-23.4129		-21.12	-212.7	-69.2
18.5319	28.5878	-0.752829		-425.41	-255.2	-69.2
-60.0585	-80.1274	-63.6207		-19.63	-255.2	-465.4
43.2285	-37.2797	-15.1611		-19.63	-255.2	-465.4
-25.5112	-31.7557	8.04395		-19.63	-255.2	-465.4
0.252344	-92.4329	-16.8415		-19.63	-638.1	-465.4
-4.46978	-4.52114	-8.99729		-19.63	-280.8	-465.4
-16.7866	2.18671	-35.7698		-19.63	-280.8	-255.2
9.15225	-6.10613	-84.7708		-19.63	-280.8	-255.2
66.3575	-72.029	-69.1302		-19.63	-56.7	-340.3
-63.2399	3.59151	-53.2602		-19.63	-56.7	-119.6
-101.778	-36.8572	-6.50815		-19.63	-56.7	-119.6
-8.23486	57.573	-5.14414		-19.63	-56.7	-119.6
-10.9045	8.56511	765.416		-116.02	-56.7	-119.6
36.0366	-53.321	872.36		-116.02	-56.7	-119.6
6.58955	-0.225988	-13.4193		-116.02	-56.7	-119.6
30.1709	-60.424	90.4618		-170.16	-56.7	-119.6
-89.062	-53.2408	-91.5503		-201.51	-56.7	-119.6
16.1041	-39.6465	-22.1838		-201.51	-56.7	-119.6
25.8514	-68.7486	-33.4835		-201.51	-120.1	-56
-15.3492	-45.2707	-20.4424		-201.51	-120.1	-56
-29.1692	47.7932	-58.2258		-201.51	-120.1	-56
-33.5174	110.031	-42.8365		-364.64	-120.1	-56
51.5874	-66.7347	11.3896		-364.64	-120.1	-56
-11.7404	-10.938	-79.3545		-1123.08	-182.3	-56
25.7608	-59.7119	-62.7643		-453.77	-182.3	-56
-14.4381	-77.1507	-14.6213		-453.77	-131.7	-56
-40.8186	-27.6326	-86.4766		-453.77	-131.7	-56
-19.0614	-31.7742	28.2807		-32.49	-131.7	-56
-38.3941	-15.9143	-9.73547		-32.49	-131.7	-56
191.029	-23.6271	124.983		-32.49	-131.7	-56
-11.8492	-68.7337	-101.213		-32.49	-131.7	-204.2
-11.063	48.3181	22.936		-32.49	-131.7	-127.6
43.0436	-8.53862	51.234		-32.49	-131.7	-127.6
-26.7413	-30.7279	-35.5899		-32.49	-131.7	-127.6
9.66201	-39.0996	-3.5074		-32.49	-113.4	-127.6
23.099	-54.7465	-60.029		-32.49	-113.4	-127.6
-120.677	-30.4914	8.07428		-32.49	-113.4	-127.6
27.8096	-4.91223	-77.2581		-32.49	-102.1	-127.6
-43.877	-78.8573	-50.7921		-32.49	-208.8	-127.6
33.221	-72.0546	9.44619		-32.49	-208.8	-127.6
-15.1158	-48.3693	-69.1196		-32.49	-208.8	-139.2
98.6947	-88.2339	-50.1657		-32.49	-170.2	-139.2
-8.25615	-25.5789	-80.9503		-32.49	-11.7	-139.2
34.6675	-81.0512	45.639		-474.03	-11.7	-109.4
-14.1127	-77.3962	-4.84655		-474.03	-11.7	-109.4
-32.2049	-34.9298	-69.5323		-283.61	-11.7	-109.4
-1.77746	-38.8362	14.3002		-283.61	-11.7	-109.4
99.6772	136.637	-71.286		-283.61	-11.7	-109.4
-4.44745	102.429	-7.99949		-204.2	-11.7	-109.4
4.02187	-8.35105	22.8224		-204.2	-11.7	-124.2
24.823	-41.2621	-55.5951		-204.2	-11.7	-124.2
37.9189	-78.2325	-23.1268		-204.2	-11.7	-124.2
-16.534	-94.3709	-55.0043		-204.2	-11.7	-124.2
-13.8201	15.55	-39.2762		-204.2	-11.7	-124.2
-18.7959	-19.3466	-56.5617		-297.79	-11.7	-124.2
34.2757	-30.5507	-88.1818		-297.79	-11.7	-124.2
-4.78789	21.2754	-47.2157		-425.41	-11.7	-124.2
26.157	-82.9613	-82.0293		-255.24	-11.7	-124.2
-23.327	-2.41028	-41.3194		-255.24	-11.7	-124.2
-16.0348	-15.8102	-65.5259		-255.24	-11.7	-124.2
55.646	-84.4205	-36.4968		-255.24	-11.7	-283.6
39.6161	-12.6802	-40.0561		-255.24	-11.7	-283.6
-1.06597	-82.4254	0.856699		-57.43	-11.7	-283.6
69.6312	-31.6369	6.31553		-57.43	-11.7	-68.7
-35.8283	-10.8139	-5.48008		-57.43	-11.7	-68.7
58.689	-16.3957	-53.989		-57.43	-11.7	-68.7
-24.0988	9.26729	-34.0016		-57.43	-11.7	-68.7
15.1297	-38.8283	-49.3137		-57.43	-11.7	-68.7
-22.3706	20.6746	168.28		-57.43	-11.7	-68.7
-2.08229	-79.2237	14.3864		-57.43	-11.7	-68.7
-54.5683	-53.8064	-29.6302		-57.43	-11.7	-280.8
32.2307	-115.436	-65.0875		-57.43	-11.7	-280.8
12.6559	-96.8719	-35.1459		-57.43	-11.7	-280.8
27.7397	-40.7335	75.0129		-142.94	-229.7	-42.5
38.1999	18.758	118.604		-142.94	-229.7	-42.5
-29.6426	14.691	31.7215		-142.94	-229.7	-42.5
132.15	-49.0941	-58.0744		-142.94	-127.6	-364.6
-61.8425	-102.334	-83.666		-142.94	-127.6	-364.6
31.367	-50.6104	-58.45		-142.94	-127.6	-31.9
27.6458	-40.5793	-56.4053		-142.94	-127.6	-31.9
33.3818	-64.8114	427.535		-382.87	-127.6	-31.9
54.8799	-5.57031	140.236		-357.34	-30	-31.9
-48.7244	118.946	3.14269		-255.24	-30	-31.9
-34.6724	5.23791	-50.9182		-8.1	-30	-31.9
13.9078	-43.9292	39.0953		-8.1	-30	-31.9
-2.62789	-62.6361	7.88575		-8.1	-30	-31.9
17.7611	100.109	-6.28774		-8.1	-139.2	-31.9
23.4534	-37.3921	0.282571		-8.1	-139.2	-31.9
39.5918	-39.7966	-16.0455		-8.1	-139.2	-31.9
-46.4646	-134.858	14.8305		-8.1	-139.2	-31.9
-0.0843224	-26.6462	522.791		-8.1	-139.2	-31.9
-28.1929	-39.3501	5.66199		-8.1	-139.2	-31.9
-36.5958	-20.9151	-9.28297		-8.1	-139.2	-31.9
-22.7427	-79.2426	-3.40537		-8.1	-139.2	-31.9
-28.1675	-12.6518	23.8614		-8.1	-139.2	-31.9
15.2486	-85.6288	-50.0956		-8.1	-139.2	-31.9
40.5801	-66.8337	38.2513		-8.1	-139.2	-31.9
-40.3164	-9.11828	-33.5991		-8.1	-139.2	-31.9
24.4074	34.3899	2.64152		-8.1	-139.2	-31.9
-34.7578	-56.6341	127.218		-8.1	-139.2	-137.4
-76.9879	15.1656	-26.5407		-8.1	-139.2	-137.4
51.4512	-32.587	-17.1411		-162.43	-139.2	-137.4
24.0199	-27.4471	65.0747		-162.43	-139.2	-137.4
-19.0601	-82.1319	-49.9669		-162.43	-139.2	-137.4
-57.0278	-68.1865	18.1148		-319.06	-139.2	-137.4
19.1951	-8.6638	24.7638		-311.97	-139.2	-137.4
-70.4122	-0.594221	122.429		-311.97	-139.2	-25.5
4.00532	-112.909	61.1724		-311.97	-139.2	-25.5
-56.3425	-103.268	26.3127		-11.1	-114.9	-25.5
10.907	-23.9098	-94.9057		-11.1	-114.9	-25.5
23.4854	12.6818	4.27201		-11.1	-114.9	-25.5
-37.4674	-16.7411	61.8093		-11.1	-114.9	-25.5
205.665	-30.5054	0.0454466		-11.1	-114.9	-25.5
46.6154	-84.1731	15.1688		-11.1	-114.9	-25.5
-33.0209	0.151215	-0.611425		-11.1	-18.2	-25.5
68.2821	-33.1231	28.3722		-11.1	-18.2	-25.5
449.657	-70.5513	27.3863		-11.1	-18.2	-25.5
18.9276	-13.9335	-69.1915		-11.1	-18.2	-25.5
-23.2948	82.2685	-86.9984		-11.1	-18.2	-25.5
-22.5948	-32.5076	-90.5277		-11.1	-18.2	-25.5
42.0453	22.9697	-4.88234		-11.1	-18.2	-25.5
-4.10355	28.4354	-44.7343		-127.62	-18.2	-25.5
-94.2769	2.31636	-6.31588		-127.62	-18.2	-25.5
46.0722	-31.4651	-42.319		-127.62	-18.2	-25.5
-33.5126	47.9383	4.37578		-127.62	-18.2	-25.5
25.0524	42.4743	-41.4934		-127.62	-18.2	-25.5
177.962	34.2969	9.65403		-127.62	-46.7	-25.5
-46.1752	6.8726	-32.4536		-7.98	-46.7	-25.5
37.5964	-71.3794	87.1008		-7.98	-46.7	-25.5
44.387	114.161	71.178		-7.98	-46.7	-170.2
23.7114	-37.5743	-46.8814		-7.98	-46.7	-170.2
-34.986	3.19387	-28.2493		-7.98	-46.7	-170.2
-18.0632	-8.33869	-11.8454		-7.98	-46.7	-255.2
-12.5271	-45.4256	-57.3969		-7.98	-46.7	-255.2
2.62731	-41.219	0.782824		-7.98	-46.7	-829.5
-24.8103	4.05449	-45.503		-7.98	-46.7	-829.5
-2.49145	31.3444	-42.0488		-7.98	-46.7	-829.5
-23.2542	-4.5939	-82.7092		-7.98	-46.7	-829.5
52.2939	-76.0615	0.070406		-7.98	-46.7	-829.5
-40.4793	-67.0224	-14.7624		-7.98	-46.7	-232
18.697	53.0546	-92.6239		-7.98	-46.7	-232
64.1501	78.3286	-57.4949		-7.98	-46.7	-232
-11.9207	-46.2314	53.3779		-7.98	-46.7	-638.1
21.6773	59.3874	-49.0597		-7.98	-46.7	-51
35.5641	0.540474	34.7854		-7.98	-46.7	-51
-12.1572	-5.62955	26.4236		-25.78	-46.7	-51
65.4752	-81.9317	-32.7517		-25.78	-536	-51
-36.1543	-2.62305	-24.0189		-25.78	-536	-51
32.7473	14.6073	-85.2084		-25.78	-536	-51
-46.5453	20.9137	-67.8457		-25.78	-127.6	-51
41.6201	-91.698	10.1583		-25.78	-127.6	-51
24.5476	-71.0935	-21.7736		-25.78	-29.5	-51
62.748	-26.3066	454.62		-25.78	-29.5	-237
-14.4281	14.0066	-58.0784		-25.78	-29.5	-237
-38.2869	-53.3003	-37.2972		-25.78	-29.5	-237
45.1742	3.10273	-3.82124		-25.78	-29.5	-237
52.0212	-73.3846	-52.4461		-25.78	-29.5	-264.4
-58.4538	-16.6226	-27.2975		-25.78	-29.5	-264.4
-45.7246	-22.0653	9.65894		-25.78	-29.5	-264.4
4.50724	-74.4711	-62.1955		-25.78	-29.5	-264.4
28.2642	-29.5353	-9.65087		-25.78	-29.5	-264.4
38.4711	-13.6331	245.503		-25.78	-29.5	-264.4
34.0534	-11.0423	24.0169		-25.78	-29.5	-264.4
45.3902	-10.4844	-34.3113		-25.78	-29.5	-264.4
-34.9627	-52.8893	-78.684		-25.78	-29.5	-60.1
9.12746	9.22561	-40.2691		-25.78	-29.5	-60.1
5.40345	83.7275	8.67573		-25.78	-162.4	-60.1
-17.4373	-49.5361	-30.5709		-25.78	-162.4	-60.1
-38.2217	-35.9079	28.2918		-25.78	-162.4	-60.1
-72.6427	29.3148	-16.9791		-25.78	-69.6	-60.1
50.5442	20.8794	-90.0951		-25.78	-69.6	-60.1
0.296657	15.8531	-13.1487		-25.78	-69.6	-60.1
79.4686	-8.136	11.3516		-25.78	-69.6	-60.1
6.13053	14.7001	-5.6319		-510.49	-69.6	-60.1
57.4646	-121.001	-15.5986		-18.5	-69.6	-255.2
-14.409	-82.4814	25.3597		-18.5	-145.9	-255.2
17.806	18.5109	89.2745		-18.5	-145.9	-255.2
14.0305	-60.8019	43.0225		-18.5	-586.1	-765.7
22.4645	-73.3983	-13.5207		-18.5	-586.1	-3.9
31.5813	14.2724	-65.2879		-18.5	-586.1	-3.9
-8.2455	-38.9923	-5.45893		-18.5	-586.1	-3.9
22.0425	13.2953	-46.5352		-18.5	-586.1	-3.9
-21.0783	-39.37	-52.7009		-18.5	-586.1	-3.9
20.5782	3.42954	-11.6256		-18.5	-586.1	-3.9
2.72351	-38.8519	-31.886		-18.5	-586.1	-3.9
-49.287	-44.8054	-31.6538		-18.5	-586.1	-3.9
-44.0351	10.7903	-56.1008		-18.5	-586.1	-3.9
12.7957	-0.980049	-11.5814		-18.5	-586.1	-3.9
156.537	-61.2595	-23.1234		-18.5	-586.1	-3.9
-21.8824	-36.3419	-8.78466		-18.5	-586.1	-3.9
-2.86243	-15.2239	23.0271		-18.5	-586.1	-3.9
10.0708	-78.0657	-66.9802		-18.5	-586.1	-3.9
-61.7962	-17.2248	-19.2859		-18.5	-116	-3.9
18.4492	-17.6655	-13.4924		-18.5	-116	-3.9
-39.3581	-54.6069	-8.15514		-18.5	-116	-3.9
-4.40535	21.0428	-1.54932		-18.5	-116	-3.9
37.2805	-9.15951	-25.9265		-18.5	-116	-3.9
18.7587	-4.33407	-43.9789		-18.5	-116	-3.9
56.279	-5.0661	-4.99115		-18.5	-116	-3.9
-17.8182	-73.1245	-3.63473		-18.5	-116	-3.9
-31.486	-73.6978	-52.2562		-18.5	-116	-3.9
-13.924	27.94	8.48976		-18.5	-116	-3.9
-0.280087	-3.82275	-72.6168		-18.5	-116	-3.9
-29.8385	9.28173	-84.0977		-18.5	-116	-3.9
-107.524	-85.0385	14.6546		-18.5	-116	-3.9
18.3458	-50.3214	-76.1659		-18.5	-20.3	-3.9
-2.17261	-39.3078	-62.5871		-18.5	-20.3	-3.9
-59.5565	-3.21816	7.96478		-18.5	-20.3	-3.9
31.7295	-63.2891	-58.8429		-18.5	-20.3	-3.9
38.0464	-43.6523	6.41145		-18.5	-20.3	-3.9
-11.6732	-0.866457	-21.6822		-18.5	-20.3	-3.9
18.9556	-16.1688	-27.202		-18.5	-20.3	-3.9
2.25142	-15.2794	-13.5702		-18.5	-20.3	-3.9
57.8118	-24.1125	18.1566		-18.5	-20.3	-3.9
110.014	-45.53	-18.6563		-212.7	-20.3	-3.9
36.4572	-19.3739	-21.9435		-212.7	-20.3	-3.9
39.7048	-80.2284	-31.1231		-9.69	-20.3	-3.9
237.304	-32.1334	-38.0512		-9.69	-20.3	-3.9
46.4995	-49.0904	-69.7897		-9.69	-20.3	-3.9
-45.0583	-47.1104	26.5908		-9.69	-20.3	-3.9
110.244	-66.6648	-36.3072		-9.69	-20.3	-3.9
29.8402	-15.3641	-95.1427		-9.69	-20.3	-3.9
-11.1192	-12.0163	-59.5927		-9.69	-20.3	-3.9
-3.63298	-32.7349	7.76688		-9.69	-742.5	-3.9
-4.20474	-129.943	51.0711		-9.69	-742.5	-3.9
14.1783	-54.6684	-69.779		-9.69	-742.5	-3.9
-25.0361	-20.8773	36.3995		-9.69	-553	-3.9
41.0194	-52.168	-94.3184		-9.69	-553	-3.9
22.5678	-79.3691	-36.0312		-9.69	-306.3	-3.9
12.7021	-82.4754	50.3657		-9.69	-408.4	-3.9
67.9728	17.5882	-57.9736		-9.69	-255.2	-3.9
-25.9447	-31.6268	-42.0934		-9.69	-255.2	-3.9
-33.0665	-101.45	22.6281		-9.69	-255.2	-3.9
23.9347	-56.2535	11.3333		-9.69	-43.8	-3.9
1.20707	20.9963	-25.4405		-9.69	-43.8	-91.2
97.0819	-24.6443	-25.1882		-9.69	-43.8	-91.2
44.4864	-35.3232	-31.7123		-9.69	-43.8	-91.2
21.1973	-39.9403	50.1629		-9.69	-43.8	-91.2
-33.2326	39.3836	-11.4145		-9.69	-43.8	-8.4
-61.3973	32.6023	-0.912588		-765.73	-43.8	-8.4
-36.9999	-30.416	-83.3991		-364.64	-43.8	-8.4
-35.1361	-99.6276	-33.587		-364.64	-43.8	-8.4
-3.98753	-76.2911	-32.2184		-364.64	-43.8	-8.4
53.5328	23.8875	-0.925879		-364.64	-43.8	-8.4
9.10886	-3.61504	40.234		-375.36	-43.8	-8.4
57.8282	-26.6908	17.0557		-375.36	-43.8	-8.4
8.63394	-30.8576	-30.169		-375.36	-43.8	-8.4
12.3631	-133.786	-62.1654		-375.36	-43.8	-8.4
54.5181	-88.6034	-16.1645		-375.36	-43.8	-8.4
60.0584	-59.9795	-108.458		-120.12	-43.8	-8.4
-21.8618	-58.3673	-39.0108		-120.12	-43.8	-8.4
47.674	-39.3202	-26.3396		-120.12	-43.8	-8.4
32.5029	-93.4236	51.3042		-120.12	-43.8	-8.4
51.2178	-65.9741	-81.6043		-120.12	-43.8	-8.4
-1.60212	-38.6389	-66.0038		-816.78	-43.8	-8.4
16.8554	-16.8684	-35.3303		-102.1	-43.8	-8.4
51.9963	-19.1426	-44.3055		-18.56	-43.8	-8.4
-0.573646	-52.7314	-4.56026		-18.56	-43.8	-8.4
-76.63	7.82397	-84.6636		-18.56	-43.8	-8.4
-9.11832	-72.3918	37.213		-18.56	-43.8	-8.4
-39.7755	-33.6619	-48.3203		-18.56	-43.8	-8.4
39.5276	-44.5958	7.92133		-18.56	-29.2	-8.4
-17.5781	-18.666	-14.4734		-18.56	-29.2	-8.4
-29.4857	18.668	2.33178		-18.56	-29.2	-8.4
-4.23044	-15.5896	-6.88013		-18.56	-29.2	-478.6
-27.3401	22.2741	-131.768		-18.56	-29.2	-478.6
-19.2766	-36.2991	-41.3404		-18.56	-29.2	-478.6
-10.3352	-38.1739	-46.1267		-18.56	-29.2	-478.6
81.7414	5.45925	-29.0227		-18.56	-29.2	-478.6
-30.1054	-27.2389	2.19958		-18.56	-29.2	-340.3
15.9652	-120.773	-63.8685		-18.56	-29.2	-340.3
-21.115	17.0709	-14.1486		-18.56	-34.6	-127.6
27.4919	-64.1909	-9.24234		-132.02	-34.6	-127.6
-47.3638	-32.5002	-48.8443		-132.02	-34.6	-162.4
-38.0507	-23.0199	-67.7382		-132.02	-34.6	-162.4
-10.6388	-35.4726	-26.2572		-132.02	-34.6	-162.4
69.4871	-74.8088	5.67551		-132.02	-34.6	-340.3
-46.7324	-20.1293	-26.6149		-132.02	-34.6	-340.3
-3.48754	-127.171	-40.395		-132.02	-34.6	-340.3
36.1069	-34.9111	-18.5541		-132.02	-34.6	-446.7
20.4983	-40.8255	-50.0655		-561.54	-34.6	-85.1
-23.1083	-32.5371	-70.9255		-446.68	-34.6	-85.1
36.1203	-37.9121	-61.9121		-446.68	-34.6	-85.1
12.6507	-0.951528	-21.9876		-26.4	-34.6	-480.5
-45.8041	-6.59736	-94.4787		-26.4	-34.6	-480.5
35.8998	-84.8305	-71.1442		-26.4	-34.6	-480.5
-28.6087	31.9388	2.26091		-26.4	-34.6	-480.5
-9.39864	-8.44295	-78.7959		-26.4	-34.6	-480.5
-31.8917	-12.1399	-65.2141		-26.4	-34.6	-301.7
113.176	-61.5363	-5.21047		-26.4	-34.6	-301.7
-1.22307	-26.4032	-47.9749		-26.4	-34.6	-301.7
14.1307	-11.9028	-41.6413		-6.9	-34.6	-63.8
-12.8007	-30.3825	13.753		-6.9	-34.6	-63.8
-1.38564	-81.8017	-75.3912		-6.9	-34.6	-63.8
45.546	16.4957	-26.5382		-6.9	-34.6	-290.5
39.9898	-81.0689	0.884797		-6.9	-34.6	-290.5
2.96943	20.4261	-5.85354		-6.9	-34.6	-290.5
80.7308	-7.30152	-48.8148		-6.9	-34.6	-290.5
-27.2536	-57.4821	-15.0778		-6.9	-34.6	-290.5
-29.826	20.6774	43.8299		-6.9	-34.6	-290.5
31.2186	-60.8884	-30.5438		-6.9	-34.6	-290.5
35.4337	-66.8856	-35.498		-6.9	-34.6	-290.5
79.402	-32.6837	29.9282		-6.9	-34.6	-7.5
-27.5881	-5.79091	-65.0037		-6.9	-34.6	-7.5
-25.0151	27.5423	-89.5569		-6.9	-34.6	-7.5
39.879	-25.8662	-57.2837		-6.9	-34.6	-7.5
17.474	-12.9066	-29.68		-6.9	-34.6	-7.5
-20.575	-32.9307	324.052		-6.9	-34.6	-7.5
-21.527	-9.56882	-44.0072		-6.9	-34.6	-7.5
-37.4715	-103.208	-36.616		-6.9	-34.6	-7.5
26.801	-59.0444	-60.9612		-6.9	-34.6	-7.5
-99.6514	-110.65	7.68721		-6.9	-34.6	-7.5
-2.31646	-50.6483	43.7079		-220.44	-34.6	-7.5
37.5374	-95.724	-16.5245		-220.44	-34.6	-7.5
6.7178	-70.4008	14.1932		-220.44	-34.6	-7.5
118.688	-88.2645	-1.1996		-220.44	-34.6	-7.5
196.186	0.392204	-3.47707		-220.44	-34.6	-7.5
43.1983	-30.6826	-66.2696		-220.44	-34.6	-7.5
74.4445	-40.2311	-52.1035		-499.39	-34.6	-7.5
7.03428	-105.071	-13.9437		-499.39	-34.6	-7.5
-15.2193	37.6854	-44.9215		-499.39	-34.6	-7.5
20.4607	-70.5404	-8.5926		-499.39	-34.6	-7.5
-8.09752	-49.5124	3.40904		-499.39	-190.4	-7.5
-26.0486	-53.4841	-12.5902		-499.39	-190.4	-7.5
22.8653	-33.0059	-34.6425		-499.39	-190.4	-7.5
-49.285	-42.4156	-62.6832		-198.52	-190.4	-7.5
28.1723	8.13977	-125.131		-198.52	-190.4	-7.5
32.9547	4.37571	442.238		-198.52	-190.4	-7.5
61.5995	-38.7026	-12.2753		-255.24	-190.4	-7.5
71.8858	63.1204	14.4252		-85.08	-190.4	-7.5
27.4184	54.8969	-28.0192		-85.08	-190.4	-7.5
-32.9196	-8.37204	93.7683		-484.97	-190.4	-489.2
-64.6591	6.08222	62.8357		-484.97	-190.4	-489.2
71.2163	-100.429	-28.5226		-484.97	-190.4	-489.2
27.0963	-43.613	501.019		-484.97	-190.4	-127.6
-7.99754	-56.7892	-13.67		-484.97	-190.4	-127.6
-129.88	20.9673	-0.830819		-484.97	-190.4	-406.5
63.8247	-63.3224	-8.42403		-1340.03	-190.4	-406.5
12.4514	40.704	0.780147		-145.85	-190.4	-406.5
-71.6224	1.00667	16.8386		-145.85	-234	-406.5
43.4532	-14.1324	-68.8592		-145.85	-234	-406.5
10.8313	-21.9065	-4.24483		-145.85	-234	-406.5
-1.67155	-94.2852	-30.0718		-95.72	-319.1	-406.5
-29.7322	-36.0714	3.55453		-95.72	-183.5	-406.5
-15.7061	-21.1273	-23.0037		-95.72	-183.5	-319.1
49.2333	-57.3902	1.8481		-95.72	-183.5	-319.1
-11.9213	-17.064	-11.2172		-5.49	-183.5	-680.7
-3.54304	-58.3614	-37.941		-5.49	-183.5	-680.7
-39.5395	4.47329	1.84468		-5.49	-183.5	-680.7
-25.4366	-71.4309	-10.1856		-5.49	-183.5	-580.1
17.0338	-9.7725	-49.5758		-5.49	-183.5	-580.1
-50.3071	-50.7252	8.20341		-5.49	-183.5	-580.1
25.3468	-105.371	-99.7406		-5.49	-150.8	-328.2
58.612	-82.1337	26.4232		-5.49	-150.8	-328.2
-17.4757	-23.4243	116.77		-5.49	-150.8	-99.9
19.5723	-108.079	149.182		-5.49	-150.8	-99.9
-58.7	-43.2869	-16.6099		-5.49	-150.8	-99.9
-62.6265	-0.275457	-37.7803		-5.49	-150.8	-99.9
9.70587	-75.8558	12.5922		-5.49	-170.2	-99.9
26.2039	-27.9378	-59.4746		-5.49	-170.2	-99.9
-93.614	-35.9569	-85.3463		-5.49	-166.2	-99.9
25.7834	-92.5654	-72.1895		-5.49	-166.2	-328.2
10.6128	-40.7937	-47.8271		-5.49	-166.2	-328.2
14.0275	-30.0972	10.7512		-5.49	-166.2	-247
9.18911	54.9064	-40.1325		-5.49	-166.2	-247
36.1453	1.3353	-38.305		-5.49	-166.2	-247
-7.55512	-66.2909	210.095		-5.49	-166.2	-247
3.87644	-60.8462	67.0451		-5.49	-166.2	-247
-8.09584	-55.384	-8.1184		-5.49	-166.2	-247
30.7267	-78.5996	14.3986		-5.49	-166.2	-247
1.40215	-38.0054	-26.6764		-5.49	-166.2	-247
-25.9319	-127.492	-57.5846		-5.49	-166.2	-247
25.0939	-41.4948	-57.9265		-5.49	-166.2	-182.3
-17.3563	-134.792	-84.3449		-99.26	-166.2	-182.3
-4.77289	-42.0168	-47.3454		-99.26	-166.2	-182.3
40.8632	9.48209	-19.9479		-99.26	-166.2	-182.3
-13.0627	-63.7773	-0.137537		-99.26	-166.2	-182.3
46.7151	-7.2961	30.2227		-99.26	-166.2	-182.3
-14.8653	-38.1403	-80.4743		-10.21	-166.2	-182.3
329.448	-53.1569	-6.5392		-10.21	-166.2	-182.3
35.8257	-2.27073	-51.9214		-10.21	-166.2	-96.8
-28.4966	7.00608	-9.92076		-10.21	-166.2	-96.8
-49.0967	-60.4327	-65.8386		-10.21	-166.2	-96.8
-57.055	-12.4282	13.9674		-10.21	-166.2	-96.8
66.9233	-43.5516	-50.7275		-10.21	-166.2	-96.8
-3.12343	-16.5657	-8.82524		-10.21	-312	-96.8
20.6197	8.42323	23.4088		-10.21	-312	-96.8
357.285	-109.892	347.153		-10.21	-312	-96.8
8.95009	-109.059	-61.365		-10.21	-16	-561.5
-24.5952	-94.6377	61.4899		-10.21	-16	-255.2
-21.3548	-26.194	-49.431		-10.21	-16	-127.6
3.371	-73.7252	-45.4974		-10.21	-16	-127.6
17.2066	-44.0647	-62.732		-76.13	-16	-127.6
54.5694	165.278	-45.3485		-76.13	-16	-191.4
-22.734	-80.3487	-4.87627		-76.13	-16	-191.4
53.5649	-55.5493	-34.993		-76.13	-16	-191.4
1.23401	-13.2352	-21.0332		-76.13	-16	-191.4
-52.025	-112.786	-50.9162		-76.13	-16	-191.4
14.9465	-23.7512	-14.2992		-76.13	-16	-191.4
48.0713	-35.4382	-35.1713		-76.13	-16	-191.4
39.7334	-14.9443	-24.5578		-76.13	-16	-57.2
-52.0251	11.611	-46.5175		-76.13	-16	-57.2
19.281	-62.0505	-5.98129		-76.13	-8.7	-57.2
-19.9454	-71.0152	-24.1651		-76.13	-8.7	-57.2
16.5643	-39.8045	-38.4064		-76.13	-8.7	-57.2
-14.6833	-19.6239	41.0763		-76.13	-8.7	-57.2
3.062	-32.1004	-72.388		-76.13	-8.7	-57.2
35.9632	1.47317	-60.2468		-76.13	-8.7	-57.2
-16.2198	-34.87	-48.9976		-255.24	-8.7	-57.2
25.2311	-93.8324	-19.3978		-255.24	-8.7	-57.2
-5.50614	-62.135	-78.0145		-188.08	-8.7	-57.2
-37.8817	89.4759	-29.6272		-188.08	-8.7	-57.2
9.69917	-103.412	-18.6688		-188.08	-8.7	-57.2
135.485	36.0224	201.137		-188.08	-8.7	-57.2
56.082	-27.7968	516.542		-188.08	-8.7	-57.2
-48.6261	3.2338	-41.4687		-42.54	-8.7	-57.2
239.445	-44.3058	39.6243		-42.54	-8.7	-57.2
21.745	-5.11271	10.8817		-42.54	-8.7	-765.7
9.70877	-23.4287	-52.6321		-42.54	-8.7	-765.7
-6.1059	-30.5588	-10.422		-42.54	-78.5	-765.7
6.01328	1.30206	134.012		-42.54	-78.5	-218.8
-8.26852	22.9513	-24.267		-42.54	-78.5	-218.8
11.8226	-83.8026	-38.8501		-42.54	-78.5	-153.1
-0.0143202	-88.083	-41.578		-42.54	-201.8	-216
29.5331	-0.738024	46.6818		-42.54	-201.8	-216
25.9499	19.8943	-10.5528		-42.54	-201.8	-216
16.3643	21.8912	-65.7637		-42.54	-201.8	-216
-48.6155	8.94192	-61.4257		-42.54	-201.8	-38.7
2.37327	-84.0109	-11.5236		-42.54	-201.8	-38.7
42.8903	-57.9613	-68.7966		-42.54	-201.8	-38.7
31.6766	-12.4521	-25.4433		-42.54	-201.8	-38.7
23.5652	-37.4635	-45.7496		-42.54	-201.8	-38.7
1.40816	26.9304	57.0991		-42.54	-201.8	-38.7
6.67634	-63.3503	13.2243		-42.54	-201.8	-38.7
-23.5059	-40.5251	-31.3476		-42.54	-201.8	-38.7
-76.0345	-87.2746	23.1815		-42.54	-31.9	-38.7
38.2849	-60.0942	495.99		-42.54	-31.9	-58.9
34.8775	69.6038	-81.9362		-42.54	-31.9	-58.9
-42.8637	-54.9269	-87.2428		-42.54	-31.9	-58.9
10.9602	-63.5153	9.78283		-42.54	-31.9	-58.9
-17.9312	19.9061	12.5074		-42.54	-255.2	-58.9
67.1569	-57.878	-47.1299		-42.54	-26.9	-58.9
-39.4318	-42.1181	-36.4518		-42.54	-26.9	-58.9
15.3784	-34.0453	-31.9438		-42.54	-26.9	-21.9
-13.0803	33.1181	-135.928		-42.54	-26.9	-21.9
24.1059	-25.6763	-33.4637		-42.54	-26.9	-21.9
27.4937	20.04	-34.051		-533.69	-26.9	-21.9
39.6178	18.4202	-20.7383		-533.69	-26.9	-21.9
40.3151	28.2153	35.2042		-533.69	-26.9	-21.9
-48.8205	-14.7449	37.9402		-533.69	-26.9	-21.9
24.2163	-51.6316	58.4935		-533.69	-26.9	-21.9
29.8103	-50.2187	-23.6558		-533.69	-26.9	-21.9
0.546763	-37.7477	2.70142		-542.4	-26.9	-21.9
11.3588	-31.7232	10.4577		-542.4	-26.9	-21.9
54.122	-97.5511	-104.58		-146.96	-26.9	-21.9
-62.3124	-43.7013	-15.4265		-146.96	-26.9	-21.9
5.68714	-35.4255	-4.33454		-146.96	-26.9	-21.9
57.824	-81.0708	-66.0988		-146.96	-291.7	-21.9
2.72645	-17.8589	8.19605		-146.96	-291.7	-21.9
147.446	-21.7364	-10.2478		-146.96	-21.3	-21.9
2.94823	-94.6734	-25.7424		-146.96	-21.3	-21.9
18.6006	-137.862	-43.5661		-146.96	-21.3	-21.9
44.9977	-44.5576	-18.5805		-146.96	-21.3	-21.9
-24.3146	-89.6597	-45.8853		-159.53	-21.3	-21.9
42.369	-71.0303	-31.9057		-159.53	-21.3	-21.9
38.2646	-24.8735	39.224		-159.53	-21.3	-21.9
15.7611	-1.70479	-58.471		-159.53	-170.2	-21.9
33.654	-88.5484	-57.7236		-159.53	-170.2	-21.9
-18.7716	-31.0754	-35.9668		-654.06	-351	-21.9
-69.4261	26.3048	-54.5109		-654.06	-351	-21.9
16.2949	-54.5432	-8.57817		-654.06	-351	-21.9
38.9508	-38.5966	-0.726814		-654.06	-351	-21.9
3.11696	-13.3744	23.375		-654.06	-351	-21.9
-1.67458	-64.1385	-73.5299		-8.65	-21.9	-21.9
-33.131	-7.26176	-74.2492		-8.65	-21.9	-21.9
20.631	-5.81301	-61.6252		-8.65	-21.9	-21.9
-8.04972	-84.0942	19.9221		-8.65	-21.9	-21.9
35.1816	-47.6925	-65.0469		-8.65	-21.9	-21.9
-56.7109	62.6245	-37.9331		-8.65	-21.9	-21.9
-4.75479	-16.8426	-44.3807		-8.65	-21.9	-21.9
36.2895	-90.3413	-4.37109		-8.65	-21.9	-21.9
2.92464	-73.1513	-41.7265		-8.65	-21.9	-21.9
12.9945	17.8915	-21.9211		-8.65	-21.9	-21.9
-25.2581	-15.6276	207.395		-8.65	-21.9	-21.9
44.7812	-89.3523	-35.5971		-8.65	-21.9	-21.9
16.9254	12.9572	5.40119		-8.65	-21.9	-21.9
54.433	-49.4846	-65.0383		-8.65	-21.9	-21.9
42.5237	8.32932	-58.5886		-8.65	-21.9	-21.9
-59.4489	-19.1627	41.5665		-8.65	-21.9	-21.9
24.22	-1.37609	-5.23139		-8.65	-21.9	-21.9
-4.39149	67.4947	-1.06491		-306.29	-21.9	-21.9
-26.0169	20.4398	16.7043		-153.15	-21.9	-21.9
-1.98774	-68.6095	-14.285		-145.85	-21.9	-21.9
47.2876	28.9348	-68.5768		-145.85	-255.2	-21.9
10.0448	-28.6918	-25.8493		-145.85	-153.1	-21.9
39.4991	-92.8872	27.8803		-145.85	-153.1	-21.9
-67.268	-92.3803	-35.6421		-45.38	-153.1	-21.9
83.566	-10.098	-47.2875		-45.38	-153.1	-21.9
14.1242	-44.6428	-4.40121		-45.38	-153.1	-21.9
32.2682	-61.8042	-3.87873		-45.38	-153.1	-21.9
-0.495863	-71.0082	-21.2664		-45.38	-255.2	-21.9
33.187	-87.9815	-23.1578		-45.38	-510.5	-21.9
32.218	-69.6935	37.5143		-45.38	-510.5	-21.9
-59.5188	-11.3205	-51.9101		-45.38	-232	-102.1
3.36343	-27.0431	-32.9047		-45.38	-232	-795.8
-18.3019	-42.7493	-22.7255		-45.38	-232	-795.8
14.8561	-52.3866	-61.8794		-45.38	-446.7	-795.8
-42.7313	-108.986	-51.0129		-45.38	-255.2	-795.8
25.3103	-43.6716	38.0343		-45.38	-255.2	-795.8
-19.2627	32.903	-39.4925		-85.08	-324.9	-255.2
-19.9665	-175.927	-52.3085		-85.08	-324.9	-255.2
146.135	-105.487	-28.4916		-85.08	-324.9	-28.6
41.4679	-20.0432	-82.3434		-98.17	-109.4	-28.6
-3.10697	-35.8753	-4.93724		-98.17	-109.4	-28.6
15.7874	-36.0071	13.7583		-98.17	-316.5	-28.6
19.6468	-73.2595	-42.6463		-98.17	-316.5	-28.6
141.855	-111.599	-48.4957		-20.42	-316.5	-28.6
371.29	-43.8135	5.00231		-20.42	-316.5	-28.6
-26.8169	-32.0052	-68.272		-20.42	-316.5	-28.6
-54.0267	41.1713	-22.2646		-20.42	-316.5	-28.6
-29.0092	-35.9456	-38.8347		-20.42	-316.5	-28.6
4.91604	-11.5822	-83.2982		-20.42	-91.2	-28.6
5.21745	-52.1007	-9.60136		-20.42	-91.2	-28.6
5.54768	-24.3524	9.93922		-148.89	-91.2	-28.6
66.909	239.923	197.05		-148.89	-91.2	-28.6
18.1382	-27.0907	-8.04925		-148.89	-331.8	-28.6
-68.8082	-44.2501	-68.5815		-20.7	-331.8	-28.6
18.001	2.92105	-88.2747		-20.7	-331.8	-28.6
-46.8174	16.3826	-65.2483		-20.7	-287.2	-28.6
6.69601	-12.7882	14.2632		-20.7	-287.2	-28.6
-24.5809	-54.4156	-49.8823		-20.7	-297.8	-28.6
-71.7915	-101.368	-25.3463		-20.7	-297.8	-28.6
116.812	-39.9883	-75.9563		-20.7	-198.5	-28.6
16.7403	13.8894	-75.5521		-20.7	-198.5	-28.6
28.6829	-75.8254	5.44454		-20.7	-198.5	-28.6
-39.9684	-115.106	-25.747		-20.7	-6.3	-28.6
76.2443	-36.3227	1.48242		-20.7	-6.3	-28.6
-39.7401	-45.8852	-19.0625		-459.44	-6.3	-28.6
-12.4357	-109.82	-47.3029		-303.1	-6.3	-28.6
-95.936	8.14236	-31.5358		-303.1	-6.3	-28.6
-19.5018	-72.3829	-32.2991		-303.1	-6.3	-28.6
52.1409	-47.2737	-70.9095		-303.1	-6.3	-28.6
-3.43882	32.1489	-7.27957		-303.1	-6.3	-28.6
-48.2563	-39.0888	-33.0718		-149.82	-6.3	-28.6
-3.25162	-20.9955	-34.6348		-149.82	-6.3	-170.2
30.2181	64.6558	-76.1632		-149.82	-6.3	-170.2
-117.567	-11.2778	-70.4829		-149.82	-6.3	-170.2
-9.82345	-22.4993	-11.711		-149.82	-6.3	-170.2
-40.0667	-43.4406	-42.8929		-149.82	-6.3	-40.3
36.213	-40.3348	9.91475		-149.82	-6.3	-40.3
85.14	-133.865	-14.474		-149.82	-6.3	-40.3
-63.2898	10.6741	-8.47663		-149.82	-6.3	-40.3
39.8377	15.2767	-77.3541		-149.82	-6.3	-40.3
10.9697	25.9213	2.2005		-149.82	-6.3	-366.9
27.6067	-22.6679	-9.50674		-149.82	-6.3	-366.9
10.8764	-14.8464	2.82101		-149.82	-6.3	-366.9
36.4724	35.5733	19.8102		-565.18	-6.3	-366.9
-57.5772	158.927	-32.4631		-565.18	-6.3	-366.9
-71.415	-88.0339	-14.4558		-565.18	-6.3	-191.4
24.7241	-32.4188	-85.2663		-565.18	-6.3	-191.4
102.401	-47.9639	-63.9639		-565.18	-6.3	-12.9
42.3382	-141.553	-46.7445		-565.18	-6.3	-12.9
17.3647	-80.838	-30.3677		-565.18	-6.3	-12.9
1.15134	-50.5581	-17.0353		-565.18	-6.3	-12.9
38.0981	19.9878	-3.15118		-68.07	-6.3	-12.9
18.0623	-40.9326	4.50582		-68.07	-6.3	-12.9
38.7577	-85.907	-22.3774		-68.07	-6.3	-12.9
32.3156	-55.9965	-9.51194		-68.07	-6.3	-12.9
-28.3556	-34.4808	68.8972		-28.65	-6.3	-12.9
-12.3811	-54.7655	76.7621		-28.65	-6.3	-12.9
33.206	-65.5158	-53.5695		-28.65	-6.3	-12.9
26.8845	15.336	19.3082		-28.65	-6.3	-12.9
-43.7009	-61.2533	-47.9046		-28.65	-6.3	-12.9
39.4959	15.5691	7.65867		-28.65	-6.3	-12.9
3.82654	-70.0825	10.8777		-28.65	-6.3	-12.9
-14.9962	22.5928	-49.6782		-28.65	-6.3	-12.9
-6.75633	-41.2048	26.3177		-28.65	-6.3	-12.9
56.6266	-53.7052	-43.9429		-28.65	-6.3	-12.9
3.54934	-23.0114	-4.3616		-28.65	-6.3	-12.9
-69.2378	-29.8791	-57.6918		-28.65	-6.3	-12.9
17.8205	-13.0966	42.1296		-28.65	-6.3	-12.9
44.7119	1.24736	-74.1485		-28.65	-6.3	-12.9
123.226	-62.6206	-15.3125		-28.65	-6.3	-12.9
29.9593	-55.6892	-65.3487		-28.65	-6.3	-12.9
-33.5523	-31.2749	-22.6504		-28.65	-6.3	-12.9
66.1544	-40.8211	-65.9297		-28.65	-6.3	-12.9
19.1432	-36.5813	-43.828		-28.65	-6.3	-12.9
31.9161	-41.6166	-70.2736		-28.65	-6.3	-12.9
-72.9049	-14.1797	-53.267		-28.65	-6.3	-12.9
-18.2222	-26.6649	-0.516696		-28.65	-6.3	-12.9
-70.8684	-27.699	-76.1346		-28.65	-6.3	-12.9
93.8307	-104.935	-33.8594		-28.65	-6.3	-12.9
38.8836	-93.2336	6.65321		-28.65	-6.3	-12.9
7.90453	-10.38	-7.28699		-28.65	-6.3	-12.9
-2.44518	-12.5131	-92.8033		-28.65	-6.3	-214.9
43.6613	-9.37181	-52.5467		-28.65	-6.3	-214.9
-32.0072	-66.4902	-41.095		-714.69	-6.3	-214.9
52.7247	-60.0174	-59.4196		-95.72	-6.3	-214.9
-7.63238	-49.8754	-33.6093		-95.72	-6.3	-214.9
33.2464	-66.4497	4.48808		-595.57	-6.3	-638.1
-41.58	21.5141	39.0418		-34.81	-6.3	-638.1
39.5368	-126.232	42.1153		-34.81	-6.3	-89.3
-72.2218	44.4306	15.1819		-34.81	-6.3	-89.3
38.6702	20.7597	144.284		-34.81	-6.3	-89.3
49.1535	-74.0683	18.4457		-34.81	-6.3	-89.3
-14.6355	-33.0338	89.9315		-34.81	-6.3	-89.3
19.561	-30.4899	-29.8098		-34.81	-6.3	-89.3
31.2794	-17.4204	-92.797		-34.81	-6.3	-255.2
6.94593	17.7264	6.90282		-34.81	-6.3	-319.1
28.1273	-2.70082	-63.9583		-34.81	-6.3	-127.6
-49.7211	-62.8586	6.20061		-34.81	-6.3	-127.6
21.9159	-57.2967	543.804		-34.81	-6.3	-127.6
-26.6182	-33.0187	-49.1907		-34.81	-6.3	-127.6
26.4112	-49.1192	28.1921		-23.93	-6.3	-127.6
7.15314	0.992994	10.3836		-23.93	-6.3	-127.6
-42.898	-65.0909	-50.0991		-23.93	-6.3	-127.6
1.49717	-14.7272	-34.189		-23.93	-6.3	-127.6
-13.5673	-40.6675	-5.7975		-23.93	-69	-127.6
66.5433	13.7457	-16.299		-23.93	-69	-113.4
-8.47905	-112.694	226.053		-23.93	-69	-113.4
-7.17253	-12.2453	-40.7252		-23.93	-69	-113.4
-11.5547	-27.3127	-28.8119		-23.93	-69	-113.4
16.3015	-43.628	-20.8513		-48.29	-69	-113.4
266.132	-159.766	-0.637079		-48.29	-69	-105.1
263.702	-13.7871	-94.1097		-48.29	-69	-105.1
-41.8723	-44.0373	-71.5702		-48.29	-69	-105.1
20.3437	-17.6786	-38.1165		-48.29	-69	-105.1
-21.5075	-65.6926	-20.6412		-48.29	-69	-105.1
73.4772	-19.069	0.52097		-48.29	-19.6	-105.1
13.9828	-9.19066	-6.29622		-48.29	-19.6	-105.1
-8.88601	-27.8694	-39.0877		-48.29	-19.6	-105.1
29.4899	-44.1771	-37.6844		-48.29	-19.6	-105.1
15.1179	-71.1779	14.133		-48.29	-19.6	-105.1
-5.79675	-14.5227	63.1884		-15.31	-19.6	-61.3
-14.4112	-100.305	-38.0046		-15.31	-19.6	-61.3
20.577	-80.186	-26.6882		-15.31	-98.8	-61.3
48.6272	-93.3811	155.513		-15.31	-98.8	-61.3
26.8088	-16.3454	33.7169		-15.31	-98.8	-61.3
-7.42427	-22.474	-41.8817		-15.31	-98.8	-61.3
3.65068	37.3053	-28.155		-15.31	-98.8	-61.3
46.7812	-15.5496	-42.7443		-15.31	-98.8	-21.9
-8.57478	-52.6433	-82.7946		-15.31	-98.8	-21.9
29.8728	-22.4033	-5.45174		-15.31	-98.8	-21.9
-31.1941	-77.9107	7.91024		-15.31	-98.8	-21.9
-20.4797	11.9078	-45.3171		-15.31	-510.5	-21.9
-61.0186	6.10037	-16.4924		-15.31	-19.6	-21.9
39.7052	-74.5617	45.8178		-15.31	-19.6	-21.9
-15.9996	-52.59	-30.5783		-155.98	-19.6	-21.9
19.7387	-23.6824	55.7629		-155.98	-19.6	-21.9
35.8632	-68.2981	-36.7451		-155.98	-19.6	-21.9
-114.591	-112.945	-38.8744		-155.98	-19.6	-21.9
-28.746	-57.0181	10.9443		-155.98	-19.6	-21.9
34.1816	-54.4914	-46.1566		-157.07	-19.6	-21.9
35.2885	3.45291	-72.2837		-157.07	-19.6	-21.9
-34.8786	6.04269	-26.9486		-157.07	-19.6	-21.9
-0.463604	-42.9541	6.78808		-157.07	-19.6	-21.9
19.213	137.567	36.9345		-437.56	-118.4	-21.9
-86.4467	-57.7689	-13.3911		-437.56	-118.4	-21.9
67.1739	-53.8177	-91.6041		-437.56	-118.4	-21.9
-92.1091	-117.395	-13.6406		-437.56	-118.4	-21.9
15.7831	-19.6144	-66.6511		-55.49	-118.4	-21.9
30.098	-58.6573	2.25738		-55.49	-118.4	-21.9
38.349	6.82194	-30.4681		-55.49	-118.4	-21.9
-34.9648	148.501	-40.4645		-55.49	-118.4	-21.9
-7.9266	-86.3711	-27.4863		-55.49	-118.4	-21.9
-110.809	-43.245	1.70083		-55.49	-118.4	-21.9
-5.08372	-103.904	-27.0712		-55.49	-118.4	-21.9
-33.0799	-2.61112	-58.0791		-182.32	-118.4	-21.9
-9.5222	14.0494	-96.977		-182.32	-118.4	-21.9
-25.9866	-58.0282	-3.52416		-22.2	-118.4	-21.9
6.06268	82.4626	-22.4172		-22.2	-118.4	-21.9
38.7393	29.9026	-49.7823		-22.2	-118.4	-21.9
10.1098	-64.3051	-49.211		-22.2	-118.4	-21.9
46.1184	56.7266	360.151		-22.2	-118.4	-21.9
-27.8846	-35.8909	41.1021		-22.2	-118.4	-21.9
24.9281	-23.2039	24.0452		-22.2	-118.4	-21.9
57.4831	13.8131	-7.31033		-935.9	-64.9	-21.9
-50.9963	-74.7431	-49.216		-54.7	-64.9	-21.9
37.3576	-11.6016	-16.6621		-54.7	-64.9	-21.9
35.1338	-27.6688	10.8737		-54.7	-64.9	-21.9
-47.2993	-37.1718	-81.9958		-54.7	-64.9	-21.9
-47.7416	-29.7675	-46.859		-54.7	-64.9	-21.9
71.3925	20.272	-29.0661		-54.7	-64.9	-21.9
-19.6873	15.1967	19.0269		-54.7	-64.9	-21.9
56.7111	-19.796	183.11		-54.7	-64.9	-21.9
33.3609	-40.4205	-23.6125		-33.58	-64.9	-21.9
-30.6049	-83.4303	-21.4489		-33.58	-64.9	-21.9
-8.08531	-67.6125	-49.3162		-33.58	-64.9	-21.9
40.1375	-19.5018	4.23919		-33.58	-64.9	-21.9
23.1262	-74.7949	-32.5031		-33.58	-64.9	-21.9
1.60555	-4.4147	-30.7426		-33.58	-64.9	-21.9
2.12558	-76.0958	-5.18863		-33.58	-64.9	-21.9
30.3417	-31.2306	-44.1011		-33.58	-64.9	-21.9
-28.5	-13.7384	-25.7787		-33.58	-364.6	-21.9
3.05689	-2.78993	-4.28693		-33.58	-364.6	-21.9
28.1241	-80.2336	-40.2579		-33.58	-85.1	-21.9
39.2527	6.74716	5.45018		-306.29	-85.1	-21.9
7.58986	35.1554	-15.8543		-306.29	-85.1	-21.9
-10.9244	-98.5708	7.10317		-306.29	-85.1	-21.9
27.4401	-37.5325	-14.1259		-148.89	-85.1	-21.9
12.8856	-17.2614	35.8587		-148.89	-85.1	-135.1
20.8138	-2.54966	-31.1407		-148.89	-85.1	-135.1
-34.6797	50.0685	30.7933		-364.64	-303.1	-135.1
-12.7564	-42.8519	-47.7202		-364.64	-303.1	-135.1
51.6378	-38.8133	-41.2072		-58.9	-303.1	-135.1
-16.2386	-33.0521	-63.4158		-58.9	-303.1	-6.6
65.42	-23.552	-10.3664		-58.9	-303.1	-6.6
-38.9742	7.39232	-33.3322		-58.9	-351	-6.6
15.8734	-25.5327	762.209		-127.62	-351	-6.6
-62.4287	-38.8069	18.1799		-127.62	-187.2	-6.6
9.67937	36.4	-11.932		-29.87	-187.2	-6.6
-36.9975	-35.0208	0.709398		-29.87	-187.2	-6.6
14.4877	-72.2241	-42.2438		-29.87	-187.2	-6.6
-9.51434	-58.6199	12.8661		-29.87	-865.6	-6.6
19.2082	-8.55269	-43.192		-29.87	-865.6	-6.6
-15.4913	-51.5855	-12.223		-29.87	-865.6	-6.6
-54.6803	9.3791	-55.0165		-29.87	-865.6	-6.6
50.7934	7.04586	22.387		-29.87	-865.6	-6.6
-17.0957	-119.894	-1.55749		-29.87	-865.6	-6.6
-1.31587	-74.6912	-27.5041		-29.87	-865.6	-6.6
5.40835	-38.1886	-54.776		-29.87	-319.1	-6.6
-6.69054	-42.1729	-2.92407		-29.87	-319.1	-6.6
-38.773	-54.4403	-6.9171		-29.87	-127.6	-6.6
34.783	-30.9135	-33.1322		-29.87	-127.6	-6.6
-13.4168	-13.3305	-93.2185		-29.87	-85.1	-6.6
55.5707	-59.9667	27.6248		-29.87	-85.1	-6.6
-60.2725	-92.0255	-19.4046		-29.87	-127.6	-6.6
-13.3997	-28.9307	-13.9841		-29.87	-127.6	-5.6
-2.89848	7.30156	-25.2175		-29.87	-127.6	-5.6
26.9143	-6.66739	-53.1742		-29.87	-21.3	-5.6
-56.3478	-101.554	-74.4926		-29.87	-21.3	-5.6
29.5216	-39.7594	-61.8998		-29.87	-21.3	-5.6
19.0379	-26.4951	-44.7771		-29.87	-21.3	-5.6
83.9093	-21.2542	-45.5469		-29.87	-21.3	-5.6
51.718	-62.9924	-22.6958		-29.87	-21.3	-5.6
35.7278	-24.686	-10.8409		-29.87	-21.3	-5.6
-32.2723	14.3995	-26.4572		-29.87	-218.8	-5.6
-41.4511	-44.0852	-30.6756		-7.81	-218.8	-5.6
21.0981	72.8759	-81.2003		-7.81	-691.5	-5.6
-16.0403	-31.5657	-18.5878		-7.81	-691.5	-5.6
199.037	-11.2371	-41.7043		-7.81	-691.5	-5.6
-21.8178	-0.934066	331.527		-7.81	-691.5	-5.6
4.70898	-26.338	-59.9018		-7.81	-691.5	-5.6
-111.394	-75.9501	10.5697		-7.81	-691.5	-5.6
15.3681	31.2342	603.516		-7.81	-691.5	-5.6
17.2992	-22.2202	-8.74523		-7.81	-691.5	-5.6
22.9586	21.784	-39.0979		-7.81	-691.5	-5.6
12.7724	-14.3745	-58.9433		-7.81	-691.5	-5.6
-14.9203	-126.359	-24.8226		-7.81	-691.5	-5.6
31.3478	-26.1984	-36.2376		-7.81	-691.5	-5.6
20.6522	60.0157	-48.3886		-7.81	-691.5	-5.6
46.9922	-119.386	-38.3229		-7.81	-691.5	-5.6
41.6031	-0.490498	-62.1467		-7.81	-691.5	-5.6
-18.0659	-75.478	-41.2622		-7.81	-691.5	-5.6
-7.50058	14.3653	52.5989		-7.81	-119.1	-5.6
33.456	-40.1249	668.468		-7.81	-119.1	-5.6
-39.8604	-92.7983	180.137		-7.81	-119.1	-5.6
26.9226	-40.7402	-36.6058		-7.81	-119.1	-5.6
9.02896	-44.5414	-34.8778		-7.81	-119.1	-5.6
-32.8741	-3.23165	329.618		-7.81	-119.1	-5.6
57.7308	-45.6222	-18.8635		-7.81	-119.1	-5.6
19.1821	-42.6587	42.7312		-7.81	-119.1	-5.6
24.429	-51.02	56.175		-7.81	-119.1	-5.6
-49.0875	-46.8634	19.5604		-7.81	-510.5	-5.6
-8.44676	-39.202	-72.4534		-7.81	-510.5	-5.6
-17.0418	-18.9242	-48.3571		-9.45	-510.5	-5.6
-35.0545	-47.2637	-23.961		-9.45	-20.4	-71.6
5.33697	-34.4073	-21.5249		-9.45	-20.4	-71.6
-45.1422	8.74926	15.2315		-9.45	-20.4	-71.6
17.9882	-2.6708	99.1997		-9.45	-20.4	-71.6
48.3994	-14.349	93.0153		-9.45	-20.4	-71.6
-43.3379	-61.9767	-93.2623		-9.45	-20.4	-71.6
22.3796	-14.2572	-60.4003		-9.45	-20.4	-71.6
41.8704	-20.0627	-26.8225		-9.45	-446.7	-71.6
25.0739	-85.9167	-57.9532		-9.45	-446.7	-71.6
-13.5177	-123.451	-37.222		-9.45	-136.1	-71.6
-47.3998	18.8445	-22.2092		-9.45	-136.1	-71.6
7.50522	16.177	-37.8226		-9.45	-136.1	-71.6
-4.85285	-115.122	-46.3189		-9.45	-136.1	-71.6
-12.0132	-25.3873	-120.315		-9.45	-136.1	-71.6
24.4447	-19.9674	-72.4579		-86.89	-136.1	-71.6
-26.0015	15.0529	17.17		-86.89	-136.1	-71.6
73.7181	0.483353	-69.4849		-86.89	-136.1	-71.6
39.1538	-28.3798	-21.8256		-86.89	-136.1	-71.6
13.0058	56.9442	24.0063		-86.89	-72.3	-71.6
-9.62333	20.9621	-40.3425		-86.89	-72.3	-71.6
55.1805	-72.9659	39.6955		-86.89	-72.3	-71.6
-29.123	122.147	-69.81		-86.89	-72.3	-71.6
-18.8658	-171.919	288.645		-86.89	-72.3	-71.6
34.9071	9.2806	3.6686		-86.89	-72.3	-735.7
7.84687	-60.7831	-12.9092		-86.89	-72.3	-735.7
13.9775	-119.604	-40.6892		-86.89	-72.3	-735.7
36.221	6.98716	-48.4681		-86.89	-72.3	-735.7
-16.3282	-62.1403	22.6965		-11.1	-72.3	-735.7
-27.1832	117.836	101.631		-11.1	-72.3	-1191.1
1.13621	-49.4297	-1.93539		-11.1	-72.3	-619.9
-10.5192	-14.8492	-30.4995		-11.1	-72.3	-619.9
-49.999	-49.8793	-43.7583		-11.1	-72.3	-1063.5
-93.928	-112.863	261.03		-11.1	-72.3	-1063.5
39.4443	-77.7082	-2.15162		-11.1	-72.3	-893.4
34.1044	-52.5154	-50.667		-11.1	-72.3	-893.4
-26.8138	-92.5916	-38.9018		-11.1	-170.2	-159.5
-12.2777	-82.0735	-54.3438		-11.1	-170.2	-159.5
-1.46255	27.769	-68.457		-11.1	-170.2	-159.5
-0.845525	-21.3387	-53.6674		-11.1	-170.2	-159.5
16.7197	10.0753	-18.2708		-11.1	-53.7	-159.5
11.0094	-34.1627	-60.762		-11.1	-53.7	-978.4
28.9821	-61.1925	-1.23931		-11.1	-53.7	-978.4
32.3948	-43.0764	-59.3536		-11.1	-53.7	-324.9
9.98678	-85.2073	-68.5435		-11.1	-53.7	-324.9
22.9404	30.4867	-54.4917		-11.1	-397	-324.9
-40.4869	19.2355	15.1554		-11.1	-397	-16.2
30.3394	-2.7145	-31.8927		-11.1	-397	-16.2
43.0209	-25.1375	16.6251		-175.48	-397	-16.2
25.1596	-55.4974	302.187		-175.48	-397	-16.2
19.2356	-26.008	69.4352		-175.48	-201.5	-16.2
54.9592	-39.0826	-1.22289		-175.48	-201.5	-16.2
-36.7926	-47.4761	-69.9926		-175.48	-201.5	-16.2
17.2749	-31.0087	-28.9232		-55.49	-201.5	-16.2
-29.0559	-59.1312	-49.7453		-55.49	-201.5	-16.2
13.114	-50.1288	24.591		-55.49	-201.5	-16.2
-5.12581	-67.2619	-68.2069		-55.49	-201.5	-16.2
-68.3646	-96.9596	-8.9751		-55.49	-201.5	-16.2
20.5422	-84.9555	-40.5636		-55.49	-201.5	-16.2
-14.388	-63.1651	-9.95922		-55.49	-201.5	-16.2
-5.6571	-12.302	-55.9457		-93.59	-201.5	-16.2
-34.6311	-51.304	-56.6585		-93.59	-79.8	-16.2
53.4463	-30.717	-11.0924		-93.59	-79.8	-16.2
16.4902	-51.289	6.40727		-93.59	-79.8	-16.2
-30.7937	-44.9894	-76.6928		-93.59	-79.8	-16.2
35.9679	-38.8277	-41.9616		-93.59	-79.8	-16.2
-26.2412	12.1403	80.7012		-93.59	-79.8	-16.2
10.1797	44.7897	527.31		-93.59	-79.8	-16.2
-15.0204	-99.7152	-69.8707		-93.59	-79.8	-16.2
-7.10655	-29.085	-20.8239		-19.63	-79.8	-16.2
25.5976	-75.5808	83.6034		-19.63	-115.3	-16.2
-15.7505	-112.854	-8.96727		-19.63	-115.3	-16.2
-40.9084	-19.857	-19.88		-19.63	-115.3	-16.2
32.2159	32.2109	0.0241093		-19.63	-115.3	-16.2
29.9184	-39.9992	-32.8802		-19.63	-115.3	-16.2
-25.3379	43.0728	-18.1395		-19.63	-115.3	-16.2
-8.45246	8.46031	-4.58965		-19.63	-115.3	-16.2
73.2276	30.5055	-10.8607		-19.63	-115.3	-16.2
22.5607	-45.5553	-5.35594		-19.63	-115.3	-16.2
20.7325	26.0429	-69.3132		-19.63	-516.2	-16.2
-34.8866	-42.136	-25.0223		-19.63	-516.2	-16.2
-0.15962	-40.2905	285.831		-19.63	-516.2	-16.2
-24.8716	42.9435	119.296		-19.63	-516.2	-16.2
39.3884	-59.8625	2.70201		-19.63	-516.2	-16.2
38.7939	-20.765	19.1854		-52.21	-516.2	-16.2
176.525	-30.6549	-32.8214		-52.21	-516.2	-16.2
-25.3773	-16.4697	-64.1811		-52.21	-516.2	-16.2
-44.9171	-38.1959	-117.774		-52.21	-516.2	-16.2
-40.2288	-3.6303	-70.7002		-52.21	-516.2	-16.2
7.68582	-30.4908	-81.2915		-52.21	-516.2	-16.2
-3.31167	8.2665	-91.2943		-52.21	-516.2	-16.2
41.1394	-45.2928	17.6504		-52.21	-516.2	-37.3
6.94203	-29.7602	-27.4735		-52.21	-516.2	-37.3
-4.07293	9.60098	-7.22396		-52.21	-516.2	-37.3
-10.1457	-85.2854	-54.9626		-52.21	-516.2	-37.3
7.29017	-73.0294	-85.508		-52.21	-516.2	-37.3
34.8543	-10.5779	-55.2263		-52.21	-516.2	-37.3
26.7466	-12.9244	-58.0017		-25.16	-516.2	-37.3
35.0559	-35.8644	-48.6356		-25.16	-516.2	-37.3
-0.678161	-52.7942	235.693		-25.16	-516.2	-37.3
16.0184	-2.28878	-29.972		-25.16	-516.2	-37.3
29.9687	24.4657	-90.0631		-25.16	-516.2	-37.3
43.7677	-65.1248	-76.5111		-25.16	-516.2	-37.3
-36.5684	-50.7031	-5.88158		-25.16	-516.2	-37.3
10.3074	-27.978	-31.2271		-25.16	-516.2	-37.3
15.7404	1.80252	15.7131		-25.16	-255.2	-37.3
169.599	-70.2512	28.4393		-25.16	-255.2	-37.3
-75.8768	81.7013	5.53393		-25.16	-255.2	-37.3
-19.5022	18.7476	-35.4087		-25.16	-527.5	-37.3
30.6073	2.79639	-13.2487		-25.16	-527.5	-37.3
25.5247	-46.0734	-34.9083		-25.16	-527.5	-37.3
-33.897	-17.882	-55.2357		-25.16	-527.5	-37.3
17.2848	-49.8849	-33.8144		-25.16	-255.2	-37.3
3.82019	-66.3925	-59.9258		-25.16	-255.2	-37.3
62.8281	-32.8507	-10.0869		-25.16	-255.2	-37.3
-94.1238	-11.48	-66.206		-25.16	-255.2	-37.3
49.0507	-90.4177	-61.5389		-25.16	-255.2	-510.5
33.6427	-1.49841	-20.4931		-119.11	-255.2	-425.4
139.681	-24.7996	-25.2168		-119.11	-255.2	-425.4
48.2019	-18.745	174.599		-119.11	-354.5	-425.4
-33.8305	-20.2761	-30.2862		-119.11	-354.5	-333.8
-6.47712	-69.5938	-17.9122		-701.92	-354.5	-333.8
-17.4139	-30.6405	-23.7438		-170.16	-354.5	-333.8
47.5763	-104.539	479.592		-170.16	-354.5	-333.8
14.7036	28.5737	99.5042		-255.24	-255.2	-189.8
6.45488	-42.3085	23.2127		-221.95	-255.2	-189.8
82.6081	3.80511	-22.7303		-221.95	-255.2	-189.8
28.8122	18.6134	-8.78647		-221.95	-638.1	-189.8
-13.3663	-42.6724	-46.9381		-221.95	-474	-189.8
-50.9745	89.5035	-143.137		-221.95	-474	-189.8
65.1568	-96.0184	-31.6079		-221.95	-85.1	-189.8
22.3079	-13.5914	-20.4544		-221.95	-85.1	-189.8
11.9556	1.89104	-122.985		-25.52	-85.1	-189.8
26.296	18.7562	-29.9986		-25.52	-85.1	-189.8
25.2713	48.7044	23.7348		-25.52	-85.1	-189.8
-0.253991	-37.346	-53.6169		-25.52	-85.1	-14.6
37.2697	-70.2731	-22.8429		-25.52	-85.1	-14.6
13.1766	-50.6145	-52.6912		-25.52	-19.6	-14.6
66.1626	-91.0838	-22.224		-25.52	-19.6	-14.6
-55.9875	-15.0496	-63.1389		-25.52	-19.6	-14.6
52.5727	-44.7609	-27.3999		-25.52	-19.6	-14.6
13.0261	-34.3847	-41.3729		-116.02	-19.6	-14.6
50.1622	-77.7878	13.8341		-116.02	-19.6	-14.6
-1.15435	3.60373	-9.11287		-116.02	-19.6	-14.6
-29.415	-38.2756	-6.2086		-401.1	-85.1	-14.6
-24.5386	33.0409	-30.9392		-401.1	-85.1	-306.3
127.74	-43.6291	-68.8989		-340.33	-85.1	-306.3
-57.1771	12.3271	-49.7452		-340.33	-12.8	-306.3
45.3076	-41.5041	-111.338		-340.33	-12.8	-22.5
26.0496	-81.5702	-85.8667		-340.33	-12.8	-22.5
-9.7891	-97.2709	-74.7764		-340.33	-12.8	-22.5
-63.2309	-70.3619	-25.8404		-340.33	-12.8	-22.5
11.0543	-48.2106	-14.8017		-574.3	-12.8	-22.5
6.91066	-67.4932	-15.1282		-574.3	-12.8	-22.5
-5.18404	-69.2253	-62.9311		-574.3	-12.8	-22.5
-131.098	-10.8259	-33.2776		-574.3	-12.8	-22.5
21.213	-44.2264	10.7016		-574.3	-12.8	-22.5
35.5687	-38.6248	236.274		-9.45	-12.8	-22.5
25.9424	-12.8222	-28.0454		-9.45	-153.1	-30
34.8038	177.895	192.763		-9.45	-153.1	-30
56.2672	-5.37032	6.51406		-9.45	-153.1	-30
-5.16443	-62.3426	36.71		-9.45	-79.8	-30
1.83511	-8.24779	10.9842		-9.45	-79.8	-30
-22.3192	-20.6862	-2.83309		-9.45	-79.8	-148.9
19.2723	-60.2464	-25.4814		-9.45	-79.8	-148.9
-2.28227	-25.3853	91.1404		-9.45	-79.8	-148.9
-11.2657	-0.0228889	-104.814		-9.45	-26.9	-148.9
52.934	-1.38599	-15.172		-9.45	-26.9	-148.9
29.912	-25.8666	-66.7993		-9.45	-26.9	-148.9
-51.67	-32.1084	24.5521		-9.45	-26.9	-148.9
3.22481	-35.4582	-24.5374		-9.45	-26.9	-38.3
-12.0263	-20.6701	-5.52433		-9.45	-382.9	-38.3
21.3484	-98.5727	-60.1711		-44.57	-382.9	-38.3
55.4371	-36.1676	23.5585		-44.57	-816.8	-38.3
197.376	-18.489	-29.7429		-44.57	-816.8	-38.3
12.6684	-42.0957	-64.0384		-44.57	-816.8	-38.3
0.341539	-25.1948	1.31285		-44.57	-816.8	-127.6
-23.0932	-95.2632	-23.2985		-44.57	-816.8	-127.6
-10.8996	-17.2844	-100.946		-44.57	-816.8	-127.6
-17.7068	-40.5126	-32.4262		-44.57	-239.8	-127.6
77.3886	27.9697	-0.817598		-44.57	-239.8	-127.6
0.385053	39.5857	46.1842		-44.57	-239.8	-290.1
-10.3515	-7.67172	33.1482		-44.57	-239.8	-290.1
31.8206	-5.50048	-37.1493		-44.57	-239.8	-290.1
-37.6338	5.23517	-100.321		-44.57	-239.8	-290.1
10.1573	-86.5155	-50.8698		-44.57	-239.8	-290.1
-11.0092	-52.7305	5.02614		-44.57	-239.8	-290.1
10.8326	13.2047	2.38434		-44.57	-239.8	-1217.3
46.8903	-40.5411	-43.1995		-44.57	-465.4	-1217.3
33.8112	-13.5725	-76.514		-44.57	-465.4	-1217.3
31.8407	-15.6337	-9.65063		-127.62	-465.4	-1217.3
-52.087	33.9759	-61.2239		-127.62	-465.4	-1109
-28.4076	-86.0499	60.361		-127.62	-465.4	-1109
0.294132	-30.5177	-51.855		-127.62	-266.8	-1109
-22.7135	-91.2037	-2.31593		-127.62	-266.8	-1109
-7.67017	11.3323	260.064		-127.62	-266.8	-1109
-1.8148	-76.972	-47.0683		-335.85	-266.8	-1109
-8.17542	2.08236	-5.99685		-335.85	-266.8	-1109
48.3156	9.78107	-5.39373		-335.85	-266.8	-1109
-44.2009	-45.128	-71.4413		-335.85	-68.1	-290.1
-36.6181	-50.1683	-16.8507		-335.85	-68.1	-290.1
-45.6614	171.629	67.283		-212.7	-68.1	-290.1
2.69386	-20.3965	-12.15		-212.7	-68.1	-290.1
28.9006	-64.4937	-25.8591		-212.7	-243.1	-290.1
13.8029	-23.1165	-67.2299		-212.7	-243.1	-290.1
29.5723	-84.7076	-18.44		-212.7	-243.1	-37.4
-0.469985	23.1384	9.90268		-401.1	-243.1	-37.4
-31.1987	-51.952	98.0862		-401.1	-243.1	-37.4
-5.37088	-41.5721	4.6971		-401.1	-243.1	-37.4
-31.0375	-73.4041	-69.6839		-401.1	-243.1	-37.4
80.1064	-35.2957	-45.4308		-401.1	-243.1	-37.4
21.2564	-3.30607	-13.9947		-401.1	-243.1	-37.4
23.5338	-38.0271	-51.6739		-401.1	-243.1	-37.4
33.2312	-44.1127	-30.1938		-401.1	-243.1	-37.4
-66.9068	-2.39663	28.3263		-226.88	-243.1	-37.4
-37.409	-47.2574	-49.8117		-226.88	-240.9	-37.4
38.1531	-95.0151	-24.6854		-226.88	-240.9	-37.4
-37.2072	-16.0402	-72.357		-106.35	-240.9	-232
54.0498	17.9637	3.90697		-106.35	-240.9	-232
-43.5252	-11.6262	-53.5269		-106.35	-240.9	-232
-55.5173	-7.52057	-21.367		-106.35	-240.9	-11.6
3.6374	77.6937	-23.2118		-106.35	-240.9	-11.6
-7.79608	24.1122	3.40678		-106.35	-240.9	-11.6
520.821	-44.5798	-54.0284		-106.35	-240.9	-11.6
95.8882	-47.1478	-55.047		-106.35	-240.9	-11.6
14.9018	-20.3252	-75.8703		-106.35	-240.9	-11.6
59.4113	-31.4568	-33.8537		-106.35	-240.9	-11.6
8.81538	-60.9025	-35.5331		-106.35	-240.9	-11.6
-69.6681	-2.20838	-14.258		-106.35	-240.9	-11.6
52.5744	-31.0317	20.1201		-106.35	-240.9	-11.6
149.481	-124.631	-1.70799		-106.35	-240.9	-11.6
-1.09823	-71.8369	-11.7566		-106.35	-240.9	-11.6
-28.4493	-191.851	-31.6114		-106.35	-240.9	-11.6
122.779	16.3048	-61.8577		-106.35	-240.9	-140
52.3954	221.372	-6.80717		-155.98	-240.9	-140
-16.9287	-5.86887	-45.4576		-155.98	-54	-140
27.9582	44.6875	-2.66085		-155.98	-54	-140
-45.2191	2.67359	-14.2573		-155.98	-54	-140
-25.2575	-22.5592	11.1496		-155.98	-54	-140
-43.8121	2.29225	-29.5838		-29.45	-54	-140
43.1155	-42.9436	-47.4668		-29.45	-54	-140
34.5635	12.2622	-76.4329		-29.45	-54	-140
-58.8209	155.84	-5.31749		-29.45	-54	-40.5
-3.51021	5.46853	203.52		-29.45	-54	-40.5
-22.9376	135.935	-41.6221		-29.45	-54	-40.5
0.900087	-27.4302	-38.3594		-29.45	-54	-40.5
-13.8565	-18.2621	-14.15		-788.94	-54	-40.5
-4.04383	-0.938897	-10.8888		-788.94	-54	-40.5
14.1536	-51.7086	-5.61077		-788.94	-54	-40.5
-21.5879	-27.347	-18.8738		-51.66	-54	-40.5
-66.391	-69.6521	-57.8874		-51.66	-688.1	-40.5
-11.1468	-9.07979	-2.98176		-51.66	-688.1	-40.5
13.3572	-92.1663	16.1297		-51.66	-688.1	-40.5
-19.862	118.285	398.929		-51.66	-688.1	-40.5
-33.2019	-70.4021	-40.3539		-51.66	-688.1	-40.5
-9.43875	-36.0248	-35.6496		-51.66	-688.1	-40.5
-1.73757	-24.2417	-31.4188		-51.66	-688.1	-40.5
60.6473	-22.5671	-5.53512		-51.66	-471.2	-40.5
-43.3182	-43.6218	-16.3448		-51.66	-471.2	-40.5
58.5091	-83.1349	-73.2355		-51.66	-471.2	-40.5
18.5168	-0.825686	167.298		-51.66	-471.2	-40.5
-34.5931	15.7876	-2.02374		-51.66	-92.8	-40.5
25.9487	9.21687	-8.30416		-51.66	-92.8	-40.5
64.8849	-62.5428	32.8742		-51.66	-92.8	-40.5
29.7369	-67.5244	-50.1483		-51.66	-20.7	-40.5
-31.671	-18.5465	-37.8557		-51.66	-20.7	-40.5
5.58922	-31.5743	-22.6426		-51.66	-20.7	-40.5
132.902	-37.3239	-32.4692		-51.66	-20.7	-40.5
9.50365	-19.6488	23.5837		-51.66	-20.7	-40.5
148.995	-10.5237	80.1638		-51.66	-20.7	-40.5
30.4971	-15.9948	200.572		-51.66	-20.7	-40.5
0.273489	-17.7001	-81.4905		-51.66	-20.7	-40.5
14.9442	-48.3503	-31.145		-51.66	-20.7	-40.5
43.6007	-29.138	-13.2811		-198.52	-20.7	-40.5
-25.3243	-3.22995	3.11569		-198.52	-20.7	-40.5
-56.9119	-109.466	-25.3513		-198.52	-351	-40.5
-2.49105	-15.1268	-40.7547		-191.43	-351	-40.5
13.0744	-48.2453	8.98167		-13.43	-23.2	-40.5
220.71	-51.0593	-58.0435		-13.43	-23.2	-40.5
-24.0842	-58.1087	41.2769		-13.43	-23.2	-40.5
28.3564	-70.7639	-15.7194		-13.43	-23.2	-40.5
-31.2849	-28.7703	157.436		-13.43	-23.2	-40.5
42.1385	-32.8738	-15.1132		-13.43	-23.2	-40.5
-3.77077	-40.5632	13.6131		-13.43	-23.2	-40.5
36.4214	9.42814	1.6759		-13.43	-23.2	-40.5
7.07417	-80.9435	96.539		-13.43	-23.2	-40.5
-61.6526	7.64207	7.68639		-13.43	-116	-40.5
9.66528	53.357	-11.5653		-13.43	-116	-40.5
-18.1858	-43.988	11.4217		-13.43	-116	-40.5
-16.5862	-62.0621	-41.4504		-13.43	-147.8	-40.5
88.2465	-104.675	-30.3621		-13.43	-147.8	-40.5
27.8908	-70.6758	-27.1519		-13.43	-147.8	-40.5
35.1567	11.8427	-19.7365		-13.43	-147.8	-40.5
12.9241	-86.8355	-19.0418		-76.57	-147.8	-40.5
-41.7152	-36.8173	-12.0164		-76.57	-31.1	-40.5
-10.9671	-68.9683	39.0001		-76.57	-31.1	-40.5
5.11001	7.16243	-21.926		-8.8	-31.1	-40.5
61.2981	32.0449	-40.7521		-8.8	-31.1	-40.5
-60.0263	-40.7407	-22.9494		-8.8	-31.1	-40.5
-13.9649	-66.2554	-18.465		-8.8	-31.1	-40.5
-60.26	-68.6941	-37.7321		-8.8	-31.1	-40.5
-11.5746	26.2668	27.5841		-8.8	-31.1	-40.5
-55.1449	-25.2422	-35.0869		-8.8	-31.1	-40.5
-48.0406	-23.6331	116.142		-8.8	-31.1	-40.5
-18.885	-37.7576	-3.12098		-8.8	-31.1	-40.5
22.3659	25.861	-31.9445		-8.8	-31.1	-40.5
4.81525	-32.8095	21.0698		-8.8	-31.1	-40.5
-1.93999	-88.3929	7.86672		-8.8	-31.1	-40.5
4.16923	41.9097	-2.66607		-8.8	-31.1	-40.5
53.6243	-37.9281	-11.2082		-8.8	-31.1	-40.5
66.966	-9.19312	-30.677		-8.8	-31.1	-40.5
-94.5641	-0.781054	28.0699		-8.8	-31.1	-40.5
-12.4688	-39.4396	-60.0632		-8.8	-31.1	-40.5
206.083	-23.2486	-92.9372		-170.16	-31.1	-40.5
6.4845	-49.3516	61.9795		-170.16	-31.1	-40.5
2.02082	-1.64253	-52.987		-170.16	-31.1	-40.5
-40.2021	14.3163	-34.2838		-8.1	-31.1	-40.5
26.9857	-27.5381	6.47024		-8.1	-31.1	-40.5
-30.5956	-61.2175	-52.5596		-8.1	-31.1	-67.2
16.4124	-35.0444	-80.6223		-8.1	-31.1	-67.2
25.2152	-56.2384	-9.61057		-8.1	-31.1	-67.2
-2.99511	160.534	20.2971		-8.1	-31.1	-67.2
-14.1448	-47.8929	-17.8742		-8.1	-31.1	-67.2
-2.51781	-52.0675	-22.2198		-8.1	-31.1	-67.2
60.4083	-51.3148	-42.1413		-8.1	-31.1	-67.2
4.05561	-17.3645	-84.823		-8.1	-31.1	-67.2
-119.064	-49.6161	-5.03088		-8.1	-31.1	-67.2
13.4964	-18.8755	-7.74079		-8.1	-139.2	-67.2
50.2187	26.3901	13.7157		-8.1	-139.2	-67.2
19.9974	-123.813	-30.8991		-8.1	-139.2	-67.2
22.4854	-71.5488	-21.4204		-8.1	-102.1	-67.2
140.494	17.3363	-48.0135		-8.1	-102.1	-67.2
-8.91156	-37.0372	-101.548		-8.1	-102.1	-67.2
19.8268	-6.05746	-7.92118		-8.1	-102.1	-67.2
-27.7678	64.0021	-30.3346		-170.16	-268.7	-110.6
13.2673	-75.8986	3.84767		-170.16	-268.7	-110.6
-147.034	10.7753	-54.0059		-510.49	-268.7	-110.6
32.8878	-6.70422	27.2715		-510.49	-268.7	-110.6
387.619	-28.5006	-73.068		-1042.25	-268.7	-110.6
34.8353	-58.8077	-73.2503		-1042.25	-21.3	-110.6
-12.4566	-104.983	-29.3382		-1042.25	-21.3	-110.6
75.7045	-47.8654	-11.7467		-255.24	-21.3	-110.6
-37.9215	-65.3163	-26.7852		-255.24	-21.3	-110.6
48.785	-23.7735	1.00876		-255.24	-21.3	-40.3
-32.4951	-5.10155	-4.56306		-59.36	-21.3	-40.3
2.87909	-41.0949	-71.0733		-59.36	-21.3	-40.3
21.8054	47.8748	-3.85023		-59.36	-222	-40.3
17.3199	-23.1571	-69.2628		-59.36	-222	-40.3
-33.0752	-91.5713	2.63313		-59.36	-222	-40.3
-19.4407	21.4382	0.931369		-59.36	-222	-40.3
15.6443	-47.1445	22.2796		-59.36	-222	-40.3
-1.4432	-99.3512	-55.8797		-59.36	-222	-40.3
57.3328	-0.779967	-30.6614		-59.36	-222	-40.3
38.6122	-83.2438	7.32509		-59.36	-82	-40.3
-22.1665	-11.4856	152.682		-59.36	-82	-312
14.34	32.313	69.2742		-59.36	-82	-312
81.7985	-46.1823	-36.7735		-11.1	-82	-312
59.981	-6.91836	-14.2557		-11.1	-82	-30.9
-52.8408	-7.21451	-23.2644		-11.1	-82	-30.9
0.743276	-80.4843	20.3933		-11.1	-82	-30.9
87.0222	6.69746	-63.2019		-11.1	-82	-30.9
-41.0132	-14.6247	5.11918		-11.1	-255.2	-30.9
62.4332	-33.7749	-17.5493		-11.1	-255.2	-30.9
29.4502	-83.859	-57.1578		-11.1	-255.2	-30.9
10.7359	-38.9302	9.43644		-11.1	-425.4	-30.9
48.8136	-21.1879	126.457		-11.1	-42.5	-30.9
28.292	-55.579	27.8824		-11.1	-42.5	-175.5
20.5243	-55.3321	-66.897		-11.1	-42.5	-175.5
21.8994	-25.4317	-57.6518		-11.1	-42.5	-175.5
42.3305	-33.6501	-22.4497		-11.1	-42.5	-175.5
22.5259	-12.5856	-23.0636		-11.1	-42.5	-175.5
-31.3673	-144.277	-29.2703		-11.1	-42.5	-538.9
32.6335	-44.133	21.2905		-11.1	-42.5	-538.9
-3.75305	-74.1403	-31.7009		-11.1	-42.5	-538.9
-0.0760998	8.85746	195.684		-11.1	-42.5	-510.5
-23.8912	-33.1638	106.882		-11.1	-42.5	-39.3
-48.3216	-64.6378	-25.2468		-11.1	-42.5	-39.3
161.249	-66.7342	-11.963		-11.1	-42.5	-39.3
0.641595	-31.8187	-31.8294		-11.1	-42.5	-39.3
38.4288	-26.0497	-1.63898		-11.1	-78.1	-39.3
63.5968	-15.0804	257.343		-11.1	-78.1	-39.3
38.8483	48.4669	83.0704		-11.1	-78.1	-39.3
-0.117869	-90.3246	-19.1606		-85.08	-78.1	-440.9
-30.9229	-77.5286	265.298		-85.08	-78.1	-440.9
68.9488	-100.489	-85.9499		-85.08	-78.1	-440.9
92.4487	-54.3508	-27.1875		-5.46	-78.1	-92.8
-34.2176	-27.2967	-19.1348		-5.46	-78.1	-92.8
-58.6931	72.7025	-29.2244		-5.46	-78.1	-92.8
-52.5711	25.7192	27.3756		-5.46	-78.1	-548.3
2.87552	-104.263	237.241		-5.46	-78.1	-548.3
-39.9938	-86.0129	183.752		-5.46	-78.1	-548.3
40.7128	30.1698	-56.7815		-5.46	-78.1	-548.3
-25.7598	-30.4112	-3.16495		-5.46	-78.1	-548.3
-8.78464	-8.98832	0.12098		-5.46	-229.7	-548.3
102.344	-16.7312	-24.5123		-5.46	-229.7	-548.3
15.2598	22.5625	-73.7021		-5.46	-229.7	-548.3
16.5631	-34.5748	21.2418		-5.46	-364.6	-71.6
29.8125	52.7603	27.525		-5.46	-364.6	-71.6
10.704	-64.9242	34.8592		-5.46	-68.1	-71.6
4.27767	-32.6258	-40.103		-5.46	-68.1	-71.6
147.597	-60.5105	-39.5016		-5.46	-68.1	-71.6
-12.9189	13.1369	-3.11275		-5.46	-68.1	-71.6
11.0902	-26.0484	-73.9006		-5.46	-574.3	-71.6
252.852	-2.62559	-20.046		-5.46	-204.2	-71.6
4.73107	-40.4833	67.2118		-5.46	-204.2	-71.6
-10.0651	-44.4238	12.8239		-5.46	-204.2	-71.6
-11.894	-23.3496	593.18		-5.46	-204.2	-71.6
40.4071	91.8047	20.9454		-5.46	-157.1	-71.6
41.1983	-99.742	5.28873		-5.46	-157.1	-71.6
-9.70502	-13.8816	0.40379		-5.46	-157.1	-71.6
-31.876	23.0591	21.2185		-5.46	-157.1	-71.6
46.6864	-50.0926	-53.8385		-5.46	-157.1	-71.6
-0.205773	53.24	-25.8979		-5.46	-157.1	-99.9
-3.23455	29.4913	27.6444		-5.46	-157.1	-99.9
67.9619	-12.5779	2.42745		-5.46	-437.6	-99.9
30.1965	31.9727	-15.0926		-5.46	-437.6	-99.9
-42.4916	14.8047	-19.8017		-5.46	-510.5	-99.9
26.1449	-109.589	24.6956		-5.46	-314.1	-99.9
-27.0379	-71.037	-48.374		-5.46	-314.1	-99.9
1.16477	-57.6045	-43.0495		-5.46	-314.1	-99.9
57.577	-106.422	-13.6391		-5.46	-314.1	-99.9
-17.1188	-124.282	-23.1417		-5.46	-319.1	-99.9
35.0877	-1.15857	-20.2939		-5.46	-319.1	-99.9
-15.3128	3.25993	114.627		-5.46	-804.4	-99.9
-98.3086	-74.7373	-21.1775		-5.46	-804.4	-99.9
19.3131	-15.4425	-2.49275		-5.46	-804.4	-99.9
5.88514	-1.62501	70.2804		-5.46	-804.4	-99.9
21.5896	2.9831	29.6689		-5.46	-804.4	-99.9
34.5151	-19.6196	85.5383		-5.46	-804.4	-99.9
59.1414	-58.2515	-31.1558		-5.46	-804.4	-99.9
53.1788	-49.0789	-21.938		-5.46	-804.4	-99.9
-94.993	2.40145	-70.3388		-5.46	-804.4	-99.9
59.8757	7.13394	-53.7508		-5.46	-272.3	-99.9
-1.00138	-38.7792	-50.2218		-5.46	-272.3	-99.9
36.438	-20.9692	-89.2872		-5.46	-272.3	-99.9
1.34976	-69.0685	-4.89241		-5.46	-272.3	-99.9
-38.7987	13.2269	-66.9035		-5.46	-239.3	-99.9
33.0016	39.7688	-13.7282		-5.46	-239.3	-99.9
2.60458	-55.3456	-18.944		-5.46	-239.3	-99.9
-36.7787	-31.67	-14.346		-71.79	-239.3	-62.1
75.0504	-44.9814	-33.8356		-71.79	-239.3	-62.1
19.789	-62.5552	5.11195		-71.79	-18.9	-62.1
-37.6203	-8.01584	16.4564		-71.79	-18.9	-62.1
-61.6782	-19.013	-53.1688		-71.79	-18.9	-62.1
2.46258	1.11448	-9.46907		-71.79	-18.9	-62.1
25.3159	-38.4205	-23.0966		-71.79	-18.9	-62.1
-54.7821	-5.85419	-37.4265		-71.79	-18.9	-62.1
15.7954	-1.00277	3.24935		-71.79	-18.9	-62.1
20.7361	-93.4019	-43.2709		-102.1	-18.9	-62.1
-56.3508	-2.55979	-44.8262		-5.7	-467.9	-62.1
-67.8965	94.4263	29.6995		-5.7	-467.9	-44.7
-52.6753	-37.8821	77.7406		-5.7	-94.6	-44.7
1.62106	39.016	11.3227		-5.7	-94.6	-44.7
38.8775	29.7081	-83.5168		-5.7	-94.6	-44.7
31.7871	-52.6607	-57.0621		-5.7	-94.6	-44.7
47.7959	-39.6711	-65.1382		-5.7	-94.6	-44.7
-22.4606	-56.24	-11.664		-5.7	-94.6	-44.7
43.8166	-114.209	13.0752		-5.7	-94.6	-44.7
0.940216	-47.2979	47.6796		-5.7	-94.6	-44.7
-29.099	-39.4007	-46.5592		-5.7	-94.6	-44.7
29.9427	4.86478	-53.4931		-5.7	-94.6	-44.7
-81.2837	-63.3586	-57.8897		-5.7	-94.6	-680.7
-40.6806	27.4196	-74.2343		-5.7	-94.6	-117.8
-89.5547	-23.7805	12.5976		-5.7	-94.6	-117.8
-34.03	-37.5716	-17.4398		-5.7	-94.6	-117.8
-49.1428	-67.4759	-36.3062		-5.7	-94.6	-117.8
23.7582	38.0357	-120.031		-5.7	-94.6	-95.7
-35.7888	-61.288	21.6798		-5.7	-94.6	-95.7
5.59646	-57.3109	-41.2111		-5.7	-94.6	-223.3
33.6268	-110.943	3.18422		-5.7	-94.6	-223.3
19.6079	-71.8469	-67.9717		-5.7	-94.6	-164.1
40.2029	-10.958	-37.4394		-5.7	-94.6	-164.1
-33.3671	-66.3675	-6.32677		-5.7	-94.6	-164.1
2.63043	-30.9146	-35.0307		-5.7	-94.6	-164.1
65.5778	86.2722	-21.8144		-5.7	-94.6	-164.1
42.1569	56.4946	-39.8959		-5.7	-94.6	-164.1
-115.776	-51.6025	56.8446		-5.7	-36.5	-164.1
24.9879	-69.1232	-21.0095		-5.7	-36.5	-164.1
-20.3915	-56.7507	-34.6403		-5.7	-36.5	-164.1
-15.6717	-7.29888	-27.6462		-5.7	-36.5	-164.1
15.6262	-20.8752	60.4181		-5.7	-36.5	-164.1
-14.2357	-97.1818	116.94		-5.7	-36.5	-164.1
-98.3595	-7.53515	-36.4792		-5.7	-36.5	-79.8
79.878	-66.1444	-55.7106		-5.7	-36.5	-79.8
21.5856	-76.1135	-0.063358		-5.7	-36.5	-79.8
14.7175	-62.5166	-1.9806		-5.7	-36.5	-79.8
-13.3265	-66.1615	-4.31265		-5.7	-36.5	-79.8
51.768	-36.8237	31.3621		-5.7	-36.5	-79.8
28.5787	-50.4979	-77.1421		-5.7	-36.5	-79.8
-70.2449	-74.8753	46.1991		-5.7	-36.5	-79.8
32.3594	-68.2354	-40.1451		-5.7	-36.5	-79.8
-74.6319	25.6675	5.2933		-5.7	-36.5	-153.1
-54.4108	34.9448	-1.44286		-5.7	-36.5	-153.1
218.379	-24.9039	-64.1108		-5.7	-36.5	-153.1
-52.8691	-37.1005	-56.6312		-5.7	-36.5	-153.1
28.2505	-5.0822	5.84516		-5.7	-36.5	-78
9.06346	25.2023	11.1523		-5.7	-36.5	-78
54.5466	-14.9971	-3.48038		-5.7	-36.5	-78
22.994	-72.4608	-39.7801		-5.7	-97.2	-78
19.5602	-54.9199	-49.983		-5.7	-97.2	-78
-1.01098	244.296	-71.9854		-7.89	-97.2	-78
10.0611	-92.0012	164.342		-7.89	-97.2	-78
0.869114	-29.7455	-32.9168		-7.89	-97.2	-78
-37.1036	-19.9269	-35.2777		-7.89	-97.2	-78
14.6651	-59.0937	-36.8872		-7.89	-18.2	-78
-71.5176	-71.6792	62.7396		-7.89	-18.2	-626.5
-13.1729	-7.4816	-77.9033		-7.89	-18.2	-626.5
38.7233	-77.7262	-61.9488		-7.89	-18.2	-626.5
47.1766	-3.22769	-4.98764		-7.89	-18.2	-212.7
-0.704924	-45.6747	1.27204		-7.89	-18.2	-212.7
-33.5816	-6.00073	-76.9504		-7.89	-18.2	-212.7
36.2824	20.9684	202.322		-7.89	-18.2	-212.7
23.6278	-80.5969	-32.5989		-7.89	-18.2	-212.7
1.86066	-67.4645	-54.6672		-7.89	-18.2	-127.6
34.7036	-46.2083	34.8743		-7.89	-18.2	-127.6
310.032	63.9761	-77.4641		-7.89	-18.2	-127.6
125.794	-4.2034	-36.4543		-7.89	-18.2	-127.6
-11.6258	-60.4547	-13.356		-7.89	-18.2	-1276.2
8.47939	12.9708	23.7529		-7.89	-18.2	-226.9
2.45964	-89.1466	-34.3957		-7.89	-18.2	-226.9
32.0322	-14.277	-40.8332		-7.89	-18.2	-226.9
86.6748	-58.7845	-21.9232		-7.89	-18.2	-150.8
21.5495	-2.44515	9.96481		-7.89	-18.2	-150.8
-6.05283	-60.1114	18.2404		-7.89	-18.2	-150.8
-53.1337	8.21774	-82.8344		-7.89	-18.2	-150.8
-50.5512	44.9849	-17.9026		-7.89	-18.2	-150.8
-38.8152	-35.2268	-1.65924		-7.89	-18.2	-150.8
150.113	14.9052	-47.9066		-7.89	-18.2	-111
10.8734	-82.1761	-49.2849		-199.94	-18.2	-111
-50.9332	-128.85	-50.9437		-199.94	-18.2	-111
30.3855	-70.4818	-85.9914		-199.94	-18.2	-111
-1.41646	-43.5673	-17.1317		-199.94	-18.2	-111
-56.0893	-74.5977	15.208		-199.94	-18.2	-111
13.0626	-17.5173	-22.6039		-199.94	-18.2	-111
42.3757	44.2344	-39.0459		-199.94	-18.2	-217.4
26.5556	-43.5649	-16.1486		-199.94	-18.2	-217.4
-2.42881	-26.8669	-10.199		-199.94	-18.2	-217.4
53.7801	24.4469	-7.43199		-199.94	-18.2	-217.4
15.173	-28.5326	-4.54189		-199.94	-18.2	-217.4
7.17364	-79.8763	4.90602		-199.94	-18.2	-217.4
-21.3972	-111.577	-45.328		-199.94	-18.2	-217.4
3.40135	-38.8763	-51.9605		-199.94	-18.2	-217.4
24.6936	-126.073	0.111191		-199.94	-18.2	-432
0.114228	-36.5134	15.9502		-199.94	-18.2	-432
-31.3363	-37.4014	-0.209277		-199.94	-719.3	-432
-4.13834	-77.5369	-140.058		-553.03	-719.3	-432
41.75	6.31286	-38.4232		-553.03	-719.3	-191.4
-32.5868	-84.1576	4.85164		-135.13	-719.3	-191.4
31.722	-46.0299	283.285		-135.13	-719.3	-191.4
27.8175	-44.0412	4.2164		-135.13	-719.3	-204.2
-5.64648	-58.0092	-58.1536		-135.13	-85.1	-204.2
119.87	-60.3067	-28.7922		-135.13	-85.1	-204.2
-40.7472	-48.3216	-74.1553		-425.41	-85.1	-340.3
37.8022	-24.0999	-45.1783		-425.41	-85.1	-340.3
74.4149	-80.1587	82.7439		-446.68	-85.1	-340.3
-29.986	-44.4387	-45.8839		-319.06	-106.7	-283.6
41.897	19.1983	-42.4405		-75.07	-106.7	-283.6
14.4128	-67.8739	-32.3902		-75.07	-106.7	-283.6
-25.5882	-73.2479	-103.859		-75.07	-106.7	-255.2
-12.1791	-0.141859	-77.1038		-75.07	-106.7	-255.2
-58.8829	-23.1032	-72.7252		-75.07	-106.7	-255.2
36.9586	-45.0782	177.671		-19.14	-106.7	-255.2
2.29864	-44.9453	-64.7		-19.14	-106.7	-255.2
-3.00523	2.6376	-36.3517		-19.14	-106.7	-255.2
10.1299	11.4475	-12.0671		-19.14	-106.7	-360.3
181.342	-92.482	7.97904		-19.14	-106.7	-360.3
45.3911	-35.987	-28.2084		-19.14	-106.7	-360.3
4.84462	-45.1756	-4.17764		-19.14	-106.7	-360.3
31.3346	-39.9858	-141.553		-19.14	-106.7	-360.3
61.9494	-34.6617	213.527		-19.14	-106.7	-182.3
103.584	-12.4514	-23.119		-19.14	-106.7	-182.3
-13.2906	21.9167	-58.1835		-19.14	-107.5	-182.3
9.144	-29.754	-42.5255		-3.57	-107.5	-182.3
-21.2245	-47.0969	-85.4425		-3.57	-107.5	-182.3
46.3903	-25.4627	-23.7995		-3.57	-107.5	-182.3
-9.29806	8.78638	-9.22794		-3.57	-107.5	-182.3
-42.9364	-29.9889	-103.542		-3.57	-390.4	-182.3
44.6292	-96.5307	-66.2951		-3.57	-390.4	-182.3
7.02451	-23.5992	-61.6948		-3.57	-390.4	-182.3
33.7122	-2.06103	1.67857		-3.57	-390.4	-182.3
49.4226	-9.18331	-115.659		-3.57	-390.4	-182.3
-48.427	14.9181	2.15873		-3.57	-191.4	-182.3
26.471	-36.2621	-29.9624		-3.57	-191.4	-182.3
-17.5584	-28.8881	-30.6994		-3.57	-191.4	-182.3
4.13381	-19.655	328.304		-3.57	-191.4	-182.3
-2.6201	34.4834	-15.1686		-3.57	-191.4	-182.3
-44.476	1.55083	-50.9843		-3.57	-191.4	-182.3
-43.5356	-11.1977	5.76242		-3.57	-191.4	-35.5
71.7581	-55.7464	-23.2561		-3.57	-191.4	-35.5
-39.7471	-24.9496	-33.0253		-3.57	-191.4	-35.5
67.8436	-2.19876	-7.48246		-3.57	-191.4	-35.5
10.4528	-2.51654	-5.9024		-3.57	-191.4	-35.5
23.132	-52.6689	-19.5762		-3.57	-191.4	-35.5
56.0771	11.0661	33.1639		-3.57	-191.4	-35.5
15.1477	-59.8286	-65.9115		-3.57	-191.4	-35.5
32.6146	-72.3231	-27.2276		-3.57	-191.4	-35.5
30.4442	-36.2804	-38.5457		-3.57	-191.4	-35.5
39.5389	-4.28367	-27.6201		-3.57	-191.4	-282.1
17.8141	-22.9269	50.8034		-3.57	-191.4	-282.1
46.7676	4.91006	11.6898		-3.57	-191.4	-282.1
11.771	-74.4946	-26.4782		-3.57	-191.4	-282.1
6.91807	-21.2883	-60.8924		-3.57	-191.4	-282.1
15.2181	-72.6725	16.9223		-3.57	-474	-282.1
37.493	-41.6893	-42.352		-3.57	-474	-282.1
-5.78894	-36.8188	-26.6281		-3.57	-474	-282.1
29.909	0.648028	4.56691		-3.57	-474	-282.1
-3.33236	-9.09275	-11.7824		-3.57	-474	-282.1
-44.6796	-72.7656	-43.5366		-3.57	-474	-282.1
42.4153	8.63162	6.34693		-3.57	-838.7	-15.5
-7.54255	-5.04393	28.8685		-3.57	-838.7	-15.5
59.9394	-20.4854	4.5914		-3.57	-182.3	-15.5
-13.5032	-72.3885	-2.2429		-3.57	-182.3	-15.5
-16.7545	-82.2094	-10.2715		-3.57	-212.7	-15.5
-32.5766	-52.7102	0.482985		-153.15	-212.7	-15.5
6.74971	10.968	6.88428		-692.81	-159.5	-15.5
-44.9255	-26.1718	-4.26301		-692.81	-159.5	-15.5
-33.8582	-46.2509	-65.7787		-32.93	-139.2	-15.5
-9.14958	-6.21405	-68.11		-32.93	-139.2	-287.2
-27.4217	-85.071	91.7016		-32.93	-139.2	-287.2
27.1737	5.38535	-17.6515		-32.93	-107.6	-287.2
74.004	-48.8231	-3.08472		-32.93	-107.6	-287.2
-30.3358	-64.675	-83.9209		-32.93	-107.6	-287.2
22.9901	-10.4564	-22.4178		-32.93	-107.6	-191.4
76.9163	-30.8524	-53.647		-32.93	-107.6	-191.4
179.986	-56.5808	10.7803		-32.93	-107.6	-117.8
11.2485	-48.055	26.4245		-236.34	-107.6	-117.8
11.4851	84.4027	-64.0514		-236.34	-107.6	-117.8
25.5089	122.858	-58.5775		-236.34	-107.6	-117.8
27.2766	6.70961	-2.98987		-236.34	-107.6	-47.3
46.5784	-121.447	-5.76947		-236.34	-107.6	-47.3
-28.6173	-32.5324	415.148		-236.34	-107.6	-47.3
12.2703	-8.97263	-34.5077		-236.34	-107.6	-47.3
42.2944	-57.8004	-23.4164		-236.34	-107.6	-47.3
-0.343689	-57.6859	273.092		-315.3	-107.6	-47.3
28.841	-11.5683	56.1299		-315.3	-107.6	-47.3
-19.4603	-22.4178	-41.3529		-315.3	-107.6	-47.3
-45.8065	29.7659	392.62		-315.3	-107.6	-273.5
32.5056	-7.11216	-24.029		-315.3	-107.6	-273.5
89.4002	-78.4949	-53.3531		-139.22	-107.6	-273.5
-44.1813	-47.5599	-107.556		-139.22	-107.6	-273.5
-46.3155	-59.7692	-75.5467		-139.22	-107.6	-346.4
-1.95875	-10.8926	-24.573		-145.85	-107.6	-346.4
18.299	17.2614	11.8473		-145.85	-107.6	-346.4
-57.0849	-37.8656	14.7858		-1020.98	-158	-346.4
63.5188	-33.1277	11.9198		-182.32	-158	-670
7.95772	-65.0159	109.286		-182.32	-158	-670
-7.20706	-32.1687	10.1543		-182.32	-158	-670
92.1451	-57.1296	-113.207		-182.32	-158	-670
23.938	-56.413	14.6045		-15.76	-158	-670
-55.6884	-82.0252	-25.6278		-15.76	-113.4	-45.4
24.5305	-59.4514	-26.0439		-15.76	-113.4	-45.4
23.012	-32.1902	-103.96		-15.76	-113.4	-45.4
14.6306	-59.3346	24.054		-15.76	-87.2	-45.4
-14.6034	-15.9774	5.49943		-15.76	-87.2	-45.4
-47.6625	-95.5301	-17.6794		-15.76	-87.2	-45.4
406.057	-81.17	-50.0289		-15.76	-87.2	-45.4
-31.3936	-50.4964	6.86627		-15.76	-87.2	-45.4
19.6457	-20.2304	6.29841		-15.76	-87.2	-45.4
9.45448	-108.509	36.3092		-15.76	-87.2	-45.4
198.607	-49.9573	-44.5006		-15.76	-87.2	-45.4
-50.9449	-71.8593	-43.6135		-15.76	-87.2	-45.4
9.24732	-11.7441	39.8016		-15.76	-87.2	-45.4
12.7012	-87.5024	395.833		-15.76	-87.2	-159.5
-27.0137	-26.6984	-21.4431		-15.76	-87.2	-159.5
27.1996	1.06571	-108.959		-15.76	-28.6	-145.9
13.8536	-6.63555	-21.0763		-15.76	-28.6	-145.9
33.0477	-70.4827	-71.1309		-15.76	-28.6	-22.2
17.0979	-59.1272	-42.9977		-15.76	-28.6	-22.2
-38.6052	-63.2407	-53.1452		-15.76	-28.6	-22.2
14.385	-74.057	-72.1221		-15.76	-28.6	-22.2
59.1875	-57.2046	-12.7124		-15.76	-28.6	-22.2
36.8096	0.619562	-56.6721		-371.27	-28.6	-22.2
12.5417	25.9499	-40.7993		-371.27	-28.6	-22.2
43.8837	-30.0595	-32.9071		-371.27	-28.6	-133.2
8.72204	-39.6421	-52.7512		-343.6	-28.6	-133.2
-22.7676	-83.74	-49.8855		-343.6	-28.6	-133.2
-9.45999	-103.745	11.3287		-343.6	-28.6	-133.2
35.6112	-18.7081	-40.8612		-343.6	-28.6	-133.2
9.34243	-41.687	-26.9096		-343.6	-28.6	-133.2
-33.7831	-79.9385	-61.0594		-343.6	-28.6	-133.2
66.5676	-74.128	11.3117		-343.6	-28.6	-152.3
4.6453	-110.637	68.5114		-510.49	-28.6	-152.3
-32.5409	-65.6702	297.041		-510.49	-28.6	-152.3
90.1437	-46.9553	-64.2933		-178.67	-28.6	-152.3
4.30583	54.8752	237.78		-178.67	-28.6	-152.3
18.2536	-25.002	-17.4077		-178.67	-28.6	-152.3
12.9436	-59.7625	-65.9465		-102.1	-28.6	-152.3
-118.428	-84.9215	-50.5046		-102.1	-28.6	-152.3
-8.77432	10.8588	-67.4411		-102.1	-28.6	-152.3
21.323	24.6005	-56.5329		-102.1	-28.6	-152.3
68.6058	-5.6421	-4.113		-102.1	-28.6	-152.3
-29.7814	-57.3038	-61.4089		-102.1	-28.6	-152.3
-23.9724	-6.73267	-62.7306		-102.1	-28.6	-152.3
74.3884	-119.507	6.47701		-102.1	-28.6	-152.3
-74.0372	39.6156	-17.1731		-102.1	-28.6	-152.3
4.39167	51.5868	-70.3209		-85.08	-28.6	-152.3
7.66651	103.91	-29.0269		-85.08	-28.6	-274.9
-26.5788	27.7444	-15.978		-85.08	-28.6	-274.9
-6.20322	-77.8359	-90.8779		-85.08	-28.6	-274.9
-16.6225	-126.571	-35.5676		-85.08	-28.6	-274.9
20.3984	30.9365	-9.85878		-85.08	-28.6	-176.7
1.69851	-33.141	1.89709		-85.08	-28.6	-176.7
-8.48278	60.9573	-55.0539		-85.08	-28.6	-176.7
42.2042	-124.774	-52.6412		-85.08	-28.6	-176.7
40.0388	68.4535	23.1756		-29.55	-28.6	-176.7
-1.72924	-37.9404	-30.2102		-29.55	-28.6	-176.7
39.5848	36.5193	-79.2108		-29.55	-28.6	-176.7
-32.6062	15.418	-80.7332		-29.55	-28.6	-132.3
28.7835	36.062	5.81336		-29.55	-28.6	-132.3
28.5317	-11.2414	-43.9973		-29.55	-28.6	-132.3
-38.1218	37.534	-95.7508		-29.55	-28.6	-132.3
-36.8657	-64.8325	11.9595		-29.55	-28.6	-132.3
-10.9853	-53.9647	-1.59021		-29.55	-28.6	-132.3
16.1364	-2.17719	-50.276		-29.55	-28.6	-132.3
-56.2855	-25.4183	-38.6414		-29.55	-28.6	-132.3
39.0567	-71.8661	-10.1951		-29.55	-28.6	-6.8
1.19571	61.5224	2.16437		-29.55	-28.6	-6.8
61.6905	-16.5121	-61.1074		-29.55	-28.6	-6.8
23.01	144.266	59.0774		-29.55	-28.6	-6.8
-22.8663	-48.0273	11.0514		-29.55	-28.6	-6.8
-0.979608	-27.1894	-42.0139		-29.55	-246.7	-6.8
319.246	3.47841	-47.893		-29.55	-246.7	-6.8
14.7656	35.7971	22.4947		-29.55	-246.7	-6.8
-6.1472	-17.0689	-34.5107		-29.55	-246.7	-6.8
31.3197	-30.4837	-23.2138		-29.55	-246.7	-6.8
26.8554	-14.8212	-28.7526		-29.55	-246.7	-6.8
32.4005	-19.8437	-12.6495		-29.55	-246.7	-6.8
-31.6951	-62.5608	-7.86945		-29.55	-246.7	-6.8
-40.5071	17.4813	-60.0814		-29.55	-246.7	-6.8
19.8424	140.055	16.2056		-29.55	-376.8	-6.8
-33.3264	-86.805	-109.724		-29.55	-376.8	-6.8
9.78865	-28.7602	-9.20806		-170.16	-376.8	-6.8
37.0098	-54.8272	-76.9932		-170.16	-376.8	-6.8
-29.7968	-4.5477	-39.6484		-170.16	-376.8	-6.8
85.3064	-90.1967	13.7354		-95.72	-376.8	-6.8
15.3882	46.1155	-40.0425		-95.72	-189.4	-6.8
-8.92108	-116.398	-94.6629		-95.72	-189.4	-18.7
-11.3447	-12.2987	3.13791		-95.72	-189.4	-18.7
38.7471	-55.0104	-18.9988		-95.72	-189.4	-18.7
-19.9172	2.58423	126.481		-95.72	-189.4	-18.7
60.9246	-56.4143	32.0069		-95.72	-189.4	-18.7
39.4022	-4.31089	-22.0982		-95.72	-189.4	-18.7
1.19914	-51.8109	-19.6157		-95.72	-189.4	-18.7
5.49349	-32.22	30.7493		-95.72	-189.4	-18.7
-2.36407	-15.8708	-15.782		-95.72	-139.2	-18.7
-16.6421	-40.402	-85.8445		-95.72	-139.2	-18.7
56.386	20.5511	4.46217		-95.72	-139.2	-18.7
26.3919	-50.3919	18.0711		-95.72	-340.3	-18.7
-35.1825	-57.8773	-53.695		-27.35	-340.3	-18.7
34.6386	-76.1872	-8.30263		-27.35	-34.8	-18.7
17.2148	-88.689	-50.7868		-27.35	-34.8	-18.7
-20.8779	-49.8902	-64.6426		-27.35	-34.8	-18.7
-9.90089	190.368	-51.857		-27.35	-34.8	-18.7
52.4251	-49.6528	-36.9025		-27.35	-34.8	-18.7
38.9497	-26.5478	-45.2847		-27.35	-34.8	-18.7
-38.9906	-41.1903	-62.0627		-27.35	-191.4	-18.7
-22.0184	-30.6601	-38.5254		-27.35	-191.4	-18.7
22.5368	-24.391	10.2302		-27.35	-191.4	-18.7
-62.7824	21.6423	13.2581		-27.35	-63.8	-18.7
45.8511	-106.719	-114.342		-27.35	-63.8	-6.9
44.6076	-72.8909	-27.1512		-27.35	-63.8	-6.9
25.9381	4.70363	2.67111		-27.35	-402.7	-6.9
27.9915	-47.6423	-67.2115		-27.35	-402.7	-6.9
18.7304	-127.132	-53.1838		-27.35	-402.7	-6.9
-37.5992	67.9096	-57.2722		-141.8	-402.7	-6.9
49.1518	-106.286	-14.4118		-141.8	-402.7	-6.9
20.4921	-40.6843	11.4824		-141.8	-402.7	-6.9
55.6006	-35.7304	37.7094		-170.16	-402.7	-6.9
63.046	-62.906	-67.6761		-638.11	-402.7	-6.9
-33.6594	-68.9203	-22.8201		-638.11	-402.7	-6.9
56.5153	-34.0715	-67.5057		-638.11	-402.7	-6.9
32.8905	-33.8718	-97.1021		-638.11	-402.7	-6.9
-57.0517	-29.0492	-18.9519		-638.11	-402.7	-6.9
29.6014	-23.299	-52.4497		-638.11	-402.7	-6.9
-1.28357	-112.185	-31.6614		-11.78	-297.8	-6.9
-35.0011	-11.8506	-4.59561		-11.78	-297.8	-6.9
-8.46038	-4.5776	12.7027		-11.78	-297.8	-6.9
34.4559	-22.1076	-63.6839		-11.78	-95.7	-6.9
10.9382	-43.9837	-20.2904		-11.78	-95.7	-6.9
-29.8075	12.0795	-21.8792		-11.78	-518.2	-6.9
56.4098	-31.4625	-36.6031		-11.78	-518.2	-6.9
-53.5594	63.9688	-70.2058		-11.78	-518.2	-6.9
2.23577	-49.8424	-26.7786		-11.78	-518.2	-6.9
-4.76948	-20.901	-4.89443		-11.78	-518.2	-6.9
-89.4021	-82.5216	-24.7137		-11.78	-518.2	-6.9
29.3557	-22.3715	-28.5126		-11.78	-518.2	-6.9
11.4761	-47.0711	-5.26556		-11.78	-518.2	-6.9
61.1114	-110.76	-21.9983		-11.78	-518.2	-6.9
81.5178	14.5135	23.7364		-11.78	-301.7	-6.9
-78.4237	-23.2724	78.4631		-11.78	-301.7	-6.9
12.543	-76.7361	-82.1007		-11.78	-301.7	-6.9
6.88565	-51.6112	-12.1993		-11.78	-489.2	-6.9
-13.5738	-76.3712	-24.9484		-11.78	-489.2	-6.9
16.0165	-94.7533	-35.5977		-11.78	-489.2	-6.9
72.0971	24.3985	-146.276		-11.78	-56.7	-6.9
46.1763	-26.7708	-18.3833		-11.78	-56.7	-6.9
-14.7216	-82.4589	-7.1396		-11.78	-56.7	-6.9
34.3178	10.7189	-24.7264		-11.78	-255.2	-6.9
7.25237	-35.0383	-121.531		-11.78	-255.2	-6.9
35.6011	-50.3709	-50.9274		-11.78	-255.2	-6.9
16.8628	0.973615	-10.0299		-11.78	-382.9	-6.9
25.6322	-33.5861	-114.292		-11.78	-66.6	-6.9
22.9768	-23.2384	-40.2336		-11.78	-66.6	-52.4
27.5925	-9.28767	19.5294		-11.78	-66.6	-52.4
39.0389	-37.7019	-6.54995		-11.78	-66.6	-52.4
-29.5896	-2.16809	-39.0443		-11.78	-66.6	-52.4
-49.7304	-30.1107	-39.656		-11.78	-66.6	-52.4
-37.9506	-10.3972	-17.2697		-11.78	-66.6	-52.4
-36.7778	-15.9696	-25.5444		-11.78	-272.3	-52.4
-28.5348	-17.5059	-45.5304		-11.78	-272.3	-52.4
-31.7073	-45.21	-14.4875		-11.78	-272.3	-52.4
-19.3931	24.0154	-56.5061		-127.62	-272.3	-52.4
40.3553	-15.1243	-20.479		-127.62	-15.6	-52.4
-10.612	36.0032	-47.35		-127.62	-15.6	-95.7
174.917	-75.2303	-28.9654		-331.82	-15.6	-95.7
16.7274	-17.8419	67.1135		-331.82	-15.6	-95.7
47.3626	1.07103	-9.98467		-331.82	-15.6	-95.7
19.2522	-15.28	-86.2581		-510.49	-15.6	-95.7
70.3643	1.43733	148.02		-510.49	-15.6	-95.7
35.0186	149.322	0.770274		-510.49	-15.6	-95.7
60.74	-84.2969	-37.7839		-510.49	-15.6	-255.2
-64.088	17.0195	-11.6427		-510.49	-15.6	-255.2
-76.2402	23.9403	-22.2175		-510.49	-15.6	-255.2
-5.55468	-52.211	-49.6417		-6.38	-15.6	-255.2
18.6573	-38.752	95.2071		-6.38	-15.6	-4.8
1.21442	-71.352	-28.3604		-6.38	-15.6	-4.8
-8.52465	11.1908	16.1098		-6.38	-15.6	-4.8
-1.95005	-9.12998	239.144		-6.38	-15.6	-4.8
91.9862	38.2735	-81.2258		-6.38	-15.6	-4.8
40.6193	-109.162	0.939383		-6.38	-15.6	-4.8
45.7508	-40.8758	6.58365		-6.38	-15.6	-4.8
147.944	-51.5389	-42.1777		-6.38	-15.6	-4.8
224.349	-37.5078	-72.8234		-6.38	-15.6	-4.8
38.461	35.5332	-48.9781		-6.38	-15.6	-4.8
-51.6827	27.0451	-37.2861		-6.38	-15.6	-4.8
29.994	82.2867	-61.4068		-6.38	-333.8	-4.8
-52.3875	-92.0792	-80.9536		-6.38	-333.8	-4.8
-29.9193	8.98108	0.224966		-6.38	-333.8	-4.8
-0.386521	-83.6552	-34.6905		-6.38	-333.8	-4.8
-19.7291	39.5875	-23.6768		-6.38	-51	-4.8
53.32	-67.9672	172.333		-6.38	-51	-4.8
-2.33107	44.0759	-72.4765		-6.38	-51	-4.8
-10.9996	14.5408	-64.8547		-6.38	-58	-4.8
65.9366	7.16926	-15.6691		-6.38	-58	-4.8
-4.6153	-9.3403	-46.7445		-6.38	-58	-4.8
9.91698	26.8417	-23.5185		-6.38	-58	-4.8
29.8846	-131.155	-46.0673		-204.2	-58	-4.8
-18.3186	-13.0745	-28.0449		-6.9	-58	-4.8
55.8268	4.64642	-129.348		-6.9	-5.8	-4.8
12.6261	-20.3554	3.58457		-6.9	-5.8	-4.8
-31.0975	-118.797	-53.0209		-6.9	-5.8	-4.8
-22.0567	-34.3426	-10.7799		-6.9	-5.8	-4.8
-38.84	26.8702	-53.1101		-6.9	-5.8	-4.8
28.4243	-28.8951	-65.4338		-6.9	-5.8	-4.8
19.1956	-31.8537	-19.7537		-6.9	-5.8	-4.8
-54.7939	40.7386	-49.2654		-6.9	-5.8	-4.8
-62.4967	-71.5416	3.22218		-6.9	-5.8	-4.8
45.9269	-32.8523	30.4815		-6.9	-5.8	-4.8
8.08273	-36.8828	-35.9979		-6.9	-5.8	-4.8
-60.2542	-52.9002	-37.021		-6.9	-5.8	-4.8
63.2039	11.8533	-37.0747		-6.9	-5.8	-4.8
-38.3952	33.1694	-22.9271		-6.9	-5.8	-4.8
-39.7274	9.43938	48.6625		-6.9	-5.8	-4.8
90.2491	-9.10161	78.9994		-6.9	-5.8	-4.8
-19.9557	-65.2703	112.811		-6.9	-5.8	-4.8
53.3706	-6.90548	-43.421		-6.9	-5.8	-4.8
90.6657	-42.685	-12.0182		-6.9	-5.8	-4.8
5.13992	-36.9384	-53.1463		-6.9	-5.8	-4.8
-54.2292	-55.7264	-7.12477		-196.34	-5.8	-4.8
22.6035	-0.101348	-43.0073		-196.34	-5.8	-4.8
-34.5246	1.42213	222.704		-196.34	-5.8	-4.8
-81.9261	-71.7255	-15.4773		-196.34	-5.8	-4.8
-50.135	-38.7481	-37.0812		-29.17	-5.8	-4.8
48.4862	-84.5318	-12.8831		-29.17	-5.8	-4.8
-4.12767	38.6654	96.6016		-29.17	-5.8	-4.8
-36.1023	-101.63	-15.3482		-29.17	-5.8	-4.8
44.4187	43.6882	-27.7177		-29.17	-5.8	-4.8
6.28364	-44.8702	-66.2581		-29.17	-5.8	-4.8
14.2351	-103.681	-35.864		-29.17	-5.8	-4.8
-18.3452	-24.7594	3.68605		-29.17	-5.8	-4.8
50.8174	-113.783	-9.35835		-29.17	-5.8	-4.8
21.6922	-52.3448	-8.26603		-29.17	-5.8	-4.8
23.0491	-11.2563	-28.5668		-29.17	-5.8	-4.8
11.7855	2.11032	13.2729		-29.17	-5.8	-4.8
-36.8771	49.3249	14.9388		-29.17	-5.8	-4.8
65.4707	-22.9057	-63.7509		-29.17	-127.6	-81.7
-18.5312	-29.9429	-45.2689		-29.17	-127.6	-81.7
42.1249	-77.4219	-91.0987		-29.17	-127.6	-81.7
13.9248	1.9836	-63.4395		-29.17	-127.6	-81.7
36.2691	-50.1592	2.08328		-29.17	-401.1	-81.7
8.68192	-78.2312	-56.0567		-29.17	-401.1	-81.7
53.2716	3.52868	-13.9523		-29.17	-401.1	-81.7
83.5098	12.3412	-37.9251		-144.14	-401.1	-794.1
-74.3999	-122.976	8.74855		-144.14	-401.1	-794.1
32.0841	0.707596	53.2916		-144.14	-401.1	-794.1
26.5232	97.3294	-62.8224		-144.14	-401.1	-794.1
51.2209	19.509	-110.691		-144.14	-401.1	-794.1
67.9866	-94.5315	-14.6658		-144.14	-401.1	-85.1
79.9085	-29.8821	-53.1703		-144.14	-401.1	-85.1
20.2278	-7.28456	-19.9059		-144.14	-401.1	-85.1
18.1553	-4.17095	-9.76447		-144.14	-401.1	-168.1
30.9285	2.35506	34.4937		-144.14	-401.1	-168.1
29.295	13.0769	19.7493		-144.14	-401.1	-168.1
15.9255	-27.5798	-87.438		-144.14	-218.8	-168.1
46.178	-76.4254	-36.474		-144.14	-218.8	-168.1
22.4291	3.31318	-60.0508		-144.14	-218.8	-168.1
32.9461	109.184	-67.9353		-144.14	-218.8	-168.1
-23.3241	-76.7164	11.0598		-144.14	-218.8	-168.1
32.6481	-135.118	-48.7964		-144.14	-218.8	-168.1
-2.04102	-36.3865	-43.3909		-144.14	-16.2	-168.1
19.2757	-39.1975	-50.632		-144.14	-16.2	-168.1
-39.177	-139.988	241.739		-144.14	-16.2	-168.1
27.1538	-50.7147	39.2113		-144.14	-16.2	-20.7
26.486	-40.8352	-27.5793		-144.14	-16.2	-20.7
-15.1707	-5.40015	-44.8041		-144.14	-16.2	-20.7
8.13862	-53.6864	-23.8782		-144.14	-16.2	-20.7
12.731	-78.352	-60.0293		-306.29	-16.2	-20.7
10.9137	19.1292	-41.0645		-589.03	-16.2	-20.7
-19.9908	-18.1459	-18.9968		-589.03	-16.2	-20.7
2.14899	-68.128	-6.96369		-589.03	-16.2	-20.7
42.7724	-29.2743	-57.4974		-589.03	-16.2	-20.7
3.80379	-17.7301	-60.2036		-297.79	-16.2	-20.7
62.7288	-47.8606	37.8462		-297.79	-16.2	-20.7
26.1716	-18.8202	5.7025		-297.79	-16.2	-170.2
23.5599	-84.2984	-1.32827		-185.63	-16.2	-170.2
11.8013	-40.0371	-40.3466		-185.63	-16.2	-297.8
-8.10339	-43.4103	-79.755		-185.63	-16.2	-297.8
30.3546	5.80343	-92.8491		-4.82	-16.2	-102.1
217.509	-17.4752	12.9087		-4.82	-16.2	-561.5
-9.94608	6.48194	-14.376		-4.82	-16.2	-340.3
-13.9975	-46.3598	-7.2779		-4.82	-16.2	-340.3
73.4678	15.0631	-59.0154		-4.82	-16.2	-340.3
-49.9822	30.9227	-7.16257		-4.82	-148.9	-340.3
-95.2969	-37.4301	-89.1889		-4.82	-148.9	-340.3
20.1338	-41.1065	-31.0449		-4.82	-148.9	-340.3
26.8551	-21.5062	-37.7063		-4.82	-820.4	-340.3
-77.9937	-46.3654	-2.20274		-4.82	-820.4	-34.8
-11.2621	36.8828	101.123		-4.82	-820.4	-34.8
87.0833	-30.8586	-76.9143		-4.82	-820.4	-34.8
104.213	26.2999	-57.2078		-4.82	-299.6	-34.8
-19.5151	54.0609	-20.5163		-4.82	-299.6	-34.8
-41.5021	24.2757	-37.1998		-4.82	-299.6	-34.8
-4.06366	-78.5473	-42.3361		-4.82	-299.6	-198.5
-15.8375	-33.5108	-5.12817		-4.82	-299.6	-198.5
-8.88472	-47.196	-53.8208		-4.82	-299.6	-198.5
34.3387	-73.6831	167.929		-4.82	-299.6	-198.5
20.3414	29.8381	533.278		-4.82	-15.5	-198.5
50.631	-85.6461	15.6407		-4.82	-15.5	-105.6
69.847	2.60276	306.305		-4.82	-15.5	-105.6
7.7699	-39.6228	-50.1588		-4.82	-15.5	-105.6
-26.9565	-106.06	-3.78981		-4.82	-15.5	-105.6
-40.8048	-61.4219	-25.0157		-4.82	-15.5	-105.6
3.39024	-89.7297	-22.715		-4.82	-15.5	-105.6
23.3565	-7.83877	115.032		-4.82	-15.5	-105.6
20.1821	-29.8486	39.6112		-4.82	-15.5	-105.6
-12.0945	-17.5525	-42.6409		-4.82	-368.7	-105.6
12.9321	-39.6882	-48.2582		-4.82	-368.7	-105.6
22.3325	-29.3605	-53.4196		-127.62	-368.7	-105.6
17.0384	-27.2633	72.3629		-127.62	-368.7	-105.6
-29.5385	-72.4782	-4.18281		-85.08	-368.7	-105.6
-26.8924	-49.0051	-104.546		-85.08	-368.7	-105.6
8.66973	-73.4478	-35.8372		-48.62	-368.7	-105.6
-40.0035	67.2323	-51.8454		-48.62	-368.7	-105.6
42.4184	-57.4438	-26.3716		-48.62	-31.9	-105.6
40.1644	18.1494	-28.8514		-48.62	-31.9	-92.3
8.38962	-22.6148	16.3522		-48.62	-31.9	-92.3
16.39	-82.0452	-43.8233		-48.62	-31.9	-92.3
211.209	-0.552469	-52.6239		-53.18	-31.9	-92.3
43.8683	-17.8264	-25.663		-53.18	-31.9	-92.3
8.66041	-16.0643	-47.8696		-53.18	-31.9	-92.3
-14.359	17.2924	-10.8192		-53.18	-170.2	-92.3
-121.421	-56.4534	-67.4208		-53.18	-170.2	-92.3
-22.2927	-99.977	-19.0603		-53.18	-170.2	-92.3
0.051438	-23.5785	-52.2024		-53.18	-170.2	-92.3
14.393	-110.477	234.26		-85.08	-170.2	-92.3
53.9747	-77.3371	5.88352		-85.08	-647.9	-92.3
-63.507	40.7667	298.266		-85.08	-647.9	-92.3
25.8645	-144.599	-106.355		-85.08	-647.9	-85.1
-27.6873	42.2923	-14.7978		-45.04	-647.9	-85.1
100.883	-42.0338	-62.616		-45.04	-558.3	-85.1
26.479	-25.6025	-17.3779		-45.04	-558.3	-85.1
-8.23443	-137.352	-63.1227		-45.04	-558.3	-85.1
-65.1643	-50.2178	-13.264		-45.04	-558.3	-85.1
4.01337	-16.3037	13.5795		-14.5	-558.3	-85.1
-1.08513	-56.284	-27.3293		-14.5	-765.7	-85.1
423.611	-45.9738	-112.43		-14.5	-765.7	-85.1
5.02901	-22.3489	-25.6164		-14.5	-765.7	-199.2
2.5561	-33.0805	-27.3947		-14.5	-765.7	-199.2
12.8591	-7.44547	-103.653		-14.5	-765.7	-199.2
29.0661	-92.4684	-39.606		-14.5	-765.7	-199.2
17.2727	-54.833	-19.4546		-14.5	-654.1	-199.2
1.35773	-4.79158	2.88676		-14.5	-654.1	-199.2
21.6779	31.08	8.36182		-14.5	-654.1	-199.2
0.97052	-1.69147	-32.567		-14.5	-654.1	-199.2
32.0133	-91.6505	106.054		-14.5	-654.1	-199.2
-0.78282	-39.0436	101.853		-14.5	-82.2	-199.2
16.5053	-112.464	-36.4182		-14.5	-82.2	-199.2
40.4645	-60.0642	-63.0312		-14.5	-82.2	-199.2
49.633	-79.1508	1.90673		-14.5	-82.2	-652.3
-53.0143	-42.1398	41.8166		-14.5	-82.2	-652.3
37.867	-65.1332	-66.0243		-14.5	-82.2	-652.3
-110.384	-35.3617	41.3482		-14.5	-82.2	-140.8
-15.4051	56.9575	-31.5518		-14.5	-82.2	-140.8
3.86606	-86.4389	-102.565		-14.5	-82.2	-140.8
-8.12205	-24.793	4.38137		-14.5	-82.2	-140.8
218.192	101.36	-77.3925		-14.5	-82.2	-140.8
-61.6174	-57.078	-12.2872		-14.5	-82.2	-140.8
-4.68706	-50.5289	-25.6932		-14.5	-82.2	-140.8
85.3203	-29.8985	-88.8472		-7.85	-82.2	-140.8
41.2552	-64.4191	-1.07553		-7.85	-82.2	-140.8
45.0922	-12.863	-7.50658		-7.85	-82.2	-140.8
113.542	-61.227	-16.3543		-7.85	-82.2	-140.8
9.11169	4.3709	-1.34492		-7.85	-714.7	-140.8
-13.2	14.6079	11.9577		-7.85	-42.5	-140.8
2.65701	-39.9902	-102.966		-7.85	-42.5	-140.8
5.27552	-16.0211	-36.6522		-7.85	-42.5	-140.8
3.66373	-76.0461	-40.1651		-7.85	-42.5	-140.8
-62.4702	268.524	-42.4456		-7.85	-42.5	-140.8
-13.6065	-20.7929	-46.6948		-7.85	-875.1	-29.3
33.5369	-103.807	-78.0217		-7.85	-875.1	-29.3
1.1857	-44.1857	-8.27623		-7.85	-437.6	-29.3
188.704	-69.2642	-4.99752		-7.85	-437.6	-29.3
340.854	-75.7427	88.0974		-7.85	-177.3	-29.3
26.2794	50.064	56.3353		-7.85	-177.3	-29.3
43.944	-50.591	-4.29635		-7.85	-177.3	-29.3
-34.7775	-38.7299	-46.2683		-7.85	-177.3	-29.3
-54.7752	-44.5448	-28.1793		-7.85	-177.3	-29.3
-13.9147	-88.5732	-28.7486		-984.52	-177.3	-29.3
18.3197	-17.7869	-56.9314		-984.52	-177.3	-29.3
-43.6394	-10.7693	-51.8694		-425.41	-177.3	-29.3
-6.36706	25.4216	9.47733		-425.41	-177.3	-29.3
68.7827	-30.3882	-21.5227		-484.97	-177.3	-29.3
-67.824	-81.7482	-63.7624		-484.97	-113.4	-29.3
18.3283	-111.297	471.731		-484.97	-113.4	-29.3
26.083	-82.6623	-3.96107		-484.97	-113.4	-29.3
31.9874	-42.0732	-118.884		-484.97	-113.4	-10.9
7.2846	-20.1015	-41.6141		-484.97	-113.4	-10.9
2.53277	-8.60997	0.687758		19.63	-113.4	-10.9
19.6411	-55.6419	11.5481		19.63	-113.4	-10.9
-29.7774	-1.51166	-18.5354		19.63	-113.4	-10.9
79.6259	-43.2623	-46.0965		19.63	-91.9	-10.9
-84.981	2.70417	-54.3477		19.63	-91.9	-10.9
92.4297	-42.8677	-3.19056		19.63	-91.9	-10.9
28.2902	-59.2123	-77.7362		19.63	-91.9	-10.9
-34.0141	-55.8707	-39.9319		435.42	-91.9	-10.9
-34.8361	-2.72012	-44.256		435.42	-91.9	-10.9
73.4508	-43.3153	-7.49975		435.42	-91.9	-10.9
-14.9519	57.8315	-37.8416		435.42	-85.1	-10.9
49.429	-45.2482	-68.3588		435.42	-85.1	-102.1
-49.428	-62.1402	-21.5734		530.12	-85.1	-102.1
24.6265	-8.95168	-80.5763		530.12	-85.1	-102.1
9.09045	-25.9401	-33.7273		530.12	-85.1	-15.3
-14.6224	-25.4053	6.78458		530.12	-85.1	-15.3
-13.7058	-37.3617	26.0831		204.2	-918.9	-15.3
25.0718	-84.1773	507.818		467.95	-15	-15.3
11.0543	-46.526	-85.543		467.95	-15	-15.3
-24.5966	30.1173	8.44434		331.82	-15	-15.3
-10.512	-35.852	-2.29304		331.82	-15	-15.3
62.6229	-3.52739	25.2451		331.82	-15	-15.3
42.573	-17.4382	-54.3807		24.9	-15	-15.3
38.4895	-10.0198	446.134		24.9	-15	-15.3
-43.7975	-30.0354	-56.952		24.9	-15	-15.3
86.1678	-6.33479	19.4183		24.9	-15	-15.3
-7.15842	-90.019	-42.1924		24.9	-15	-15.3
18.378	-30.9037	-32.1083		24.9	-15	-15.3
32.4665	-3.71828	-25.7382		24.9	-15	-15.3
-102.88	-48.8552	-83.8407		24.9	-15	-15.3
-10.815	-67.9049	-5.33906		24.9	-15	-15.3
18.3025	9.74916	-50.4335		24.9	-15	-15.3
7.68277	-50.782	-86.2783		24.9	-15	-15.3
-24.1942	-32.2219	-76.8106		24.9	-15	-15.3
34.831	-11.9855	-5.64011		198.52	-15	-15.3
48.3777	-73.6095	-78.0368		198.52	-15	-15.3
24.2106	-18.0046	-48.6992		198.52	-15	-15.3
-48.4569	-24.6946	-28.5237		382.87	-15	-15.3
25.7227	-24.7604	-20.886		107.04	-15	-15.3
32.2336	53.0494	-82.4433		107.04	-15	-15.3
-7.78431	-82.0336	7.76368		107.04	-15	-15.3
-95.9257	-12.7612	-37.3127		107.04	-15	-15.3
13.6389	15.1765	4.64257		107.04	-15	-15.3
-107.486	-65.9219	-21.6631		107.04	-15	-15.3
9.32724	-1.42068	-13.5764		107.04	-15	-15.3
-12.7356	27.0866	-6.36987		107.04	-15	-15.3
-3.03897	167.978	-60.0633		107.04	-22.1	-15.3
22.4682	-97.6924	-58.2633		510.49	-22.1	-78
-54.3736	17.1511	-74.0965		510.49	-22.1	-78
-55.1127	6.98862	-26.1267		663.64	-22.1	-78
-36.0935	-134.845	-55.6733		425.41	-22.1	-78
34.1594	-104.787	-47.0076		425.41	-22.1	-78
18.1975	-1.08894	-21.7566		319.06	-22.1	-78
8.11846	14.2651	-49.6568		319.06	-22.1	-78
-6.60271	-100.978	11.6419		117.81	-22.1	-78
62.0527	16.7261	73.1897		117.81	-22.1	-78
-51.952	20.6623	16.5551		117.81	-22.1	-78
89.642	-14.6312	-9.82755		117.81	-22.1	-23.2
-114.219	-6.45083	57.9693		494.54	-22.1	-23.2
-16.3907	13.1311	-20.4125		494.54	-22.1	-23.2
74.7807	-62.9955	16.0102		494.54	-22.1	-23.2
7.372	-50.947	-78.9925		494.54	-22.1	-23.2
9.68468	33.9953	-3.30097		494.54	-22.1	-23.2
35.0333	-33.139	6.43364		51.05	-22.1	-23.2
-20.5397	-44.6107	-34.8373		51.05	-22.1	-23.2
42.0388	-17.9074	-54.4142		51.05	-22.1	-23.2
-2.62389	69.8011	-70.9704		51.05	-22.1	-23.2
29.47	-23.7225	-6.9434		51.05	-22.1	-23.2
25.8958	-34.7092	-8.12691		51.05	-22.1	-23.2
14.7938	-111.165	-35.1141		51.05	-22.1	-23.2
-32.6437	-33.1716	42.4373		51.05	-22.1	-23.2
18.2859	-31.5808	166.697		51.05	-22.1	-23.2
-60.7429	-34.8156	235.077		255.24	-22.1	-23.2
37.2154	-7.62558	6.90031		53.74	-22.1	-287.2
15.1005	-25.6162	-55.6306		53.74	-22.1	-287.2
-51.1654	-43.0089	-66.2159		53.74	-22.1	-287.2
45.8937	32.3522	-8.19769		53.74	-22.1	-287.2
-60.0661	13.727	-50.1557		53.74	-22.1	-287.2
-79.2223	5.05418	77.0205		116.02	-22.1	-223.3
99.1252	-14.3711	1.20272		116.02	-22.1	-223.3
66.9022	-104.986	-6.35768		116.02	-22.1	-223.3
-14.3037	16.4516	-69.7838		26.87	-22.1	-223.3
32.8411	3.47478	-40.2125		26.87	-22.1	-223.3
49.5421	-53.5795	-37.3428		26.87	-22.1	-223.3
-8.70324	-37.7778	-24.0429		26.87	-22.1	-223.3
62.4254	-70.3532	-40.5134		26.87	-22.1	-223.3
57.0731	-18.1679	-19.8847		26.87	-22.1	-223.3
60.6867	31.4668	-30.553		26.87	-22.1	-223.3
-64.2188	-47.1016	38.7474		26.87	-22.1	-223.3
46.8502	7.20699	331.763		26.87	-22.1	-223.3
42.1965	41.503	-81.5914		26.87	-22.1	-223.3
41.6234	-41.5611	-17.7848		26.87	-22.1	-223.3
48.7807	-1.92117	-102.882		553.03	-96.8	-461.2
19.0004	-28.7751	-30.3411		553.03	-96.8	-461.2
57.3652	-61.4433	3.55343		531.76	-96.8	-461.2
-18.7681	-63.9325	-55.0451		531.76	-96.8	-461.2
3.62053	-57.9134	-47.8401		531.76	-96.8	-461.2
-19.2605	-16.2553	305.824		583.42	-96.8	-461.2
7.49308	30.0894	-14.4227		583.42	-96.8	-461.2
14.3426	-52.8622	-34.2033		8.8	-96.8	-461.2
118.501	2.3008	-21.5269		8.8	-297.8	-461.2
22.0899	11.1418	-19.003		8.8	-297.8	-461.2
18.7115	150.277	75.0794		8.8	-297.8	-461.2
-17.2603	-63.3845	-37.5392		8.8	-510.5	-461.2
-75.522	-47.0182	-26.4172		8.8	-978.4	-461.2
55.3194	-36.5406	-49.6988		8.8	-978.4	-461.2
75.9737	-65.9081	434.04		8.8	-401.1	-461.2
-22.1316	-25.3952	-22.8966		8.8	-401.1	-461.2
61.0144	-105.615	7.97218		8.8	-191.4	-485
-24.4433	-85.644	-46.7175		8.8	-191.4	-485
39.0363	-27.1356	-24.4207		8.8	-429.9	-485
57.3828	237.599	6.0349		8.8	-429.9	-485
57.8474	-14.8724	-33.4958		8.8	-429.9	-485
-6.58499	-8.00352	-1.65445		8.8	-429.9	-485
-34.2803	44.532	-59.7412		8.8	-429.9	-485
-10.513	-53.2433	-16.5804		8.8	-145.9	-485
-1.49403	-71.0228	-80.8465		159.53	-145.9	-485
14.3285	-29.8936	-19.4683		159.53	-437.6	-257.7
-42.9955	-70.8435	-34.452		408.39	-437.6	-257.7
-16.613	78.2463	-21.924		601.65	-319.1	-257.7
52.8732	57.0593	-46.6299		601.65	-319.1	-257.7
18.7879	0.825365	43.7051		601.65	-319.1	-257.7
-42.8804	-120.265	10.3749		601.65	-255.2	-257.7
-9.29409	-33.1393	-56.5375		510.49	-255.2	-257.7
41.7575	22.8505	-35.1702		510.49	-255.2	-257.7
40.885	0.241449	-14.1903		510.49	-255.2	-257.7
-42.5132	-93.2666	-13.4354		413.25	-255.2	-257.7
5.19402	69.956	-18.2259		413.25	-216	-257.7
41.1219	121.679	-53.9033		413.25	-216	-257.7
-23.8742	-60.8694	-30.7793		413.25	-216	-257.7
6.05729	-98.8463	-28.3809		413.25	-216	-257.7
-81.7756	43.1907	-27.6502		413.25	-638.1	-257.7
33.5562	27.8725	-76.0841		5.94	-467.9	-257.7
[truncated: 50,204 more rows]
