# Supplementary material for: Kinesin-1, -2, and -3 motors use family-specific mechanochemical strategies to effectively compete with dynein during bidirectional transport
Source: eLife journal article supplement (doi:10.7554/elife.82228), 2022-09-20
Supplement: supp [file elife_poa_e82228_Figure_1_source_data_2.xlsx]

## Sheet: Kin1 Avg
Track	Segments	Total Distance(nm)	Total Duration(s)	Average Velocity(nm/s)
1	9	6424	26.026	246.83
2	2	-876	11.154	-78.5368
3	4	2117	6.292	336.459
4	1	949	1.716	553.03
5	2	2774	6.864	404.138
1	2	-4599	20.878	-220.28
2	11	-2117	90.948	-23.277
3	12	-4526	27.742	-163.146
4	5	5767	14.872	387.776
5	3	1606	3.146	510.49
6	1	949	1.43	663.636
7	1	1022	2.86	357.343
8	1	2044	4.576	446.678
1	1	-511	15.73	-32.4857
2	1	2336	4.576	510.49
3	3	3942	8.008	492.258
4	3	1095	15.73	69.6122
5	1	1022	2.288	446.678
6	3	1168	22.594	51.6951
7	2	949	10.01	94.8052
1	3	1460	7.722	189.07
2	5	2701	27.456	98.3756
3	3	-584	12.012	-48.618
4	20	-6132	99.528	-61.6108
5	3	1314	25.74	51.049
6	4	3066	23.452	130.735
7	1	1241	2.288	542.395
8	1	876	2.288	382.867
9	2	949	3.718	255.245
1	7	-1971	25.454	-77.4338
2	4	4088	18.018	226.884
3	1	1460	2.574	567.211
1	2	2628	30.602	85.8767
2	2	-803	9.152	-87.7404
3	1	11169	20.592	542.395
4	1	3723	6.578	565.978
5	2	511	40.612	12.5825
6	1	1095	1.716	638.112
7	1	-730	28.314	-25.7823
8	7	-2409	71.214	-33.8276
9	4	7227	25.168	287.15
1	1	1460	2.574	567.211
2	1	3723	6.864	542.395
3	2	2920	7.436	392.684
4	4	3431	11.44	299.913
5	14	-8614	78.078	-110.326
6	1	803	1.716	467.949
7	1	803	1.43	561.538
8	1	438	27.17	16.1207
1	2	3796	10.582	358.722
2	1	511	2.002	255.245
3	2	2993	6.006	498.335
4	2	2044	11.726	174.313
5	2	1606	5.72	280.769
1	2	4599	19.734	233.05
2	1	6278	10.582	593.272
3	1	13724	24.596	557.977
4	1	3066	6.006	510.49
5	2	-4599	12.87	-357.343
6	3	2555	9.438	270.714
1	1	2117	3.718	569.392
2	2	-511	27.456	-18.6116
1	2	1533	16.588	92.4162
2	4	2263	11.44	197.815
3	1	2117	3.432	616.841
4	2	2409	10.296	233.974
5	2	1387	3.718	373.05
6	5	-511	19.448	-26.2752
7	1	-2774	5.72	-484.965
1	1	2190	4.576	478.584
2	2	2701	33.176	81.4143
3	2	1971	5.72	344.58
4	3	-1533	11.44	-134.003
5	3	1022	16.588	61.6108
6	2	1387	9.438	146.959
7	3	-803	9.724	-82.5792
1	1	2409	3.718	647.929
2	1	2409	4.004	601.648
3	2	1533	7.436	206.159
1	1	4672	8.58	544.522
2	3	3723	6.578	565.978
3	2	949	4.29	221.212
1	7	4599	39.754	115.686
2	4	5913	14.586	405.389
3	4	1752	29.172	60.0576
1	3	6643	13.728	483.902
2	1	2117	3.718	569.392
3	4	5986	18.876	317.122
4	1	1314	2.86	459.441
5	2	2044	10.868	188.075
1	2	2336	5.148	453.768
2	1	1095	1.43	765.734
1	2	2044	4.576	446.678
2	4	-365	51.48	-7.09013
3	2	2482	21.164	117.275
4	3	-730	38.61	-18.907
5	5	-1387	22.88	-60.6206
6	3	-1022	37.752	-27.0714
7	1	803	2.002	401.099
1	1	2774	5.434	510.49
2	1	1095	1.716	638.112
3	8	-9636	71.786	-134.232
1	2	2993	24.024	124.584
2	2	1679	6.864	244.61
3	1	1387	3.146	440.877
4	6	-1460	31.174	-46.8339
5	1	-584	12.87	-45.3768
1	2	-365	34.892	-10.4609
2	4	-1095	20.592	-53.176
3	1	949	2.002	474.026
4	1	2482	5.72	433.916
5	2	-949	12.012	-79.0043
1	1	2920	14.3	204.196
2	2	5913	15.444	382.867
3	2	-3431	17.732	-193.492
1	2	3285	8.866	370.517
2	1	3942	6.864	574.301
3	3	2190	5.72	382.867
4	1	1752	2.86	612.587
1	4	1679	24.31	69.0662
2	3	-4745	52.91	-89.6806
3	1	-803	28.028	-28.6499
1	1	1606	3.146	510.49
2	1	1533	2.288	670.017
3	1	3358	6.292	533.694
4	3	1022	13.156	77.6832
5	9	876	51.194	17.1114
6	3	-511	10.296	-49.6309
7	1	2263	6.006	376.79
1	2	584	11.726	49.8039
2	1	-438	12.584	-34.8061
3	1	657	39.754	16.5266
1	1	1606	2.574	623.932
2	2	1241	3.718	333.782
3	4	-730	37.466	-19.4843
4	2	-1022	19.448	-52.5504
1	2	1241	10.868	114.188
2	2	657	6.292	104.418
3	2	-2409	7.722	-311.966
4	1	-365	6.578	-55.488
5	5	-1387	17.446	-79.5025
6	2	292	14.586	20.0192
1	3	5183	13.156	393.965
2	2	-1241	13.728	-90.3992
3	4	3431	13.156	260.794
1	2	292	28.028	10.4182
2	1	1241	2.288	542.395
3	4	-1387	15.444	-89.8083
4	3	-292	14.3	-20.4196
1	8	3358	30.316	110.767
2	2	-1022	54.626	-18.709
3	5	-2628	59.774	-43.9656
1	3	4745	20.306	233.675
2	1	7519	12.87	584.227
3	1	-803	8.58	-93.5897
1	4	-1387	57.486	-24.1276
2	3	-219	36.322	-6.0294
3	1	803	1.43	561.538
4	3	-949	8.866	-107.038
5	1	876	1.144	765.734
6	3	-219	21.45	-10.2098
7	1	-1460	6.578	-221.952
1	1	3212	6.864	467.949
2	1	1898	3.718	510.49
3	7	-5840	56.342	-103.653
4	1	2555	4.862	525.504
5	2	730	23.452	31.1274
6	1	1314	2.574	510.49
1	1	2044	3.432	595.571
2	1	1825	4.004	455.794
3	8	-8322	50.908	-163.471
1	1	11826	22.308	530.124
1	3	1387	11.44	121.241
2	1	1022	2.288	446.678
1	1	2701	4.576	590.253
2	1	2117	4.004	528.721
3	2	730	9.438	77.3469
4	1	-1825	17.16	-106.352
5	2	-1095	12.584	-87.0153
6	1	-2482	3.146	-788.938
1	4	3066	13.156	233.05
2	3	5840	21.736	268.679
3	1	1241	3.146	394.469
1	1	5694	12.584	452.479
2	1	-1241	24.024	-51.6567
1	6	-1095	29.172	-37.536
2	1	2263	4.862	465.446
3	1	1752	5.434	322.414
4	2	2336	6.578	355.123
5	1	438	46.904	9.33822
6	1	2117	4.004	528.721
7	1	1460	1.716	850.816
8	1	3285	6.006	546.953
9	1	1241	2.574	482.129
10	2	1898	50.05	37.9221
11	3	438	30.03	14.5854
1	1	1898	3.432	553.03
2	1	1314	2.288	574.301
3	1	803	1.43	561.538
4	1	1533	2.574	595.571
5	3	1387	49.192	28.1956
1	1	2336	5.434	429.886
2	2	-511	14.3	-35.7343
3	3	-365	23.166	-15.7558
4	1	6643	11.44	580.682
5	1	1314	2.574	510.49
1	3	-4599	8.294	-554.497
2	2	1898	4.576	414.773
3	1	949	1.43	663.636
4	4	4453	16.302	273.157
5	1	949	1.43	663.636
6	1	730	1.43	510.49
1	2	7519	16.302	461.232
2	3	2628	6.864	382.867
3	2	803	4.29	187.179
4	1	3942	7.15	551.329
5	3	-803	11.154	-71.9921
1	5	-1533	99.242	-15.4471
2	1	1898	3.432	553.03
3	1	1898	3.718	510.49
4	1	1241	2.002	619.88
5	7	1095	43.186	25.3554
6	1	1241	2.288	542.395
7	1	876	2.002	437.562
8	2	949	7.436	127.622
9	1	3869	8.866	436.386
10	6	2701	63.206	42.7333
11	7	-5840	59.202	-98.6453
12	1	803	1.43	561.538
13	4	-292	13.442	-21.723
14	4	3285	25.74	127.622
1	7	-1241	70.356	-17.6389
2	4	2993	12.584	237.842
3	1	-1387	2.002	-692.807
4	1	730	1.144	638.112
5	4	-3650	25.454	-143.396
6	2	2044	4.862	420.403
1	4	-657	16.874	-38.9356
2	3	-1971	14.014	-140.645
3	2	1898	6.578	288.538
4	1	2701	3.718	726.466
5	2	1898	28.314	67.034
1	1	5037	8.58	587.063
2	5	1752	27.742	63.1533
3	2	1898	8.008	237.013
4	1	2190	4.004	546.953
5	1	-365	23.166	-15.7558
6	1	1679	2.86	587.063
7	1	438	10.868	40.3018
8	7	-4891	92.378	-52.9455
9	1	-876	8.58	-102.098
10	3	-1533	53.196	-28.818
11	4	-2409	42.328	-56.9127
1	1	1168	2.288	510.49
2	3	2774	31.174	88.9844
3	5	-657	14.3	-45.9441
4	2	1606	13.156	122.074
5	1	1460	2.288	638.112
6	5	803	90.376	8.8851
1	1	1606	3.432	467.949
2	2	2263	5.72	395.629
3	1	4088	8.294	492.886
4	1	1971	3.432	574.301
5	3	3066	7.722	397.047
6	1	-3650	5.72	-638.112
1	1	2555	4.004	638.112
2	2	657	10.01	65.6344
3	1	1898	3.146	603.306
4	1	1022	2.002	510.49
5	2	876	15.73	55.6898
6	2	3796	12.87	294.949
1	6	1825	51.194	35.6487
2	1	1460	3.146	464.081
3	1	511	8.008	63.8112
4	2	657	40.326	16.2922
1	1	1971	2.86	689.161
2	1	1898	3.718	510.49
3	1	1241	5.434	228.377
4	1	511	27.17	18.8075
1	1	-438	37.18	-11.7805
2	3	-365	15.444	-23.6338
3	5	5621	19.162	293.341
4	4	-4088	45.76	-89.3357
5	3	1825	8.008	227.897
1	10	6935	64.35	107.77
2	1	1387	2.288	606.206
3	1	511	37.18	13.7439
4	4	3723	26.312	141.494
5	3	-511	45.474	-11.2372
1	6	5548	24.024	230.936
2	1	1168	2.002	583.417
1	1	2555	4.576	558.348
2	2	4672	16.588	281.649
3	1	1241	2.288	542.395
4	3	-730	14.586	-50.048
5	3	2628	10.01	262.537
1	1	2336	4.576	510.49
2	1	657	1.144	574.301
3	1	511	1.144	446.678
4	1	438	0.858	510.49
1	1	4964	10.582	469.098
2	1	-584	20.02	-29.1708
3	1	6716	15.444	434.861
1	1	2555	6.006	425.408
2	1	2409	2.86	842.308
3	1	1168	2.288	510.49
4	1	2190	4.862	450.432
1	1	1460	2.86	510.49
2	3	11023	21.736	507.131
3	3	-3942	28.886	-136.467
4	2	-2263	4.862	-465.446
5	5	2920	14.014	208.363
6	4	-1460	22.88	-63.8112
1	1	1825	3.146	580.102
2	1	1022	1.43	714.685
3	1	730	1.144	638.112
4	2	1095	32.604	33.5848
1	1	1971	4.004	492.258
2	2	3504	8.008	437.562
3	1	2628	4.29	612.587
4	1	1606	2.574	623.932
5	1	657	12.584	52.2092
6	2	2774	9.152	303.103
1	6	-584	52.338	-11.1582
2	2	-365	18.59	-19.6342
3	3	-292	17.732	-16.4674
4	3	1679	38.324	43.8107
1	5	14235	32.032	444.399
2	2	-219	11.726	-18.6764
3	1	730	1.43	510.49
4	1	3066	5.72	536.014
5	3	803	10.868	73.8866
1	1	1533	3.432	446.678
2	2	1533	5.434	282.113
1	4	3212	23.452	136.961
2	1	1606	1.716	935.897
3	1	1533	2.288	670.017
4	1	-365	25.168	-14.5025
1	1	1825	4.004	455.794
2	2	1314	5.148	255.245
3	1	2409	6.006	401.099
1	3	7811	15.444	505.763
2	5	4161	14.014	296.917
3	3	2555	28.6	89.3357
4	1	584	2.86	204.196
5	1	2117	5.434	389.584
1	5	-5402	12.298	-439.258
2	1	803	1.716	467.949
1	2	3869	15.444	250.518
2	1	730	1.43	510.49
3	1	1971	4.004	492.258
4	5	584	33.176	17.6031
5	1	2117	4.862	435.418
6	1	2190	4.576	478.584
7	1	1095	2.002	546.953
1	1	803	1.716	467.949
2	2	2482	16.016	154.97
3	2	6278	18.018	348.429
4	1	730	1.144	638.112

## Sheet: Kin1 Seg
Track	Segment	Distance(nm)	Duration(s)	Velocity(nm/s)
1	1	146	7.436	19.6342
1	2	2117	4.862	435.418
1	3	0	1.43	0
1	4	1971	3.718	530.124
1	5	292	1.43	204.196
1	6	0	1.43	0
1	7	803	1.716	467.949
1	8	73	1.144	63.8112
1	9	949	2.86	331.818
2	1	-73	8.58	-8.50816
2	2	-803	2.574	-311.966
3	1	1460	3.146	464.081
3	2	0	0.858	0
3	3	584	1.43	408.392
3	4	73	1.144	63.8112
4	1	949	1.716	553.03
5	1	438	2.574	170.163
5	2	2336	4.004	583.417
1	1	-4526	14.872	-304.33
1	2	0	6.006	0
2	1	73	8.008	9.11588
2	2	-438	1.43	-306.294
2	3	292	11.726	24.9019
2	4	-219	1.144	-191.434
2	5	511	2.574	198.524
2	6	-73	9.152	-7.9764
2	7	-511	0.572	-893.357
2	8	-876	41.47	-21.1237
2	9	-365	0.858	-425.408
2	10	-219	11.154	-19.6342
2	11	-365	3.146	-116.02
3	1	0	2.86	0
3	2	-146	0.858	-170.163
3	3	0	4.004	0
3	4	219	0.572	382.867
3	5	0	2.574	0
3	6	-1095	5.434	-201.509
3	7	73	2.288	31.9056
3	8	-730	2.002	-364.635
3	9	-73	1.43	-51.049
3	10	-1606	1.43	-1123.08
3	11	-1168	2.574	-453.768
3	12	0	1.716	0
4	1	1168	2.002	583.417
4	2	438	2.002	218.781
4	3	3942	6.578	599.27
4	4	292	2.002	145.854
4	5	0	2.288	0
5	1	657	1.144	574.301
5	2	219	1.43	153.147
5	3	730	0.858	850.816
6	1	949	1.43	663.636
7	1	1022	2.86	357.343
8	1	2044	4.576	446.678
1	1	-511	15.73	-32.4857
2	1	2336	4.576	510.49
3	1	2409	3.718	647.929
3	2	73	1.43	51.049
3	3	1460	2.86	510.49
4	1	73	4.862	15.0144
4	2	949	8.866	107.038
4	3	0	2.288	0
5	1	1022	2.288	446.678
6	1	73	3.432	21.2704
6	2	1022	2.002	510.49
6	3	73	17.446	4.18434
7	1	0	8.294	0
7	2	949	1.43	663.636
1	1	730	1.716	425.408
1	2	0	3.718	0
1	3	730	2.288	319.056
2	1	-73	6.864	-10.6352
2	2	438	3.718	117.805
2	3	0	9.438	0
2	4	2263	4.576	494.537
2	5	0	2.86	0
3	1	438	8.58	51.049
3	2	-949	2.002	-474.026
3	3	0	1.43	0
4	1	-730	2.574	-283.605
4	2	-73	5.148	-14.1803
4	3	-1168	5.72	-204.196
4	4	-73	4.004	-18.2318
4	5	219	0.858	255.245
4	6	-511	1.716	-297.786
4	7	0	2.574	0
4	8	-365	0.858	-425.408
4	9	292	5.434	53.7357
4	10	-1241	4.862	-255.245
4	11	-657	11.44	-57.4301
4	12	365	3.146	116.02
4	13	-1022	7.15	-142.937
4	14	0	14.014	0
4	15	-438	1.144	-382.867
4	16	0	6.578	0
4	17	-511	1.43	-357.343
4	18	73	2.86	25.5245
4	19	-219	0.858	-255.245
4	20	-146	18.018	-8.10301
5	1	292	10.868	26.8679
5	2	949	1.716	553.03
5	3	73	13.442	5.43074
6	1	1825	3.432	531.76
6	2	0	1.43	0
6	3	1168	2.002	583.417
6	4	146	16.588	8.80154
7	1	1241	2.288	542.395
8	1	876	2.288	382.867
9	1	365	2.288	159.528
9	2	584	1.43	408.392
1	1	0	2.288	0
1	2	-511	3.146	-162.428
1	3	0	2.002	0
1	4	-365	1.144	-319.056
1	5	-73	1.716	-42.5408
1	6	-803	2.574	-311.966
1	7	-146	13.156	-11.0976
2	1	2409	4.004	601.648
2	2	0	2.574	0
2	3	1606	3.146	510.49
2	4	73	8.58	8.50816
3	1	1460	2.574	567.211
1	1	2482	6.006	413.253
1	2	146	24.596	5.93592
2	1	0	2.86	0
2	2	-803	6.292	-127.622
3	1	11169	20.592	542.395
4	1	3723	6.578	565.978
5	1	657	22.308	29.4513
5	2	-146	18.304	-7.9764
6	1	1095	1.716	638.112
7	1	-730	28.314	-25.7823
8	1	0	2.574	0
8	2	-584	1.144	-510.49
8	3	-730	39.468	-18.496
8	4	-365	1.716	-212.704
8	5	-219	22.594	-9.69284
8	6	-438	0.572	-765.734
8	7	-73	3.146	-23.2041
9	1	1314	3.718	353.416
9	2	365	2.288	159.528
9	3	5548	15.444	359.233
9	4	0	3.718	0
1	1	1460	2.574	567.211
2	1	3723	6.864	542.395
3	1	73	2.002	36.4635
3	2	2847	5.434	523.923
4	1	949	1.716	553.03
4	2	73	1.144	63.8112
4	3	1752	3.432	510.49
4	4	657	5.148	127.622
5	1	-1460	4.004	-364.635
5	2	0	2.002	0
5	3	-1825	4.862	-375.36
5	4	-584	4.862	-120.115
5	5	-1168	1.43	-816.783
5	6	-146	1.43	-102.098
5	7	-292	15.73	-18.5633
5	8	-1095	8.294	-132.023
5	9	-803	1.43	-561.538
5	10	0	1.144	0
5	11	-1022	2.288	-446.678
5	12	-219	8.294	-26.4046
5	13	146	1.144	127.622
5	14	-146	21.164	-6.89851
6	1	803	1.716	467.949
7	1	803	1.43	561.538
8	1	438	27.17	16.1207
1	1	73	3.432	21.2704
1	2	3723	7.15	520.699
2	1	511	2.002	255.245
3	1	1095	3.146	348.061
3	2	1825	2.86	638.112
4	1	2044	4.004	510.49
4	2	73	7.722	9.45351
5	1	1606	4.29	374.359
5	2	0	1.144	0
1	1	4526	7.436	608.661
1	2	146	12.298	11.8718
2	1	6278	10.582	593.272
3	1	13724	24.596	557.977
4	1	3066	6.006	510.49
5	1	-1387	6.292	-220.439
5	2	-3285	6.578	-499.392
6	1	1022	3.146	324.857
6	2	365	2.86	127.622
6	3	1241	3.432	361.597
1	1	2117	3.718	569.392
2	1	-511	2.574	-198.524
2	2	-73	24.882	-2.93385
1	1	1460	2.86	510.49
1	2	73	14.014	5.20908
2	1	1241	2.574	482.129
2	2	73	3.718	19.6342
2	3	949	1.716	553.03
2	4	0	3.432	0
3	1	2117	3.432	616.841
4	1	292	5.148	56.7211
4	2	2190	5.434	403.018
5	1	803	2.574	311.966
5	2	584	0.858	680.653
6	1	-73	9.724	-7.5072
6	2	-365	1.43	-255.245
6	3	0	3.432	0
6	4	-146	1.716	-85.0816
6	5	0	3.146	0
7	1	-2774	5.72	-484.965
1	1	2190	4.576	478.584
2	1	2774	4.004	692.807
2	2	-73	29.172	-2.5024
3	1	292	2.574	113.442
3	2	1679	3.146	533.694
4	1	-73	7.722	-9.45351
4	2	-1533	1.144	-1340.03
4	3	0	2.288	0
5	1	-73	7.15	-10.2098
5	2	657	1.43	459.441
5	3	438	8.008	54.6953
6	1	1387	1.716	808.275
6	2	73	7.722	9.45351
7	1	-584	4.004	-145.854
7	2	0	3.432	0
7	3	-219	2.288	-95.7168
1	1	2409	3.718	647.929
2	1	2409	4.004	601.648
3	1	1533	2.288	670.017
3	2	0	5.148	0
1	1	4672	8.58	544.522
2	1	1752	2.86	612.587
2	2	0	1.144	0
2	3	2044	2.574	794.095
3	1	949	2.002	474.026
3	2	0	2.288	0
1	1	1241	4.576	271.198
1	2	1314	2.002	656.344
1	3	0	2.86	0
1	4	292	0.572	510.49
1	5	292	4.004	72.9271
1	6	1314	2.288	574.301
1	7	146	23.166	6.30234
2	1	4161	7.15	581.958
2	2	0	0.858	0
2	3	730	1.43	510.49
2	4	1022	5.148	198.524
3	1	146	21.45	6.80653
3	2	219	2.288	95.7168
3	3	-219	2.288	-95.7168
3	4	1606	2.86	561.538
1	1	5183	9.438	549.163
1	2	73	2.002	36.4635
1	3	1460	2.288	638.112
2	1	2117	3.718	569.392
3	1	1314	6.864	191.434
3	2	3431	7.722	444.315
3	3	0	1.43	0
3	4	1241	2.86	433.916
4	1	1314	2.86	459.441
5	1	73	8.008	9.11588
5	2	1971	2.86	689.161
1	1	2190	4.004	546.953
1	2	146	1.43	102.098
2	1	1095	1.43	765.734
1	1	1241	1.716	723.193
1	2	803	2.86	280.769
2	1	292	12.87	22.6884
2	2	-146	26.598	-5.48913
2	3	-511	5.148	-99.2618
2	4	0	6.578	0
3	1	2628	6.864	382.867
3	2	-146	14.3	-10.2098
4	1	438	8.294	52.8093
4	2	-1241	16.302	-76.1256
4	3	73	14.014	5.20908
5	1	0	4.29	0
5	2	-438	1.716	-255.245
5	3	0	2.288	0
5	4	-1022	5.434	-188.075
5	5	73	9.152	7.9764
6	1	-1314	30.888	-42.5408
6	2	365	2.288	159.528
6	3	-73	4.862	-15.0144
7	1	803	2.002	401.099
1	1	2774	5.434	510.49
2	1	1095	1.716	638.112
3	1	73	36.322	2.0098
3	2	-3358	6.292	-533.694
3	3	-73	2.002	-36.4635
3	4	-1241	2.288	-542.395
3	5	-1387	9.438	-146.959
3	6	73	6.292	11.602
3	7	-730	4.576	-159.528
3	8	-2993	4.576	-654.065
1	1	2555	7.15	357.343
1	2	438	16.874	25.9571
2	1	1606	4.862	330.317
2	2	0	2.002	0
3	1	1387	3.146	440.877
4	1	-146	16.874	-8.65236
4	2	-438	1.43	-306.294
4	3	0	3.718	0
4	4	-219	1.43	-153.147
4	5	0	3.718	0
4	6	-584	4.004	-145.854
5	1	-584	12.87	-45.3768
1	1	-292	3.432	-85.0816
1	2	-73	31.746	-2.2995
2	1	-365	3.718	-98.1711
2	2	-146	7.15	-20.4196
2	3	-511	3.432	-148.893
2	4	-73	6.578	-11.0976
3	1	949	2.002	474.026
4	1	2482	5.72	433.916
5	1	-219	10.582	-20.6955
5	2	-657	1.43	-459.441
1	1	2920	14.3	204.196
2	1	5913	12.298	480.81
2	2	0	3.432	0
3	1	-1387	4.576	-303.103
3	2	-1971	13.156	-149.818
1	1	73	1.716	42.5408
1	2	3212	7.15	449.231
2	1	3942	6.864	574.301
3	1	1606	3.146	510.49
3	2	0	1.716	0
3	3	584	0.858	680.653
4	1	1752	2.86	612.587
1	1	146	7.436	19.6342
1	2	365	1.716	212.704
1	3	73	4.576	15.9528
1	4	1095	10.582	103.478
2	1	-4526	8.008	-565.185
2	2	-292	4.29	-68.0653
2	3	0	40.898	0
3	1	-803	28.028	-28.6499
1	1	1606	3.146	510.49
2	1	1533	2.288	670.017
3	1	3358	6.292	533.694
4	1	0	2.002	0
4	2	730	2.574	283.605
4	3	292	8.58	34.0326
5	1	584	2.86	204.196
5	2	73	3.432	21.2704
5	3	-1022	1.43	-714.685
5	4	-219	2.288	-95.7168
5	5	219	5.72	38.2867
5	6	365	1.144	319.056
5	7	365	12.584	29.0051
5	8	365	1.716	212.704
5	9	146	20.306	7.18999
6	1	0	4.862	0
6	2	-511	0.858	-595.571
6	3	0	4.862	0
7	1	2263	6.006	376.79
1	1	511	3.718	137.439
1	2	73	8.008	9.11588
2	1	-438	12.584	-34.8061
3	1	657	39.754	16.5266
1	1	1606	2.574	623.932
2	1	0	2.002	0
2	2	1241	1.716	723.193
3	1	-219	9.152	-23.9292
3	2	73	9.724	7.5072
3	3	-511	10.582	-48.2895
3	4	-73	8.294	-8.80154
4	1	-219	14.3	-15.3147
4	2	-803	5.148	-155.983
1	1	0	8.866	0
1	2	1241	2.002	619.88
2	1	657	2.86	229.72
2	2	0	3.432	0
3	1	-584	3.718	-157.074
3	2	-1752	4.004	-437.562
4	1	-365	6.578	-55.488
5	1	-73	3.718	-19.6342
5	2	-365	2.002	-182.318
5	3	-146	6.578	-22.1952
5	4	-803	0.858	-935.897
5	5	0	4.29	0
6	1	730	6.578	110.976
6	2	-438	8.008	-54.6953
1	1	1679	3.146	533.694
1	2	0	1.144	0
1	3	3577	9.152	390.844
2	1	-365	10.868	-33.5848
2	2	-876	2.86	-306.294
3	1	0	3.718	0
3	2	2263	5.72	395.629
3	3	0	1.144	0
3	4	1168	2.574	453.768
1	1	73	21.45	3.40326
1	2	292	6.578	44.3904
2	1	1241	2.288	542.395
3	1	-511	3.432	-148.893
3	2	73	6.292	11.602
3	3	-730	2.002	-364.635
3	4	-219	3.718	-58.9026
4	1	0	4.29	0
4	2	-292	2.288	-127.622
4	3	0	7.722	0
1	1	0	5.148	0
1	2	876	3.146	278.449
1	3	73	3.146	23.2041
1	4	146	1.43	102.098
1	5	0	7.722	0
1	6	803	4.004	200.549
1	7	73	2.86	25.5245
1	8	1460	3.146	464.081
2	1	-803	26.884	-29.8691
2	2	-219	28.028	-7.81361
3	1	-146	15.444	-9.45351
3	2	-1168	13.442	-86.8918
3	3	-219	19.734	-11.0976
3	4	-803	4.576	-175.481
3	5	-365	6.578	-55.488
1	1	1387	3.146	440.877
1	2	73	11.726	6.22548
1	3	3285	5.72	574.301
2	1	7519	12.87	584.227
3	1	-803	8.58	-93.5897
1	1	-292	14.872	-19.6342
1	2	0	10.01	0
1	3	-657	12.584	-52.2092
1	4	-511	20.306	-25.165
2	1	219	22.022	9.9446
2	2	-511	4.29	-119.114
2	3	73	10.296	7.09013
3	1	803	1.43	561.538
4	1	-803	1.144	-701.923
4	2	73	6.006	12.1545
4	3	-292	1.716	-170.163
5	1	876	1.144	765.734
6	1	0	16.016	0
6	2	-292	1.144	-255.245
6	3	0	4.29	0
7	1	-1460	6.578	-221.952
1	1	3212	6.864	467.949
2	1	1898	3.718	510.49
3	1	-219	8.58	-25.5245
3	2	-365	3.146	-116.02
3	3	-803	2.002	-401.099
3	4	0	2.86	0
3	5	-2044	6.006	-340.326
3	6	-2628	4.576	-574.301
3	7	146	29.458	4.95621
4	1	2555	4.862	525.504
5	1	803	8.008	100.275
5	2	-146	15.444	-9.45351
6	1	1314	2.574	510.49
1	1	2044	3.432	595.571
2	1	1825	4.004	455.794
3	1	-803	18.018	-44.5665
3	2	-803	6.292	-127.622
3	3	-1825	5.434	-335.848
3	4	-1095	5.148	-212.704
3	5	-73	3.146	-23.2041
3	6	-3212	8.008	-401.099
3	7	0	2.574	0
3	8	-584	2.574	-226.884
1	1	11826	22.308	530.124
1	1	0	4.29	0
1	2	1387	3.146	440.877
1	3	0	3.718	0
2	1	1022	2.288	446.678
1	1	2701	4.576	590.253
2	1	2117	4.004	528.721
3	1	730	2.002	364.635
3	2	0	7.436	0
4	1	-1825	17.16	-106.352
5	1	-803	5.148	-155.983
5	2	-219	7.436	-29.4513
6	1	-2482	3.146	-788.938
1	1	584	1.716	340.326
1	2	73	3.718	19.6342
1	3	365	3.432	106.352
1	4	2117	4.576	462.631
2	1	73	8.294	8.80154
2	2	511	4.004	127.622
2	3	5256	9.724	540.518
3	1	1241	3.146	394.469
1	1	5694	12.584	452.479
2	1	-1241	24.024	-51.6567
1	1	-511	2.574	-198.524
1	2	0	2.288	0
1	3	-219	1.144	-191.434
1	4	-219	16.302	-13.4339
1	5	-219	2.86	-76.5734
1	6	73	4.576	15.9528
2	1	2263	4.862	465.446
3	1	1752	5.434	322.414
4	1	73	2.574	28.3605
4	2	2263	4.004	565.185
5	1	438	46.904	9.33822
6	1	2117	4.004	528.721
7	1	1460	1.716	850.816
8	1	3285	6.006	546.953
9	1	1241	2.574	482.129
10	1	1022	2.288	446.678
10	2	949	47.762	19.8694
11	1	0	9.438	0
11	2	584	4.004	145.854
11	3	-146	16.588	-8.80154
1	1	1898	3.432	553.03
2	1	1314	2.288	574.301
3	1	803	1.43	561.538
4	1	1533	2.574	595.571
5	1	511	29.458	17.3467
5	2	438	5.434	80.6036
5	3	438	14.3	30.6294
1	1	2336	5.434	429.886
2	1	-438	2.574	-170.163
2	2	-73	12.012	-6.07726
3	1	-146	18.018	-8.10301
3	2	-292	1.716	-170.163
3	3	0	3.432	0
4	1	6643	11.44	580.682
5	1	1314	2.574	510.49
1	1	0	2.574	0
1	2	-1022	2.002	-510.49
1	3	-3577	3.432	-1042.25
2	1	146	1.716	85.0816
2	2	1752	3.146	556.898
3	1	949	1.43	663.636
4	1	584	2.288	255.245
4	2	0	4.29	0
4	3	292	2.288	127.622
4	4	3577	7.436	481.038
5	1	949	1.43	663.636
6	1	730	1.43	510.49
1	1	73	3.146	23.2041
1	2	7519	13.156	571.526
2	1	876	1.716	510.49
2	2	292	1.716	170.163
2	3	1460	3.432	425.408
3	1	803	2.002	401.099
3	2	0	2.288	0
4	1	3942	7.15	551.329
5	1	0	5.148	0
5	2	-803	3.146	-255.245
5	3	0	2.86	0
1	1	73	3.718	19.6342
1	2	-730	12.298	-59.3592
1	3	-292	26.312	-11.0976
1	4	-292	3.432	-85.0816
1	5	-292	53.482	-5.45978
2	1	1898	3.432	553.03
3	1	1898	3.718	510.49
4	1	1241	2.002	619.88
5	1	292	17.446	16.7374
5	2	292	1.716	170.163
5	3	219	9.152	23.9292
5	4	292	1.43	204.196
5	5	0	1.716	0
5	6	584	2.86	204.196
5	7	-657	9.152	-71.7876
6	1	1241	2.288	542.395
7	1	876	2.002	437.562
8	1	949	3.432	276.515
8	2	0	4.29	0
9	1	3869	8.866	436.386
10	1	1314	2.86	459.441
10	2	0	1.43	0
10	3	1533	4.576	335.009
10	4	-146	1.43	-102.098
10	5	365	1.716	212.704
10	6	-292	51.194	-5.70379
11	1	-219	27.742	-7.89417
11	2	-3431	17.16	-199.942
11	3	73	3.146	23.2041
11	4	-949	1.716	-553.03
11	5	-657	4.862	-135.13
11	6	-730	1.716	-425.408
11	7	0	3.146	0
12	1	803	1.43	561.538
13	1	-511	1.144	-446.678
13	2	-73	7.722	-9.45351
13	3	219	2.002	109.391
13	4	0	2.574	0
14	1	584	12.298	47.4874
14	2	657	2.86	229.72
14	3	73	6.006	12.1545
14	4	2044	4.576	446.678
1	1	0	2.288	0
1	2	-365	1.144	-319.056
1	3	0	8.008	0
1	4	-365	4.862	-75.072
1	5	-219	11.44	-19.1434
1	6	-146	40.898	-3.56986
1	7	-219	1.43	-153.147
2	1	219	2.574	85.0816
2	2	1679	2.86	587.063
2	3	1022	3.718	274.879
2	4	73	3.718	19.6342
3	1	-1387	2.002	-692.807
4	1	730	1.144	638.112
5	1	-292	8.866	-32.9348
5	2	-1825	7.722	-236.338
5	3	0	4.004	0
5	4	-1533	4.862	-315.302
6	1	2044	3.432	595.571
6	2	0	1.43	0
1	1	-438	3.146	-139.224
1	2	73	8.58	8.50816
1	3	-292	2.002	-145.854
1	4	0	3.432	0
2	1	-73	8.866	-8.2337
2	2	-1168	1.144	-1020.98
2	3	-730	4.004	-182.318
3	1	1898	3.432	553.03
3	2	0	3.146	0
4	1	2701	3.718	726.466
5	1	1679	4.862	345.331
5	2	219	23.452	9.33822
1	1	5037	8.58	587.063
2	1	0	0	#DIV/0!
2	2	73	8.58	8.50816
2	3	438	1.43	306.294
2	4	438	16.302	26.8679
2	5	803	1.716	467.949
3	1	219	4.29	51.049
3	2	1679	4.004	419.331
4	1	2190	4.004	546.953
5	1	-365	23.166	-15.7558
6	1	1679	2.86	587.063
7	1	438	10.868	40.3018
8	1	146	72.358	2.01775
8	2	-1168	3.146	-371.265
8	3	438	3.146	139.224
8	4	-2555	7.436	-343.599
8	5	0	1.716	0
8	6	-1168	2.288	-510.49
8	7	-511	2.86	-178.671
9	1	-876	8.58	-102.098
10	1	-730	8.58	-85.0816
10	2	-73	17.446	-4.18434
10	3	-803	27.17	-29.5547
11	1	-584	3.432	-170.163
11	2	0	9.152	0
11	3	-1314	13.728	-95.7168
11	4	-438	16.016	-27.3477
1	1	1168	2.288	510.49
2	1	1752	3.718	471.221
2	2	73	24.596	2.96796
2	3	876	2.86	306.294
3	1	-73	3.432	-21.2704
3	2	-365	2.574	-141.803
3	3	0	1.43	0
3	4	-146	0.858	-170.163
3	5	-73	6.292	-11.602
4	1	1679	3.718	451.587
4	2	-73	9.438	-7.73469
5	1	1460	2.288	638.112
6	1	73	9.724	7.5072
6	2	511	15.73	32.4857
6	3	0	7.722	0
6	4	219	2.574	85.0816
6	5	73	54.626	1.33636
1	1	1606	3.432	467.949
2	1	2263	4.004	565.185
2	2	0	2.002	0
3	1	4088	8.294	492.886
4	1	1971	3.432	574.301
5	1	2263	4.004	565.185
5	2	146	3.146	46.4081
5	3	657	0.858	765.734
6	1	-3650	5.72	-638.112
1	1	2555	4.004	638.112
2	1	657	7.722	85.0816
2	2	0	2.288	0
3	1	1898	3.146	603.306
4	1	1022	2.002	510.49
5	1	511	2.86	178.671
5	2	365	13.156	27.744
6	1	3796	9.724	390.374
6	2	0	3.146	0
1	1	146	10.296	14.1803
1	2	803	3.146	255.245
1	3	-73	2.86	-25.5245
1	4	219	1.43	153.147
1	5	146	28.028	5.20908
1	6	657	5.72	114.86
2	1	1460	3.146	464.081
3	1	511	8.008	63.8112
4	1	0	26.026	0
4	2	657	14.3	45.9441
1	1	1971	2.86	689.161
2	1	1898	3.718	510.49
3	1	1241	5.434	228.377
4	1	511	27.17	18.8075
1	1	-438	37.18	-11.7805
2	1	73	5.72	12.7622
2	2	-438	3.432	-127.622
2	3	73	6.292	11.602
3	1	1022	1.716	595.571
3	2	0	1.716	0
3	3	1168	2.288	510.49
3	4	657	6.578	99.8784
3	5	2847	6.864	414.773
4	1	146	35.178	4.15032
4	2	-949	2.86	-331.818
4	3	0	1.43	0
4	4	-3212	6.292	-510.49
5	1	0	4.576	0
5	2	1168	1.43	816.783
5	3	657	2.002	328.172
1	1	146	8.58	17.0163
1	2	1168	10.868	107.471
1	3	-73	3.432	-21.2704
1	4	438	6.006	72.9271
1	5	0	2.288	0
1	6	1095	3.718	294.513
1	7	219	10.582	20.6955
1	8	2847	7.436	382.867
1	9	73	9.438	7.73469
1	10	1095	2.574	425.408
2	1	1387	2.288	606.206
3	1	511	37.18	13.7439
4	1	146	16.588	8.80154
4	2	1971	5.72	344.58
4	3	0	1.144	0
4	4	1606	2.86	561.538
5	1	-146	22.88	-6.38112
5	2	-292	1.43	-204.196
5	3	-146	21.164	-6.89851
1	1	1022	2.002	510.49
1	2	219	4.862	45.0432
1	3	1168	6.006	194.472
1	4	1898	5.148	368.687
1	5	219	3.718	58.9026
1	6	1022	2.288	446.678
2	1	1168	2.002	583.417
1	1	2555	4.576	558.348
2	1	4526	10.868	416.452
2	2	146	5.434	26.8679
3	1	1241	2.288	542.395
4	1	0	5.148	0
4	2	-730	3.718	-196.342
4	3	0	5.72	0
5	1	1241	4.29	289.277
5	2	146	1.716	85.0816
5	3	1241	4.004	309.94
1	1	2336	4.576	510.49
2	1	657	1.144	574.301
3	1	511	1.144	446.678
4	1	438	0.858	510.49
1	1	4964	10.582	469.098
2	1	-584	20.02	-29.1708
3	1	6716	15.444	434.861
1	1	2555	6.006	425.408
2	1	2409	2.86	842.308
3	1	1168	2.288	510.49
4	1	2190	4.862	450.432
1	1	1460	2.86	510.49
2	1	5548	9.152	606.206
2	2	292	2.86	102.098
2	3	5183	9.724	533.011
3	1	-3504	24.31	-144.138
3	2	-438	1.43	-306.294
3	3	0	2.86	0
4	1	-2190	3.718	-589.026
4	2	0	1.144	0
5	1	1022	2.288	446.678
5	2	146	3.718	39.2684
5	3	1168	4.004	291.708
5	4	0	2.002	0
5	5	657	2.288	287.15
6	1	0	10.296	0
6	2	-1022	3.432	-297.786
6	3	73	6.006	12.1545
6	4	-584	3.146	-185.633
1	1	1825	3.146	580.102
2	1	1022	1.43	714.685
3	1	730	1.144	638.112
4	1	-146	30.316	-4.81594
4	2	1168	2.288	510.49
1	1	1971	4.004	492.258
2	1	3504	6.864	510.49
2	2	0	1.144	0
3	1	2628	4.29	612.587
4	1	1606	2.574	623.932
5	1	657	12.584	52.2092
6	1	2555	4.862	525.504
6	2	292	4.29	68.0653
1	1	73	33.748	2.16309
1	2	-219	1.716	-127.622
1	3	0	2.002	0
1	4	-146	1.716	-85.0816
1	5	73	7.436	9.81711
1	6	-292	6.006	-48.618
2	1	-365	6.864	-53.176
2	2	0	11.726	0
3	1	0	3.146	0
3	2	-365	4.29	-85.0816
3	3	73	10.01	7.29271
4	1	0	23.452	0
4	2	1752	5.148	340.326
4	3	-73	9.438	-7.73469
1	1	6278	11.726	535.391
1	2	0	1.43	0
1	3	2409	4.576	526.442
1	4	219	3.432	63.8112
1	5	5329	10.582	503.591
2	1	0	7.15	0
2	2	-219	4.862	-45.0432
3	1	730	1.43	510.49
4	1	3066	5.72	536.014
5	1	73	5.72	12.7622
5	2	657	2.288	287.15
5	3	73	3.146	23.2041
1	1	1533	3.432	446.678
2	1	1533	3.432	446.678
2	2	0	2.002	0
1	1	1095	15.73	69.6122
1	2	1387	2.574	538.85
1	3	146	4.004	36.4635
1	4	584	1.144	510.49
2	1	1606	1.716	935.897
3	1	1533	2.288	670.017
4	1	-365	25.168	-14.5025
1	1	1825	4.004	455.794
2	1	0	2.574	0
2	2	1314	2.574	510.49
3	1	2409	6.006	401.099
1	1	4161	7.436	559.575
1	2	292	2.002	145.854
1	3	3358	6.006	559.108
2	1	1241	2.288	542.395
2	2	0	0.858	0
2	3	803	1.43	561.538
2	4	0	5.148	0
2	5	2044	4.004	510.49
3	1	1898	3.432	553.03
3	2	803	6.578	122.074
3	3	-146	18.59	-7.85368
4	1	584	2.86	204.196
5	1	2117	5.434	389.584
1	1	0	1.43	0
1	2	-1971	2.002	-984.515
1	3	-730	1.716	-425.408
1	4	0	1.43	0
1	5	-2774	5.72	-484.965
2	1	803	1.716	467.949
1	1	3796	8.294	457.68
1	2	73	7.15	10.2098
2	1	730	1.43	510.49
3	1	1971	4.004	492.258
4	1	-73	11.726	-6.22548
4	2	146	1.716	85.0816
4	3	0	4.004	0
4	4	438	2.288	191.434
4	5	73	13.442	5.43074
5	1	2117	4.862	435.418
6	1	2190	4.576	478.584
7	1	1095	2.002	546.953
1	1	803	1.716	467.949
2	1	146	12.012	12.1545
2	2	2409	4.004	601.648
3	1	146	7.436	19.6342
3	2	6132	10.582	579.475
4	1	730	1.144	638.112

## Sheet: Kin2 Avg
Track	Segments	Total Distance(nm)	Total Duration(s)	Average Velocity(nm/s)
1	3	2847	15.73	180.992
2	2	803	18.304	43.8702
3	4	-2847	11.44	-248.864
4	1	-9271	15.444	-600.298
5	3	-2409	25.168	-95.7168
6	4	-1606	10.296	-155.983
7	6	-1314	10.868	-120.905
8	2	1095	5.72	191.434
9	5	-2117	12.87	-164.491
10	1	1095	3.432	319.056
1	6	2336	31.174	74.9342
2	2	-1168	15.158	-77.055
3	7	-2044	22.88	-89.3357
4	3	1606	8.866	181.141
5	2	730	8.008	91.1588
6	1	1022	3.718	274.879
7	6	-1825	51.48	-35.4507
1	3	-3723	31.174	-119.426
2	3	-1825	38.038	-47.9783
3	1	-1533	2.86	-536.014
4	3	-730	29.458	-24.781
5	3	584	6.864	85.0816
6	1	730	2.86	255.245
7	1	730	2.288	319.056
8	2	730	5.434	134.339
9	1	657	2.002	328.172
1	6	-1168	45.76	-25.5245
2	1	-9052	15.444	-586.118
3	2	-1825	30.602	-59.6366
4	1	-2336	3.146	-742.53
5	5	-1971	6.864	-287.15
6	3	-584	12.012	-48.618
7	1	-1241	28.314	-43.8299
8	1	5548	22.022	251.93
9	3	730	13.442	54.3074
10	3	1314	12.298	106.847
1	4	-2044	82.082	-24.9019
2	1	-3212	16.874	-190.352
3	5	-2847	28.6	-99.5455
4	3	-1314	10.582	-124.173
5	1	1679	7.436	225.793
6	4	3212	22.88	140.385
7	4	1314	16.588	79.2139
1	2	-4088	63.778	-64.0973
2	2	-1022	16.302	-62.6917
3	5	-1825	44.044	-41.4358
4	4	2336	17.446	133.899
5	3	730	14.872	49.0855
6	4	2044	18.018	113.442
1	5	1971	86.372	22.8199
2	2	657	24.31	27.0259
3	3	584	8.58	68.0653
4	5	2482	21.164	117.275
5	1	1314	4.29	306.294
6	1	584	3.432	170.163
7	3	-876	22.308	-39.2684
8	3	-803	10.296	-77.9915
9	4	-1752	13.728	-127.622
10	1	-438	20.02	-21.8781
11	5	-1095	60.918	-17.975
12	6	-2117	16.874	-125.459
13	4	-1022	8.294	-123.222
14	3	1168	4.862	240.23
1	6	3723	36.608	101.699
2	4	-511	15.73	-32.4857
1	1	1387	4.576	303.103
2	1	876	3.432	255.245
3	1	1898	8.294	228.84
4	1	2336	10.868	214.943
5	2	1679	8.866	189.375
6	1	1168	5.72	204.196
7	3	876	4.862	180.173
8	3	1533	9.438	162.428
9	2	949	6.006	158.009
10	1	1533	4.862	315.302
11	1	803	5.434	147.773
12	2	1533	23.452	65.3676
13	7	1022	39.468	25.8944
14	8	-4818	24.882	-193.634
15	1	1241	2.002	619.88
1	3	803	16.016	50.1374
2	3	-1387	99.528	-13.9358
3	7	-4599	63.492	-72.4343
4	2	-1314	8.866	-148.207
5	2	-1387	7.722	-179.617
6	2	-803	4.862	-165.158
7	3	-730	17.446	-41.8434
8	1	1898	6.578	288.538
1	1	-5694	6.578	-865.613
2	2	-657	10.582	-62.0866
1	6	-949	20.878	-45.4545
2	1	-438	2.002	-218.781
3	2	730	17.732	41.1685
4	1	438	1.716	255.245
1	1	-10877	15.73	-691.481
2	1	1752	8.294	211.237
3	2	511	5.148	99.2618
4	5	-4818	29.458	-163.555
5	7	-1679	49.192	-34.1316
6	1	2044	10.868	188.075
7	1	730	3.432	212.704
1	5	1533	64.064	23.9292
2	3	3358	26.312	127.622
3	5	1241	16.302	76.1256
4	5	-6059	38.896	-155.774
1	3	-16279	32.89	-494.953
2	2	3431	22.88	149.956
3	2	730	13.156	55.488
4	2	-1898	11.154	-170.163
5	1	-1825	5.148	-354.507
6	5	-2044	9.724	-210.202
7	1	6570	22.88	287.15
8	1	7227	27.742	260.508
1	2	-657	10.582	-62.0866
2	4	-949	24.024	-39.5022
3	2	-511	9.724	-52.5504
4	1	1533	8.008	191.434
5	2	365	30.602	11.9273
1	2	-5256	7.15	-735.105
2	1	-2263	9.438	-239.775
3	1	-2263	4.862	-465.446
4	3	-4891	22.594	-216.473
5	2	-5694	34.892	-163.189
6	3	-6278	11.726	-535.391
7	3	-584	23.738	-24.6019
8	7	-2993	68.068	-43.9707
9	2	1168	14.872	78.5368
10	7	-3942	38.324	-102.86
11	4	1460	13.442	108.615
12	2	730	5.148	141.803
13	2	657	9.438	69.6122
14	2	657	8.866	74.1033
1	3	-584	15.73	-37.1265
2	6	-511	17.446	-29.2904
3	1	1095	6.864	159.528
4	1	-584	13.728	-42.5408
1	3	-1533	26.312	-58.2624
2	16	-4015	38.324	-104.765
3	2	-1168	6.292	-185.633
4	2	-730	8.008	-91.1588
5	2	1022	11.154	91.6263
1	1	-7592	9.438	-804.408
2	1	-1168	4.29	-272.261
3	3	-2044	14.014	-145.854
4	3	-2263	56.628	-39.9626
5	4	-2117	76.362	-27.7232
6	5	4526	28.6	158.252
7	2	584	22.308	26.1789
8	1	292	72.644	4.0196
1	1	-4526	6.292	-719.326
2	6	-2701	39.468	-68.4352
3	3	-8687	31.46	-276.128
4	1	-1679	2.002	-838.661
5	3	-730	7.15	-102.098
1	1	1314	5.434	241.811
2	1	1460	7.436	196.342
3	4	-876	17.732	-49.4022
4	7	-5037	64.636	-77.9287
5	1	438	3.146	139.224
1	7	4380	30.888	141.803
2	1	1825	8.294	220.039
3	2	-1679	67.496	-24.8755
4	1	-2117	8.58	-246.737
1	1	2263	7.15	316.503
2	1	1971	6.578	299.635
3	1	-2263	6.006	-376.79
4	7	5110	23.452	217.892
5	1	730	2.86	255.245
6	3	2409	19.448	123.869
7	2	-1752	11.44	-153.147
8	12	-8541	56.056	-152.365
1	1	1898	7.722	245.791
2	3	3431	37.752	90.8826
3	1	3431	16.302	210.465
4	1	-4891	9.438	-518.224
1	1	2920	16.016	182.318
2	2	1387	7.436	186.525
3	1	1679	7.722	217.431
4	1	1022	5.72	178.671
1	3	1387	8.008	173.202
2	1	438	1.43	306.294
3	1	511	2.002	255.245
4	1	1168	2.86	408.392
5	1	-949	3.146	-301.653
6	2	-1752	6.292	-278.449
7	1	-803	3.146	-255.245
1	3	-876	11.44	-76.5734
2	4	-2920	34.034	-85.7966
3	2	511	3.432	148.893
1	7	1095	52.052	21.0367
2	4	-6351	61.49	-103.285
3	2	-1241	12.584	-98.6173
4	3	-949	33.462	-28.3605
1	1	730	2.574	283.605
2	1	1460	6.006	243.09
3	1	-3285	4.004	-820.43
4	3	-4964	23.452	-211.666
5	2	-1095	11.726	-93.3822
1	1	-2409	3.718	-647.929
2	1	-2555	4.576	-558.348
3	1	-4599	6.006	-765.734
4	1	-2993	4.576	-654.065
5	1	1898	6.578	288.538
6	1	1095	4.29	255.245
7	1	730	3.432	212.704
8	1	-1387	16.874	-82.1975
9	4	-3796	10.296	-368.687
10	1	-1825	10.296	-177.253
11	1	-876	7.722	-113.442
12	3	-657	17.446	-37.6591
13	3	-511	21.736	-23.5094
14	1	-1314	1.43	-918.881
15	1	-438	29.172	-15.0144
1	1	-1022	46.332	-22.0582
2	2	-803	12.012	-66.8498
3	1	730	3.432	212.704
4	3	-1387	5.72	-242.483
5	1	-1679	1.716	-978.438
6	4	1606	14.872	107.988
7	10	-5840	32.032	-182.318
8	7	-3066	15.73	-194.914
9	5	-1168	32.604	-35.8238
1	4	-2847	34.034	-83.6516
2	4	-1168	20.02	-58.3417
3	2	-657	32.032	-20.5107
4	2	-876	21.736	-40.3018
5	6	2263	34.32	65.9382
1	3	-2847	15.158	-187.822
2	1	-1314	13.156	-99.8784
3	9	-1898	68.068	-27.8839
4	5	2555	60.346	42.3392
5	2	-1533	42.9	-35.7343
6	1	-2190	5.148	-425.408
7	5	-1460	32.032	-45.5794
8	3	-438	79.794	-5.48913
1	2	-511	28.886	-17.6902
2	2	-292	12.584	-23.2041
3	1	-584	5.72	-102.098
4	2	-584	15.444	-37.814
1	1	2263	8.58	263.753
2	3	1460	42.614	34.261
3	2	-876	15.73	-55.6898
1	1	-876	12.87	-68.0653
2	2	-803	8.866	-90.5707
3	4	2044	13.442	152.061
4	1	584	3.718	157.074
5	4	-1241	40.326	-30.7742
1	8	-803	36.322	-22.1078
2	1	438	1.716	255.245
3	1	-1533	2.002	-765.734
4	4	-949	15.73	-60.3306
5	1	-2044	4.29	-476.457
6	1	-803	32.318	-24.8468
7	1	-730	24.024	-30.3863
8	5	-1971	11.726	-168.088
9	4	-1606	16.874	-95.176
10	1	2482	10.868	228.377
1	2	-4380	12.584	-348.061
2	3	-584	11.154	-52.3579
3	8	-3285	18.304	-179.469
4	1	511	4.576	111.67
1	3	-730	45.474	-16.0531
2	8	-2263	20.878	-108.392
3	5	-2190	16.302	-134.339
4	2	365	4.29	85.0816
1	1	-657	18.304	-35.8938
2	1	949	6.006	158.009
3	1	1606	6.578	244.147
4	2	584	6.006	97.2361
5	3	-13797	23.452	-588.308
1	1	730	4.29	170.163
2	4	-2044	35.464	-57.6359
1	3	146	15.158	9.63188
2	7	2701	36.322	74.3626
3	1	1752	9.724	180.173
4	1	803	4.29	187.179
5	5	-3066	24.31	-126.121
6	1	365	3.718	98.1711
7	1	730	2.288	319.056
1	6	-1971	49.192	-40.0675
2	1	1095	3.432	319.056
3	1	730	3.718	196.342
4	2	730	4.004	182.318
5	5	-1095	8.58	-127.622
1	2	2920	16.016	182.318
2	3	2336	10.296	226.884
3	4	3139	18.304	171.493
4	1	1679	9.152	183.457
5	2	-6862	10.868	-631.395
6	1	-876	2.288	-382.867
7	1	-1679	19.448	-86.3328
8	1	-365	10.01	-36.4635
1	1	7154	28.886	247.663
2	3	-1606	27.456	-58.4936
3	1	-11607	16.874	-687.863
4	3	-2701	28.314	-95.3945
5	1	657	2.002	328.172
6	3	-1679	5.72	-293.531
1	2	-876	18.876	-46.4081
2	3	-7811	12.584	-620.709
3	3	219	50.336	4.35076
4	1	1095	3.432	319.056
5	1	730	2.574	283.605
1	1	-8103	13.728	-590.253
2	3	3066	15.73	194.914
3	10	-5840	43.186	-135.229
1	5	2190	62.634	34.965
2	3	-2336	16.302	-143.295
3	3	584	26.598	21.9565
4	4	-6570	24.31	-270.259
5	2	-3431	18.304	-187.445

## Sheet: Kin2 Seg
Track	Segment	Distance(nm)	Duration(s)	Velocity(nm/s)
1	1	146	2.574	56.7211
1	2	0	2.574	0
1	3	2701	10.868	248.528
2	1	730	6.578	110.976
2	2	146	11.726	12.451
3	1	0	1.716	0
3	2	-365	1.144	-319.056
3	3	-365	4.862	-75.072
3	4	-2117	3.718	-569.392
4	1	-9271	15.444	-600.298
5	1	-1533	12.584	-121.821
5	2	-219	6.006	-36.4635
5	3	-584	6.578	-88.7808
6	1	-219	4.29	-51.049
6	2	-657	1.716	-382.867
6	3	0	2.574	0
6	4	-803	1.716	-467.949
7	1	0	1.716	0
7	2	-511	0.858	-595.571
7	3	0	2.288	0
7	4	-365	0.858	-425.408
7	5	-73	3.146	-23.2041
7	6	-365	1.716	-212.704
8	1	0	2.002	0
8	2	1095	4.004	273.477
9	1	-949	3.718	-255.245
9	2	73	2.574	28.3605
9	3	-365	0.572	-638.112
9	4	0	3.432	0
9	5	-803	2.86	-280.769
10	1	1095	3.432	319.056
1	1	0	12.584	0
1	2	1095	4.004	273.477
1	3	0	8.294	0
1	4	365	1.43	255.245
1	5	0	2.574	0
1	6	803	2.288	350.962
2	1	-584	10.296	-56.7211
2	2	-584	4.862	-120.115
3	1	-365	2.002	-182.318
3	2	0	3.432	0
3	3	-1168	8.866	-131.739
3	4	0	3.146	0
3	5	-292	2.574	-113.442
3	6	0	1.43	0
3	7	-146	1.43	-102.098
4	1	657	1.716	382.867
4	2	0	1.43	0
4	3	949	5.72	165.909
5	1	73	4.576	15.9528
5	2	730	3.718	196.342
6	1	1022	3.718	274.879
7	1	-657	3.146	-208.837
7	2	0	3.432	0
7	3	-146	0.858	-170.163
7	4	-365	31.174	-11.7085
7	5	-657	2.86	-229.72
7	6	-73	10.296	-7.09013
1	1	-584	4.576	-127.622
1	2	-146	4.862	-30.0288
1	3	-3066	22.022	-139.224
2	1	-657	5.72	-114.86
2	2	-219	12.012	-18.2318
2	3	-949	20.306	-46.735
3	1	-1533	2.86	-536.014
4	1	-73	12.298	-5.93592
4	2	-292	2.288	-127.622
4	3	-438	14.872	-29.4513
5	1	73	2.574	28.3605
5	2	584	2.86	204.196
5	3	0	1.716	0
6	1	730	2.86	255.245
7	1	730	2.288	319.056
8	1	73	2.574	28.3605
8	2	730	2.86	255.245
9	1	657	2.002	328.172
1	1	0	14.872	0
1	2	-511	3.146	-162.428
1	3	-438	6.292	-69.6122
1	4	-73	6.578	-11.0976
1	5	-292	2.002	-145.854
1	6	73	13.156	5.5488
2	1	-9052	15.444	-586.118
3	1	-1460	12.584	-116.02
3	2	-365	18.018	-20.2575
4	1	-2336	3.146	-742.53
5	1	-949	1.716	-553.03
5	2	0	1.144	0
5	3	-438	1.43	-306.294
5	4	0	1.144	0
5	5	-584	1.43	-408.392
6	1	73	7.436	9.81711
6	2	-657	2.574	-255.245
6	3	0	2.002	0
7	1	-1241	28.314	-43.8299
8	1	5548	22.022	251.93
9	1	0	5.72	0
9	2	730	2.574	283.605
9	3	0	5.148	0
10	1	803	4.576	175.481
10	2	-73	3.432	-21.2704
10	3	511	4.576	111.67
1	1	73	14.586	5.0048
1	2	-292	10.01	-29.1708
1	3	0	7.15	0
1	4	-1752	50.622	-34.6095
2	1	-3212	16.874	-190.352
3	1	-803	3.432	-233.974
3	2	0	2.86	0
3	3	-365	1.144	-319.056
3	4	0	12.012	0
3	5	-1679	9.152	-183.457
4	1	-949	6.292	-150.826
4	2	-73	2.574	-28.3605
4	3	-292	1.716	-170.163
5	1	1679	7.436	225.793
6	1	0	6.864	0
6	2	1825	7.15	255.245
6	3	0	2.002	0
6	4	1460	7.15	204.196
7	1	146	7.722	18.907
7	2	438	3.146	139.224
7	3	146	2.574	56.7211
7	4	657	3.432	191.434
1	1	73	39.182	1.8631
1	2	-4088	24.596	-166.206
2	1	-803	2.574	-311.966
2	2	-219	13.728	-15.9528
3	1	1168	6.864	170.163
3	2	-146	16.874	-8.65236
3	3	-292	3.718	-78.5368
3	4	-73	4.576	-15.9528
3	5	-2482	12.298	-201.821
4	1	0	1.716	0
4	2	438	1.716	255.245
4	3	0	4.004	0
4	4	1971	10.582	186.26
5	1	73	5.148	14.1803
5	2	657	4.862	135.13
5	3	73	5.148	14.1803
6	1	1241	8.008	154.97
6	2	219	6.578	33.2928
6	3	657	1.144	574.301
6	4	0	2.574	0
1	1	73	32.604	2.23899
1	2	657	2.288	287.15
1	3	146	8.294	17.6031
1	4	1241	6.578	188.659
1	5	-73	37.18	-1.96342
2	1	438	10.582	41.391
2	2	219	13.728	15.9528
3	1	146	5.148	28.3605
3	2	365	1.43	255.245
3	3	73	2.002	36.4635
4	1	511	7.15	71.4685
4	2	1460	8.008	182.318
4	3	0	1.716	0
4	4	511	1.716	297.786
4	5	0	2.574	0
5	1	1314	4.29	306.294
6	1	584	3.432	170.163
7	1	-146	4.576	-31.9056
7	2	-365	1.43	-255.245
7	3	-438	16.302	-26.8679
8	1	-73	1.43	-51.049
8	2	-584	2.002	-291.708
8	3	-146	6.864	-21.2704
9	1	146	4.576	31.9056
9	2	-292	1.716	-170.163
9	3	0	2.86	0
9	4	-1606	4.576	-350.962
10	1	-438	20.02	-21.8781
11	1	73	45.474	1.60531
11	2	-219	0.858	-255.245
11	3	0	2.288	0
11	4	-876	5.72	-153.147
11	5	0	6.578	0
12	1	-219	0.858	-255.245
12	2	73	3.146	23.2041
12	3	-1168	2.288	-510.49
12	4	0	3.718	0
12	5	-730	3.146	-232.041
12	6	0	4.004	0
13	1	-73	3.718	-19.6342
13	2	-511	1.144	-446.678
13	3	-73	1.716	-42.5408
13	4	-438	1.716	-255.245
14	1	657	2.574	255.245
14	2	73	1.43	51.049
14	3	511	0.858	595.571
1	1	365	4.576	79.764
1	2	73	13.442	5.43074
1	3	2409	9.152	263.221
1	4	0	5.434	0
1	5	730	2.288	319.056
1	6	219	2.002	109.391
2	1	365	6.006	60.7726
2	2	-73	3.146	-23.2041
2	3	219	3.718	58.9026
2	4	-1022	3.146	-324.857
1	1	1387	4.576	303.103
2	1	876	3.432	255.245
3	1	1898	8.294	228.84
4	1	2336	10.868	214.943
5	1	1606	7.15	224.615
5	2	73	1.716	42.5408
6	1	1168	5.72	204.196
7	1	438	1.716	255.245
7	2	0	2.002	0
7	3	438	1.144	382.867
8	1	803	3.432	233.974
8	2	0	2.288	0
8	3	730	3.718	196.342
9	1	876	4.004	218.781
9	2	73	2.002	36.4635
10	1	1533	4.862	315.302
11	1	803	5.434	147.773
12	1	-73	19.162	-3.80962
12	2	1606	4.29	374.359
13	1	365	4.29	85.0816
13	2	146	12.298	11.8718
13	3	-219	2.002	-109.391
13	4	365	4.004	91.1588
13	5	73	5.434	13.4339
13	6	292	1.144	255.245
13	7	73	10.582	6.89851
14	1	-2263	7.15	-316.503
14	2	-365	4.004	-91.1588
14	3	0	2.288	0
14	4	-949	2.86	-331.818
14	5	0	2.574	0
14	6	-657	2.288	-287.15
14	7	-73	2.002	-36.4635
14	8	-511	1.716	-297.786
15	1	1241	2.002	619.88
1	1	-511	2.574	-198.524
1	2	0	8.58	0
1	3	1314	5.148	255.245
2	1	-511	81.51	-6.26917
2	2	-730	10.582	-68.9851
2	3	-146	7.436	-19.6342
3	1	365	2.86	127.622
3	2	-876	8.866	-98.8044
3	3	0	3.432	0
3	4	-438	0.858	-510.49
3	5	-219	11.154	-19.6342
3	6	-2336	19.734	-118.374
3	7	-1095	16.874	-64.8927
4	1	-730	2.002	-364.635
4	2	-584	6.864	-85.0816
5	1	0	3.146	0
5	2	-1387	4.576	-303.103
6	1	-803	2.288	-350.962
6	2	0	2.574	0
7	1	73	8.58	8.50816
7	2	-803	4.29	-187.179
7	3	0	4.29	0
8	1	1898	6.578	288.538
1	1	-5694	6.578	-865.613
2	1	-730	2.288	-319.056
2	2	73	8.58	8.50816
1	1	-292	2.288	-127.622
1	2	0	3.718	0
1	3	-146	1.716	-85.0816
1	4	-73	3.432	-21.2704
1	5	-365	2.86	-127.622
1	6	-146	6.864	-21.2704
2	1	-438	2.002	-218.781
3	1	730	3.432	212.704
3	2	73	14.3	5.1049
4	1	438	1.716	255.245
1	1	-10877	15.73	-691.481
2	1	1752	8.294	211.237
3	1	0	2.002	0
3	2	511	3.146	162.428
4	1	-1022	8.58	-119.114
4	2	-1460	2.86	-510.49
4	3	-146	7.15	-20.4196
4	4	-1022	2.288	-446.678
4	5	-1168	8.58	-136.131
5	1	-73	10.296	-7.09013
5	2	-1241	17.16	-72.3193
5	3	-73	4.004	-18.2318
5	4	-730	4.29	-170.163
5	5	-292	5.434	-53.7357
5	6	73	5.148	14.1803
5	7	657	2.86	229.72
6	1	2044	10.868	188.075
7	1	730	3.432	212.704
1	1	146	21.45	6.80653
1	2	657	14.3	45.9441
1	3	0	5.434	0
1	4	511	2.288	223.339
1	5	292	20.878	13.986
2	1	1898	10.582	179.361
2	2	146	7.15	20.4196
2	3	1314	8.58	153.147
3	1	0	2.288	0
3	2	292	1.144	255.245
3	3	0	2.002	0
3	4	876	2.86	306.294
3	5	73	8.294	8.80154
4	1	-2044	5.148	-397.047
4	2	-2190	10.868	-201.509
4	3	-730	9.152	-79.764
4	4	0	4.862	0
4	5	-1022	8.866	-115.272
1	1	-13286	25.74	-516.162
1	2	-657	2.574	-255.245
1	3	-2263	4.29	-527.506
2	1	3431	18.876	181.765
2	2	0	4.004	0
3	1	730	5.72	127.622
3	2	0	7.15	0
4	1	-1825	7.15	-255.245
4	2	-73	4.29	-17.0163
5	1	-1825	5.148	-354.507
6	1	-657	2.574	-255.245
6	2	0	2.86	0
6	3	-365	0.572	-638.112
6	4	0	1.43	0
6	5	-949	2.002	-474.026
7	1	6570	22.88	287.15
8	1	7227	27.742	260.508
1	1	-584	6.864	-85.0816
1	2	0	3.718	0
2	1	-146	7.436	-19.6342
2	2	-219	2.574	-85.0816
2	3	-146	11.44	-12.7622
2	4	-438	2.86	-153.147
3	1	-365	4.576	-79.764
3	2	-146	5.434	-26.8679
4	1	1533	8.008	191.434
5	1	292	12.584	23.2041
5	2	73	18.304	3.9882
1	1	-657	1.716	-382.867
1	2	-4672	5.72	-816.783
2	1	-2263	9.438	-239.775
3	1	-2263	4.862	-465.446
4	1	-1679	6.292	-266.847
4	2	-292	4.29	-68.0653
4	3	-2920	12.012	-243.09
5	1	-4891	20.306	-240.865
5	2	-803	14.872	-53.9941
6	1	-4526	6.578	-688.051
6	2	-73	1.43	-51.049
6	3	-1752	3.718	-471.221
7	1	-73	10.01	-7.29271
7	2	-292	3.146	-92.8163
7	3	-219	10.582	-20.6955
8	1	73	6.578	11.0976
8	2	-803	2.288	-350.962
8	3	-219	9.438	-23.2041
8	4	-365	3.146	-116.02
8	5	146	8.58	17.0163
8	6	-803	5.434	-147.773
8	7	-1022	32.89	-31.0733
9	1	0	4.004	0
9	2	1168	10.868	107.471
10	1	-438	3.146	-139.224
10	2	0	8.008	0
10	3	-438	4.29	-102.098
10	4	0	4.004	0
10	5	-1460	5.434	-268.679
10	6	-146	6.864	-21.2704
10	7	-1460	6.578	-221.952
11	1	438	2.574	170.163
11	2	73	6.292	11.602
11	3	657	2.002	328.172
11	4	292	2.86	102.098
12	1	730	3.432	212.704
12	2	0	1.716	0
13	1	657	3.718	176.708
13	2	0	5.72	0
14	1	0	4.576	0
14	2	657	4.29	153.147
1	1	73	2.288	31.9056
1	2	-657	8.008	-82.043
1	3	0	5.434	0
2	1	0	2.288	0
2	2	-730	2.86	-255.245
2	3	0	2.002	0
2	4	-365	0.858	-425.408
2	5	657	4.862	135.13
2	6	-73	4.576	-15.9528
3	1	1095	6.864	159.528
4	1	-584	13.728	-42.5408
1	1	219	9.724	22.5216
1	2	-1095	14.014	-78.1361
1	3	-657	2.86	-229.72
2	1	-730	2.002	-364.635
2	2	0	2.288	0
2	3	292	1.43	204.196
2	4	-292	4.29	-68.0653
2	5	-657	1.144	-574.301
2	6	-73	2.002	-36.4635
2	7	292	1.43	204.196
2	8	-876	4.29	-204.196
2	9	0	2.574	0
2	10	-1168	7.436	-157.074
2	11	292	1.144	255.245
2	12	0	2.574	0
2	13	-876	2.002	-437.562
2	14	219	1.716	127.622
2	15	-438	0.858	-510.49
2	16	0	1.716	0
3	1	-1168	3.718	-314.147
3	2	0	2.574	0
4	1	-730	2.288	-319.056
4	2	0	5.72	0
5	1	1022	4.862	210.202
5	2	0	6.578	0
1	1	-7592	9.438	-804.408
2	1	-1168	4.29	-272.261
3	1	-1095	4.576	-239.292
3	2	-146	7.722	-18.907
3	3	-803	1.716	-467.949
4	1	73	16.302	4.47798
4	2	-2409	25.454	-94.6413
4	3	73	14.872	4.90855
5	1	-803	22.022	-36.4635
5	2	0	8.294	0
5	3	-584	6.006	-97.2361
5	4	-730	40.04	-18.2318
6	1	2628	14.014	187.527
6	2	730	2.288	319.056
6	3	73	4.576	15.9528
6	4	730	3.432	212.704
6	5	365	4.29	85.0816
7	1	438	2.574	170.163
7	2	146	19.448	7.5072
8	1	292	72.644	4.0196
1	1	-4526	6.292	-719.326
2	1	0	5.434	0
2	2	-438	5.148	-85.0816
2	3	0	4.004	0
2	4	-1679	15.73	-106.739
2	5	0	3.718	0
2	6	-584	5.434	-107.471
3	1	-1898	4.862	-390.374
3	2	-3942	20.592	-191.434
3	3	-2847	6.006	-474.026
4	1	-1679	2.002	-838.661
5	1	-365	2.002	-182.318
5	2	0	3.432	0
5	3	-365	1.716	-212.704
1	1	1314	5.434	241.811
2	1	1460	7.436	196.342
3	1	-365	2.288	-159.528
3	2	-73	10.582	-6.89851
3	3	-438	3.146	-139.224
3	4	0	2.002	0
4	1	-2555	23.738	-107.633
4	2	-73	15.158	-4.81594
4	3	-949	6.006	-158.009
4	4	-73	3.146	-23.2041
4	5	-292	2.574	-113.442
4	6	-73	2.574	-28.3605
4	7	-1022	11.726	-87.1567
5	1	438	3.146	139.224
1	1	1241	8.294	149.626
1	2	0	2.288	0
1	3	876	4.29	204.196
1	4	0	1.716	0
1	5	803	4.576	175.481
1	6	0	3.432	0
1	7	1460	6.006	243.09
2	1	1825	8.294	220.039
3	1	-1606	56.056	-28.6499
3	2	-73	11.44	-6.38112
4	1	-2117	8.58	-246.737
1	1	2263	7.15	316.503
2	1	1971	6.578	299.635
3	1	-2263	6.006	-376.79
4	1	584	2.288	255.245
4	2	0	1.144	0
4	3	1533	4.862	315.302
4	4	0	1.144	0
4	5	803	4.29	187.179
4	6	0	0.858	0
4	7	2117	9.152	231.316
5	1	730	2.86	255.245
6	1	730	3.146	232.041
6	2	0	4.29	0
6	3	1679	12.298	136.526
7	1	-1679	8.866	-189.375
7	2	-73	2.574	-28.3605
8	1	-438	3.146	-139.224
8	2	0	2.574	0
8	3	-584	1.716	-340.326
8	4	-219	6.292	-34.8061
8	5	-657	3.432	-191.434
8	6	-219	3.432	-63.8112
8	7	-5183	12.87	-402.72
8	8	-73	3.146	-23.2041
8	9	-1022	3.432	-297.786
8	10	0	2.574	0
8	11	-219	2.288	-95.7168
8	12	-73	11.726	-6.22548
1	1	1898	7.722	245.791
2	1	0	2.002	0
2	2	3285	19.162	171.433
2	3	73	16.874	4.32618
3	1	3431	16.302	210.465
4	1	-4891	9.438	-518.224
1	1	2920	16.016	182.318
2	1	0	3.718	0
2	2	1387	4.004	346.404
3	1	1679	7.722	217.431
4	1	1022	5.72	178.671
1	1	657	3.146	208.837
1	2	0	2.002	0
1	3	657	2.574	255.245
2	1	438	1.43	306.294
3	1	511	2.002	255.245
4	1	1168	2.86	408.392
5	1	-949	3.146	-301.653
6	1	-1679	3.432	-489.219
6	2	-146	2.574	-56.7211
7	1	-803	3.146	-255.245
1	1	-438	1.144	-382.867
1	2	-438	6.578	-66.5856
1	3	0	3.718	0
2	1	-1168	4.29	-272.261
2	2	-365	23.452	-15.5637
2	3	-1241	3.718	-333.782
2	4	-146	2.86	-51.049
3	1	0	1.144	0
3	2	511	2.288	223.339
1	1	0	5.148	0
1	2	730	18.018	40.515
1	3	365	2.86	127.622
1	4	0	4.004	0
1	5	146	1.43	102.098
1	6	-365	6.292	-58.0102
1	7	219	14.3	15.3147
2	1	-219	37.466	-5.8453
2	2	-511	4.004	-127.622
2	3	73	5.72	12.7622
2	4	-5621	14.014	-401.099
3	1	-1314	6.006	-218.781
3	2	73	6.578	11.0976
4	1	-365	22.594	-16.1547
4	2	-511	3.432	-148.893
4	3	-73	7.436	-9.81711
1	1	730	2.574	283.605
2	1	1460	6.006	243.09
3	1	-3285	4.004	-820.43
4	1	-1971	6.578	-299.635
4	2	-146	9.438	-15.4694
4	3	-2847	7.722	-368.687
5	1	-219	6.864	-31.9056
5	2	-876	5.148	-170.163
1	1	-2409	3.718	-647.929
2	1	-2555	4.576	-558.348
3	1	-4599	6.006	-765.734
4	1	-2993	4.576	-654.065
5	1	1898	6.578	288.538
6	1	1095	4.29	255.245
7	1	730	3.432	212.704
8	1	-1387	16.874	-82.1975
9	1	-1022	1.43	-714.685
9	2	-219	5.148	-42.5408
9	3	-1752	2.002	-875.125
9	4	-876	2.002	-437.562
10	1	-1825	10.296	-177.253
11	1	-876	7.722	-113.442
12	1	73	6.292	11.602
12	2	-657	7.15	-91.8881
12	3	-73	4.29	-17.0163
13	1	-73	6.006	-12.1545
13	2	-511	6.006	-85.0816
13	3	73	10.01	7.29271
14	1	-1314	1.43	-918.881
15	1	-438	29.172	-15.0144
1	1	-1022	46.332	-22.0582
2	1	-803	8.294	-96.817
2	2	0	4.004	0
3	1	730	3.432	212.704
4	1	-1022	3.432	-297.786
4	2	0	1.43	0
4	3	-438	0.858	-510.49
5	1	-1679	1.716	-978.438
6	1	803	4.576	175.481
6	2	0	1.716	0
6	3	511	3.432	148.893
6	4	365	5.434	67.1697
7	1	0	3.432	0
7	2	-803	2.002	-401.099
7	3	-438	2.288	-191.434
7	4	0	2.574	0
7	5	-2336	5.434	-429.886
7	6	-292	2.002	-145.854
7	7	-876	2.002	-437.562
7	8	0	2.86	0
7	9	-1095	3.432	-319.056
7	10	0	6.578	0
8	1	-1168	4.576	-255.245
8	2	0	1.716	0
8	3	-803	3.718	-215.976
8	4	438	1.716	255.245
8	5	-730	1.144	-638.112
8	6	0	1.43	0
8	7	-803	1.716	-467.949
9	1	0	5.148	0
9	2	-584	3.432	-170.163
9	3	-146	10.582	-13.797
9	4	-438	2.574	-170.163
9	5	-73	11.154	-6.54474
1	1	0	5.148	0
1	2	-584	9.438	-61.8775
1	3	0	4.576	0
1	4	-2263	15.158	-149.294
2	1	-584	3.432	-170.163
2	2	-146	6.006	-24.309
2	3	-511	4.862	-105.101
2	4	0	5.72	0
3	1	0	16.016	0
3	2	-657	16.016	-41.0215
4	1	-657	6.006	-109.391
4	2	-219	15.73	-13.9224
5	1	365	12.298	29.6796
5	2	-438	5.434	-80.6036
5	3	292	8.008	36.4635
5	4	1460	6.292	232.041
5	5	73	1.43	51.049
5	6	511	1.43	357.343
1	1	-2117	9.438	-224.306
1	2	-73	2.288	-31.9056
1	3	-730	3.718	-196.342
2	1	-1314	13.156	-99.8784
3	1	-146	5.434	-26.8679
3	2	-584	4.29	-136.131
3	3	-438	9.438	-46.4081
3	4	-876	3.432	-255.245
3	5	-1314	14.014	-93.7634
3	6	0	6.006	0
3	7	1314	10.01	131.269
3	8	-73	12.298	-5.93592
3	9	219	3.432	63.8112
4	1	365	39.468	9.248
4	2	657	2.86	229.72
4	3	73	4.862	15.0144
4	4	584	2.86	204.196
4	5	949	10.296	92.1717
5	1	-730	29.744	-24.5428
5	2	-803	12.87	-62.3932
6	1	-2190	5.148	-425.408
7	1	0	1.43	0
7	2	-657	3.146	-208.837
7	3	73	7.436	9.81711
7	4	-876	16.874	-51.9142
7	5	0	3.432	0
8	1	73	36.322	2.0098
8	2	-438	12.012	-36.4635
8	3	-73	31.46	-2.32041
1	1	-73	22.022	-3.31487
1	2	-438	7.15	-61.2587
2	1	-365	6.006	-60.7726
2	2	73	6.578	11.0976
3	1	-584	5.72	-102.098
4	1	-292	12.87	-22.6884
4	2	-365	2.86	-127.622
1	1	2263	8.58	263.753
2	1	146	20.306	7.18999
2	2	1168	16.016	72.9271
2	3	146	6.292	23.2041
3	1	-511	4.29	-119.114
3	2	-438	11.726	-37.3529
1	1	-876	12.87	-68.0653
2	1	-219	5.72	-38.2867
2	2	-584	3.146	-185.633
3	1	146	3.718	39.2684
3	2	1241	4.004	309.94
3	3	73	4.004	18.2318
3	4	730	2.002	364.635
4	1	584	3.718	157.074
5	1	-584	14.3	-40.8392
5	2	-73	13.156	-5.5488
5	3	-657	7.436	-88.354
5	4	0	5.72	0
1	1	146	1.716	85.0816
1	2	0	4.576	0
1	3	511	9.724	52.5504
1	4	-73	6.006	-12.1545
1	5	-803	5.72	-140.385
1	6	0	2.574	0
1	7	-584	2.288	-255.245
1	8	0	4.004	0
2	1	438	1.716	255.245
3	1	-1533	2.002	-765.734
4	1	-73	3.146	-23.2041
4	2	-438	4.004	-109.391
4	3	0	3.718	0
4	4	-438	5.148	-85.0816
5	1	-2044	4.29	-476.457
6	1	-803	32.318	-24.8468
7	1	-730	24.024	-30.3863
8	1	-511	2.288	-223.339
8	2	73	2.002	36.4635
8	3	-657	2.288	-287.15
8	4	0	3.146	0
8	5	-876	2.288	-382.867
9	1	-657	4.862	-135.13
9	2	0	2.002	0
9	3	-949	4.004	-237.013
9	4	0	6.006	0
10	1	2482	10.868	228.377
1	1	-2190	8.58	-255.245
1	2	-2117	4.29	-493.473
2	1	-876	6.864	-127.622
2	2	0	2.574	0
2	3	219	1.43	153.147
3	1	-1533	4.004	-382.867
3	2	-438	3.718	-117.805
3	3	-511	1.144	-446.678
3	4	-146	3.432	-42.5408
3	5	-365	0.858	-425.408
3	6	219	1.43	153.147
3	7	-803	1.43	-561.538
3	8	365	2.002	182.318
4	1	511	4.576	111.67
1	1	73	3.432	21.2704
1	2	-219	1.43	-153.147
1	3	-511	40.898	-12.4945
2	1	-292	2.002	-145.854
2	2	-73	2.86	-25.5245
2	3	-438	2.002	-218.781
2	4	-219	4.576	-47.8584
2	5	-438	1.43	-306.294
2	6	-73	2.002	-36.4635
2	7	-657	2.86	-229.72
2	8	-146	3.718	-39.2684
3	1	-1533	3.146	-487.285
3	2	0	2.86	0
3	3	-365	2.002	-182.318
3	4	0	6.578	0
3	5	-292	1.716	-170.163
4	1	365	2.002	182.318
4	2	0	2.288	0
1	1	-657	18.304	-35.8938
2	1	949	6.006	158.009
3	1	1606	6.578	244.147
4	1	584	3.432	170.163
4	2	0	2.574	0
5	1	-11534	18.304	-630.135
5	2	0	1.716	0
5	3	-2263	3.432	-659.382
1	1	730	4.29	170.163
2	1	73	23.452	3.11274
2	2	-803	1.716	-467.949
2	3	-73	8.58	-8.50816
2	4	-1241	2.002	-619.88
1	1	0	5.148	0
1	2	-438	4.862	-90.0864
1	3	584	5.148	113.442
2	1	0	2.002	0
2	2	511	1.716	297.786
2	3	876	9.152	95.7168
2	4	0	5.72	0
2	5	876	5.148	170.163
2	6	219	8.58	25.5245
2	7	365	4.004	91.1588
3	1	1752	9.724	180.173
4	1	803	4.29	187.179
5	1	-1460	4.576	-319.056
5	2	219	11.154	19.6342
5	3	-803	2.574	-311.966
5	4	0	4.862	0
5	5	-1095	1.43	-765.734
6	1	365	3.718	98.1711
7	1	730	2.288	319.056
1	1	-730	12.012	-60.7726
1	2	73	7.15	10.2098
1	3	-876	4.862	-180.173
1	4	0	17.732	0
1	5	-438	4.862	-90.0864
1	6	0	2.86	0
2	1	1095	3.432	319.056
3	1	730	3.718	196.342
4	1	730	2.574	283.605
4	2	0	1.43	0
5	1	0	1.716	0
5	2	-438	0.572	-765.734
5	3	0	1.144	0
5	4	-511	1.144	-446.678
5	5	-219	4.004	-54.6953
1	1	7154	28.886	247.663
2	1	-803	6.578	-122.074
2	2	657	7.722	85.0816
2	3	-1387	13.156	-105.427
3	1	-11607	16.874	-687.863
4	1	-1752	15.73	-111.38
4	2	-876	3.146	-278.449
4	3	-73	9.438	-7.73469
5	1	657	2.002	328.172
6	1	-1022	2.574	-397.047
6	2	0	1.43	0
6	3	-657	1.43	-459.441
1	1	0	2.002	0
1	2	2920	14.014	208.363
2	1	1168	4.29	272.261
2	2	0	1.43	0
2	3	1168	4.576	255.245
3	1	146	3.718	39.2684
3	2	1387	4.29	323.31
3	3	146	3.718	39.2684
3	4	1460	6.292	232.041
4	1	1679	9.152	183.457
5	1	-5475	7.436	-736.283
5	2	-1387	3.432	-404.138
6	1	-876	2.288	-382.867
7	1	-1679	19.448	-86.3328
8	1	-365	10.01	-36.4635
1	1	-876	14.3	-61.2587
1	2	0	4.576	0
2	1	-1679	2.002	-838.661
2	2	-2847	6.292	-452.479
2	3	-3285	4.29	-765.734
3	1	219	39.182	5.5893
3	2	365	4.29	85.0816
3	3	-365	7.15	-51.049
4	1	1095	3.432	319.056
5	1	730	2.574	283.605
1	1	-8103	13.728	-590.253
2	1	876	5.148	170.163
2	2	2044	7.722	264.698
2	3	146	2.86	51.049
3	1	-584	0.858	-680.653
3	2	-438	12.87	-34.0326
3	3	-2993	8.58	-348.834
3	4	0	1.716	0
3	5	-292	1.43	-204.196
3	6	0	7.722	0
3	7	-730	3.146	-232.041
3	8	0	2.002	0
3	9	-803	2.288	-350.962
3	10	0	3.432	0
1	1	876	6.292	139.224
1	2	73	28.028	2.60454
1	3	876	15.158	57.7913
1	4	73	10.296	7.09013
1	5	365	3.146	116.02
2	1	-365	1.43	-255.245
2	2	73	4.004	18.2318
2	3	-1971	10.868	-181.358
3	1	0	9.438	0
3	2	438	5.434	80.6036
3	3	146	11.44	12.7622
4	1	-3650	10.582	-344.925
4	2	-73	2.288	-31.9056
4	3	-2847	8.58	-331.818
4	4	0	3.146	0
5	1	-1314	4.29	-306.294
5	2	-2117	14.014	-151.063

## Sheet: Kin3 Avg
Track	Segments	Total Distance(nm)	Total Duration(s)	Average Velocity(nm/s)
1	3	-511	18.304	-27.9174
2	5	-1022	12.012	-85.0816
3	4	-657	46.332	-14.1803
4	3	2190	9.724	225.216
5	1	1679	1.43	1174.13
1	10	10366	23.452	442.009
2	1	-1168	16.874	-69.2189
3	2	-2336	11.154	-209.432
4	5	-803	13.442	-59.7381
5	1	-1095	9.152	-119.646
6	1	-657	11.726	-56.0293
7	4	-1460	20.02	-72.9271
8	6	-584	30.316	-19.2638
9	1	-1314	10.582	-124.173
10	2	-1241	10.01	-123.976
11	3	-1679	8.008	-209.665
12	2	-657	61.49	-10.6847
13	6	73	48.334	1.51032
14	6	1241	23.166	53.5699
1	2	-4234	6.292	-672.918
2	7	-1460	58.058	-25.1473
3	2	-1022	9.152	-111.67
4	1	1168	2.002	583.417
5	1	1460	2.002	729.271
6	2	1095	12.584	87.0153
1	1	-2117	8.008	-264.361
2	3	-1241	14.872	-83.4454
3	1	5183	4.004	1294.46
4	2	2409	3.718	647.929
5	4	0	44.616	0
6	5	-146	98.384	-1.48398
1	1	-2190	4.576	-478.584
2	5	-803	17.732	-45.2854
1	8	-2044	22.308	-91.6263
2	2	5840	8.866	658.696
3	6	4599	15.444	297.786
4	7	-6205	53.196	-116.644
5	4	-5110	14.872	-343.599
1	8	4453	44.902	99.1715
2	3	-3066	7.436	-412.318
3	5	-2555	16.302	-156.729
4	8	-5621	41.47	-135.544
5	1	1606	26.312	61.0368
6	1	657	0.858	765.734
7	6	1387	23.166	59.8722
8	4	-511	9.438	-54.1428
1	4	-949	95.524	-9.93468
2	2	-803	8.008	-100.275
3	5	7227	15.73	459.441
4	2	657	15.158	43.3434
1	1	-949	16.588	-57.21
2	2	-2628	16.302	-161.207
3	14	584	70.642	8.26704
1	2	-1679	67.496	-24.8755
2	2	4672	8.008	583.417
3	2	1825	7.436	245.428
4	7	3504	14.3	245.035
5	1	2555	4.004	638.112
6	2	1752	9.438	185.633
7	1	949	0.858	1106.06
8	3	1022	17.446	58.5808
9	2	-4380	6.292	-696.122
1	1	-949	33.176	-28.605
2	4	3285	18.876	174.031
1	4	-2993	16.588	-180.432
2	1	-438	34.034	-12.8695
3	5	-2263	19.734	-114.675
4	2	-511	7.436	-68.7197
5	7	657	17.446	37.6591
6	2	1533	17.446	87.8711
7	2	1022	2.86	357.343
8	3	511	11.154	45.8132
9	2	365	12.012	30.3863
1	4	2555	18.876	135.357
2	5	4161	31.746	131.072
3	1	-3577	4.862	-735.705
4	3	-4088	4.576	-893.357
5	2	-2044	5.434	-376.15
6	2	-730	10.296	-70.9013
7	1	-1679	1.716	-978.438
8	1	2701	8.294	325.657
9	1	1022	2.574	397.047
10	1	1022	2.002	510.49
1	9	6059	33.748	179.537
2	1	1752	2.86	612.587
3	7	-2847	39.182	-72.6609
4	3	-2117	86.944	-24.349
5	2	-1898	62.348	-30.442
6	2	1679	13.728	122.305
1	3	584	27.17	21.4943
2	4	-584	14.3	-40.8392
1	3	-1679	75.79	-22.1533
2	7	9271	21.164	438.055
3	10	-6132	48.334	-126.867
4	5	-2044	28.028	-72.9271
5	2	1898	14.586	130.125
6	4	-803	24.596	-32.6476
7	2	1387	4.862	285.274
8	1	-4526	3.718	-1217.32
9	3	10658	15.444	690.106
10	1	-9198	8.294	-1108.99
11	4	-803	24.596	-32.6476
12	1	-438	11.726	-37.3529
13	2	1387	5.72	242.483
1	3	-949	19.448	-48.7968
2	1	-1241	8.866	-139.973
3	2	1168	2.288	510.49
4	2	1095	15.73	69.6122
5	1	1898	4.004	474.026
6	1	438	4.862	90.0864
7	2	657	9.438	69.6122
1	2	3796	5.148	737.374
2	1	1971	3.146	626.51
3	4	2044	17.732	115.272
4	3	803	23.166	34.6629
5	5	5621	10.868	517.206
1	1	-3066	75.79	-40.4539
1	4	-2263	26.026	-86.9515
2	7	-6570	27.742	-236.825
3	2	876	10.01	87.5125
1	1	-1168	16.302	-71.6477
2	1	-657	6.578	-99.8784
3	1	-1971	19.734	-99.8784
4	1	-657	10.582	-62.0866
5	7	-1971	24.882	-79.2139
6	2	-1752	21.164	-82.7821
7	1	-730	9.152	-79.764
8	3	-730	14.872	-49.0855
9	2	1022	6.864	148.893
10	1	2409	4.004	601.648
1	2	-876	15.73	-55.6898
2	1	4234	4.29	986.946
3	2	1314	8.58	153.147
4	1	2920	4.004	729.271
1	1	-1971	3.146	-626.51
2	3	-876	38.61	-22.6884
3	2	-292	7.15	-40.8392
4	3	-1679	11.44	-146.766
5	1	1387	1.43	969.93
6	1	1971	3.146	626.51
7	1	2044	1.716	1191.14
8	1	657	3.718	176.708
9	2	511	4.862	105.101
1	1	-1095	16.302	-67.1697
2	1	-949	8.58	-110.606
3	1	-438	10.868	-40.3018
4	1	-803	2.574	-311.966
5	3	3504	7.15	490.07
6	3	1679	20.306	82.6849
7	1	2482	5.148	482.129
8	2	1606	27.17	59.1093
9	2	2117	4.576	462.631
1	2	-949	13.442	-70.5996
2	2	2774	24.882	111.486
3	2	1606	10.868	147.773
4	2	365	16.588	22.0039
1	1	-730	6.578	-110.976
2	1	-1679	7.722	-217.431
3	3	-146	7.15	-20.4196
4	17	-14527	92.378	-157.256
1	4	-1241	18.59	-66.7563
1	3	7227	10.296	701.923
2	2	-1095	7.15	-153.147
3	1	-1387	4.004	-346.404
4	1	-3066	4.576	-670.017
5	2	657	14.3	45.9441
6	1	1314	1.716	765.734
1	3	5183	7.436	697.015
2	1	6205	6.864	903.992
3	13	-7154	87.802	-81.4788
1	1	-1022	7.722	-132.349
2	1	1314	2.002	656.344
3	1	146	13.728	10.6352
4	1	1387	3.146	440.877
1	1	4818	4.29	1123.08
2	3	3139	13.156	238.598
3	3	1606	19.448	82.5792
4	1	803	0.858	935.897
5	2	511	30.03	17.0163
6	2	-584	44.902	-13.0061
1	2	-876	53.768	-16.2922
2	2	-657	11.44	-57.4301
3	1	2044	4.862	420.403
4	6	-1898	78.936	-24.0448
1	4	-6424	23.452	-273.921
2	4	1460	8.294	176.031
3	2	-219	83.798	-2.61343
1	1	4453	4.576	973.121
2	1	2701	2.002	1349.15
3	3	4015	23.166	173.314
4	2	2336	3.432	680.653
1	7	-4015	28.6	-140.385
2	2	-1241	11.44	-108.479
3	1	-1752	16.588	-105.619
4	1	-1241	13.442	-92.3226
5	4	-4599	33.748	-136.275
6	2	-2117	28.6	-74.021
7	6	-2628	92.95	-28.2733
8	1	2409	2.288	1052.88
9	1	2409	2.288	1052.88
1	5	1898	66.066	28.7288
2	2	-1241	11.154	-111.261
3	1	-3066	13.728	-223.339
1	2	-7519	31.46	-239.002
2	4	-12775	47.762	-267.472
3	3	-3869	11.154	-346.871
4	3	-1679	26.026	-64.5124
5	2	-1314	10.01	-131.269
6	7	-5256	69.784	-75.3181
7	3	-2044	30.602	-66.793
8	5	-1168	23.452	-49.8039
1	1	1533	1.43	1072.03
2	1	1168	20.592	56.7211
3	5	1533	26.598	57.6359
4	1	1898	3.432	553.03
1	6	5256	30.03	175.025
2	1	438	1.43	306.294
1	1	4891	4.576	1068.84
2	3	2555	6.292	406.071
3	5	-1533	48.048	-31.9056
1	3	3066	6.292	487.285
2	7	-7884	46.618	-169.119
3	1	803	28.6	28.0769
4	2	6351	9.438	672.918
1	3	-511	38.038	-13.4339
2	2	-1314	12.584	-104.418
1	2	146	42.614	3.4261
2	1	1825	3.432	531.76
1	1	1825	2.574	709.013
2	1	4161	6.006	692.807
3	3	-1533	10.868	-141.056
4	3	1168	8.58	136.131

## Sheet: Kin3 Seg
Track	Segment	Distance(nm)	Duration(s)	Velocity(nm/s)
1	1	0	7.722	0
1	2	-292	2.86	-102.098
1	3	-219	7.722	-28.3605
2	1	-365	3.432	-106.352
2	2	0	3.718	0
2	3	-219	0.858	-255.245
2	4	0	3.146	0
2	5	-438	1.43	-306.294
3	1	-365	19.734	-18.496
3	2	0	5.148	0
3	3	-365	10.582	-34.4925
3	4	73	10.868	6.71697
4	1	292	6.864	42.5408
4	2	1241	1.144	1084.79
4	3	657	2.002	328.172
5	1	1679	1.43	1174.13
1	1	73	1.43	51.049
1	2	1241	1.716	723.193
1	3	0	1.144	0
1	4	1971	2.86	689.161
1	5	146	1.43	102.098
1	6	1752	2.002	875.125
1	7	73	1.144	63.8112
1	8	3212	6.006	534.799
1	9	73	2.002	36.4635
1	10	1971	4.004	492.258
2	1	-1168	16.874	-69.2189
3	1	-2263	4.862	-465.446
3	2	-73	6.578	-11.0976
4	1	-73	3.432	-21.2704
4	2	-511	2.002	-255.245
4	3	-73	2.574	-28.3605
4	4	-292	0.858	-340.326
4	5	73	5.148	14.1803
5	1	-1095	9.152	-119.646
6	1	-657	11.726	-56.0293
7	1	73	4.576	15.9528
7	2	-292	1.43	-204.196
7	3	-73	5.148	-14.1803
7	4	-1168	9.152	-127.622
8	1	0	2.86	0
8	2	-438	3.146	-139.224
8	3	73	10.296	7.09013
8	4	511	2.288	223.339
8	5	-657	6.006	-109.391
8	6	-73	5.72	-12.7622
9	1	-1314	10.582	-124.173
10	1	-730	2.574	-283.605
10	2	-511	7.436	-68.7197
11	1	-803	2.86	-280.769
11	2	-146	3.432	-42.5408
11	3	-730	2.002	-364.635
12	1	-657	20.592	-31.9056
12	2	0	40.898	0
13	1	219	5.148	42.5408
13	2	657	3.432	191.434
13	3	803	1.43	561.538
13	4	0	8.008	0
13	5	-1022	7.436	-137.439
13	6	-584	22.88	-25.5245
14	1	0	6.864	0
14	2	-438	2.574	-170.163
14	3	0	2.002	0
14	4	292	1.144	255.245
14	5	0	6.006	0
14	6	1314	5.148	255.245
1	1	-438	1.716	-255.245
1	2	-3796	4.576	-829.545
2	1	-73	32.032	-2.27897
2	2	-730	3.146	-232.041
2	3	219	0.858	255.245
2	4	0	3.146	0
2	5	-365	0.572	-638.112
2	6	-73	9.438	-7.73469
2	7	-438	8.58	-51.049
3	1	-949	4.004	-237.013
3	2	-73	5.148	-14.1803
4	1	1168	2.002	583.417
5	1	1460	2.002	729.271
6	1	1095	5.148	212.704
6	2	0	7.436	0
1	1	-2117	8.008	-264.361
2	1	0	2.86	0
2	2	-584	9.724	-60.0576
2	3	-657	2.574	-255.245
3	1	5183	4.004	1294.46
4	1	1022	2.574	397.047
4	2	1460	1.144	1276.22
5	1	-1095	1.43	-765.734
5	2	146	19.734	7.3984
5	3	949	10.868	87.3206
5	4	0	12.298	0
6	1	-73	7.436	-9.81711
6	2	803	5.148	155.983
6	3	-219	55.77	-3.92684
6	4	-365	4.004	-91.1588
6	5	-219	26.026	-8.41466
1	1	-2190	4.576	-478.584
2	1	-73	4.576	-15.9528
2	2	-584	1.716	-340.326
2	3	73	7.722	9.45351
2	4	-219	1.716	-127.622
2	5	0	2.002	0
1	1	146	6.006	24.309
1	2	-511	3.146	-162.428
1	3	0	1.144	0
1	4	-876	2.574	-340.326
1	5	0	1.43	0
1	6	-511	1.144	-446.678
1	7	-219	2.574	-85.0816
1	8	-73	4.29	-17.0163
2	1	5840	7.15	816.783
2	2	0	1.716	0
3	1	1898	4.004	474.026
3	2	-73	5.148	-14.1803
3	3	803	1.144	701.923
3	4	0	1.716	0
3	5	365	1.716	212.704
3	6	1606	1.716	935.897
4	1	-73	2.002	-36.4635
4	2	-2336	4.862	-480.461
4	3	0	2.288	0
4	4	-949	3.146	-301.653
4	5	-219	3.432	-63.8112
4	6	-2409	8.294	-290.451
4	7	-219	29.172	-7.5072
5	1	-1679	3.432	-489.219
5	2	-219	1.716	-127.622
5	3	0	2.002	0
5	4	-3139	7.722	-406.501
1	1	0	1.43	0
1	2	584	1.43	408.392
1	3	0	2.574	0
1	4	2190	3.718	589.026
1	5	146	3.432	42.5408
1	6	0	4.576	0
1	7	1533	2.574	595.571
1	8	73	25.454	2.86792
2	1	-730	2.288	-319.056
2	2	0	1.716	0
2	3	-2336	3.432	-680.653
3	1	0	5.72	0
3	2	-1825	3.146	-580.102
3	3	-73	4.29	-17.0163
3	4	-657	2.002	-328.172
3	5	0	1.43	0
4	1	0	2.86	0
4	2	-657	6.578	-99.8784
4	3	-657	2.002	-328.172
4	4	0	1.43	0
4	5	-2190	8.866	-247.011
4	6	0	3.432	0
4	7	-1460	8.008	-182.318
4	8	-803	8.294	-96.817
5	1	1606	26.312	61.0368
6	1	657	0.858	765.734
7	1	657	0.572	1148.6
7	2	0	3.146	0
7	3	292	1.144	255.245
7	4	0	5.434	0
7	5	365	2.002	182.318
7	6	73	11.154	6.54474
8	1	-803	1.43	-561.538
8	2	657	5.434	120.905
8	3	0	1.43	0
8	4	-292	1.144	-255.245
1	1	0	82.082	0
1	2	-365	2.86	-127.622
1	3	-73	8.294	-8.80154
1	4	-438	2.288	-191.434
2	1	-876	4.576	-191.434
2	2	73	3.432	21.2704
3	1	1898	2.574	737.374
3	2	1971	1.144	1722.9
3	3	1533	2.574	595.571
3	4	1606	6.578	244.147
3	5	219	2.574	85.0816
4	1	730	1.716	425.408
4	2	-73	13.728	-5.3176
1	1	-949	16.588	-57.21
2	1	0	12.87	0
2	2	-2628	3.432	-765.734
3	1	219	7.722	28.3605
3	2	803	3.146	255.245
3	3	146	11.44	12.7622
3	4	438	3.718	117.805
3	5	0	5.148	0
3	6	-438	2.002	-218.781
3	7	292	1.144	255.245
3	8	73	10.868	6.71697
3	9	-219	1.43	-153.147
3	10	365	1.716	212.704
3	11	73	6.292	11.602
3	12	-803	3.718	-215.976
3	13	0	3.146	0
3	14	-365	9.438	-38.6734
1	1	-438	7.436	-58.9026
1	2	-1314	60.06	-21.8781
2	1	0	2.002	0
2	2	4672	6.006	777.889
3	1	146	4.862	30.0288
3	2	1679	2.574	652.292
4	1	1314	1.716	765.734
4	2	219	1.716	127.622
4	3	1460	2.002	729.271
4	4	73	1.144	63.8112
4	5	-146	1.43	-102.098
4	6	657	3.432	191.434
4	7	73	2.86	25.5245
5	1	2555	4.004	638.112
6	1	1679	6.292	266.847
6	2	0	3.146	0
7	1	949	0.858	1106.06
8	1	73	6.292	11.602
8	2	730	1.716	425.408
8	3	219	9.438	23.2041
9	1	-3869	4.862	-795.763
9	2	-438	1.716	-255.245
1	1	-949	33.176	-28.605
2	1	438	3.718	117.805
2	2	146	7.15	20.4196
2	3	1241	2.002	619.88
2	4	1460	6.292	232.041
1	1	-730	4.29	-170.163
1	2	-219	5.434	-40.3018
1	3	-1679	4.576	-366.914
1	4	-438	2.288	-191.434
2	1	-438	34.034	-12.8695
3	1	0	2.288	0
3	2	-1168	5.434	-214.943
3	3	0	2.002	0
3	4	-1095	1.716	-638.112
3	5	0	8.294	0
4	1	-511	5.72	-89.3357
4	2	0	2.002	0
5	1	0	2.288	0
5	2	438	0.858	510.49
5	3	0	1.716	0
5	4	-219	0.858	-255.245
5	5	803	9.152	87.7404
5	6	-365	1.144	-319.056
5	7	0	1.716	0
6	1	1460	4.29	340.326
6	2	73	13.156	5.5488
7	1	73	1.43	51.049
7	2	949	1.43	663.636
8	1	73	4.29	17.0163
8	2	365	1.144	319.056
8	3	73	5.72	12.7622
9	1	365	2.86	127.622
9	2	0	9.152	0
1	1	1898	2.86	663.636
1	2	146	2.86	51.049
1	3	949	1.144	829.545
1	4	73	4.862	15.0144
1	5	803	4.862	165.158
1	6	0	3.432	0
1	7	1898	10.01	189.61
1	8	0	2.288	0
1	9	365	1.43	255.245
2	1	1752	2.86	612.587
3	1	-73	4.004	-18.2318
3	2	365	2.288	159.528
3	3	-1095	8.58	-127.622
3	4	-73	2.86	-25.5245
3	5	-584	5.148	-113.442
3	6	-1022	9.724	-105.101
3	7	-438	7.15	-61.2587
4	1	-1314	60.06	-21.8781
4	2	-657	4.862	-135.13
4	3	-146	22.022	-6.62973
5	1	-219	38.896	-5.6304
5	2	-1679	23.452	-71.593
6	1	1606	6.578	244.147
6	2	73	7.436	9.81711
1	1	73	3.146	23.2041
1	2	730	7.15	102.098
1	3	1679	2.86	587.063
1	4	73	6.006	12.1545
2	1	73	9.438	7.73469
2	2	657	5.72	114.86
2	3	292	9.438	30.9388
2	4	3139	5.72	548.776
2	5	0	2.002	0
3	1	-3577	4.862	-735.705
4	1	-1022	0.858	-1191.14
4	2	-1241	2.002	-619.88
4	3	-1825	1.716	-1063.52
5	1	0	3.146	0
5	2	-2044	2.288	-893.357
6	1	0	5.72	0
6	2	-730	4.576	-159.528
7	1	-1679	1.716	-978.438
8	1	2701	8.294	325.657
9	1	1022	2.574	397.047
10	1	1022	2.002	510.49
1	1	73	2.288	31.9056
1	2	511	1.716	297.786
1	3	73	23.166	3.15117
2	1	-73	3.146	-23.2041
2	2	584	5.72	102.098
2	3	0	2.288	0
2	4	-1022	3.146	-324.857
1	1	-730	45.188	-16.1547
1	2	-73	5.434	-13.4339
1	3	-949	25.454	-37.2829
2	1	730	1.144	638.112
2	2	73	5.148	14.1803
2	3	657	1.144	574.301
2	4	0	1.716	0
2	5	4015	5.148	779.915
2	6	292	2.288	127.622
2	7	3431	5.148	666.472
3	1	-438	0.858	-510.49
3	2	-73	2.288	-31.9056
3	3	-1095	2.574	-425.408
3	4	0	1.716	0
3	5	-1241	3.718	-333.782
3	6	-73	3.718	-19.6342
3	7	-2117	11.154	-189.797
3	8	-146	10.01	-14.5854
3	9	-876	2.86	-306.294
3	10	-219	9.724	-22.5216
4	1	-146	4.862	-30.0288
4	2	-1022	6.864	-148.893
4	3	-219	5.72	-38.2867
4	4	0	5.148	0
4	5	-657	5.148	-127.622
5	1	1825	2.574	709.013
5	2	73	12.012	6.07726
6	1	-73	5.72	-12.7622
6	2	-1825	6.292	-290.051
6	3	73	3.718	19.6342
6	4	1022	8.866	115.272
7	1	1387	1.43	969.93
7	2	0	3.432	0
8	1	-4526	3.718	-1217.32
9	1	10877	10.01	1086.61
9	2	73	3.146	23.2041
9	3	-292	2.002	-145.854
10	1	-9198	8.294	-1108.99
11	1	-73	5.72	-12.7622
11	2	-1825	6.292	-290.051
11	3	73	3.718	19.6342
11	4	1022	8.866	115.272
12	1	-438	11.726	-37.3529
13	1	1387	1.43	969.93
13	2	73	4.29	17.0163
1	1	-73	3.718	-19.6342
1	2	-730	3.146	-232.041
1	3	-146	12.584	-11.602
2	1	-1241	8.866	-139.973
3	1	1168	1.144	1020.98
3	2	0	1.144	0
4	1	1022	4.29	238.228
4	2	146	11.44	12.7622
5	1	1898	4.004	474.026
6	1	438	4.862	90.0864
7	1	0	3.146	0
7	2	657	6.292	104.418
1	1	3796	3.432	1106.06
1	2	0	2.002	0
2	1	1971	3.146	626.51
3	1	1095	3.146	348.061
3	2	0	1.43	0
3	3	949	4.576	207.386
3	4	-73	8.866	-8.2337
4	1	146	5.148	28.3605
4	2	584	5.148	113.442
4	3	73	12.87	5.67211
5	1	3869	2.86	1352.8
5	2	0	1.43	0
5	3	1022	0.858	1191.14
5	4	73	4.862	15.0144
5	5	584	1.144	510.49
1	1	-3066	75.79	-40.4539
1	1	-1095	16.302	-67.1697
2	1	-949	8.58	-110.606
3	1	-438	10.868	-40.3018
4	1	-803	2.574	-311.966
5	1	2190	3.146	696.122
5	2	146	2.002	72.9271
5	3	1241	2.002	619.88
6	1	146	5.148	28.3605
6	2	1241	7.15	173.566
6	3	365	8.294	44.0077
7	1	2482	5.148	482.129
8	1	-292	9.438	-30.9388
8	2	1898	17.732	107.038
9	1	146	2.002	72.9271
9	2	1971	2.574	765.734
1	1	0	8.008	0
1	2	-803	4.576	-175.481
1	3	-1387	2.574	-538.85
1	4	0	11.154	0
2	1	0	2.288	0
2	2	-438	0.858	-510.49
2	3	-292	7.436	-39.2684
2	4	-1387	3.146	-440.877
2	5	-292	3.146	-92.8163
2	6	-4234	7.722	-548.304
2	7	0	3.146	0
3	1	803	2.002	401.099
3	2	0	8.008	0
1	1	-1168	16.302	-71.6477
2	1	-657	6.578	-99.8784
3	1	-1971	19.734	-99.8784
4	1	-657	10.582	-62.0866
5	1	-511	11.44	-44.6678
5	2	-584	0.858	-680.653
5	3	-438	3.718	-117.805
5	4	146	1.43	102.098
5	5	-219	2.288	-95.7168
5	6	0	2.86	0
5	7	-511	2.288	-223.339
6	1	-1971	12.012	-164.086
6	2	219	9.152	23.9292
7	1	-730	9.152	-79.764
8	1	0	2.574	0
8	2	-657	4.29	-153.147
8	3	-73	8.008	-9.11588
9	1	1022	2.574	397.047
9	2	73	4.29	17.0163
10	1	2409	4.004	601.648
1	1	-803	10.296	-77.9915
1	2	-73	5.72	-12.7622
2	1	4234	4.29	986.946
3	1	1314	5.148	255.245
3	2	0	3.146	0
4	1	2920	4.004	729.271
1	1	-1971	3.146	-626.51
2	1	-73	3.432	-21.2704
2	2	-1095	5.148	-212.704
2	3	219	30.03	7.29271
3	1	219	3.146	69.6122
3	2	-511	4.004	-127.622
4	1	-1095	0.858	-1276.22
4	2	-584	2.574	-226.884
4	3	0	7.722	0
5	1	1387	1.43	969.93
6	1	1971	3.146	626.51
7	1	2044	1.716	1191.14
8	1	657	3.718	176.708
9	1	0	3.146	0
9	2	511	1.716	297.786
1	1	-73	7.15	-10.2098
1	2	-949	6.292	-150.826
2	1	2482	6.292	394.469
2	2	292	18.59	15.7074
3	1	1533	4.576	335.009
3	2	146	6.292	23.2041
4	1	511	10.582	48.2895
4	2	-73	6.006	-12.1545
1	1	-730	6.578	-110.976
2	1	-1679	7.722	-217.431
3	1	-1606	3.718	-431.953
3	2	0	2.288	0
3	3	1387	1.43	969.93
4	1	-657	3.432	-191.434
4	2	0	2.288	0
4	3	-584	2.86	-204.196
4	4	0	3.718	0
4	5	-1168	3.432	-340.326
4	6	-73	4.576	-15.9528
4	7	-730	2.574	-283.605
4	8	0	2.86	0
4	9	-1533	6.006	-255.245
4	10	0	1.716	0
4	11	-1752	4.862	-360.346
4	12	0	0.858	0
4	13	-3285	18.018	-182.318
4	14	-365	10.296	-35.4507
4	15	-3066	10.868	-282.113
4	16	-146	9.438	-15.4694
4	17	-1314	4.576	-287.15
1	1	-438	2.288	-191.434
1	2	0	5.148	0
1	3	-438	3.718	-117.805
1	4	-365	7.722	-47.2675
1	1	511	3.718	137.439
1	2	1022	2.288	446.678
1	3	5694	4.576	1244.32
2	1	0	3.146	0
2	2	-1095	4.004	-273.477
3	1	-1387	4.004	-346.404
4	1	-3066	4.576	-670.017
5	1	657	5.434	120.905
5	2	0	8.866	0
6	1	1314	1.716	765.734
1	1	949	1.144	829.545
1	2	292	1.144	255.245
1	3	3942	5.148	765.734
2	1	6205	6.864	903.992
3	1	-73	20.02	-3.64635
3	2	-584	12.87	-45.3768
3	3	0	2.288	0
3	4	-365	2.288	-159.528
3	5	0	2.002	0
3	6	-292	2.002	-145.854
3	7	-146	6.578	-22.1952
3	8	-876	6.578	-133.171
3	9	0	2.002	0
3	10	-2482	16.302	-152.251
3	11	-1022	3.718	-274.879
3	12	-73	3.718	-19.6342
3	13	-1314	7.436	-176.708
1	1	-1022	7.722	-132.349
2	1	1314	2.002	656.344
3	1	146	13.728	10.6352
4	1	1387	3.146	440.877
1	1	4818	4.29	1123.08
2	1	2628	5.148	510.49
2	2	584	5.434	107.471
2	3	0	2.574	0
3	1	146	4.004	36.4635
3	2	1387	4.576	303.103
3	3	73	10.582	6.89851
4	1	803	0.858	935.897
5	1	292	4.862	60.0576
5	2	146	24.882	5.8677
6	1	-146	21.45	-6.80653
6	2	-438	23.452	-18.6764
1	1	-292	42.614	-6.85221
1	2	-584	11.154	-52.3579
2	1	0	4.576	0
2	2	-657	6.864	-95.7168
3	1	2044	4.862	420.403
4	1	0	4.576	0
4	2	-876	3.432	-255.245
4	3	0	2.288	0
4	4	-219	0.858	-255.245
4	5	-292	60.918	-4.79333
4	6	-584	7.15	-81.6783
1	1	-4088	5.148	-794.095
1	2	-292	3.432	-85.0816
1	3	0	3.146	0
1	4	-1971	11.726	-168.088
2	1	584	4.862	120.115
2	2	0	1.144	0
2	3	876	1.43	612.587
2	4	0	1.144	0
3	1	0	73.216	0
3	2	-219	10.582	-20.6955
1	1	4453	4.576	973.121
2	1	2701	2.002	1349.15
3	1	2555	7.15	357.343
3	2	1387	6.578	210.854
3	3	146	9.438	15.4694
4	1	1971	1.43	1378.32
4	2	438	2.002	218.781
1	1	0	10.296	0
1	2	-292	1.716	-170.163
1	3	0	5.72	0
1	4	-511	1.716	-297.786
1	5	-146	1.43	-102.098
1	6	-803	1.43	-561.538
1	7	-2336	6.864	-340.326
2	1	-219	6.292	-34.8061
2	2	-1022	5.148	-198.524
3	1	-1752	16.588	-105.619
4	1	-1241	13.442	-92.3226
5	1	-730	8.58	-85.0816
5	2	146	10.868	13.4339
5	3	-2336	11.726	-199.215
5	4	-1679	2.574	-652.292
6	1	219	12.012	18.2318
6	2	-2336	16.588	-140.825
7	1	-511	17.446	-29.2904
7	2	-146	13.442	-10.8615
7	3	-292	2.86	-102.098
7	4	-511	33.462	-15.2711
7	5	-803	10.296	-77.9915
7	6	-365	15.73	-23.2041
8	1	2409	2.288	1052.88
9	1	2409	2.288	1052.88
1	1	73	12.012	6.07726
1	2	1241	7.436	166.891
1	3	0	7.15	0
1	4	438	2.002	218.781
1	5	146	37.466	3.89687
2	1	73	6.864	10.6352
2	2	-1314	4.576	-287.15
3	1	-3066	13.728	-223.339
1	1	0	15.158	0
1	2	-7519	16.302	-461.232
2	1	-4161	8.58	-484.965
2	2	-73	2.86	-25.5245
2	3	-7811	30.316	-257.653
2	4	-730	5.72	-127.622
3	1	-1168	4.576	-255.245
3	2	-2044	4.29	-476.457
3	3	-657	2.288	-287.15
4	1	-730	18.59	-39.2684
4	2	-730	2.574	-283.605
4	3	-219	5.148	-42.5408
5	1	73	6.292	11.602
5	2	-1314	3.718	-353.416
6	1	-1533	3.718	-412.318
6	2	-146	3.718	-39.2684
6	3	-438	1.144	-382.867
6	4	-146	3.146	-46.4081
6	5	-730	1.43	-510.49
6	6	-1387	13.442	-103.184
6	7	-876	43.472	-20.1509
7	1	-1314	20.592	-63.8112
7	2	-657	4.29	-153.147
7	3	-73	6.006	-12.1545
8	1	73	8.866	8.2337
8	2	-730	2.86	-255.245
8	3	0	3.718	0
8	4	-584	3.146	-185.633
8	5	0	4.576	0
1	1	1533	1.43	1072.03
2	1	1168	20.592	56.7211
3	1	0	3.146	0
3	2	1460	8.294	176.031
3	3	73	4.29	17.0163
3	4	584	1.716	340.326
3	5	-657	9.152	-71.7876
4	1	1898	3.432	553.03
1	1	1022	1.43	714.685
1	2	0	4.576	0
1	3	3066	3.432	893.357
1	4	365	6.006	60.7726
1	5	657	1.716	382.867
1	6	219	13.156	16.6464
2	1	438	1.43	306.294
1	1	4891	4.576	1068.84
2	1	365	2.002	182.318
2	2	2117	1.43	1480.42
2	3	0	2.86	0
3	1	0	5.434	0
3	2	-657	10.01	-65.6344
3	3	73	9.438	7.73469
3	4	-438	3.146	-139.224
3	5	-511	20.306	-25.165
1	1	1752	2.002	875.125
1	2	0	2.574	0
1	3	1387	1.716	808.275
2	1	-292	1.716	-170.163
2	2	0	3.146	0
2	3	-1533	7.722	-198.524
2	4	0	2.574	0
2	5	-3942	14.872	-265.062
2	6	73	3.432	21.2704
2	7	-2190	13.156	-166.464
3	1	803	28.6	28.0769
4	1	584	2.002	291.708
4	2	5840	7.15	816.783
1	1	146	22.022	6.62973
1	2	-584	8.008	-72.9271
1	3	0	8.008	0
2	1	0	4.576	0
2	2	-1314	8.008	-164.086
1	1	1095	26.598	41.1685
1	2	-949	16.016	-59.2532
2	1	1825	3.432	531.76
1	1	1825	2.574	709.013
2	1	4161	6.006	692.807
3	1	-365	3.146	-116.02
3	2	-73	3.146	-23.2041
3	3	-1095	4.576	-239.292
4	1	0	4.29	0
4	2	1022	1.43	714.685
4	3	219	2.86	76.5734

## Sheet: DDB Avg
Track	Segments	Total Distance(nm)	Total Duration(s)	Average Velocity(nm/s)
1	1	-2555	4.29	-595.571
2	2	-2920	5.72	-510.49
3	1	-5183	7.15	-724.895
4	4	-949	14.586	-65.0624
5	1	-219	13.156	-16.6464
6	1	-2701	3.432	-787.005
7	1	-2117	2.574	-822.455
1	5	-4599	21.164	-217.303
2	3	-1387	14.014	-98.9725
3	1	-292	25.168	-11.602
1	6	3796	18.304	207.386
2	2	1095	15.73	69.6122
3	2	1387	19.162	72.3828
4	2	3577	15.158	235.981
5	3	4745	8.294	572.1
6	1	730	10.582	68.9851
7	2	584	18.59	31.4147
8	1	365	35.75	10.2098
1	1	-2920	5.148	-567.211
2	2	-1387	8.294	-167.229
3	1	-2628	4.29	-612.587
4	5	-5694	31.746	-179.361
5	1	-1533	2.574	-595.571
6	1	-1022	2.288	-446.678
7	4	-1314	21.45	-61.2587
1	2	-730	8.294	-88.0154
2	4	-2774	24.882	-111.486
3	5	-2482	19.734	-125.773
1	1	-2774	3.146	-881.755
2	1	-3139	29.458	-106.558
3	3	-2482	12.87	-192.852
1	1	-9198	10.582	-869.212
2	3	-2993	14.014	-213.572
3	3	-584	16.302	-35.8238
4	3	-949	12.87	-73.7374
5	3	-1095	10.01	-109.391
6	1	-3504	28.314	-123.755
7	1	-1314	24.31	-54.0518
8	3	-1314	6.864	-191.434
1	1	-3504	4.29	-816.783
2	4	-657	9.152	-71.7876
3	5	-4964	17.16	-289.277
4	1	-1314	3.432	-382.867
5	4	-2190	16.016	-136.738
6	2	-657	6.006	-109.391
7	5	-1022	19.448	-52.5504
1	1	-1825	1.43	-1276.22
2	1	-7300	18.876	-386.734
3	3	-6278	11.726	-535.391
4	2	-1460	10.296	-141.803
5	3	-1752	18.304	-95.7168
6	4	-1387	11.726	-118.284
1	4	-3066	49.764	-61.6108
2	4	-9417	20.592	-457.314
3	1	-730	7.436	-98.1711
4	2	-5037	20.592	-244.61
5	1	-2555	19.162	-133.337
1	1	-803	1.144	-701.923
2	4	-3431	10.582	-324.23
3	7	-2774	15.158	-183.006
1	1	-657	16.016	-41.0215
2	1	-1022	3.146	-324.857
3	1	-1752	2.574	-680.653
4	1	-1752	25.168	-69.6122
5	4	-5840	16.302	-358.238
6	1	-730	1.144	-638.112
7	2	-657	4.29	-153.147
1	1	-6059	8.008	-756.618
2	4	-3723	13.156	-282.989
3	1	-657	2.288	-287.15
4	1	-2701	8.008	-337.288
5	1	-1095	46.618	-23.4888
1	1	-1971	4.004	-492.258
2	5	-4234	12.584	-336.459
3	1	-1168	2.574	-453.768
4	1	-1679	2.002	-838.661
5	1	-1825	7.436	-245.428
1	4	-5110	24.024	-212.704
2	1	-7519	10.582	-710.546
3	2	-1022	8.008	-127.622
1	3	-8322	13.442	-619.104
2	2	-3796	13.442	-282.398
3	1	-3285	4.004	-820.43
4	1	-803	1.716	-467.949
5	6	-3577	80.08	-44.6678
6	1	-3431	4.576	-749.781
7	2	-657	9.152	-71.7876
1	1	-3212	3.718	-863.905
2	1	-5402	8.58	-629.604
3	3	-1679	6.292	-266.847
4	6	-3650	25.454	-143.396
1	1	-10220	10.01	-1020.98
2	3	-13578	19.162	-708.59
3	1	-949	1.144	-829.545
4	3	-1387	4.29	-323.31
5	1	-1533	3.146	-487.285
1	1	-3650	7.15	-510.49
2	1	-9782	12.584	-777.336
3	2	-876	8.58	-102.098
4	4	-1533	12.584	-121.821
5	1	-2117	1.716	-1233.68
6	1	-2263	4.004	-565.185
7	1	-1387	2.288	-606.206
8	1	-1460	3.146	-464.081
9	5	-2263	23.738	-95.3324
1	5	-16936	18.59	-911.027
2	1	-4818	11.154	-431.953
3	1	-2409	4.576	-526.442
4	1	-876	1.43	-612.587
5	3	-2847	19.448	-146.39
6	3	-2628	14.3	-183.776
7	1	-3504	4.862	-720.691
8	2	-1387	4.29	-323.31
9	4	-584	16.302	-35.8238
10	1	-2774	3.432	-808.275
11	5	-3212	12.87	-249.573
12	7	-3577	15.158	-235.981
13	3	-4599	8.58	-536.014
14	1	-2993	6.578	-455.002
15	3	-1679	7.722	-217.431
1	1	-1606	6.006	-267.399
2	1	-1825	17.446	-104.609
3	2	-949	38.896	-24.3984
4	3	-1971	13.442	-146.63
5	3	-2701	14.3	-188.881
6	1	-657	1.43	-459.441

## Sheet: DDB Seg
Track	Segment	Distance(nm)	Duration(s)	Velocity(nm/s)
1	1	-2555	4.29	-595.571
2	1	-1898	2.574	-737.374
2	2	-1022	3.146	-324.857
3	1	-5183	7.15	-724.895
4	1	-657	3.718	-176.708
4	2	0	6.006	0
4	3	-292	1.43	-204.196
4	4	0	3.146	0
5	1	-219	13.156	-16.6464
6	1	-2701	3.432	-787.005
7	1	-2117	2.574	-822.455
1	1	1898	5.148	368.687
1	2	0	2.288	0
1	3	-1533	3.432	-446.678
1	4	0	1.716	0
1	5	-365	1.716	-212.704
1	6	0	4.004	0
2	1	-876	2.288	-382.867
2	2	-219	13.442	-16.2922
3	1	-1387	7.15	-193.986
3	2	0	12.298	0
4	1	0	3.718	0
4	2	-3577	11.44	-312.675
5	1	-3066	5.148	-595.571
5	2	-219	2.288	-95.7168
5	3	-1387	0.858	-1616.55
6	1	-730	10.582	-68.9851
7	1	-584	10.582	-55.1881
7	2	0	7.722	0
8	1	-365	35.75	-10.2098
1	1	-1898	5.434	-349.282
1	2	0	1.716	0
1	3	-1825	5.434	-335.848
1	4	-73	6.292	-11.602
1	5	-803	2.574	-311.966
2	1	-73	2.002	-36.4635
2	2	-1241	3.718	-333.782
2	3	-73	8.58	-8.50816
3	1	-292	25.168	-11.602
1	1	-2920	5.148	-567.211
2	1	-1314	4.862	-270.259
2	2	-73	3.432	-21.2704
3	1	-2628	4.29	-612.587
4	1	-730	13.728	-53.176
4	2	0	4.862	0
4	3	-1168	2.288	-510.49
4	4	0	2.288	0
4	5	-3723	8.294	-448.879
5	1	-1533	2.574	-595.571
6	1	-1022	2.288	-446.678
7	1	-803	6.864	-116.987
7	2	0	2.574	0
7	3	-438	0.858	-510.49
7	4	-73	10.868	-6.71697
1	1	-146	5.72	-25.5245
1	2	-584	2.574	-226.884
2	1	-73	4.29	-17.0163
2	2	-657	3.432	-191.434
2	3	-146	7.436	-19.6342
2	4	-1898	10.01	-189.61
3	1	-1168	6.292	-185.633
3	2	-219	7.436	-29.4513
3	3	-292	2.002	-145.854
3	4	0	1.144	0
3	5	-803	2.86	-280.769
1	1	-2774	3.146	-881.755
2	1	-3139	29.458	-106.558
3	1	-730	5.434	-134.339
3	2	-1752	4.576	-382.867
3	3	-73	2.86	-25.5245
1	1	-9198	10.582	-869.212
2	1	-1460	4.576	-319.056
2	2	0	2.002	0
2	3	-1533	7.15	-214.406
3	1	73	9.724	7.5072
3	2	-584	2.86	-204.196
3	3	-146	4.004	-36.4635
4	1	-292	6.578	-44.3904
4	2	-511	1.43	-357.343
4	3	-146	5.148	-28.3605
5	1	-657	3.146	-208.837
5	2	0	5.434	0
5	3	-511	1.43	-357.343
6	1	-3504	28.314	-123.755
7	1	-1314	24.31	-54.0518
8	1	-584	1.144	-510.49
8	2	0	4.29	0
8	3	-730	1.43	-510.49
1	1	-3504	4.29	-816.783
2	1	-146	0.572	-255.245
2	2	-73	3.718	-19.6342
2	3	-438	1.716	-255.245
2	4	0	3.146	0
3	1	-365	1.144	-319.056
3	2	0	1.716	0
3	3	-1022	2.002	-510.49
3	4	0	2.288	0
3	5	-3577	9.724	-367.853
4	1	-1314	3.432	-382.867
5	1	0	3.146	0
5	2	-511	2.002	-255.245
5	3	-73	5.434	-13.4339
5	4	-1606	5.434	-295.547
6	1	-584	1.144	-510.49
6	2	-73	5.148	-14.1803
7	1	0	2.574	0
7	2	-365	0.572	-638.112
7	3	-146	6.578	-22.1952
7	4	-365	1.43	-255.245
7	5	-146	8.294	-17.6031
1	1	-1825	1.43	-1276.22
2	1	-7300	18.876	-386.734
3	1	-1095	1.716	-638.112
3	2	-73	2.86	-25.5245
3	3	-5110	7.15	-714.685
4	1	-1387	6.864	-202.069
4	2	0	3.432	0
5	1	-657	8.58	-76.5734
5	2	-511	1.43	-357.343
5	3	-657	8.294	-79.2139
6	1	0	2.288	0
6	2	-949	3.718	-255.245
6	3	0	2.288	0
6	4	-438	3.146	-139.224
1	1	-438	6.578	-66.5856
1	2	-73	4.576	-15.9528
1	3	-1971	13.442	-146.63
1	4	-584	25.168	-23.2041
2	1	-2044	6.578	-310.733
2	2	-1898	2.574	-737.374
2	3	-657	4.004	-164.086
2	4	-4818	7.436	-647.929
3	1	-730	7.436	-98.1711
4	1	-73	5.72	-12.7622
4	2	-4964	14.872	-333.782
5	1	-2555	19.162	-133.337
1	1	-803	1.144	-701.923
2	1	-730	1.144	-638.112
2	2	-146	2.86	-51.049
2	3	-2555	4.862	-525.504
2	4	0	1.716	0
3	1	-657	2.574	-255.245
3	2	0	1.144	0
3	3	-438	1.144	-382.867
3	4	0	2.574	0
3	5	-219	0.572	-382.867
3	6	0	1.716	0
3	7	-1387	5.72	-242.483
1	1	-657	16.016	-41.0215
2	1	-1022	3.146	-324.857
3	1	-1752	2.574	-680.653
4	1	-1752	25.168	-69.6122
5	1	-73	2.002	-36.4635
5	2	-1387	5.434	-255.245
5	3	-146	3.432	-42.5408
5	4	-4307	5.434	-792.602
6	1	-730	1.144	-638.112
7	1	0	3.146	0
7	2	-657	1.43	-459.441
1	1	-6059	8.008	-756.618
2	1	0	3.146	0
2	2	-1606	3.432	-467.949
2	3	0	2.002	0
2	4	-2117	4.576	-462.631
3	1	-657	2.288	-287.15
4	1	-2701	8.008	-337.288
5	1	-1095	46.618	-23.4888
1	1	-1971	4.004	-492.258
2	1	-657	1.144	-574.301
2	2	0	2.86	0
2	3	-1898	3.146	-603.306
2	4	-730	3.146	-232.041
2	5	-949	2.002	-474.026
3	1	-1168	2.574	-453.768
4	1	-1679	2.002	-838.661
5	1	-1825	7.436	-245.428
1	1	-1387	2.002	-692.807
1	2	-1022	10.296	-99.2618
1	3	0	5.72	0
1	4	-2774	6.292	-440.877
2	1	-7519	10.582	-710.546
3	1	-1022	4.862	-210.202
3	2	0	3.146	0
1	1	-4526	6.006	-753.58
1	2	-1387	4.29	-323.31
1	3	-2482	3.146	-788.938
2	1	-1460	10.582	-137.97
2	2	-2336	3.146	-742.53
3	1	-3285	4.004	-820.43
4	1	-803	1.716	-467.949
5	1	-803	6.578	-122.074
5	2	0	2.288	0
5	3	-1679	4.29	-391.375
5	4	0	1.716	0
5	5	-803	1.716	-467.949
5	6	-219	64.064	-3.41846
6	1	-3431	4.576	-749.781
7	1	0	7.436	0
7	2	-657	2.002	-328.172
1	1	-3212	3.718	-863.905
2	1	-5402	8.58	-629.604
3	1	-1022	2.574	-397.047
3	2	-73	2.288	-31.9056
3	3	-657	1.144	-574.301
4	1	-1606	3.432	-467.949
4	2	-219	7.15	-30.6294
4	3	-949	5.148	-184.343
4	4	0	3.146	0
4	5	-949	4.862	-195.187
4	6	0	2.002	0
1	1	-10220	10.01	-1020.98
2	1	-8760	12.012	-729.271
2	2	-1095	2.86	-382.867
2	3	-3796	4.004	-948.052
3	1	-949	1.144	-829.545
4	1	-949	2.288	-414.773
4	2	0	0.858	0
4	3	-438	1.144	-382.867
5	1	-1533	3.146	-487.285
1	1	-3650	7.15	-510.49
2	1	-9782	12.584	-777.336
3	1	-584	0.858	-680.653
3	2	-292	7.722	-37.814
4	1	0	4.862	0
4	2	-1095	2.86	-382.867
4	3	0	4.29	0
4	4	-438	0.572	-765.734
5	1	-2117	1.716	-1233.68
6	1	-2263	4.004	-565.185
7	1	-1387	2.288	-606.206
8	1	-1460	3.146	-464.081
9	1	-365	4.576	-79.764
9	2	73	6.006	12.1545
9	3	-511	3.432	-148.893
9	4	0	1.716	0
9	5	-1460	8.008	-182.318
1	1	-6132	4.862	-1261.21
1	2	0	0.858	0
1	3	-2263	2.288	-989.073
1	4	0	1.144	0
1	5	-8541	9.724	-878.342
2	1	-4818	11.154	-431.953
3	1	-2409	4.576	-526.442
4	1	-876	1.43	-612.587
5	1	-1971	4.004	-492.258
5	2	-438	11.44	-38.2867
5	3	-511	3.718	-137.439
6	1	-1971	4.862	-405.389
6	2	-73	7.15	-10.2098
6	3	-657	2.002	-328.172
7	1	-3504	4.862	-720.691
8	1	-1387	2.002	-692.807
8	2	0	2.574	0
9	1	-219	0.858	-255.245
9	2	-73	8.866	-8.2337
9	3	-292	1.716	-170.163
9	4	-73	4.862	-15.0144
10	1	-2774	3.432	-808.275
11	1	-1022	2.86	-357.343
11	2	0	2.002	0
11	3	-1168	1.716	-680.653
11	4	-219	4.576	-47.8584
11	5	-876	2.002	-437.562
12	1	-1314	5.148	-255.245
12	2	-949	1.144	-829.545
12	3	0	1.144	0
12	4	-438	1.144	-382.867
12	5	0	2.002	0
12	6	-949	1.716	-553.03
12	7	0	3.146	0
13	1	-1752	2.86	-612.587
13	2	0	2.002	0
13	3	-2920	4.004	-729.271
14	1	-2993	6.578	-455.002
15	1	-803	3.718	-215.976
15	2	73	1.716	42.5408
15	3	-876	2.002	-437.562
1	1	-1606	6.006	-267.399
2	1	-1825	17.446	-104.609
3	1	-73	36.894	-1.97864
3	2	-876	2.002	-437.562
4	1	-365	2.288	-159.528
4	2	-1606	2.288	-701.923
4	3	0	8.866	0
5	1	-1314	6.864	-191.434
5	2	-803	0.858	-935.897
5	3	-584	6.578	-88.7808
6	1	-657	1.43	-459.441
